# Supplementary material for: Cytoprotective Effects of Human Platelet Lysate during the Xeno-Free Culture of Human Donor Corneas
Source: Int J Mol Sci. 2023 Feb 2;24(3):2882. doi: 10.3390/ijms24032882 (PMC9917909; doi:10.3390/ijms24032882)
Supplement: Supplementary file 1 [file ijms-24-02882-s001.zip]

Archive with 5 entries (5 files):
- Supplementary Data S1 .xlsx
- Supplementary Data S2 .xlsx
- supplementary Data S3 .pdf
- supplementary Data S4 .jpg
- supplementary Data S5 .xlsx
