# Supplementary material for: Cytoprotective Effects of Human Platelet Lysate during the Xeno-Free Culture of Human Donor Corneas
Source: Int J Mol Sci. 2023 Feb 2;24(3):2882. doi: 10.3390/ijms24032882 (PMC9917909; doi:10.3390/ijms24032882)
Supplement: Supplementary file 1 [file ijms-24-02882-s001.zip › Supplementary Data S1 .xlsx]

## Sheet: Explanation
	Suppl. Data S1: Excel file with the differential expression analysis of 2%HPL vs 2%FBS for the DmE and stroma. 2%FBS was set as the control, so a log2 fold change (log2FC) of 1 would indicate a gene expression twice as high in the 2%HPL compared to the 2%FBS samples. We also included a window listing the genes that were significantly differentially regulated in the DmE as well as the stroma.

## Sheet: endothelial FBS vs hPL (sign.)
gene_id	gene_name	baseMean	log2FoldChange	lfcSE	stat	pvalue	padj	sig	highlight	description
ENSG00000000003	TSPAN6	2150.25	-1.02939	0.129609	-7.9423	1.98468e-15	7.10912e-13	Sig. genes		tetraspanin 6 [Source:HGNC Symbol;Acc:HGNC:11858]
ENSG00000004779	NDUFAB1	600.181	-0.2145	0.0641621	-3.34309	0.000828514	0.0138421	Sig. genes		NADH:ubiquinone oxidoreductase subunit AB1 [Source:HGNC Symbol;Acc:HGNC:7694]
ENSG00000005810	MYCBP2	1092.78	-0.446454	0.126759	-3.52206	0.000428207	0.00829999	Sig. genes
ENSG00000006042	TMEM98	428.844	0.244324	0.0826287	2.95689	0.00310755	0.0374538	Sig. genes		transmembrane protein 98 [Source:HGNC Symbol;Acc:HGNC:24529]
ENSG00000006327	TNFRSF12A	181.625	1.11784	0.154012	7.25813	3.92491e-13	9.0122e-11	Sig. genes		TNF receptor superfamily member 12A [Source:HGNC Symbol;Acc:HGNC:18152]
ENSG00000006451	RALA	643.197	0.526101	0.147437	3.5683	0.000359302	0.00724674	Sig. genes		RAS like proto-oncogene A [Source:HGNC Symbol;Acc:HGNC:9839]
ENSG00000007202	KIAA0100	231.179	-0.676493	0.227919	-2.96812	0.00299625	0.03663	Sig. genes		KIAA0100 [Source:HGNC Symbol;Acc:HGNC:28960]
ENSG00000007516	BAIAP3	27.8643	-1.17213	0.290273	-4.03803	5.39022e-05	0.00163072	Sig. genes		BAI1 associated protein 3 [Source:HGNC Symbol;Acc:HGNC:948]
ENSG00000007944	MYLIP	272.033	-0.755759	0.11451	-6.59991	4.11395e-11	6.29752e-09	Sig. genes		myosin regulatory light chain interacting protein [Source:HGNC Symbol;Acc:HGNC:21155]
ENSG00000008196	TFAP2B	1862.48	-1.11867	0.146391	-7.64161	2.14528e-14	6.29867e-12	Sig. genes		transcription factor AP-2 beta [Source:HGNC Symbol;Acc:HGNC:11743]
ENSG00000008283	CYB561	287.839	-0.394959	0.0980197	-4.02939	5.59225e-05	0.00167839	Sig. genes		cytochrome b561 [Source:HGNC Symbol;Acc:HGNC:2571]
ENSG00000008988	RPS20	10811.2	0.242658	0.060721	3.99628	6.43458e-05	0.00188614	Sig. genes		ribosomal protein S20 [Source:HGNC Symbol;Acc:HGNC:10405]
ENSG00000009694	TENM1	21.1619	-1.24705	0.406305	-3.06926	0.00214592	0.028746	Sig. genes		teneurin transmembrane protein 1 [Source:HGNC Symbol;Acc:HGNC:8117]
ENSG00000010361	FUZ	47.8884	-0.605238	0.208417	-2.90398	0.00368456	0.0425745	Sig. genes		fuzzy planar cell polarity protein [Source:HGNC Symbol;Acc:HGNC:26219]
ENSG00000010404	IDS	1175.1	0.315437	0.0776349	4.06308	4.84301e-05	0.00150066	Sig. genes		iduronate 2-sulfatase [Source:HGNC Symbol;Acc:HGNC:5389]
ENSG00000011028	MRC2	800.963	0.688417	0.112286	6.13093	8.73666e-10	1.02943e-07	Sig. genes		mannose receptor C type 2 [Source:HGNC Symbol;Acc:HGNC:16875]
ENSG00000011295	TTC19	294.912	-0.309961	0.0954001	-3.24907	0.00115785	0.0178818	Sig. genes		tetratricopeptide repeat domain 19 [Source:HGNC Symbol;Acc:HGNC:26006]
ENSG00000011426	ANLN	22.7925	1.61016	0.564612	2.8518	0.00434722	0.0480906	Sig. genes		anillin actin binding protein [Source:HGNC Symbol;Acc:HGNC:14082]
ENSG00000013297	CLDN11	727.131	-0.570471	0.142568	-4.0014	6.29696e-05	0.00185797	Sig. genes		claudin 11 [Source:HGNC Symbol;Acc:HGNC:8514]
ENSG00000014641	MDH1	361.245	-0.358217	0.0976751	-3.66743	0.000245002	0.0054374	Sig. genes		malate dehydrogenase 1 [Source:HGNC Symbol;Acc:HGNC:6970]
ENSG00000019144	PHLDB1	532.86	0.431412	0.0867249	4.97449	6.54189e-07	3.58304e-05	Sig. genes
ENSG00000019505	SYT13	62.1655	-0.759986	0.210431	-3.61157	0.000304351	0.00636772	Sig. genes		synaptotagmin 13 [Source:HGNC Symbol;Acc:HGNC:14962]
ENSG00000019582	CD74	248.106	-0.494081	0.143526	-3.44244	0.000576488	0.0103768	Sig. genes
ENSG00000020129	NCDN	65.3404	-0.420614	0.140707	-2.98929	0.00279625	0.0349239	Sig. genes		neurochondrin [Source:HGNC Symbol;Acc:HGNC:17597]
ENSG00000021355	SERPINB1	397.631	-0.530925	0.16433	-3.23085	0.00123422	0.0187488	Sig. genes		serpin family B member 1 [Source:HGNC Symbol;Acc:HGNC:3311]
ENSG00000023228	NDUFS1	453.474	-0.52114	0.132731	-3.92628	8.627e-05	0.00235174	Sig. genes		NADH:ubiquinone oxidoreductase core subunit S1 [Source:HGNC Symbol;Acc:HGNC:7707]
ENSG00000023909	GCLM	513.976	0.88974	0.0934053	9.52559	1.64109e-21	1.13046e-18	Sig. genes		glutamate-cysteine ligase modifier subunit [Source:HGNC Symbol;Acc:HGNC:4312]
ENSG00000024526	DEPDC1	8.56021	2.20587	0.774039	2.84982	0.00437445	0.0483215	Sig. genes		DEP domain containing 1 [Source:HGNC Symbol;Acc:HGNC:22949]
ENSG00000029534	ANK1	198.006	-1.75107	0.152972	-11.447	2.4336e-30	5.44823e-27	Sig. genes		ankyrin 1 [Source:HGNC Symbol;Acc:HGNC:492]
ENSG00000029993	HMGB3	67.0029	0.933032	0.29032	3.2138	0.00130989	0.0196813	Sig. genes		high mobility group box 3 [Source:HGNC Symbol;Acc:HGNC:5004]
ENSG00000032444	PNPLA6	106.518	-0.43558	0.116092	-3.75203	0.000175409	0.00416577	Sig. genes		patatin like phospholipase domain containing 6 [Source:HGNC Symbol;Acc:HGNC:16268]
ENSG00000033100	CHPF2	302.254	0.447334	0.118769	3.76642	0.000165602	0.00395985	Sig. genes
ENSG00000033867	SLC4A7	453.915	0.475605	0.146606	3.2441	0.00117822	0.0180822	Sig. genes
ENSG00000034510	TMSB10	1624.45	0.684708	0.170146	4.02424	5.71592e-05	0.00171191	Sig. genes		thymosin beta 10 [Source:HGNC Symbol;Acc:HGNC:11879]
ENSG00000035403	VCL	449.127	0.299688	0.0889158	3.37047	0.000750413	0.0128121	Sig. genes		vinculin [Source:HGNC Symbol;Acc:HGNC:12665]
ENSG00000035928	RFC1	478.328	-0.293282	0.0853867	-3.43475	0.000593093	0.0106223	Sig. genes
ENSG00000038427	VCAN	108.88	2.48498	0.323098	7.6911	1.45877e-14	4.35444e-12	Sig. genes		versican [Source:HGNC Symbol;Acc:HGNC:2464]
ENSG00000039139	DNAH5	11.5046	-1.92897	0.492054	-3.92025	8.8456e-05	0.00240038	Sig. genes		dynein axonemal heavy chain 5 [Source:HGNC Symbol;Acc:HGNC:2950]
ENSG00000039523	RIPOR1	317.832	0.314597	0.0896334	3.50982	0.000448417	0.00860593	Sig. genes		RHO family interacting cell polarization regulator 1 [Source:HGNC Symbol;Acc:HGNC:25836]
ENSG00000041982	TNC	31.4456	1.22366	0.294374	4.15683	3.22692e-05	0.0010585	Sig. genes	Stroma_marker	tenascin C [Source:HGNC Symbol;Acc:HGNC:5318]
ENSG00000042062	RIPOR3	67.9353	-0.710616	0.177785	-3.99705	6.41361e-05	0.00188413	Sig. genes		RIPOR family member 3 [Source:HGNC Symbol;Acc:HGNC:16168]
ENSG00000043591	ADRB1	85.7359	-0.668456	0.222832	-2.99982	0.00270142	0.0341202	Sig. genes		adrenoceptor beta 1 [Source:HGNC Symbol;Acc:HGNC:285]
ENSG00000047365	ARAP2	34.1323	1.56699	0.420276	3.72848	0.000192642	0.00449832	Sig. genes
ENSG00000047849	MAP4	751.804	0.289995	0.0791624	3.66328	0.000249002	0.00549044	Sig. genes		microtubule associated protein 4 [Source:HGNC Symbol;Acc:HGNC:6862]
ENSG00000048544	MRPS10	573.642	-0.243931	0.0816335	-2.98813	0.00280694	0.0350086	Sig. genes		mitochondrial ribosomal protein S10 [Source:HGNC Symbol;Acc:HGNC:14502]
ENSG00000048740	CELF2	265.32	0.428653	0.144867	2.95893	0.00308709	0.0373075	Sig. genes
ENSG00000049192	ADAMTS6	36.9319	1.53936	0.321331	4.79057	1.66308e-06	7.94289e-05	Sig. genes		ADAM metallopeptidase with thrombospondin type 1 motif 6 [Source:HGNC Symbol;Acc:HGNC:222]
ENSG00000049449	RCN1	629.655	0.456043	0.0936092	4.87177	1.10602e-06	5.62749e-05	Sig. genes		reticulocalbin 1 [Source:HGNC Symbol;Acc:HGNC:9934]
ENSG00000049540	ELN	44.1325	1.86312	0.363561	5.12464	2.98102e-07	1.80372e-05	Sig. genes
ENSG00000049860	HEXB	654.905	0.335035	0.100331	3.33929	0.000839931	0.0139677	Sig. genes		hexosaminidase subunit beta [Source:HGNC Symbol;Acc:HGNC:4879]
ENSG00000050165	DKK3	927.788	0.414783	0.123663	3.35414	0.000796125	0.0134009	Sig. genes		dickkopf WNT signaling pathway inhibitor 3 [Source:HGNC Symbol;Acc:HGNC:2893]
ENSG00000051108	HERPUD1	614.937	0.362699	0.0978594	3.70633	0.000210284	0.00481384	Sig. genes		homocysteine inducible ER protein with ubiquitin like domain 1 [Source:HGNC Symbol;Acc:HGNC:13744]
ENSG00000052850	ALX4	115.722	-0.558534	0.158056	-3.53377	0.000409679	0.00798406	Sig. genes		ALX homeobox 4 [Source:HGNC Symbol;Acc:HGNC:450]
ENSG00000053328	METTL24	14.0029	-1.22803	0.431487	-2.84605	0.00442656	0.0486976	Sig. genes		methyltransferase like 24 [Source:HGNC Symbol;Acc:HGNC:21566]
ENSG00000054219	LY75	58.0264	-0.741503	0.238653	-3.10704	0.00188971	0.0261754	Sig. genes		lymphocyte antigen 75 [Source:HGNC Symbol;Acc:HGNC:6729]
ENSG00000054277	OPN3	180.421	0.72098	0.174719	4.12651	3.68315e-05	0.00119071	Sig. genes		opsin 3 [Source:HGNC Symbol;Acc:HGNC:14007]
ENSG00000054392	HHAT	30.0598	0.94121	0.329064	2.86026	0.00423291	0.0470586	Sig. genes		hedgehog acyltransferase [Source:HGNC Symbol;Acc:HGNC:18270]
ENSG00000054654	SYNE2	1684.49	-0.739666	0.141097	-5.24225	1.58634e-07	1.04839e-05	Sig. genes
ENSG00000054690	PLEKHH1	91.4247	-1.17295	0.154337	-7.59992	2.96314e-14	8.29217e-12	Sig. genes		pleckstrin homology, MyTH4 and FERM domain containing H1 [Source:HGNC Symbol;Acc:HGNC:17733]
ENSG00000054793	ATP9A	166.585	0.413391	0.103463	3.99554	6.4548e-05	0.00188898	Sig. genes		ATPase phospholipid transporting 9A (putative) [Source:HGNC Symbol;Acc:HGNC:13540]
ENSG00000057019	DCBLD2	287.417	0.587566	0.171511	3.42581	0.000612963	0.0109019	Sig. genes		discoidin, CUB and LCCL domain containing 2 [Source:HGNC Symbol;Acc:HGNC:24627]
ENSG00000058085	LAMC2	510.437	0.979015	0.228769	4.27949	1.87326e-05	0.000661738	Sig. genes		laminin subunit gamma 2 [Source:HGNC Symbol;Acc:HGNC:6493]
ENSG00000059145	UNKL	156.034	0.5167	0.132044	3.91309	9.11231e-05	0.00244703	Sig. genes		unk like zinc finger [Source:HGNC Symbol;Acc:HGNC:14184]
ENSG00000059728	MXD1	62.8945	0.696856	0.240583	2.89653	0.00377315	0.0433742	Sig. genes		MAX dimerization protein 1 [Source:HGNC Symbol;Acc:HGNC:6761]
ENSG00000059804	SLC2A3	554.867	1.03159	0.169595	6.08269	1.18181e-09	1.34817e-07	Sig. genes		solute carrier family 2 member 3 [Source:HGNC Symbol;Acc:HGNC:11007]
ENSG00000060718	COL11A1	10.4017	2.15021	0.663464	3.24089	0.00119159	0.0182405	Sig. genes		collagen type XI alpha 1 chain [Source:HGNC Symbol;Acc:HGNC:2186]
ENSG00000062716	VMP1	703.673	0.702649	0.135893	5.17059	2.33359e-07	1.46135e-05	Sig. genes		vacuole membrane protein 1 [Source:HGNC Symbol;Acc:HGNC:29559]
ENSG00000063180	CA11	277.081	-0.858598	0.222691	-3.85556	0.000115464	0.00299675	Sig. genes		carbonic anhydrase 11 [Source:HGNC Symbol;Acc:HGNC:1370]
ENSG00000064651	SLC12A2	853.871	-0.478642	0.11148	-4.29352	1.75865e-05	0.000623711	Sig. genes		solute carrier family 12 member 2 [Source:HGNC Symbol;Acc:HGNC:10911]
ENSG00000064652	SNX24	206.068	0.93419	0.179982	5.19045	2.09781e-07	1.34185e-05	Sig. genes		sorting nexin 24 [Source:HGNC Symbol;Acc:HGNC:21533]
ENSG00000064687	ABCA7	90.134	-0.943482	0.151886	-6.21177	5.23923e-10	6.60807e-08	Sig. genes		ATP binding cassette subfamily A member 7 [Source:HGNC Symbol;Acc:HGNC:37]
ENSG00000065150	IPO5	384.782	0.353553	0.100014	3.53502	0.000407741	0.00796363	Sig. genes		importin 5 [Source:HGNC Symbol;Acc:HGNC:6402]
ENSG00000065308	TRAM2	483.204	0.634074	0.0943199	6.72259	1.78517e-11	3.01626e-09	Sig. genes		translocation associated membrane protein 2 [Source:HGNC Symbol;Acc:HGNC:16855]
ENSG00000065485	PDIA5	64.2718	0.910166	0.201781	4.51066	6.46271e-06	0.000258942	Sig. genes		protein disulfide isomerase family A member 5 [Source:HGNC Symbol;Acc:HGNC:24811]
ENSG00000065613	SLK	861.251	-0.302892	0.0998164	-3.0345	0.00240937	0.0314169	Sig. genes		STE20 like kinase [Source:HGNC Symbol;Acc:HGNC:11088]
ENSG00000067836	ROGDI	45.5989	-0.57937	0.185373	-3.12544	0.00177541	0.0250375	Sig. genes		rogdi atypical leucine zipper [Source:HGNC Symbol;Acc:HGNC:29478]
ENSG00000068001	HYAL2	93.7043	-0.467978	0.144657	-3.2351	0.001216	0.0185348	Sig. genes		hyaluronidase 2 [Source:HGNC Symbol;Acc:HGNC:5321]
ENSG00000068120	COASY	152.819	-0.358137	0.0903297	-3.96477	7.34654e-05	0.00209517	Sig. genes		Coenzyme A synthase [Source:HGNC Symbol;Acc:HGNC:29932]
ENSG00000068366	ACSL4	236.067	0.682907	0.168293	4.05786	4.9525e-05	0.00152404	Sig. genes		acyl-CoA synthetase long chain family member 4 [Source:HGNC Symbol;Acc:HGNC:3571]
ENSG00000068831	RASGRP2	14.9241	-2.11235	0.450089	-4.69318	2.68991e-06	0.000119841	Sig. genes		RAS guanyl releasing protein 2 [Source:HGNC Symbol;Acc:HGNC:9879]
ENSG00000068912	ERLEC1	458.409	0.237436	0.0823977	2.88159	0.00395672	0.044738	Sig. genes
ENSG00000069011	PITX1	323.399	-0.309236	0.0914037	-3.38318	0.000716507	0.0123391	Sig. genes		paired like homeodomain 1 [Source:HGNC Symbol;Acc:HGNC:9004]
ENSG00000069020	MAST4	292.42	-0.871523	0.263238	-3.31078	0.000930368	0.0150387	Sig. genes
ENSG00000069702	TGFBR3	2296.02	-0.476198	0.111156	-4.28406	1.83516e-05	0.000649559	Sig. genes		transforming growth factor beta receptor 3 [Source:HGNC Symbol;Acc:HGNC:11774]
ENSG00000070193	FGF10	2808.55	-0.741695	0.167376	-4.43131	9.36622e-06	0.000366264	Sig. genes		fibroblast growth factor 10 [Source:HGNC Symbol;Acc:HGNC:3666]
ENSG00000070404	FSTL3	212.688	1.80876	0.182683	9.90108	4.11822e-23	4.09763e-20	Sig. genes		follistatin like 3 [Source:HGNC Symbol;Acc:HGNC:3973]
ENSG00000070501	POLB	220.418	-0.548058	0.118437	-4.62743	3.70239e-06	0.000157132	Sig. genes		DNA polymerase beta [Source:HGNC Symbol;Acc:HGNC:9174]
ENSG00000070614	NDST1	510.733	0.725724	0.107938	6.72351	1.77395e-11	3.01626e-09	Sig. genes		N-deacetylase and N-sulfotransferase 1 [Source:HGNC Symbol;Acc:HGNC:7680]
ENSG00000070669	ASNS	365.659	0.465958	0.145489	3.2027	0.00136147	0.0202525	Sig. genes		asparagine synthetase (glutamine-hydrolyzing) [Source:HGNC Symbol;Acc:HGNC:753]
ENSG00000070756	PABPC1	3604.34	0.457473	0.0919994	4.97257	6.60724e-07	3.60779e-05	Sig. genes		poly(A) binding protein cytoplasmic 1 [Source:HGNC Symbol;Acc:HGNC:8554]
ENSG00000070770	CSNK2A2	248.463	0.389785	0.120068	3.24636	0.00116891	0.0179978	Sig. genes		casein kinase 2 alpha 2 [Source:HGNC Symbol;Acc:HGNC:2459]
ENSG00000071127	WDR1	812.191	0.232995	0.0683003	3.41133	0.000646477	0.0113292	Sig. genes		WD repeat domain 1 [Source:HGNC Symbol;Acc:HGNC:12754]
ENSG00000071282	LMCD1	412.601	1.80746	0.14708	12.289	1.03812e-34	4.6482e-31	Sig. genes		LIM and cysteine rich domains 1 [Source:HGNC Symbol;Acc:HGNC:6633]
ENSG00000071575	TRIB2	304.543	-1.04866	0.127434	-8.22908	1.88656e-16	7.34527e-14	Sig. genes		tribbles pseudokinase 2 [Source:HGNC Symbol;Acc:HGNC:30809]
ENSG00000072062	PRKACA	351.445	-0.364743	0.112132	-3.25282	0.00114268	0.0177036	Sig. genes		protein kinase cAMP-activated catalytic subunit alpha [Source:HGNC Symbol;Acc:HGNC:9380]
ENSG00000072071	ADGRL1	307.696	-0.392135	0.116464	-3.367	0.000759919	0.0129251	Sig. genes
ENSG00000072110	ACTN1	3610.32	0.872783	0.0915917	9.52905	1.58726e-21	1.13046e-18	Sig. genes		actinin alpha 1 [Source:HGNC Symbol;Acc:HGNC:163]
ENSG00000072133	RPS6KA6	121.541	-0.58387	0.155657	-3.751	0.000176133	0.00416835	Sig. genes		ribosomal protein S6 kinase A6 [Source:HGNC Symbol;Acc:HGNC:10435]
ENSG00000072163	LIMS2	39.7808	0.703865	0.239408	2.94002	0.00328194	0.0389785	Sig. genes		LIM zinc finger domain containing 2 [Source:HGNC Symbol;Acc:HGNC:16084]
ENSG00000072274	TFRC	427.912	-0.444474	0.146842	-3.0269	0.00247079	0.0319277	Sig. genes		transferrin receptor [Source:HGNC Symbol;Acc:HGNC:11763]
ENSG00000072682	P4HA2	471.608	0.723701	0.0918391	7.8801	3.27119e-15	1.12667e-12	Sig. genes		prolyl 4-hydroxylase subunit alpha 2 [Source:HGNC Symbol;Acc:HGNC:8547]
ENSG00000072778	ACADVL	684.577	0.307907	0.0653269	4.71333	2.43704e-06	0.000109943	Sig. genes		acyl-CoA dehydrogenase very long chain [Source:HGNC Symbol;Acc:HGNC:92]
ENSG00000072954	TMEM38A	301.116	-0.494145	0.1014	-4.87324	1.09782e-06	5.60171e-05	Sig. genes		transmembrane protein 38A [Source:HGNC Symbol;Acc:HGNC:28462]
ENSG00000073008	PVR	464.341	0.719525	0.114875	6.26354	3.76339e-10	4.88423e-08	Sig. genes		PVR cell adhesion molecule [Source:HGNC Symbol;Acc:HGNC:9705]
ENSG00000073578	SDHA	402.995	-0.327469	0.111275	-2.94288	0.00325175	0.0387227	Sig. genes
ENSG00000073792	IGF2BP2	426.116	-0.296022	0.0784902	-3.77146	0.000162297	0.00392272	Sig. genes		insulin like growth factor 2 mRNA binding protein 2 [Source:HGNC Symbol;Acc:HGNC:28867]
ENSG00000073921	PICALM	443.264	0.507438	0.112337	4.51711	6.26902e-06	0.000254023	Sig. genes		phosphatidylinositol binding clathrin assembly protein [Source:HGNC Symbol;Acc:HGNC:15514]
ENSG00000074410	CA12	11680	-0.463797	0.123129	-3.76675	0.000165386	0.00395985	Sig. genes		carbonic anhydrase 12 [Source:HGNC Symbol;Acc:HGNC:1371]
ENSG00000074590	NUAK1	252.006	0.570457	0.106313	5.36582	8.05819e-08	5.74989e-06	Sig. genes		NUAK family kinase 1 [Source:HGNC Symbol;Acc:HGNC:14311]
ENSG00000074657	ZNF532	350.415	0.567213	0.155728	3.64232	0.000270193	0.00581629	Sig. genes		zinc finger protein 532 [Source:HGNC Symbol;Acc:HGNC:30940]
ENSG00000074695	LMAN1	1408.3	0.303677	0.0844442	3.59619	0.000322908	0.0066551	Sig. genes		lectin, mannose binding 1 [Source:HGNC Symbol;Acc:HGNC:6631]
ENSG00000074800	ENO1	18591.4	-0.426622	0.0737789	-5.78243	7.36279e-09	6.83251e-07	Sig. genes		enolase 1 [Source:HGNC Symbol;Acc:HGNC:3350]
ENSG00000075624	ACTB	4352.68	0.513604	0.128713	3.99031	6.59879e-05	0.00191237	Sig. genes		actin beta [Source:HGNC Symbol;Acc:HGNC:132]
ENSG00000076067	RBMS2	135.158	0.371528	0.126918	2.92731	0.00341913	0.0403138	Sig. genes		RNA binding motif single stranded interacting protein 2 [Source:HGNC Symbol;Acc:HGNC:9909]
ENSG00000076321	KLHL20	233.781	0.285441	0.0837816	3.40696	0.000656902	0.0114782	Sig. genes		kelch like family member 20 [Source:HGNC Symbol;Acc:HGNC:25056]
ENSG00000076555	ACACB	99.6887	-1.17037	0.265394	-4.40992	1.03407e-05	0.000400004	Sig. genes
ENSG00000076716	GPC4	1041.16	0.863727	0.0902212	9.57343	1.03416e-21	7.97521e-19	Sig. genes		glypican 4 [Source:HGNC Symbol;Acc:HGNC:4452]
ENSG00000076864	RAP1GAP	194.758	-0.753508	0.112983	-6.66921	2.5718e-11	4.14963e-09	Sig. genes
ENSG00000077264	PAK3	40.763	2.15341	0.462715	4.65385	3.2579e-06	0.0001406	Sig. genes		p21 (RAC1) activated kinase 3 [Source:HGNC Symbol;Acc:HGNC:8592]
ENSG00000077274	CAPN6	597.08	1.67913	0.242159	6.93399	4.09145e-12	7.71346e-10	Sig. genes		calpain 6 [Source:HGNC Symbol;Acc:HGNC:1483]
ENSG00000077279	DCX	11.452	3.81389	0.856439	4.45319	8.4602e-06	0.000333749	Sig. genes		doublecortin [Source:HGNC Symbol;Acc:HGNC:2714]
ENSG00000077684	JADE1	276.841	0.489357	0.0996328	4.91161	9.03327e-07	4.77244e-05	Sig. genes		jade family PHD finger 1 [Source:HGNC Symbol;Acc:HGNC:30027]
ENSG00000078070	MCCC1	91.7921	-0.687696	0.209823	-3.2775	0.00104731	0.0164827	Sig. genes
ENSG00000078081	LAMP3	47.7372	1.22923	0.319452	3.84793	0.000119122	0.00306971	Sig. genes		lysosomal associated membrane protein 3 [Source:HGNC Symbol;Acc:HGNC:14582]
ENSG00000078098	FAP	368.283	1.47513	0.164399	8.97288	2.88862e-19	1.61672e-16	Sig. genes
ENSG00000078124	ACER3	425.541	-0.434709	0.106495	-4.08197	4.46562e-05	0.00140809	Sig. genes		alkaline ceramidase 3 [Source:HGNC Symbol;Acc:HGNC:16066]
ENSG00000078295	ADCY2	212.592	0.597715	0.204917	2.91686	0.00353579	0.0412547	Sig. genes		adenylate cyclase 2 [Source:HGNC Symbol;Acc:HGNC:233]
ENSG00000078328	RBFOX1	52.6571	-1.65652	0.197153	-8.40222	4.38124e-17	1.9617e-14	Sig. genes		RNA binding fox-1 homolog 1 [Source:HGNC Symbol;Acc:HGNC:18222]
ENSG00000078369	GNB1	1027.05	0.172223	0.0557412	3.08969	0.00200365	0.0272785	Sig. genes		G protein subunit beta 1 [Source:HGNC Symbol;Acc:HGNC:4396]
ENSG00000078401	EDN1	51.7858	1.21505	0.30025	4.04681	5.19211e-05	0.00158147	Sig. genes		endothelin 1 [Source:HGNC Symbol;Acc:HGNC:3176]
ENSG00000078487	ZCWPW1	97.1036	-0.404217	0.130137	-3.10609	0.0018958	0.0262394	Sig. genes		zinc finger CW-type and PWWP domain containing 1 [Source:HGNC Symbol;Acc:HGNC:23486]
ENSG00000078549	ADCYAP1R1	58.7086	-1.26317	0.30763	-4.10612	4.02364e-05	0.00128455	Sig. genes		ADCYAP receptor type I [Source:HGNC Symbol;Acc:HGNC:242]
ENSG00000078808	SDF4	1031.89	0.19645	0.0449021	4.37506	1.21397e-05	0.000450627	Sig. genes		stromal cell derived factor 4 [Source:HGNC Symbol;Acc:HGNC:24188]
ENSG00000079308	TNS1	494.072	0.446882	0.134347	3.32633	0.000879971	0.0144457	Sig. genes		tensin 1 [Source:HGNC Symbol;Acc:HGNC:11973]
ENSG00000079805	DNM2	491.447	-0.32514	0.0928156	-3.50308	0.000459915	0.0088003	Sig. genes		dynamin 2 [Source:HGNC Symbol;Acc:HGNC:2974]
ENSG00000080298	RFX3	90.676	-0.502716	0.139122	-3.61348	0.000302114	0.00636572	Sig. genes		regulatory factor X3 [Source:HGNC Symbol;Acc:HGNC:9984]
ENSG00000080493	SLC4A4	1644.2	-0.472683	0.161651	-2.9241	0.00345451	0.0405589	Sig. genes	Endo_marker	solute carrier family 4 member 4 [Source:HGNC Symbol;Acc:HGNC:11030]
ENSG00000080503	SMARCA2	1300.45	-0.401581	0.124218	-3.23288	0.00122551	0.0186323	Sig. genes		SWI/SNF related, matrix associated, actin dependent regulator of chromatin, subfamily a, member 2 [Source:HGNC Symbol;Acc:HGNC:11098]
ENSG00000081026	MAGI3	796.747	-0.669692	0.142831	-4.68871	2.74937e-06	0.000121884	Sig. genes		membrane associated guanylate kinase, WW and PDZ domain containing 3 [Source:HGNC Symbol;Acc:HGNC:29647]
ENSG00000082074	FYB1	51.8063	0.991993	0.299507	3.31208	0.000926043	0.0149823	Sig. genes		FYN binding protein 1 [Source:HGNC Symbol;Acc:HGNC:4036]
ENSG00000082126	MPP4	12.8122	1.31078	0.418827	3.12966	0.00175012	0.0248088	Sig. genes		membrane palmitoylated protein 4 [Source:HGNC Symbol;Acc:HGNC:13680]
ENSG00000082175	PGR	72.7929	-0.772139	0.229165	-3.36935	0.000753444	0.0128394	Sig. genes
ENSG00000082269	FAM135A	167.167	-0.401381	0.132429	-3.03092	0.00243814	0.0316199	Sig. genes		family with sequence similarity 135 member A [Source:HGNC Symbol;Acc:HGNC:21084]
ENSG00000082781	ITGB5	2177.84	0.508843	0.0908662	5.59992	2.14453e-08	1.77817e-06	Sig. genes		integrin subunit beta 5 [Source:HGNC Symbol;Acc:HGNC:6160]
ENSG00000083312	TNPO1	1732.32	0.292289	0.100648	2.90407	0.00368348	0.0425745	Sig. genes		transportin 1 [Source:HGNC Symbol;Acc:HGNC:6401]
ENSG00000083444	PLOD1	610.427	0.490351	0.109173	4.49152	7.07182e-06	0.000282085	Sig. genes		procollagen-lysine,2-oxoglutarate 5-dioxygenase 1 [Source:HGNC Symbol;Acc:HGNC:9081]
ENSG00000083845	RPS5	4815.85	0.286876	0.0827154	3.46823	0.000523893	0.00962351	Sig. genes		ribosomal protein S5 [Source:HGNC Symbol;Acc:HGNC:10426]
ENSG00000083937	CHMP2B	572.784	0.2473	0.0679658	3.63859	0.000274134	0.00587992	Sig. genes		charged multivesicular body protein 2B [Source:HGNC Symbol;Acc:HGNC:24537]
ENSG00000084070	SMAP2	139.119	-0.870155	0.169639	-5.12944	2.90604e-07	1.77031e-05	Sig. genes		small ArfGAP2 [Source:HGNC Symbol;Acc:HGNC:25082]
ENSG00000084207	GSTP1	2609.93	-0.179502	0.0565918	-3.17187	0.00151459	0.0220797	Sig. genes		glutathione S-transferase pi 1 [Source:HGNC Symbol;Acc:HGNC:4638]
ENSG00000084636	COL16A1	50.7974	1.33805	0.263694	5.07425	3.89023e-07	2.27693e-05	Sig. genes		collagen type XVI alpha 1 chain [Source:HGNC Symbol;Acc:HGNC:2193]
ENSG00000085449	WDFY1	133.626	0.743883	0.230511	3.2271	0.00125052	0.0189482	Sig. genes		WD repeat and FYVE domain containing 1 [Source:HGNC Symbol;Acc:HGNC:20451]
ENSG00000086062	B4GALT1	1178.6	0.485864	0.0977449	4.97073	6.67004e-07	3.63101e-05	Sig. genes		beta-1,4-galactosyltransferase 1 [Source:HGNC Symbol;Acc:HGNC:924]
ENSG00000086991	NOX4	25.6951	1.74682	0.269773	6.47516	9.47142e-11	1.37913e-08	Sig. genes		NADPH oxidase 4 [Source:HGNC Symbol;Acc:HGNC:7891]
ENSG00000087074	PPP1R15A	364.123	0.491237	0.123579	3.9751	7.03503e-05	0.00201596	Sig. genes		protein phosphatase 1 regulatory subunit 15A [Source:HGNC Symbol;Acc:HGNC:14375]
ENSG00000087086	FTL	17847.5	0.533756	0.113616	4.69787	2.62883e-06	0.000118001	Sig. genes		ferritin light chain [Source:HGNC Symbol;Acc:HGNC:3999]
ENSG00000088387	DOCK9	108.532	-0.706617	0.237533	-2.97482	0.0029316	0.0359376	Sig. genes
ENSG00000088836	SLC4A11	2153.22	-1.23668	0.142551	-8.67535	4.12277e-18	2.10968e-15	Sig. genes	Endo_marker	solute carrier family 4 member 11 [Source:HGNC Symbol;Acc:HGNC:16438]
ENSG00000088899	LZTS3	121.161	-0.418015	0.12866	-3.24899	0.00115817	0.0178818	Sig. genes		leucine zipper tumor suppressor family member 3 [Source:HGNC Symbol;Acc:HGNC:30139]
ENSG00000089009	RPL6	7791.93	0.14939	0.0444018	3.36451	0.000766806	0.0130175	Sig. genes		ribosomal protein L6 [Source:HGNC Symbol;Acc:HGNC:10362]
ENSG00000089057	SLC23A2	141.031	-0.460929	0.114054	-4.04134	5.31476e-05	0.00161062	Sig. genes		solute carrier family 23 member 2 [Source:HGNC Symbol;Acc:HGNC:10973]
ENSG00000089157	RPLP0	8482.95	0.275048	0.0765043	3.5952	0.000324143	0.00666521	Sig. genes		ribosomal protein lateral stalk subunit P0 [Source:HGNC Symbol;Acc:HGNC:10371]
ENSG00000089199	CHGB	109.45	-0.877725	0.200532	-4.37698	1.20333e-05	0.000449928	Sig. genes		chromogranin B [Source:HGNC Symbol;Acc:HGNC:1930]
ENSG00000089327	FXYD5	79.9552	0.711974	0.202571	3.5147	0.000440256	0.00847848	Sig. genes		FXYD domain containing ion transport regulator 5 [Source:HGNC Symbol;Acc:HGNC:4029]
ENSG00000090097	PCBP4	355.835	-0.299592	0.105023	-2.85264	0.00433576	0.0480232	Sig. genes		poly(rC) binding protein 4 [Source:HGNC Symbol;Acc:HGNC:8652]
ENSG00000090266	NDUFB2	592.703	-0.337448	0.0877174	-3.84699	0.00011958	0.00307071	Sig. genes		NADH:ubiquinone oxidoreductase subunit B2 [Source:HGNC Symbol;Acc:HGNC:7697]
ENSG00000090615	GOLGA3	426.448	0.416506	0.112982	3.68649	0.000227364	0.00511569	Sig. genes
ENSG00000090621	PABPC4	937.836	0.356111	0.0708871	5.02363	5.07027e-07	2.90123e-05	Sig. genes		poly(A) binding protein cytoplasmic 4 [Source:HGNC Symbol;Acc:HGNC:8557]
ENSG00000090971	NAT14	127.832	-0.574528	0.147998	-3.88201	0.000103598	0.00272458	Sig. genes		N-acetyltransferase 14 (putative) [Source:HGNC Symbol;Acc:HGNC:28918]
ENSG00000091136	LAMB1	3948.84	-0.425403	0.128218	-3.31781	0.000907248	0.0147448	Sig. genes		laminin subunit beta 1 [Source:HGNC Symbol;Acc:HGNC:6486]
ENSG00000091137	SLC26A4	274.552	-1.15652	0.227303	-5.08799	3.61885e-07	2.13203e-05	Sig. genes		solute carrier family 26 member 4 [Source:HGNC Symbol;Acc:HGNC:8818]
ENSG00000091262	ABCC6	22.5444	-2.11745	0.629489	-3.36376	0.000768893	0.0130283	Sig. genes		ATP binding cassette subfamily C member 6 [Source:HGNC Symbol;Acc:HGNC:57]
ENSG00000091490	SEL1L3	110.165	0.621804	0.208587	2.98103	0.00287281	0.0354109	Sig. genes		SEL1L family member 3 [Source:HGNC Symbol;Acc:HGNC:29108]
ENSG00000091656	ZFHX4	2535.88	-0.506414	0.101341	-4.99711	5.81972e-07	3.237e-05	Sig. genes		zinc finger homeobox 4 [Source:HGNC Symbol;Acc:HGNC:30939]
ENSG00000091986	CCDC80	2559.27	0.375368	0.104768	3.58284	0.000339884	0.00694108	Sig. genes		coiled-coil domain containing 80 [Source:HGNC Symbol;Acc:HGNC:30649]
ENSG00000092010	PSME1	977.886	-0.255763	0.0769203	-3.32504	0.000884067	0.0144864	Sig. genes		proteasome activator subunit 1 [Source:HGNC Symbol;Acc:HGNC:9568]
ENSG00000092096	SLC22A17	528.499	-0.303841	0.10138	-2.99706	0.002726	0.0343097	Sig. genes
ENSG00000092969	TGFB2	627.793	0.538305	0.14106	3.81614	0.000135554	0.00339549	Sig. genes		transforming growth factor beta 2 [Source:HGNC Symbol;Acc:HGNC:11768]
ENSG00000094804	CDC6	22.0847	1.89391	0.593433	3.19144	0.00141564	0.0210056	Sig. genes		cell division cycle 6 [Source:HGNC Symbol;Acc:HGNC:1744]
ENSG00000094914	AAAS	65.3962	-0.565946	0.156729	-3.61099	0.000305026	0.00636772	Sig. genes		aladin WD repeat nucleoporin [Source:HGNC Symbol;Acc:HGNC:13666]
ENSG00000094916	CBX5	780.602	-0.474238	0.125621	-3.77514	0.00015992	0.00388625	Sig. genes		chromobox 5 [Source:HGNC Symbol;Acc:HGNC:1555]
ENSG00000095066	HOOK2	123.406	-0.416402	0.144946	-2.87281	0.00406841	0.0456263	Sig. genes		hook microtubule tethering protein 2 [Source:HGNC Symbol;Acc:HGNC:19885]
ENSG00000095209	TMEM38B	102.821	0.420517	0.109991	3.82319	0.000131736	0.00332687	Sig. genes		transmembrane protein 38B [Source:HGNC Symbol;Acc:HGNC:25535]
ENSG00000095380	NANS	190.861	0.330759	0.104888	3.15345	0.00161356	0.0231932	Sig. genes		N-acetylneuraminate synthase [Source:HGNC Symbol;Acc:HGNC:19237]
ENSG00000095637	SORBS1	153.372	-0.601134	0.168346	-3.57083	0.000355851	0.00720147	Sig. genes		sorbin and SH3 domain containing 1 [Source:HGNC Symbol;Acc:HGNC:14565]
ENSG00000095752	IL11	726.626	1.01563	0.23213	4.37527	1.21281e-05	0.000450627	Sig. genes		interleukin 11 [Source:HGNC Symbol;Acc:HGNC:5966]
ENSG00000097007	ABL1	210.069	0.34804	0.117683	2.95743	0.00310213	0.0374135	Sig. genes		ABL proto-oncogene 1, non-receptor tyrosine kinase [Source:HGNC Symbol;Acc:HGNC:76]
ENSG00000099219	ERMP1	213.216	-0.977608	0.138796	-7.04351	1.87452e-12	3.81507e-10	Sig. genes
ENSG00000099860	GADD45B	597.575	1.31625	0.125522	10.4862	9.99809e-26	1.49221e-22	Sig. genes		growth arrest and DNA damage inducible beta [Source:HGNC Symbol;Acc:HGNC:4096]
ENSG00000099968	BCL2L13	1163.4	-0.383786	0.11377	-3.37334	0.000742634	0.0127278	Sig. genes		BCL2 like 13 [Source:HGNC Symbol;Acc:HGNC:17164]
ENSG00000099977	DDT	397.58	-0.29588	0.0802582	-3.68661	0.000227264	0.00511569	Sig. genes		D-dopachrome tautomerase [Source:HGNC Symbol;Acc:HGNC:2732]
ENSG00000100003	SEC14L2	61.9487	0.611535	0.19717	3.10156	0.00192504	0.0265211	Sig. genes		SEC14 like lipid binding 2 [Source:HGNC Symbol;Acc:HGNC:10699]
ENSG00000100147	CCDC134	58.7004	-0.370074	0.128347	-2.8834	0.00393413	0.0445438	Sig. genes		coiled-coil domain containing 134 [Source:HGNC Symbol;Acc:HGNC:26185]
ENSG00000100219	XBP1	494.641	0.39869	0.094763	4.20723	2.58519e-05	0.000859011	Sig. genes
ENSG00000100234	TIMP3	7186.01	0.363656	0.125993	2.88632	0.00389775	0.044323	Sig. genes		TIMP metallopeptidase inhibitor 3 [Source:HGNC Symbol;Acc:HGNC:11822]
ENSG00000100242	SUN2	607.052	0.371808	0.106919	3.47748	0.000506142	0.00938407	Sig. genes
ENSG00000100280	AP1B1	461.53	-0.404758	0.110107	-3.67605	0.000236875	0.00528982	Sig. genes		adaptor related protein complex 1 subunit beta 1 [Source:HGNC Symbol;Acc:HGNC:554]
ENSG00000100285	NEFH	95.9603	-0.463189	0.155234	-2.98382	0.00284677	0.0351823	Sig. genes		neurofilament heavy chain [Source:HGNC Symbol;Acc:HGNC:7737]
ENSG00000100292	HMOX1	849.525	3.44089	0.348217	9.88143	5.01113e-23	4.72365e-20	Sig. genes		heme oxygenase 1 [Source:HGNC Symbol;Acc:HGNC:5013]
ENSG00000100311	PDGFB	246.4	0.674215	0.143934	4.68421	2.8104e-06	0.000123856	Sig. genes		platelet derived growth factor subunit B [Source:HGNC Symbol;Acc:HGNC:8800]
ENSG00000100316	RPL3	4464.92	0.165343	0.0490693	3.36957	0.000752858	0.0128394	Sig. genes		ribosomal protein L3 [Source:HGNC Symbol;Acc:HGNC:10332]
ENSG00000100345	MYH9	1802.34	0.472472	0.0504063	9.37329	7.03084e-21	4.34215e-18	Sig. genes
ENSG00000100348	TXN2	532.075	-0.337436	0.0881739	-3.82694	0.000129748	0.00329149	Sig. genes		thioredoxin 2 [Source:HGNC Symbol;Acc:HGNC:17772]
ENSG00000100362	PVALB	56.5478	-1.85721	0.245545	-7.56361	3.9203e-14	1.04795e-11	Sig. genes		parvalbumin [Source:HGNC Symbol;Acc:HGNC:9704]
ENSG00000100439	ABHD4	199.504	0.7025	0.138566	5.0698	3.98241e-07	2.32329e-05	Sig. genes
ENSG00000100442	FKBP3	451.01	-0.25947	0.0777906	-3.33549	0.000851506	0.014147	Sig. genes		FKBP prolyl isomerase 3 [Source:HGNC Symbol;Acc:HGNC:3719]
ENSG00000100473	COCH	44.7836	0.875315	0.288703	3.03189	0.00243025	0.0315603	Sig. genes		cochlin [Source:HGNC Symbol;Acc:HGNC:2180]
ENSG00000100503	NIN	428.09	-0.625475	0.142578	-4.3869	1.1498e-05	0.000432624	Sig. genes		ninein [Source:HGNC Symbol;Acc:HGNC:14906]
ENSG00000100577	GSTZ1	72.1425	-0.501057	0.158561	-3.16002	0.00157757	0.0228594	Sig. genes		glutathione S-transferase zeta 1 [Source:HGNC Symbol;Acc:HGNC:4643]
ENSG00000100578	KIAA0586	147.512	-0.628862	0.160516	-3.91775	8.93793e-05	0.00241445	Sig. genes		KIAA0586 [Source:HGNC Symbol;Acc:HGNC:19960]
ENSG00000100580	TMED8	315.293	-0.296293	0.0867399	-3.41588	0.000635764	0.0111852	Sig. genes		transmembrane p24 trafficking protein family member 8 [Source:HGNC Symbol;Acc:HGNC:18633]
ENSG00000100592	DAAM1	659.815	1.34768	0.213307	6.31803	2.64911e-10	3.59436e-08	Sig. genes		dishevelled associated activator of morphogenesis 1 [Source:HGNC Symbol;Acc:HGNC:18142]
ENSG00000100626	GALNT16	5.55482	-2.52036	0.814401	-3.09474	0.00196984	0.0269312	Sig. genes		polypeptide N-acetylgalactosaminyltransferase 16 [Source:HGNC Symbol;Acc:HGNC:23233]
ENSG00000100650	SRSF5	797.699	-0.280203	0.0763135	-3.67174	0.000240903	0.00536639	Sig. genes		serine and arginine rich splicing factor 5 [Source:HGNC Symbol;Acc:HGNC:10787]
ENSG00000100711	ZFYVE21	177.981	0.382751	0.0972684	3.935	8.31972e-05	0.00229151	Sig. genes		zinc finger FYVE-type containing 21 [Source:HGNC Symbol;Acc:HGNC:20760]
ENSG00000100836	PABPN1	382.419	0.47896	0.15778	3.03563	0.00240036	0.0313571	Sig. genes		poly(A) binding protein nuclear 1 [Source:HGNC Symbol;Acc:HGNC:8565]
ENSG00000100889	PCK2	174.403	0.652133	0.107309	6.07712	1.22359e-09	1.37827e-07	Sig. genes		phosphoenolpyruvate carboxykinase 2, mitochondrial [Source:HGNC Symbol;Acc:HGNC:8725]
ENSG00000100906	NFKBIA	560.841	-0.267911	0.0878252	-3.0505	0.00228458	0.0302182	Sig. genes		NFKB inhibitor alpha [Source:HGNC Symbol;Acc:HGNC:7797]
ENSG00000100918	REC8	136.004	-0.704501	0.147491	-4.77657	1.7831e-06	8.3382e-05	Sig. genes
ENSG00000101150	TPD52L2	470.892	0.299719	0.0779745	3.84382	0.000121136	0.00309936	Sig. genes		TPD52 like 2 [Source:HGNC Symbol;Acc:HGNC:12007]
ENSG00000101187	SLCO4A1	84.657	-1.11218	0.200522	-5.54642	2.91585e-08	2.33138e-06	Sig. genes		solute carrier organic anion transporter family member 4A1 [Source:HGNC Symbol;Acc:HGNC:10953]
ENSG00000101198	NKAIN4	7.71855	2.9382	0.747661	3.92986	8.49967e-05	0.00232411	Sig. genes		sodium/potassium transporting ATPase interacting 4 [Source:HGNC Symbol;Acc:HGNC:16191]
ENSG00000101199	ARFGAP1	104.752	0.435621	0.119953	3.63158	0.000281688	0.00602032	Sig. genes		ADP ribosylation factor GTPase activating protein 1 [Source:HGNC Symbol;Acc:HGNC:15852]
ENSG00000101224	CDC25B	159.857	-0.390327	0.132496	-2.94596	0.00321957	0.0384905	Sig. genes		cell division cycle 25B [Source:HGNC Symbol;Acc:HGNC:1726]
ENSG00000101255	TRIB3	264.65	1.04845	0.203282	5.15761	2.50119e-07	1.5447e-05	Sig. genes		tribbles pseudokinase 3 [Source:HGNC Symbol;Acc:HGNC:16228]
ENSG00000101335	MYL9	778.702	0.524365	0.128743	4.07295	4.64205e-05	0.00144842	Sig. genes		myosin light chain 9 [Source:HGNC Symbol;Acc:HGNC:15754]
ENSG00000101421	CHMP4B	550.107	0.265216	0.0811848	3.26682	0.00108764	0.0169832	Sig. genes		charged multivesicular body protein 4B [Source:HGNC Symbol;Acc:HGNC:16171]
ENSG00000101439	CST3	2187.14	-0.493617	0.0832004	-5.93287	2.97682e-09	3.10214e-07	Sig. genes		cystatin C [Source:HGNC Symbol;Acc:HGNC:2475]
ENSG00000101443	WFDC2	39.7522	-0.835416	0.239536	-3.48763	0.000487314	0.00912948	Sig. genes		WAP four-disulfide core domain 2 [Source:HGNC Symbol;Acc:HGNC:15939]
ENSG00000101463	SYNDIG1	6.71587	1.74743	0.597319	2.92545	0.00343953	0.040479	Sig. genes		synapse differentiation inducing 1 [Source:HGNC Symbol;Acc:HGNC:15885]
ENSG00000101474	APMAP	451.324	0.190952	0.066663	2.86444	0.00417747	0.0467031	Sig. genes		adipocyte plasma membrane associated protein [Source:HGNC Symbol;Acc:HGNC:13238]
ENSG00000101608	MYL12A	806.574	0.488322	0.0725633	6.7296	1.7013e-11	2.92983e-09	Sig. genes		myosin light chain 12A [Source:HGNC Symbol;Acc:HGNC:16701]
ENSG00000101638	ST8SIA5	150.289	-1.16045	0.213225	-5.44238	5.25736e-08	3.9898e-06	Sig. genes		ST8 alpha-N-acetyl-neuraminide alpha-2,8-sialyltransferase 5 [Source:HGNC Symbol;Acc:HGNC:17827]
ENSG00000101665	SMAD7	61.3119	0.942586	0.182009	5.1788	2.23317e-07	1.4183e-05	Sig. genes		SMAD family member 7 [Source:HGNC Symbol;Acc:HGNC:6773]
ENSG00000101842	VSIG1	15.2728	1.17315	0.412175	2.84624	0.00442386	0.0486976	Sig. genes		V-set and immunoglobulin domain containing 1 [Source:HGNC Symbol;Acc:HGNC:28675]
ENSG00000102001	CACNA1F	5.11052	-2.90055	0.899327	-3.22525	0.00125865	0.0190553	Sig. genes		calcium voltage-gated channel subunit alpha1 F [Source:HGNC Symbol;Acc:HGNC:1393]
ENSG00000102359	SRPX2	547.949	0.531464	0.156128	3.40403	0.000663991	0.0115569	Sig. genes		sushi repeat containing protein X-linked 2 [Source:HGNC Symbol;Acc:HGNC:30668]
ENSG00000102401	ARMCX3	867.736	0.277762	0.0930086	2.98641	0.00282269	0.0350414	Sig. genes		armadillo repeat containing X-linked 3 [Source:HGNC Symbol;Acc:HGNC:24065]
ENSG00000102572	STK24	404.404	0.392591	0.129426	3.03332	0.00241879	0.03146	Sig. genes		serine/threonine kinase 24 [Source:HGNC Symbol;Acc:HGNC:11403]
ENSG00000102678	FGF9	131.012	-0.892679	0.203263	-4.39174	1.12445e-05	0.000424872	Sig. genes		fibroblast growth factor 9 [Source:HGNC Symbol;Acc:HGNC:3687]
ENSG00000102755	FLT1	46.4618	0.90319	0.254948	3.54265	0.000396134	0.00780724	Sig. genes		fms related receptor tyrosine kinase 1 [Source:HGNC Symbol;Acc:HGNC:3763]
ENSG00000102981	PARD6A	45.7764	-0.489692	0.142706	-3.43146	0.000600338	0.0107092	Sig. genes		par-6 family cell polarity regulator alpha [Source:HGNC Symbol;Acc:HGNC:15943]
ENSG00000103024	NME3	156.152	-0.368849	0.117483	-3.1396	0.00169178	0.0241241	Sig. genes		NME/NM23 nucleoside diphosphate kinase 3 [Source:HGNC Symbol;Acc:HGNC:7851]
ENSG00000103091	WDR59	193.922	-0.417137	0.139701	-2.98593	0.00282718	0.0350414	Sig. genes		WD repeat domain 59 [Source:HGNC Symbol;Acc:HGNC:25706]
ENSG00000103257	SLC7A5	132.105	0.746318	0.216218	3.45169	0.000557093	0.0100681	Sig. genes		solute carrier family 7 member 5 [Source:HGNC Symbol;Acc:HGNC:11063]
ENSG00000103335	PIEZO1	240.167	1.14602	0.122065	9.38856	6.08233e-21	3.89052e-18	Sig. genes		piezo type mechanosensitive ion channel component 1 [Source:HGNC Symbol;Acc:HGNC:28993]
ENSG00000103855	CD276	99.6148	0.595957	0.144095	4.13585	3.53642e-05	0.00114741	Sig. genes		CD276 molecule [Source:HGNC Symbol;Acc:HGNC:19137]
ENSG00000103888	CEMIP	1722.98	-0.90167	0.155522	-5.79769	6.72365e-09	6.30474e-07	Sig. genes		cell migration inducing hyaluronidase 1 [Source:HGNC Symbol;Acc:HGNC:29213]
ENSG00000104218	CSPP1	265.599	-0.310381	0.0904131	-3.43292	0.000597115	0.0106672	Sig. genes		centrosome and spindle pole associated protein 1 [Source:HGNC Symbol;Acc:HGNC:26193]
ENSG00000104331	BPNT2	400.163	0.211538	0.0678443	3.118	0.00182085	0.0254578	Sig. genes		3'(2'), 5'-bisphosphate nucleotidase 2 [Source:HGNC Symbol;Acc:HGNC:26019]
ENSG00000104332	SFRP1	3602.1	-1.18326	0.166706	-7.09786	1.26703e-12	2.6697e-10	Sig. genes		secreted frizzled related protein 1 [Source:HGNC Symbol;Acc:HGNC:10776]
ENSG00000104343	UBE2W	82.2635	-0.724484	0.151287	-4.7888	1.67785e-06	7.96277e-05	Sig. genes		ubiquitin conjugating enzyme E2 W [Source:HGNC Symbol;Acc:HGNC:25616]
ENSG00000104371	DKK4	21.4177	-2.25531	0.415254	-5.43116	5.59887e-08	4.15806e-06	Sig. genes		dickkopf WNT signaling pathway inhibitor 4 [Source:HGNC Symbol;Acc:HGNC:2894]
ENSG00000104447	TRPS1	546.37	-0.497287	0.0947131	-5.25046	1.51721e-07	1.01016e-05	Sig. genes		transcriptional repressor GATA binding 1 [Source:HGNC Symbol;Acc:HGNC:12340]
ENSG00000104611	SH2D4A	278.867	-0.334259	0.115603	-2.89144	0.00383478	0.0438296	Sig. genes		SH2 domain containing 4A [Source:HGNC Symbol;Acc:HGNC:26102]
ENSG00000104687	GSR	301.155	0.325656	0.106517	3.05731	0.00223333	0.0296508	Sig. genes		glutathione-disulfide reductase [Source:HGNC Symbol;Acc:HGNC:4623]
ENSG00000104765	BNIP3L	1197.67	0.391579	0.110716	3.53681	0.000404994	0.00792727	Sig. genes		BCL2 interacting protein 3 like [Source:HGNC Symbol;Acc:HGNC:1085]
ENSG00000104881	PPP1R13L	218.298	0.790261	0.175029	4.51502	6.33108e-06	0.000255382	Sig. genes		protein phosphatase 1 regulatory subunit 13 like [Source:HGNC Symbol;Acc:HGNC:18838]
ENSG00000105193	RPS16	6718.03	0.191159	0.0496802	3.8478	0.000119182	0.00306971	Sig. genes		ribosomal protein S16 [Source:HGNC Symbol;Acc:HGNC:10396]
ENSG00000105219	CCNP	54.9056	-2.22599	0.313048	-7.11071	1.15445e-12	2.46144e-10	Sig. genes		cyclin P [Source:HGNC Symbol;Acc:HGNC:25805]
ENSG00000105220	GPI	1296.54	-0.187626	0.0563489	-3.32971	0.00086936	0.014324	Sig. genes		glucose-6-phosphate isomerase [Source:HGNC Symbol;Acc:HGNC:4458]
ENSG00000105221	AKT2	570.078	-0.353196	0.0722632	-4.88764	1.02054e-06	5.29796e-05	Sig. genes		AKT serine/threonine kinase 2 [Source:HGNC Symbol;Acc:HGNC:392]
ENSG00000105281	SLC1A5	355.254	0.379331	0.108376	3.50014	0.000465014	0.00886	Sig. genes		solute carrier family 1 member 5 [Source:HGNC Symbol;Acc:HGNC:10943]
ENSG00000105655	ISYNA1	55.6981	-0.684937	0.171444	-3.99512	6.46621e-05	0.00188923	Sig. genes		inositol-3-phosphate synthase 1 [Source:HGNC Symbol;Acc:HGNC:29821]
ENSG00000105722	ERF	44.1386	-0.547418	0.158296	-3.45819	0.00054381	0.00987246	Sig. genes		ETS2 repressor factor [Source:HGNC Symbol;Acc:HGNC:3444]
ENSG00000105750	ZNF85	8.72409	1.92172	0.532265	3.61046	0.000305657	0.0063729	Sig. genes		zinc finger protein 85 [Source:HGNC Symbol;Acc:HGNC:13160]
ENSG00000105825	TFPI2	200.672	2.05196	0.244607	8.3888	4.91149e-17	2.14548e-14	Sig. genes		tissue factor pathway inhibitor 2 [Source:HGNC Symbol;Acc:HGNC:11761]
ENSG00000105928	GSDME	119.201	0.597087	0.149172	4.00268	6.263e-05	0.001851	Sig. genes		gasdermin E [Source:HGNC Symbol;Acc:HGNC:2810]
ENSG00000105953	OGDH	227.288	-0.240798	0.0789794	-3.04887	0.00229702	0.030272	Sig. genes
ENSG00000105974	CAV1	983.086	-0.318127	0.09811	-3.24255	0.00118465	0.0181653	Sig. genes		caveolin 1 [Source:HGNC Symbol;Acc:HGNC:1527]
ENSG00000106066	CPVL	342.383	0.625892	0.138271	4.52655	5.99535e-06	0.000244038	Sig. genes		carboxypeptidase vitellogenic like [Source:HGNC Symbol;Acc:HGNC:14399]
ENSG00000106070	GRB10	128.01	0.77628	0.20247	3.83405	0.000126052	0.00320681	Sig. genes		growth factor receptor bound protein 10 [Source:HGNC Symbol;Acc:HGNC:4564]
ENSG00000106077	ABHD11	81.6762	-0.420367	0.140884	-2.98378	0.00284711	0.0351823	Sig. genes		abhydrolase domain containing 11 [Source:HGNC Symbol;Acc:HGNC:16407]
ENSG00000106105	GARS1	645.767	0.517135	0.114642	4.51085	6.45671e-06	0.000258942	Sig. genes		glycyl-tRNA synthetase 1 [Source:HGNC Symbol;Acc:HGNC:4162]
ENSG00000106133	NSUN5P2	147.192	-0.445358	0.0903011	-4.93192	8.14247e-07	4.36622e-05	Sig. genes		NSUN5 pseudogene 2 [Source:HGNC Symbol;Acc:HGNC:16609]
ENSG00000106153	CHCHD2	2965.34	-0.157825	0.052301	-3.01764	0.00254752	0.0326134	Sig. genes		coiled-coil-helix-coiled-coil-helix domain containing 2 [Source:HGNC Symbol;Acc:HGNC:21645]
ENSG00000106328	FSCN3	238.531	-0.368474	0.104264	-3.53403	0.000409275	0.00798406	Sig. genes		fascin actin-bundling protein 3 [Source:HGNC Symbol;Acc:HGNC:3961]
ENSG00000106333	PCOLCE	1257.45	-1.03235	0.146859	-7.02956	2.07186e-12	4.16932e-10	Sig. genes		procollagen C-endopeptidase enhancer [Source:HGNC Symbol;Acc:HGNC:8738]
ENSG00000106336	FBXO24	5.25529	-1.92065	0.610667	-3.14516	0.00165994	0.0237647	Sig. genes		F-box protein 24 [Source:HGNC Symbol;Acc:HGNC:13595]
ENSG00000106366	SERPINE1	1135.4	2.90334	0.175057	16.5851	8.93365e-62	1.60002e-57	Sig. genes		serpin family E member 1 [Source:HGNC Symbol;Acc:HGNC:8583]
ENSG00000106484	MEST	82.1375	1.17777	0.218354	5.39384	6.89684e-08	4.98074e-06	Sig. genes		mesoderm specific transcript [Source:HGNC Symbol;Acc:HGNC:7028]
ENSG00000106536	POU6F2	838.413	-0.930004	0.154028	-6.03789	1.56143e-09	1.71566e-07	Sig. genes		POU class 6 homeobox 2 [Source:HGNC Symbol;Acc:HGNC:21694]
ENSG00000106571	GLI3	467.326	-0.548006	0.192612	-2.84513	0.00443937	0.0487487	Sig. genes		GLI family zinc finger 3 [Source:HGNC Symbol;Acc:HGNC:4319]
ENSG00000106624	AEBP1	724.844	0.991777	0.186072	5.33007	9.81762e-08	6.8685e-06	Sig. genes		AE binding protein 1 [Source:HGNC Symbol;Acc:HGNC:303]
ENSG00000106682	EIF4H	484.241	0.377926	0.0891633	4.23858	2.24935e-05	0.000765795	Sig. genes		eukaryotic translation initiation factor 4H [Source:HGNC Symbol;Acc:HGNC:12741]
ENSG00000106683	LIMK1	235.552	1.0679	0.125476	8.51079	1.72752e-17	8.36213e-15	Sig. genes		LIM domain kinase 1 [Source:HGNC Symbol;Acc:HGNC:6613]
ENSG00000106799	TGFBR1	212.327	0.526546	0.124947	4.21414	2.50729e-05	0.000837789	Sig. genes		transforming growth factor beta receptor 1 [Source:HGNC Symbol;Acc:HGNC:11772]
ENSG00000107036	RIC1	159.053	0.51592	0.158097	3.26332	0.00110113	0.0171341	Sig. genes		RIC1 homolog, RAB6A GEF complex partner 1 [Source:HGNC Symbol;Acc:HGNC:17686]
ENSG00000107242	PIP5K1B	275.625	-1.07037	0.180172	-5.94082	2.83607e-09	3.00556e-07	Sig. genes		phosphatidylinositol-4-phosphate 5-kinase type 1 beta [Source:HGNC Symbol;Acc:HGNC:8995]
ENSG00000107263	RAPGEF1	568.967	-0.318678	0.0860305	-3.70424	0.000212024	0.00483739	Sig. genes		Rap guanine nucleotide exchange factor 1 [Source:HGNC Symbol;Acc:HGNC:4568]
ENSG00000107317	PTGDS	7862.98	-1.27285	0.152327	-8.35606	6.4849e-17	2.76535e-14	Sig. genes	Endo_marker	prostaglandin D2 synthase [Source:HGNC Symbol;Acc:HGNC:9592]
ENSG00000107362	ABHD17B	118.756	-0.537597	0.148723	-3.61475	0.000300636	0.00634203	Sig. genes		abhydrolase domain containing 17B, depalmitoylase [Source:HGNC Symbol;Acc:HGNC:24278]
ENSG00000107611	CUBN	28.4652	-1.5967	0.525117	-3.04066	0.00236057	0.0309275	Sig. genes		cubilin [Source:HGNC Symbol;Acc:HGNC:2548]
ENSG00000107669	ATE1	138.128	-0.741819	0.255952	-2.89827	0.00375224	0.0431947	Sig. genes
ENSG00000107742	SPOCK2	340.827	0.658686	0.128677	5.11892	3.07294e-07	1.84686e-05	Sig. genes
ENSG00000107771	CCSER2	257.362	0.52264	0.129201	4.04516	5.22865e-05	0.0015899	Sig. genes		coiled-coil serine rich protein 2 [Source:HGNC Symbol;Acc:HGNC:29197]
ENSG00000107864	CPEB3	90.7591	-0.625231	0.172905	-3.61604	0.000299145	0.00631803	Sig. genes		cytoplasmic polyadenylation element binding protein 3 [Source:HGNC Symbol;Acc:HGNC:21746]
ENSG00000107902	LHPP	25.0087	-0.974907	0.279102	-3.49301	0.000477606	0.00903643	Sig. genes		phospholysine phosphohistidine inorganic pyrophosphate phosphatase [Source:HGNC Symbol;Acc:HGNC:30042]
ENSG00000107984	DKK1	4.5805	2.41814	0.77418	3.12348	0.00178726	0.025165	Sig. genes		dickkopf WNT signaling pathway inhibitor 1 [Source:HGNC Symbol;Acc:HGNC:2891]
ENSG00000108107	RPL28	2295.8	0.357646	0.0578501	6.18229	6.31781e-10	7.75013e-08	Sig. genes		ribosomal protein L28 [Source:HGNC Symbol;Acc:HGNC:10330]
ENSG00000108312	UBTF	289.552	-0.448723	0.127989	-3.50596	0.000454972	0.00871502	Sig. genes		upstream binding transcription factor [Source:HGNC Symbol;Acc:HGNC:12511]
ENSG00000108370	RGS9	355.201	0.585213	0.162221	3.60751	0.000309147	0.00643068	Sig. genes		regulator of G protein signaling 9 [Source:HGNC Symbol;Acc:HGNC:10004]
ENSG00000108387	SEPTIN4	72.1826	-0.737714	0.194357	-3.79566	0.000147254	0.0036427	Sig. genes		septin 4 [Source:HGNC Symbol;Acc:HGNC:9165]
ENSG00000108448	TRIM16L	114.217	1.02851	0.187859	5.47489	4.37782e-08	3.3651e-06	Sig. genes
ENSG00000108518	PFN1	334.056	0.361696	0.117324	3.08289	0.00205002	0.0277222	Sig. genes		profilin 1 [Source:HGNC Symbol;Acc:HGNC:8881]
ENSG00000108528	SLC25A11	262.638	-0.391002	0.0941305	-4.15383	3.26959e-05	0.00107054	Sig. genes		solute carrier family 25 member 11 [Source:HGNC Symbol;Acc:HGNC:10981]
ENSG00000108669	CYTH1	169.31	0.412738	0.118175	3.49259	0.000478358	0.00903643	Sig. genes
ENSG00000108679	LGALS3BP	580.175	-0.349665	0.0915971	-3.81743	0.00013485	0.00338732	Sig. genes		galectin 3 binding protein [Source:HGNC Symbol;Acc:HGNC:6564]
ENSG00000108797	CNTNAP1	98.1556	-0.559911	0.149849	-3.7365	0.000186602	0.00438014	Sig. genes		contactin associated protein 1 [Source:HGNC Symbol;Acc:HGNC:8011]
ENSG00000108821	COL1A1	385.094	1.08448	0.215027	5.04347	4.57159e-07	2.6412e-05	Sig. genes		collagen type I alpha 1 chain [Source:HGNC Symbol;Acc:HGNC:2197]
ENSG00000108823	SGCA	8.98677	1.42282	0.437856	3.24951	0.00115605	0.0178799	Sig. genes		sarcoglycan alpha [Source:HGNC Symbol;Acc:HGNC:10805]
ENSG00000108828	VAT1	746.335	0.36524	0.0779598	4.68498	2.79985e-06	0.000123815	Sig. genes		vesicle amine transport 1 [Source:HGNC Symbol;Acc:HGNC:16919]
ENSG00000108829	LRRC59	248.307	0.352652	0.097249	3.62628	0.000287535	0.00612337	Sig. genes		leucine rich repeat containing 59 [Source:HGNC Symbol;Acc:HGNC:28817]
ENSG00000108830	RND2	67.8774	-0.56703	0.173206	-3.27373	0.0010614	0.0166605	Sig. genes		Rho family GTPase 2 [Source:HGNC Symbol;Acc:HGNC:18315]
ENSG00000108846	ABCC3	336.137	1.21096	0.211278	5.73159	9.94923e-09	8.90953e-07	Sig. genes		ATP binding cassette subfamily C member 3 [Source:HGNC Symbol;Acc:HGNC:54]
ENSG00000108854	SMURF2	397.122	0.632178	0.166549	3.79574	0.000147202	0.0036427	Sig. genes		SMAD specific E3 ubiquitin protein ligase 2 [Source:HGNC Symbol;Acc:HGNC:16809]
ENSG00000108883	EFTUD2	395.33	-0.631602	0.111254	-5.6771	1.37e-08	1.18535e-06	Sig. genes		elongation factor Tu GTP binding domain containing 2 [Source:HGNC Symbol;Acc:HGNC:30858]
ENSG00000108924	HLF	99.9543	-0.54539	0.185178	-2.94523	0.00322718	0.0385069	Sig. genes		HLF transcription factor, PAR bZIP family member [Source:HGNC Symbol;Acc:HGNC:4977]
ENSG00000108946	PRKAR1A	1746.96	-0.298904	0.0815535	-3.66513	0.00024721	0.00547962	Sig. genes
ENSG00000109016	DHRS7B	83.4042	-0.453635	0.134959	-3.36129	0.000775802	0.0131205	Sig. genes
ENSG00000109107	ALDOC	256.721	-0.446023	0.101069	-4.41304	1.01929e-05	0.000395141	Sig. genes		aldolase, fructose-bisphosphate C [Source:HGNC Symbol;Acc:HGNC:418]
ENSG00000109381	ELF2	357.337	-0.486039	0.0993645	-4.89147	1.00083e-06	5.21072e-05	Sig. genes
ENSG00000109654	TRIM2	613.025	-0.225649	0.0697556	-3.23486	0.00121703	0.0185348	Sig. genes		tripartite motif containing 2 [Source:HGNC Symbol;Acc:HGNC:15974]
ENSG00000109814	UGDH	170.339	0.593903	0.133694	4.44225	8.90231e-06	0.00034965	Sig. genes		UDP-glucose 6-dehydrogenase [Source:HGNC Symbol;Acc:HGNC:12525]
ENSG00000109832	DDX25	47.8345	-0.513701	0.179523	-2.86147	0.00421675	0.0469664	Sig. genes		DEAD-box helicase 25 [Source:HGNC Symbol;Acc:HGNC:18698]
ENSG00000109929	SC5D	342.206	0.351715	0.113759	3.09175	0.00198979	0.0271211	Sig. genes		sterol-C5-desaturase [Source:HGNC Symbol;Acc:HGNC:10547]
ENSG00000110002	VWA5A	341.439	-0.332066	0.11477	-2.89333	0.00381183	0.043658	Sig. genes		von Willebrand factor A domain containing 5A [Source:HGNC Symbol;Acc:HGNC:6658]
ENSG00000110013	SIAE	86.5906	-0.592715	0.164621	-3.60048	0.000317625	0.00656132	Sig. genes		sialic acid acetylesterase [Source:HGNC Symbol;Acc:HGNC:18187]
ENSG00000110092	CCND1	908.692	1.23261	0.128799	9.57003	1.0687e-21	7.97521e-19	Sig. genes		cyclin D1 [Source:HGNC Symbol;Acc:HGNC:1582]
ENSG00000110318	CEP126	402.856	-0.326346	0.106004	-3.07861	0.00207969	0.0280266	Sig. genes		centrosomal protein 126 [Source:HGNC Symbol;Acc:HGNC:29264]
ENSG00000110455	ACCS	63.7576	-0.555862	0.194298	-2.86087	0.00422483	0.0469979	Sig. genes		1-aminocyclopropane-1-carboxylate synthase homolog (inactive) [Source:HGNC Symbol;Acc:HGNC:23989]
ENSG00000110492	MDK	223.559	0.479486	0.0978872	4.89836	9.66411e-07	5.06094e-05	Sig. genes
ENSG00000110651	CD81	3085.41	-0.416736	0.0763591	-5.45758	4.82664e-08	3.67851e-06	Sig. genes		CD81 molecule [Source:HGNC Symbol;Acc:HGNC:1701]
ENSG00000110693	SOX6	27.718	1.09506	0.308597	3.54852	0.000387402	0.00767519	Sig. genes		SRY-box transcription factor 6 [Source:HGNC Symbol;Acc:HGNC:16421]
ENSG00000110719	TCIRG1	55.0335	-1.03473	0.335542	-3.08375	0.00204409	0.0277137	Sig. genes		T cell immune regulator 1, ATPase H+ transporting V0 subunit a3 [Source:HGNC Symbol;Acc:HGNC:11647]
ENSG00000110955	ATP5F1B	1167.8	-0.320132	0.0589032	-5.43489	5.48317e-08	4.10894e-06	Sig. genes		ATP synthase F1 subunit beta [Source:HGNC Symbol;Acc:HGNC:830]
ENSG00000111057	KRT18	792.047	0.436302	0.123681	3.52764	0.000419287	0.00815357	Sig. genes		keratin 18 [Source:HGNC Symbol;Acc:HGNC:6430]
ENSG00000111077	TNS2	130.223	-0.384489	0.12403	-3.09996	0.00193547	0.0266239	Sig. genes		tensin 2 [Source:HGNC Symbol;Acc:HGNC:19737]
ENSG00000111145	ELK3	323.649	0.457909	0.128056	3.57584	0.000349104	0.00708894	Sig. genes		ETS transcription factor ELK3 [Source:HGNC Symbol;Acc:HGNC:3325]
ENSG00000111269	CREBL2	280.188	-0.248702	0.0702029	-3.54261	0.000396187	0.00780724	Sig. genes		cAMP responsive element binding protein like 2 [Source:HGNC Symbol;Acc:HGNC:2350]
ENSG00000111319	SCNN1A	318.185	-0.779522	0.159954	-4.87341	1.0969e-06	5.60171e-05	Sig. genes		sodium channel epithelial 1 subunit alpha [Source:HGNC Symbol;Acc:HGNC:10599]
ENSG00000111341	MGP	38573.8	-0.993031	0.177115	-5.60671	2.06205e-08	1.72576e-06	Sig. genes		matrix Gla protein [Source:HGNC Symbol;Acc:HGNC:7060]
ENSG00000111348	ARHGDIB	228.202	-0.789062	0.145823	-5.4111	6.26388e-08	4.54858e-06	Sig. genes		Rho GDP dissociation inhibitor beta [Source:HGNC Symbol;Acc:HGNC:679]
ENSG00000111371	SLC38A1	547.357	0.519215	0.102682	5.05653	4.26963e-07	2.48276e-05	Sig. genes		solute carrier family 38 member 1 [Source:HGNC Symbol;Acc:HGNC:13447]
ENSG00000111424	VDR	213.562	0.755817	0.160218	4.71742	2.3885e-06	0.000108299	Sig. genes		vitamin D receptor [Source:HGNC Symbol;Acc:HGNC:12679]
ENSG00000111596	CNOT2	422.498	-0.287827	0.0866377	-3.32219	0.000893141	0.014595	Sig. genes		CCR4-NOT transcription complex subunit 2 [Source:HGNC Symbol;Acc:HGNC:7878]
ENSG00000111666	CHPT1	156.803	0.56848	0.184406	3.08277	0.00205085	0.0277222	Sig. genes		choline phosphotransferase 1 [Source:HGNC Symbol;Acc:HGNC:17852]
ENSG00000111678	C12orf57	890.28	0.22098	0.0676429	3.26686	0.00108749	0.0169832	Sig. genes		chromosome 12 open reading frame 57 [Source:HGNC Symbol;Acc:HGNC:29521]
ENSG00000111775	COX6A1	1208.37	-0.240467	0.082393	-2.91853	0.0035168	0.0411092	Sig. genes		cytochrome c oxidase subunit 6A1 [Source:HGNC Symbol;Acc:HGNC:2277]
ENSG00000111817	DSE	295.884	0.775591	0.14386	5.39128	6.99574e-08	5.01175e-06	Sig. genes		dermatan sulfate epimerase [Source:HGNC Symbol;Acc:HGNC:21144]
ENSG00000111859	NEDD9	520.112	0.563017	0.1338	4.20791	2.57742e-05	0.000858022	Sig. genes		neural precursor cell expressed, developmentally down-regulated 9 [Source:HGNC Symbol;Acc:HGNC:7733]
ENSG00000111860	CEP85L	103.078	0.878952	0.202261	4.34563	1.38878e-05	0.000502485	Sig. genes		centrosomal protein 85 like [Source:HGNC Symbol;Acc:HGNC:21638]
ENSG00000111863	ADTRP	8.06592	1.78583	0.618958	2.88522	0.00391139	0.0443936	Sig. genes		androgen dependent TFPI regulating protein [Source:HGNC Symbol;Acc:HGNC:21214]
ENSG00000111879	FAM184A	22.5026	-1.14641	0.353586	-3.24223	0.00118596	0.0181699	Sig. genes		family with sequence similarity 184 member A [Source:HGNC Symbol;Acc:HGNC:20991]
ENSG00000111912	NCOA7	1984.24	-0.426078	0.122404	-3.48093	0.000499682	0.00928352	Sig. genes		nuclear receptor coactivator 7 [Source:HGNC Symbol;Acc:HGNC:21081]
ENSG00000111913	RIPOR2	407.857	-0.709563	0.161652	-4.38945	1.13638e-05	0.000428473	Sig. genes		RHO family interacting cell polarization regulator 2 [Source:HGNC Symbol;Acc:HGNC:13872]
ENSG00000111981	ULBP1	18.8586	1.44734	0.379195	3.81687	0.000135154	0.00339021	Sig. genes		UL16 binding protein 1 [Source:HGNC Symbol;Acc:HGNC:14893]
ENSG00000112146	FBXO9	637.953	-0.431118	0.106996	-4.02929	5.59462e-05	0.00167839	Sig. genes		F-box protein 9 [Source:HGNC Symbol;Acc:HGNC:13588]
ENSG00000112149	CD83	273.297	-1.163	0.160483	-7.24689	4.26466e-13	9.42963e-11	Sig. genes		CD83 molecule [Source:HGNC Symbol;Acc:HGNC:1703]
ENSG00000112159	MDN1	423.336	-0.365846	0.0745629	-4.90654	9.26985e-07	4.86871e-05	Sig. genes		midasin AAA ATPase 1 [Source:HGNC Symbol;Acc:HGNC:18302]
ENSG00000112164	GLP1R	34.6753	-1.08749	0.248992	-4.36756	1.25643e-05	0.000463973	Sig. genes		glucagon like peptide 1 receptor [Source:HGNC Symbol;Acc:HGNC:4324]
ENSG00000112186	CAP2	150.944	0.464982	0.135239	3.43821	0.000585569	0.0105191	Sig. genes
ENSG00000112232	KHDRBS2	14.4972	-1.09221	0.366842	-2.97734	0.00290759	0.0357247	Sig. genes		KH RNA binding domain containing, signal transduction associated 2 [Source:HGNC Symbol;Acc:HGNC:18114]
ENSG00000112242	E2F3	169.303	0.395309	0.101023	3.91307	9.11319e-05	0.00244703	Sig. genes
ENSG00000112305	SMAP1	327.171	0.323375	0.0869366	3.71966	0.00019949	0.00462807	Sig. genes		small ArfGAP 1 [Source:HGNC Symbol;Acc:HGNC:19651]
ENSG00000112343	TRIM38	439.043	0.340703	0.0845501	4.02959	5.58731e-05	0.00167839	Sig. genes		tripartite motif containing 38 [Source:HGNC Symbol;Acc:HGNC:10059]
ENSG00000112379	ARFGEF3	76.6604	0.46024	0.132213	3.48105	0.00049945	0.00928352	Sig. genes		ARFGEF family member 3 [Source:HGNC Symbol;Acc:HGNC:21213]
ENSG00000112576	CCND3	195.725	-0.500916	0.126444	-3.96157	7.4459e-05	0.00211676	Sig. genes		cyclin D3 [Source:HGNC Symbol;Acc:HGNC:1585]
ENSG00000112651	MRPL2	75.4679	-0.435663	0.125383	-3.47467	0.000511486	0.00944403	Sig. genes		mitochondrial ribosomal protein L2 [Source:HGNC Symbol;Acc:HGNC:14056]
ENSG00000112655	PTK7	385.658	0.47986	0.0777926	6.16845	6.89606e-10	8.32573e-08	Sig. genes		protein tyrosine kinase 7 (inactive) [Source:HGNC Symbol;Acc:HGNC:9618]
ENSG00000112658	SRF	178.937	0.44823	0.153894	2.91259	0.00358444	0.0416325	Sig. genes		serum response factor [Source:HGNC Symbol;Acc:HGNC:11291]
ENSG00000112667	DNPH1	277.447	-0.310465	0.103911	-2.98781	0.00280989	0.0350209	Sig. genes		2'-deoxynucleoside 5'-phosphate N-hydrolase 1 [Source:HGNC Symbol;Acc:HGNC:21218]
ENSG00000112695	COX7A2	965.963	-0.293007	0.0748703	-3.91353	9.09567e-05	0.00244703	Sig. genes
ENSG00000112699	GMDS	324.242	-0.350643	0.1026	-3.41757	0.000631833	0.011127	Sig. genes		GDP-mannose 4,6-dehydratase [Source:HGNC Symbol;Acc:HGNC:4369]
ENSG00000112759	SLC29A1	510.477	0.484216	0.138983	3.48399	0.000493995	0.0092161	Sig. genes		solute carrier family 29 member 1 (Augustine blood group) [Source:HGNC Symbol;Acc:HGNC:11003]
ENSG00000112877	CEP72	7.33512	1.63476	0.566498	2.88574	0.00390499	0.0443569	Sig. genes		centrosomal protein 72 [Source:HGNC Symbol;Acc:HGNC:25547]
ENSG00000112964	GHR	48.7417	-0.798681	0.241575	-3.30614	0.000945915	0.015235	Sig. genes		growth hormone receptor [Source:HGNC Symbol;Acc:HGNC:4263]
ENSG00000113070	HBEGF	221.985	1.04862	0.208603	5.02687	4.98561e-07	2.86193e-05	Sig. genes		heparin binding EGF like growth factor [Source:HGNC Symbol;Acc:HGNC:3059]
ENSG00000113083	LOX	85.0351	1.84551	0.327344	5.63783	1.7221e-08	1.46175e-06	Sig. genes		lysyl oxidase [Source:HGNC Symbol;Acc:HGNC:6664]
ENSG00000113140	SPARC	2477.07	0.655493	0.108408	6.04652	1.48009e-09	1.63632e-07	Sig. genes		secreted protein acidic and cysteine rich [Source:HGNC Symbol;Acc:HGNC:11219]
ENSG00000113161	HMGCR	142.595	0.802687	0.271193	2.95984	0.00307799	0.0372307	Sig. genes		3-hydroxy-3-methylglutaryl-CoA reductase [Source:HGNC Symbol;Acc:HGNC:5006]
ENSG00000113296	THBS4	56.0016	-0.7189	0.173782	-4.13678	3.52207e-05	0.00114691	Sig. genes		thrombospondin 4 [Source:HGNC Symbol;Acc:HGNC:11788]
ENSG00000113369	ARRDC3	513.551	0.404929	0.098999	4.09024	4.30928e-05	0.00136647	Sig. genes		arrestin domain containing 3 [Source:HGNC Symbol;Acc:HGNC:29263]
ENSG00000113384	GOLPH3	192.306	0.290141	0.0919935	3.15393	0.0016109	0.0231854	Sig. genes		golgi phosphoprotein 3 [Source:HGNC Symbol;Acc:HGNC:15452]
ENSG00000113389	NPR3	373.194	0.716575	0.183822	3.8982	9.69103e-05	0.00259054	Sig. genes		natriuretic peptide receptor 3 [Source:HGNC Symbol;Acc:HGNC:7945]
ENSG00000113396	SLC27A6	11.194	1.55881	0.49372	3.15728	0.00159246	0.0229822	Sig. genes		solute carrier family 27 member 6 [Source:HGNC Symbol;Acc:HGNC:11000]
ENSG00000113552	GNPDA1	540.868	0.266131	0.0762119	3.49198	0.000479451	0.00903643	Sig. genes		glucosamine-6-phosphate deaminase 1 [Source:HGNC Symbol;Acc:HGNC:4417]
ENSG00000113648	MACROH2A1	463.712	-0.291335	0.0826471	-3.52505	0.000423395	0.00821561	Sig. genes
ENSG00000113657	DPYSL3	1627.14	-0.319821	0.111044	-2.88014	0.00397497	0.0448849	Sig. genes		dihydropyrimidinase like 3 [Source:HGNC Symbol;Acc:HGNC:3015]
ENSG00000113719	ERGIC1	551.198	-0.260265	0.0746158	-3.48807	0.000486517	0.00912778	Sig. genes
ENSG00000113739	STC2	2785.51	1.47072	0.255524	5.7557	8.62821e-09	7.84423e-07	Sig. genes		stanniocalcin 2 [Source:HGNC Symbol;Acc:HGNC:11374]
ENSG00000113916	BCL6	797.697	-0.606679	0.115966	-5.23154	1.68102e-07	1.09083e-05	Sig. genes		BCL6 transcription repressor [Source:HGNC Symbol;Acc:HGNC:1001]
ENSG00000114023	FAM162A	541.285	-0.245534	0.0854229	-2.87433	0.00404883	0.0454637	Sig. genes
ENSG00000114166	KAT2B	72.7431	-1.13832	0.237657	-4.78975	1.66993e-06	7.95436e-05	Sig. genes		lysine acetyltransferase 2B [Source:HGNC Symbol;Acc:HGNC:8638]
ENSG00000114268	PFKFB4	64.3145	0.618353	0.213962	2.89001	0.00385229	0.0440017	Sig. genes		6-phosphofructo-2-kinase/fructose-2,6-biphosphatase 4 [Source:HGNC Symbol;Acc:HGNC:8875]
ENSG00000114270	COL7A1	228.467	1.04324	0.176395	5.91423	3.33435e-09	3.39308e-07	Sig. genes		collagen type VII alpha 1 chain [Source:HGNC Symbol;Acc:HGNC:2214]
ENSG00000114378	HYAL1	83.7585	-0.689585	0.193868	-3.55698	0.000375144	0.00750434	Sig. genes		hyaluronidase 1 [Source:HGNC Symbol;Acc:HGNC:5320]
ENSG00000114391	RPL24	3312.22	0.17378	0.0476452	3.64739	0.000264922	0.00572346	Sig. genes		ribosomal protein L24 [Source:HGNC Symbol;Acc:HGNC:10325]
ENSG00000114480	GBE1	383.759	0.554783	0.138163	4.01541	5.93415e-05	0.00176546	Sig. genes		1,4-alpha-glucan branching enzyme 1 [Source:HGNC Symbol;Acc:HGNC:4180]
ENSG00000114541	FRMD4B	362.811	-0.511517	0.135729	-3.76867	0.000164121	0.00394898	Sig. genes		FERM domain containing 4B [Source:HGNC Symbol;Acc:HGNC:24886]
ENSG00000114573	ATP6V1A	494.672	-0.322896	0.104363	-3.09396	0.00197502	0.0269814	Sig. genes		ATPase H+ transporting V1 subunit A [Source:HGNC Symbol;Acc:HGNC:851]
ENSG00000114770	ABCC5	170.94	-0.468599	0.160641	-2.91706	0.00353352	0.0412547	Sig. genes		ATP binding cassette subfamily C member 5 [Source:HGNC Symbol;Acc:HGNC:56]
ENSG00000114805	PLCH1	30.9258	-1.40947	0.372585	-3.78295	0.00015498	0.0037816	Sig. genes		phospholipase C eta 1 [Source:HGNC Symbol;Acc:HGNC:29185]
ENSG00000114850	SSR3	1076.44	0.544705	0.0881852	6.17683	6.53996e-10	7.96807e-08	Sig. genes		signal sequence receptor subunit 3 [Source:HGNC Symbol;Acc:HGNC:11325]
ENSG00000114861	FOXP1	1055.76	0.391292	0.129688	3.01717	0.00255145	0.0326404	Sig. genes
ENSG00000115091	ACTR3	302.291	0.280944	0.0966773	2.906	0.00366081	0.0423547	Sig. genes		actin related protein 3 [Source:HGNC Symbol;Acc:HGNC:170]
ENSG00000115112	TFCP2L1	19.1133	0.908084	0.31389	2.893	0.00381584	0.0436688	Sig. genes		transcription factor CP2 like 1 [Source:HGNC Symbol;Acc:HGNC:17925]
ENSG00000115183	TANC1	233.633	-0.5165	0.141425	-3.65212	0.000260086	0.00566683	Sig. genes		tetratricopeptide repeat, ankyrin repeat and coiled-coil containing 1 [Source:HGNC Symbol;Acc:HGNC:29364]
ENSG00000115255	REEP6	120.117	-1.30684	0.166363	-7.85538	3.98557e-15	1.34682e-12	Sig. genes		receptor accessory protein 6 [Source:HGNC Symbol;Acc:HGNC:30078]
ENSG00000115286	NDUFS7	277.461	-0.318092	0.0930349	-3.41907	0.000628365	0.0110986	Sig. genes
ENSG00000115310	RTN4	5269.68	0.441438	0.0634119	6.96145	3.36796e-12	6.55655e-10	Sig. genes
ENSG00000115380	EFEMP1	1758.94	0.451737	0.116117	3.89036	0.000100096	0.00265731	Sig. genes		EGF containing fibulin extracellular matrix protein 1 [Source:HGNC Symbol;Acc:HGNC:3218]
ENSG00000115414	FN1	995.87	1.19631	0.182343	6.5608	5.3521e-11	8.05514e-09	Sig. genes		fibronectin 1 [Source:HGNC Symbol;Acc:HGNC:3778]
ENSG00000115641	FHL2	853.892	0.446018	0.0934081	4.77494	1.79765e-06	8.38433e-05	Sig. genes		four and a half LIM domains 2 [Source:HGNC Symbol;Acc:HGNC:3703]
ENSG00000115756	HPCAL1	207.761	-0.397912	0.114191	-3.48461	0.000492849	0.00920429	Sig. genes		hippocalcin like 1 [Source:HGNC Symbol;Acc:HGNC:5145]
ENSG00000115758	ODC1	181.405	0.921832	0.198989	4.63257	3.61151e-06	0.000154005	Sig. genes		ornithine decarboxylase 1 [Source:HGNC Symbol;Acc:HGNC:8109]
ENSG00000115762	PLEKHB2	664.302	0.22107	0.0758285	2.91539	0.0035524	0.0413654	Sig. genes
ENSG00000115839	RAB3GAP1	473.146	0.226748	0.0654554	3.46416	0.000531885	0.00973375	Sig. genes
ENSG00000115902	SLC1A4	159.445	0.514058	0.120685	4.25949	2.04896e-05	0.000713949	Sig. genes		solute carrier family 1 member 4 [Source:HGNC Symbol;Acc:HGNC:10942]
ENSG00000115944	COX7A2L	355.356	0.221618	0.0769794	2.87892	0.00399041	0.0449769	Sig. genes		cytochrome c oxidase subunit 7A2 like [Source:HGNC Symbol;Acc:HGNC:2289]
ENSG00000116005	PCYOX1	1653.17	-0.294721	0.0894467	-3.29494	0.000984443	0.0156445	Sig. genes		prenylcysteine oxidase 1 [Source:HGNC Symbol;Acc:HGNC:20588]
ENSG00000116183	PAPPA2	45.3758	1.49099	0.406382	3.66893	0.00024357	0.00541904	Sig. genes		pappalysin 2 [Source:HGNC Symbol;Acc:HGNC:14615]
ENSG00000116260	QSOX1	657.005	0.35155	0.114771	3.06307	0.00219082	0.0291947	Sig. genes		quiescin sulfhydryl oxidase 1 [Source:HGNC Symbol;Acc:HGNC:9756]
ENSG00000116285	ERRFI1	212.949	0.415857	0.137169	3.0317	0.00243178	0.0315603	Sig. genes		ERBB receptor feedback inhibitor 1 [Source:HGNC Symbol;Acc:HGNC:18185]
ENSG00000116584	ARHGEF2	199.18	0.651976	0.168128	3.87785	0.000105384	0.00276748	Sig. genes
ENSG00000116661	FBXO2	376.578	-0.342348	0.114741	-2.98365	0.00284837	0.0351823	Sig. genes		F-box protein 2 [Source:HGNC Symbol;Acc:HGNC:13581]
ENSG00000116679	IVNS1ABP	435.915	0.750123	0.166266	4.51159	6.43449e-06	0.000258942	Sig. genes		influenza virus NS1A binding protein [Source:HGNC Symbol;Acc:HGNC:16951]
ENSG00000116688	MFN2	469.222	-0.32375	0.0946175	-3.42168	0.000622363	0.0110252	Sig. genes		mitofusin 2 [Source:HGNC Symbol;Acc:HGNC:16877]
ENSG00000116690	PRG4	40.0948	2.31168	0.554312	4.17036	3.04125e-05	0.00100126	Sig. genes		proteoglycan 4 [Source:HGNC Symbol;Acc:HGNC:9364]
ENSG00000116717	GADD45A	421.248	0.92598	0.136444	6.78654	1.14857e-11	2.07786e-09	Sig. genes		growth arrest and DNA damage inducible alpha [Source:HGNC Symbol;Acc:HGNC:4095]
ENSG00000116729	WLS	657.562	-0.396665	0.132506	-2.99356	0.00275739	0.0346074	Sig. genes		Wnt ligand secretion mediator [Source:HGNC Symbol;Acc:HGNC:30238]
ENSG00000116954	RRAGC	927.386	0.21786	0.0545069	3.99692	6.41719e-05	0.00188413	Sig. genes		Ras related GTP binding C [Source:HGNC Symbol;Acc:HGNC:19902]
ENSG00000116996	ZP4	73.5828	-1.05287	0.341818	-3.0802	0.00206859	0.027919	Sig. genes		zona pellucida glycoprotein 4 [Source:HGNC Symbol;Acc:HGNC:15770]
ENSG00000117122	MFAP2	26.9142	0.861386	0.217769	3.9555	7.63761e-05	0.00215299	Sig. genes		microfibril associated protein 2 [Source:HGNC Symbol;Acc:HGNC:7033]
ENSG00000117298	ECE1	314.023	0.36396	0.104594	3.47975	0.000501879	0.00931466	Sig. genes		endothelin converting enzyme 1 [Source:HGNC Symbol;Acc:HGNC:3146]
ENSG00000117305	HMGCL	118.018	-0.360507	0.108798	-3.31356	0.000921167	0.014934	Sig. genes		3-hydroxy-3-methylglutaryl-CoA lyase [Source:HGNC Symbol;Acc:HGNC:5005]
ENSG00000117385	P3H1	142.917	0.69097	0.0891889	7.74727	9.38919e-15	2.95018e-12	Sig. genes		prolyl 3-hydroxylase 1 [Source:HGNC Symbol;Acc:HGNC:19316]
ENSG00000117505	DR1	166.429	-0.509986	0.165432	-3.08276	0.00205091	0.0277222	Sig. genes		down-regulator of transcription 1 [Source:HGNC Symbol;Acc:HGNC:3017]
ENSG00000117519	CNN3	453.873	0.552383	0.100449	5.49913	3.81662e-08	2.97199e-06	Sig. genes		calponin 3 [Source:HGNC Symbol;Acc:HGNC:2157]
ENSG00000117525	F3	40.1899	1.08341	0.327752	3.30558	0.00094781	0.0152518	Sig. genes		coagulation factor III, tissue factor [Source:HGNC Symbol;Acc:HGNC:3541]
ENSG00000117592	PRDX6	1050.35	0.318462	0.0909956	3.49975	0.000465697	0.00886358	Sig. genes		peroxiredoxin 6 [Source:HGNC Symbol;Acc:HGNC:16753]
ENSG00000117640	MTFR1L	198.683	-0.279856	0.097208	-2.87894	0.00399014	0.0449769	Sig. genes		mitochondrial fission regulator 1 like [Source:HGNC Symbol;Acc:HGNC:28836]
ENSG00000117862	TXNDC12	354.863	0.37752	0.0777421	4.85606	1.19746e-06	5.99063e-05	Sig. genes		thioredoxin domain containing 12 [Source:HGNC Symbol;Acc:HGNC:24626]
ENSG00000117984	CTSD	4219.76	0.260703	0.0868681	3.00114	0.00268974	0.0339967	Sig. genes		cathepsin D [Source:HGNC Symbol;Acc:HGNC:2529]
ENSG00000118181	RPS25	3201.82	0.166808	0.0450798	3.70028	0.000215363	0.00489486	Sig. genes		ribosomal protein S25 [Source:HGNC Symbol;Acc:HGNC:10413]
ENSG00000118194	TNNT2	54.1272	1.61263	0.346293	4.65682	3.21136e-06	0.000139601	Sig. genes
ENSG00000118263	KLF7	75.7632	0.643421	0.222724	2.88887	0.00386624	0.0441172	Sig. genes		Kruppel like factor 7 [Source:HGNC Symbol;Acc:HGNC:6350]
ENSG00000118307	CFAP94	42.3078	-0.996975	0.333772	-2.987	0.00281732	0.0350414	Sig. genes		dynein axonemal intermediate chain 7 [Source:HGNC Symbol;Acc:HGNC:29599]
ENSG00000118418	HMGN3	191.008	-0.465699	0.141285	-3.29618	0.000980098	0.015603	Sig. genes		high mobility group nucleosomal binding domain 3 [Source:HGNC Symbol;Acc:HGNC:12312]
ENSG00000118508	RAB32	100.588	0.538118	0.1689	3.18602	0.00144243	0.0213151	Sig. genes		RAB32, member RAS oncogene family [Source:HGNC Symbol;Acc:HGNC:9772]
ENSG00000118515	SGK1	387.434	-0.778503	0.141315	-5.50897	3.60931e-08	2.83521e-06	Sig. genes		serum/glucocorticoid regulated kinase 1 [Source:HGNC Symbol;Acc:HGNC:10810]
ENSG00000118523	CCN2	10148.5	2.12098	0.189101	11.2161	3.39932e-29	6.08819e-26	Sig. genes		cellular communication network factor 2 [Source:HGNC Symbol;Acc:HGNC:2500]
ENSG00000118640	VAMP8	328.616	-0.598035	0.108702	-5.50158	3.76393e-08	2.94376e-06	Sig. genes		vesicle associated membrane protein 8 [Source:HGNC Symbol;Acc:HGNC:12647]
ENSG00000118816	CCNI	3165.67	0.290399	0.0709538	4.09279	4.26206e-05	0.00135583	Sig. genes		cyclin I [Source:HGNC Symbol;Acc:HGNC:1595]
ENSG00000119280	C1orf198	247.436	0.685351	0.117065	5.85443	4.78655e-09	4.71028e-07	Sig. genes		chromosome 1 open reading frame 198 [Source:HGNC Symbol;Acc:HGNC:25900]
ENSG00000119408	NEK6	112.941	0.804389	0.218362	3.68374	0.000229838	0.00515839	Sig. genes		NIMA related kinase 6 [Source:HGNC Symbol;Acc:HGNC:7749]
ENSG00000119411	BSPRY	34.8728	-1.72019	0.29077	-5.91596	3.29943e-09	3.39308e-07	Sig. genes		B-box and SPRY domain containing [Source:HGNC Symbol;Acc:HGNC:18232]
ENSG00000119537	KDSR	1634.9	0.304912	0.0659891	4.62064	3.82562e-06	0.000161978	Sig. genes		3-ketodihydrosphingosine reductase [Source:HGNC Symbol;Acc:HGNC:4021]
ENSG00000119655	NPC2	2307.3	0.637572	0.0972887	6.5534	5.62425e-11	8.3942e-09	Sig. genes		NPC intracellular cholesterol transporter 2 [Source:HGNC Symbol;Acc:HGNC:14537]
ENSG00000119661	DNAL1	167.97	-0.53276	0.174681	-3.04991	0.00228913	0.0302348	Sig. genes		dynein axonemal light chain 1 [Source:HGNC Symbol;Acc:HGNC:23247]
ENSG00000119681	LTBP2	713.457	1.34767	0.131517	10.2472	1.21867e-24	1.45509e-21	Sig. genes		latent transforming growth factor beta binding protein 2 [Source:HGNC Symbol;Acc:HGNC:6715]
ENSG00000119729	RHOQ	1080.92	0.255768	0.0825446	3.09855	0.00194473	0.0266897	Sig. genes		ras homolog family member Q [Source:HGNC Symbol;Acc:HGNC:17736]
ENSG00000119922	IFIT2	330.991	-0.918891	0.197741	-4.64693	3.36905e-06	0.000144447	Sig. genes		interferon induced protein with tetratricopeptide repeats 2 [Source:HGNC Symbol;Acc:HGNC:5409]
ENSG00000120008	WDR11	144.805	0.431488	0.13157	3.27952	0.00103982	0.0163937	Sig. genes		WD repeat domain 11 [Source:HGNC Symbol;Acc:HGNC:13831]
ENSG00000120254	MTHFD1L	169.478	0.682587	0.188224	3.62646	0.000287331	0.00612337	Sig. genes		methylenetetrahydrofolate dehydrogenase (NADP+ dependent) 1 like [Source:HGNC Symbol;Acc:HGNC:21055]
ENSG00000120278	PLEKHG1	94.1355	-0.90268	0.188332	-4.79302	1.64286e-06	7.90957e-05	Sig. genes
ENSG00000120306	CYSTM1	187.224	0.310108	0.104671	2.96269	0.00304963	0.0370549	Sig. genes		cysteine rich transmembrane module containing 1 [Source:HGNC Symbol;Acc:HGNC:30239]
ENSG00000120549	KIAA1217	325.666	-0.646449	0.174311	-3.7086	0.000208409	0.00478802	Sig. genes
ENSG00000120647	CCDC77	28.5057	1.41924	0.42568	3.33404	0.000855941	0.0141944	Sig. genes		coiled-coil domain containing 77 [Source:HGNC Symbol;Acc:HGNC:28203]
ENSG00000120696	KBTBD7	81.779	-0.488127	0.125993	-3.87423	0.000106961	0.0028048	Sig. genes		kelch repeat and BTB domain containing 7 [Source:HGNC Symbol;Acc:HGNC:25266]
ENSG00000120708	TGFBI	4317.82	0.60512	0.199697	3.03018	0.00244404	0.0316735	Sig. genes		transforming growth factor beta induced [Source:HGNC Symbol;Acc:HGNC:11771]
ENSG00000120738	EGR1	479.622	0.727388	0.222021	3.27622	0.00105208	0.0165433	Sig. genes		early growth response 1 [Source:HGNC Symbol;Acc:HGNC:3238]
ENSG00000120802	TMPO	191.381	0.702035	0.148426	4.72987	2.24664e-06	0.000102409	Sig. genes		thymopoietin [Source:HGNC Symbol;Acc:HGNC:11875]
ENSG00000120820	GLT8D2	118.345	-0.602495	0.182456	-3.30213	0.000959531	0.0153439	Sig. genes		glycosyltransferase 8 domain containing 2 [Source:HGNC Symbol;Acc:HGNC:24890]
ENSG00000120833	SOCS2	46.6908	-1.06641	0.30156	-3.53631	0.000405764	0.00793365	Sig. genes		suppressor of cytokine signaling 2 [Source:HGNC Symbol;Acc:HGNC:19382]
ENSG00000120868	APAF1	48.9659	0.745691	0.262588	2.83977	0.00451458	0.0493454	Sig. genes		apoptotic peptidase activating factor 1 [Source:HGNC Symbol;Acc:HGNC:576]
ENSG00000120885	CLU	5700.88	-0.443094	0.149903	-2.95586	0.00311794	0.0375537	Sig. genes		clusterin [Source:HGNC Symbol;Acc:HGNC:2095]
ENSG00000121039	RDH10	124.675	-0.782875	0.139562	-5.6095	2.02914e-08	1.71424e-06	Sig. genes		retinol dehydrogenase 10 [Source:HGNC Symbol;Acc:HGNC:19975]
ENSG00000121068	TBX2	1185.16	-0.876822	0.118515	-7.39839	1.37845e-13	3.33621e-11	Sig. genes		T-box transcription factor 2 [Source:HGNC Symbol;Acc:HGNC:11597]
ENSG00000121281	ADCY7	141.383	0.48795	0.149078	3.27312	0.00106366	0.0166814	Sig. genes		adenylate cyclase 7 [Source:HGNC Symbol;Acc:HGNC:238]
ENSG00000121440	PDZRN3	181.894	-0.809736	0.166242	-4.87083	1.11129e-06	5.63832e-05	Sig. genes		PDZ domain containing ring finger 3 [Source:HGNC Symbol;Acc:HGNC:17704]
ENSG00000121671	CRY2	147.435	-0.323581	0.0892735	-3.6246	0.000289408	0.00615594	Sig. genes		cryptochrome circadian regulator 2 [Source:HGNC Symbol;Acc:HGNC:2385]
ENSG00000121904	CSMD2	113.73	-0.977131	0.343307	-2.84623	0.00442405	0.0486976	Sig. genes
ENSG00000122026	RPL21	6011.57	0.15231	0.043832	3.47487	0.000511104	0.00944403	Sig. genes		ribosomal protein L21 [Source:HGNC Symbol;Acc:HGNC:10313]
ENSG00000122033	MTIF3	283.265	-0.256591	0.0836322	-3.06809	0.00215433	0.0287941	Sig. genes		mitochondrial translational initiation factor 3 [Source:HGNC Symbol;Acc:HGNC:29788]
ENSG00000122254	HS3ST2	50.2773	1.19247	0.367367	3.24599	0.00117045	0.0179978	Sig. genes		heparan sulfate-glucosamine 3-sulfotransferase 2 [Source:HGNC Symbol;Acc:HGNC:5195]
ENSG00000122406	RPL5	7185.37	0.233541	0.0607106	3.84679	0.000119674	0.00307071	Sig. genes		ribosomal protein L5 [Source:HGNC Symbol;Acc:HGNC:10360]
ENSG00000122641	INHBA	304.249	0.786238	0.248132	3.16862	0.00153163	0.0222839	Sig. genes		inhibin subunit beta A [Source:HGNC Symbol;Acc:HGNC:6066]
ENSG00000122642	FKBP9	811.745	0.265489	0.0747859	3.54999	0.000385242	0.00764084	Sig. genes		FKBP prolyl isomerase 9 [Source:HGNC Symbol;Acc:HGNC:3725]
ENSG00000122694	GLIPR2	85.2131	0.89856	0.179121	5.01649	5.26248e-07	2.98263e-05	Sig. genes		GLI pathogenesis related 2 [Source:HGNC Symbol;Acc:HGNC:18007]
ENSG00000122786	CALD1	7172.68	0.53368	0.13483	3.95816	7.55309e-05	0.00213706	Sig. genes		caldesmon 1 [Source:HGNC Symbol;Acc:HGNC:1441]
ENSG00000122873	CISD1	397.428	-0.29473	0.0950433	-3.101	0.00192866	0.0265506	Sig. genes		CDGSH iron sulfur domain 1 [Source:HGNC Symbol;Acc:HGNC:30880]
ENSG00000122877	EGR2	5.83029	2.6393	0.763369	3.45744	0.000545335	0.00988558	Sig. genes
ENSG00000122884	P4HA1	670.991	0.324029	0.0896948	3.61257	0.000303177	0.00636772	Sig. genes		prolyl 4-hydroxylase subunit alpha 1 [Source:HGNC Symbol;Acc:HGNC:8546]
ENSG00000123119	NECAB1	287.974	-1.61224	0.17211	-9.36746	7.43007e-21	4.43575e-18	Sig. genes		N-terminal EF-hand calcium binding protein 1 [Source:HGNC Symbol;Acc:HGNC:20983]
ENSG00000123143	PKN1	45.0595	0.642188	0.212207	3.02623	0.00247622	0.0319748	Sig. genes		protein kinase N1 [Source:HGNC Symbol;Acc:HGNC:9405]
ENSG00000123243	ITIH5	41.0704	0.906362	0.217651	4.16429	3.12326e-05	0.00102638	Sig. genes		inter-alpha-trypsin inhibitor heavy chain 5 [Source:HGNC Symbol;Acc:HGNC:21449]
ENSG00000123737	EXOSC9	198.6	-0.392962	0.110848	-3.54506	0.000392522	0.00775946	Sig. genes		exosome component 9 [Source:HGNC Symbol;Acc:HGNC:9137]
ENSG00000123815	COQ8B	54.8223	-0.586045	0.187127	-3.13181	0.00173734	0.0246755	Sig. genes		coenzyme Q8B [Source:HGNC Symbol;Acc:HGNC:19041]
ENSG00000123908	AGO2	282.781	0.297981	0.0954077	3.12324	0.00178872	0.0251657	Sig. genes		argonaute RISC catalytic component 2 [Source:HGNC Symbol;Acc:HGNC:3263]
ENSG00000124006	OBSL1	248.888	-0.624255	0.214209	-2.91423	0.00356562	0.0414677	Sig. genes		obscurin like cytoskeletal adaptor 1 [Source:HGNC Symbol;Acc:HGNC:29092]
ENSG00000124098	FAM210B	1440.54	0.154291	0.0512847	3.00851	0.0026253	0.0332997	Sig. genes		family with sequence similarity 210 member B [Source:HGNC Symbol;Acc:HGNC:16102]
ENSG00000124205	EDN3	462.9	-1.2646	0.320275	-3.94849	7.86447e-05	0.00219397	Sig. genes		endothelin 3 [Source:HGNC Symbol;Acc:HGNC:3178]
ENSG00000124225	PMEPA1	404.657	2.08905	0.181416	11.5153	1.10528e-30	2.82793e-27	Sig. genes		prostate transmembrane protein, androgen induced 1 [Source:HGNC Symbol;Acc:HGNC:14107]
ENSG00000124422	USP22	887.385	0.201286	0.0463098	4.3465	1.38327e-05	0.000501505	Sig. genes		ubiquitin specific peptidase 22 [Source:HGNC Symbol;Acc:HGNC:12621]
ENSG00000124491	F13A1	28.6998	-1.16209	0.404005	-2.87641	0.00402224	0.0452502	Sig. genes		coagulation factor XIII A chain [Source:HGNC Symbol;Acc:HGNC:3531]
ENSG00000124496	TRERF1	26.7564	-0.949737	0.282322	-3.36402	0.00076817	0.0130283	Sig. genes
ENSG00000124766	SOX4	1444.8	1.24101	0.124109	9.99933	1.53436e-23	1.61649e-20	Sig. genes		SRY-box transcription factor 4 [Source:HGNC Symbol;Acc:HGNC:11200]
ENSG00000124785	NRN1	64.9333	-0.81905	0.223563	-3.66361	0.000248682	0.00549044	Sig. genes		neuritin 1 [Source:HGNC Symbol;Acc:HGNC:17972]
ENSG00000124839	RAB17	763.408	-1.07481	0.153014	-7.02424	2.15229e-12	4.28307e-10	Sig. genes		RAB17, member RAS oncogene family [Source:HGNC Symbol;Acc:HGNC:16523]
ENSG00000125144	MT1G	143.606	1.54787	0.308332	5.02013	5.16374e-07	2.93826e-05	Sig. genes		metallothionein 1G [Source:HGNC Symbol;Acc:HGNC:7399]
ENSG00000125148	MT2A	13074.7	0.978738	0.239983	4.07836	4.53538e-05	0.00142506	Sig. genes		metallothionein 2A [Source:HGNC Symbol;Acc:HGNC:7406]
ENSG00000125520	SLC2A4RG	206.079	0.320725	0.110073	2.91375	0.00357114	0.0415049	Sig. genes		SLC2A4 regulator [Source:HGNC Symbol;Acc:HGNC:15930]
ENSG00000125534	PPDPF	1044.77	0.789021	0.127484	6.18915	6.04891e-10	7.49888e-08	Sig. genes		pancreatic progenitor cell differentiation and proliferation factor [Source:HGNC Symbol;Acc:HGNC:16142]
ENSG00000125648	SLC25A23	307.476	-0.304875	0.0833142	-3.65934	0.000252861	0.00554314	Sig. genes		solute carrier family 25 member 23 [Source:HGNC Symbol;Acc:HGNC:19375]
ENSG00000125691	RPL23	7357.17	0.28773	0.0653721	4.40142	1.07544e-05	0.000411561	Sig. genes		ribosomal protein L23 [Source:HGNC Symbol;Acc:HGNC:10316]
ENSG00000125741	OPA3	138.078	-0.362008	0.104504	-3.46407	0.000532068	0.00973375	Sig. genes
ENSG00000125746	EML2	215.214	-0.29473	0.0986329	-2.98815	0.00280672	0.0350086	Sig. genes		EMAP like 2 [Source:HGNC Symbol;Acc:HGNC:18035]
ENSG00000125753	VASP	89.8892	0.422945	0.13165	3.21265	0.00131517	0.019744	Sig. genes		vasodilator stimulated phosphoprotein [Source:HGNC Symbol;Acc:HGNC:12652]
ENSG00000125834	STK35	187.956	-0.355342	0.117067	-3.03537	0.00240242	0.031361	Sig. genes		serine/threonine kinase 35 [Source:HGNC Symbol;Acc:HGNC:16254]
ENSG00000125843	AP5S1	68.8572	-0.392107	0.137801	-2.84547	0.00443465	0.0487267	Sig. genes		adaptor related protein complex 5 subunit sigma 1 [Source:HGNC Symbol;Acc:HGNC:15875]
ENSG00000125844	RRBP1	1026.23	0.400772	0.12586	3.18428	0.00145117	0.021364	Sig. genes
ENSG00000125885	MCM8	137.32	-0.687564	0.127496	-5.39283	6.93551e-08	4.98856e-06	Sig. genes		minichromosome maintenance 8 homologous recombination repair factor [Source:HGNC Symbol;Acc:HGNC:16147]
ENSG00000125901	MRPS26	287.634	-0.400373	0.102072	-3.92246	8.76486e-05	0.00238569	Sig. genes		mitochondrial ribosomal protein S26 [Source:HGNC Symbol;Acc:HGNC:14045]
ENSG00000125966	MMP24	65.0072	1.48583	0.33959	4.37537	1.21226e-05	0.000450627	Sig. genes		matrix metallopeptidase 24 [Source:HGNC Symbol;Acc:HGNC:7172]
ENSG00000125968	ID1	386.588	-0.661172	0.17077	-3.87172	0.000108072	0.0028241	Sig. genes		inhibitor of DNA binding 1, HLH protein [Source:HGNC Symbol;Acc:HGNC:5360]
ENSG00000125977	EIF2S2	2625.69	0.225965	0.07261	3.11203	0.00185804	0.0258567	Sig. genes		eukaryotic translation initiation factor 2 subunit beta [Source:HGNC Symbol;Acc:HGNC:3266]
ENSG00000126351	THRA	208.763	-0.507087	0.106048	-4.78168	1.73838e-06	8.15037e-05	Sig. genes		thyroid hormone receptor alpha [Source:HGNC Symbol;Acc:HGNC:11796]
ENSG00000126705	AHDC1	241.923	-0.419645	0.101755	-4.12409	3.72211e-05	0.00119898	Sig. genes		AT-hook DNA binding motif containing 1 [Source:HGNC Symbol;Acc:HGNC:25230]
ENSG00000126950	TMEM35A	15.2149	-1.27761	0.300905	-4.24589	2.17728e-05	0.000745604	Sig. genes		transmembrane protein 35A [Source:HGNC Symbol;Acc:HGNC:25864]
ENSG00000127084	FGD3	87.913	-1.40928	0.323407	-4.35761	1.31489e-05	0.000481497	Sig. genes		FYVE, RhoGEF and PH domain containing 3 [Source:HGNC Symbol;Acc:HGNC:16027]
ENSG00000127419	TMEM175	96.859	-0.498449	0.128148	-3.88964	0.000100394	0.00265985	Sig. genes		transmembrane protein 175 [Source:HGNC Symbol;Acc:HGNC:28709]
ENSG00000127838	PNKD	302.523	-0.360024	0.0770438	-4.67298	2.96867e-06	0.000129997	Sig. genes
ENSG00000127954	STEAP4	245.342	-0.53628	0.164193	-3.26615	0.0010902	0.0170082	Sig. genes		STEAP4 metalloreductase [Source:HGNC Symbol;Acc:HGNC:21923]
ENSG00000127990	SGCE	37.2503	0.987646	0.304273	3.24592	0.00117071	0.0179978	Sig. genes		sarcoglycan epsilon [Source:HGNC Symbol;Acc:HGNC:10808]
ENSG00000128045	RASL11B	25.999	1.48501	0.375102	3.95894	7.5282e-05	0.00213339	Sig. genes		RAS like family 11 member B [Source:HGNC Symbol;Acc:HGNC:23804]
ENSG00000128165	ADM2	30.2892	1.44482	0.38459	3.75678	0.000172113	0.00409912	Sig. genes		adrenomedullin 2 [Source:HGNC Symbol;Acc:HGNC:28898]
ENSG00000128285	MCHR1	69.4523	-1.58318	0.202413	-7.82155	5.21768e-15	1.73053e-12	Sig. genes
ENSG00000128342	LIF	33.8547	1.46069	0.302089	4.83529	1.3295e-06	6.54159e-05	Sig. genes		LIF interleukin 6 family cytokine [Source:HGNC Symbol;Acc:HGNC:6596]
ENSG00000128510	CPA4	68.2885	0.94661	0.275755	3.4328	0.000597387	0.0106672	Sig. genes		carboxypeptidase A4 [Source:HGNC Symbol;Acc:HGNC:15740]
ENSG00000128591	FLNC	44.918	1.32634	0.300907	4.40782	1.04415e-05	0.000403035	Sig. genes		filamin C [Source:HGNC Symbol;Acc:HGNC:3756]
ENSG00000128595	CALU	1222.85	0.575869	0.101634	5.66609	1.46093e-08	1.25795e-06	Sig. genes		calumenin [Source:HGNC Symbol;Acc:HGNC:1458]
ENSG00000128655	PDE11A	124.394	1.07742	0.208603	5.16494	2.4051e-07	1.49567e-05	Sig. genes
ENSG00000128694	OSGEPL1	66.9977	-0.68762	0.21066	-3.26412	0.00109804	0.0171008	Sig. genes		O-sialoglycoprotein endopeptidase like 1 [Source:HGNC Symbol;Acc:HGNC:23075]
ENSG00000128739	SNRPN	1232.23	-0.173929	0.0592901	-2.93352	0.0033514	0.0396718	Sig. genes		small nuclear ribonucleoprotein polypeptide N [Source:HGNC Symbol;Acc:HGNC:11164]
ENSG00000128965	CHAC1	183.514	1.03115	0.250272	4.12013	3.78654e-05	0.00121754	Sig. genes		ChaC glutathione specific gamma-glutamylcyclotransferase 1 [Source:HGNC Symbol;Acc:HGNC:28680]
ENSG00000129003	VPS13C	564.417	-0.413821	0.129964	-3.18411	0.00145201	0.021364	Sig. genes		vacuolar protein sorting 13 homolog C [Source:HGNC Symbol;Acc:HGNC:23594]
ENSG00000129038	LOXL1	885.506	0.85173	0.123322	6.90655	4.96598e-12	9.26465e-10	Sig. genes		lysyl oxidase like 1 [Source:HGNC Symbol;Acc:HGNC:6665]
ENSG00000129071	MBD4	493.606	0.204554	0.0665717	3.07269	0.00212137	0.0284811	Sig. genes		methyl-CpG binding domain 4, DNA glycosylase [Source:HGNC Symbol;Acc:HGNC:6919]
ENSG00000129116	PALLD	891.411	0.452728	0.145707	3.1071	0.0018893	0.0261754	Sig. genes		palladin, cytoskeletal associated protein [Source:HGNC Symbol;Acc:HGNC:17068]
ENSG00000129159	KCNC1	9.64774	-1.89617	0.517693	-3.66273	0.000249538	0.00549044	Sig. genes		potassium voltage-gated channel subfamily C member 1 [Source:HGNC Symbol;Acc:HGNC:6233]
ENSG00000129235	TXNDC17	414.783	-0.300442	0.0977445	-3.07375	0.00211387	0.0284017	Sig. genes		thioredoxin domain containing 17 [Source:HGNC Symbol;Acc:HGNC:28218]
ENSG00000129244	ATP1B2	216.967	-1.17683	0.177645	-6.62463	3.48122e-11	5.46918e-09	Sig. genes		ATPase Na+/K+ transporting subunit beta 2 [Source:HGNC Symbol;Acc:HGNC:805]
ENSG00000129250	KIF1C	1290.6	-0.309818	0.105179	-2.94563	0.00322296	0.0384905	Sig. genes		kinesin family member 1C [Source:HGNC Symbol;Acc:HGNC:6317]
ENSG00000129467	ADCY4	49.0195	0.982309	0.231799	4.23776	2.25762e-05	0.000765795	Sig. genes		adenylate cyclase 4 [Source:HGNC Symbol;Acc:HGNC:235]
ENSG00000129595	EPB41L4A	35.0572	1.03639	0.359423	2.88347	0.00393323	0.0445438	Sig. genes		erythrocyte membrane protein band 4.1 like 4A [Source:HGNC Symbol;Acc:HGNC:13278]
ENSG00000129757	CDKN1C	892.084	-0.68884	0.139957	-4.92179	8.5755e-07	4.55749e-05	Sig. genes		cyclin dependent kinase inhibitor 1C [Source:HGNC Symbol;Acc:HGNC:1786]
ENSG00000129925	PGAP6	138.433	0.420529	0.122032	3.44607	0.000568812	0.0102489	Sig. genes		post-glycosylphosphatidylinositol attachment to proteins 6 [Source:HGNC Symbol;Acc:HGNC:17205]
ENSG00000130158	DOCK6	120.534	0.652567	0.202657	3.22006	0.00128163	0.0193542	Sig. genes		dedicator of cytokinesis 6 [Source:HGNC Symbol;Acc:HGNC:19189]
ENSG00000130402	ACTN4	2665.08	0.379805	0.091603	4.14621	3.38025e-05	0.00110475	Sig. genes		actinin alpha 4 [Source:HGNC Symbol;Acc:HGNC:166]
ENSG00000130449	ZSWIM6	267.512	0.488761	0.0977815	4.9985	5.77776e-07	3.22366e-05	Sig. genes		zinc finger SWIM-type containing 6 [Source:HGNC Symbol;Acc:HGNC:29316]
ENSG00000130508	PXDN	218.972	1.2634	0.239168	5.28246	1.27463e-07	8.68007e-06	Sig. genes		peroxidasin [Source:HGNC Symbol;Acc:HGNC:14966]
ENSG00000130513	GDF15	1592.98	0.542544	0.163789	3.31246	0.000924782	0.0149754	Sig. genes
ENSG00000130600	H19	7899.82	-0.75528	0.170526	-4.42913	9.46144e-06	0.000369182	Sig. genes
ENSG00000130635	COL5A1	218.567	1.24307	0.242396	5.12827	2.92419e-07	1.77533e-05	Sig. genes		collagen type V alpha 1 chain [Source:HGNC Symbol;Acc:HGNC:2209]
ENSG00000130762	ARHGEF16	32.084	-0.908571	0.231229	-3.92932	8.51878e-05	0.00232578	Sig. genes		Rho guanine nucleotide exchange factor 16 [Source:HGNC Symbol;Acc:HGNC:15515]
ENSG00000130766	SESN2	661.229	0.444833	0.123875	3.59097	0.00032945	0.00676658	Sig. genes		sestrin 2 [Source:HGNC Symbol;Acc:HGNC:20746]
ENSG00000130770	ATP5IF1	811.932	-0.312549	0.0784256	-3.98529	6.73978e-05	0.00194892	Sig. genes		ATP synthase inhibitory factor subunit 1 [Source:HGNC Symbol;Acc:HGNC:871]
ENSG00000130827	PLXNA3	103.923	0.571216	0.142851	3.99868	6.36967e-05	0.00187633	Sig. genes		plexin A3 [Source:HGNC Symbol;Acc:HGNC:9101]
ENSG00000130830	MPP1	132.715	-0.65548	0.165438	-3.96209	7.42961e-05	0.00211549	Sig. genes		membrane palmitoylated protein 1 [Source:HGNC Symbol;Acc:HGNC:7219]
ENSG00000130921	C12orf65	184.739	0.282	0.0949037	2.97143	0.00296417	0.0362625	Sig. genes		mitochondrial translation release factor in rescue [Source:HGNC Symbol;Acc:HGNC:26784]
ENSG00000131016	AKAP12	1351.23	1.03971	0.129086	8.05439	7.98771e-16	2.98042e-13	Sig. genes		A-kinase anchoring protein 12 [Source:HGNC Symbol;Acc:HGNC:370]
ENSG00000131094	C1QL1	21.8233	-1.43692	0.256648	-5.5988	2.15841e-08	1.78143e-06	Sig. genes		complement C1q like 1 [Source:HGNC Symbol;Acc:HGNC:24182]
ENSG00000131095	GFAP	24.891	-0.873747	0.301992	-2.89328	0.00381245	0.043658	Sig. genes		glial fibrillary acidic protein [Source:HGNC Symbol;Acc:HGNC:4235]
ENSG00000131143	COX4I1	3127.52	-0.304819	0.0527277	-5.781	7.42601e-09	6.85566e-07	Sig. genes		cytochrome c oxidase subunit 4I1 [Source:HGNC Symbol;Acc:HGNC:2265]
ENSG00000131196	NFATC1	137.179	0.325399	0.106284	3.0616	0.00220158	0.0292945	Sig. genes		nuclear factor of activated T cells 1 [Source:HGNC Symbol;Acc:HGNC:7775]
ENSG00000131236	CAP1	1507.45	0.42272	0.0818873	5.16222	2.44036e-07	1.51235e-05	Sig. genes		cyclase associated actin cytoskeleton regulatory protein 1 [Source:HGNC Symbol;Acc:HGNC:20040]
ENSG00000131242	RAB11FIP4	257.454	-0.956774	0.135799	-7.04551	1.84777e-12	3.81507e-10	Sig. genes		RAB11 family interacting protein 4 [Source:HGNC Symbol;Acc:HGNC:30267]
ENSG00000131378	RFTN1	99.5155	1.11976	0.183871	6.08993	1.12962e-09	1.31373e-07	Sig. genes		raftlin, lipid raft linker 1 [Source:HGNC Symbol;Acc:HGNC:30278]
ENSG00000131435	PDLIM4	785.789	0.5791	0.0774068	7.48126	7.36154e-14	1.8835e-11	Sig. genes		PDZ and LIM domain 4 [Source:HGNC Symbol;Acc:HGNC:16501]
ENSG00000131669	NINJ1	376.842	-0.306271	0.108019	-2.83535	0.00457756	0.0498686	Sig. genes		ninjurin 1 [Source:HGNC Symbol;Acc:HGNC:7824]
ENSG00000131711	MAP1B	2136.94	0.841914	0.11658	7.22176	5.13179e-13	1.10735e-10	Sig. genes		microtubule associated protein 1B [Source:HGNC Symbol;Acc:HGNC:6836]
ENSG00000131771	PPP1R1B	54.5486	-1.31827	0.250819	-5.25585	1.47343e-07	9.84669e-06	Sig. genes		protein phosphatase 1 regulatory inhibitor subunit 1B [Source:HGNC Symbol;Acc:HGNC:9287]
ENSG00000131848	ZSCAN5A	39.5666	-0.91189	0.274442	-3.32271	0.000891472	0.0145811	Sig. genes		zinc finger and SCAN domain containing 5A [Source:HGNC Symbol;Acc:HGNC:23710]
ENSG00000132002	DNAJB1	533.765	0.314214	0.107745	2.91627	0.00354249	0.0412791	Sig. genes		DnaJ heat shock protein family (Hsp40) member B1 [Source:HGNC Symbol;Acc:HGNC:5270]
ENSG00000132003	ZSWIM4	16.9396	1.02131	0.285257	3.58031	0.000343184	0.00699252	Sig. genes
ENSG00000132031	MATN3	10.5354	2.44451	0.553134	4.41938	9.89862e-06	0.000385401	Sig. genes		matrilin 3 [Source:HGNC Symbol;Acc:HGNC:6909]
ENSG00000132386	SERPINF1	1325.26	-0.99571	0.187622	-5.30701	1.11439e-07	7.67645e-06	Sig. genes		serpin family F member 1 [Source:HGNC Symbol;Acc:HGNC:8824]
ENSG00000132424	PNISR	2331.88	-0.211595	0.0717248	-2.9501	0.00317669	0.0380316	Sig. genes		PNN interacting serine and arginine rich protein [Source:HGNC Symbol;Acc:HGNC:21222]
ENSG00000132429	POPDC3	8.58852	1.69429	0.539463	3.14069	0.00168549	0.0240653	Sig. genes		popeye domain containing 3 [Source:HGNC Symbol;Acc:HGNC:17649]
ENSG00000132432	SEC61G	251.218	0.459201	0.150509	3.05098	0.00228096	0.0301937	Sig. genes		SEC61 translocon subunit gamma [Source:HGNC Symbol;Acc:HGNC:18277]
ENSG00000132434	LANCL2	60.8926	0.786936	0.164182	4.79307	1.64244e-06	7.90957e-05	Sig. genes		LanC like 2 [Source:HGNC Symbol;Acc:HGNC:6509]
ENSG00000132470	ITGB4	577.776	0.548838	0.185432	2.95977	0.00307865	0.0372307	Sig. genes		integrin subunit beta 4 [Source:HGNC Symbol;Acc:HGNC:6158]
ENSG00000132635	PCED1A	195.382	-0.42061	0.126939	-3.31349	0.000921387	0.014934	Sig. genes		PC-esterase domain containing 1A [Source:HGNC Symbol;Acc:HGNC:16212]
ENSG00000132716	DCAF8	523.742	-0.365468	0.0865996	-4.2202	2.44085e-05	0.000821723	Sig. genes		DDB1 and CUL4 associated factor 8 [Source:HGNC Symbol;Acc:HGNC:24891]
ENSG00000132879	FBXO44	165.277	-0.858235	0.143814	-5.96769	2.40633e-09	2.59623e-07	Sig. genes		F-box protein 44 [Source:HGNC Symbol;Acc:HGNC:24847]
ENSG00000132915	PDE6A	9.11994	1.98435	0.662478	2.99534	0.00274137	0.0344546	Sig. genes
ENSG00000133026	MYH10	1143.98	-0.590158	0.174356	-3.3848	0.000712311	0.0122905	Sig. genes
ENSG00000133083	DCLK1	27.9468	1.31612	0.427751	3.07683	0.00209216	0.0281523	Sig. genes		doublecortin like kinase 1 [Source:HGNC Symbol;Acc:HGNC:2700]
ENSG00000133110	POSTN	85.0295	2.13712	0.457434	4.67196	2.98338e-06	0.000130323	Sig. genes		periostin [Source:HGNC Symbol;Acc:HGNC:16953]
ENSG00000133112	TPT1	20551.1	0.248345	0.0574015	4.32645	1.51531e-05	0.000542784	Sig. genes		tumor protein, translationally-controlled 1 [Source:HGNC Symbol;Acc:HGNC:12022]
ENSG00000133216	EPHB2	71.2939	2.03094	0.35611	5.70312	1.17635e-08	1.03785e-06	Sig. genes		EPH receptor B2 [Source:HGNC Symbol;Acc:HGNC:3393]
ENSG00000133657	ATP13A3	316.872	0.314667	0.101848	3.08958	0.00200438	0.0272785	Sig. genes
ENSG00000133687	TMTC1	344.157	-0.621269	0.215103	-2.88824	0.00387405	0.0441419	Sig. genes		transmembrane O-mannosyltransferase targeting cadherins 1 [Source:HGNC Symbol;Acc:HGNC:24099]
ENSG00000133739	LRRCC1	244.127	-0.466233	0.127733	-3.65006	0.000262178	0.00568475	Sig. genes		leucine rich repeat and coiled-coil centrosomal protein 1 [Source:HGNC Symbol;Acc:HGNC:29373]
ENSG00000133816	MICAL2	549.145	0.425936	0.106653	3.99367	6.50589e-05	0.00189662	Sig. genes		microtubule associated monooxygenase, calponin and LIM domain containing 2 [Source:HGNC Symbol;Acc:HGNC:24693]
ENSG00000133985	TTC9	49.5068	0.987175	0.210759	4.68391	2.8146e-06	0.000123856	Sig. genes		tetratricopeptide repeat domain 9 [Source:HGNC Symbol;Acc:HGNC:20267]
ENSG00000134013	LOXL2	125.888	0.990358	0.182083	5.43903	5.35706e-08	4.04831e-06	Sig. genes		lysyl oxidase like 2 [Source:HGNC Symbol;Acc:HGNC:6666]
ENSG00000134030	CTIF	110.431	1.20465	0.12748	9.44972	3.39731e-21	2.25355e-18	Sig. genes		cap binding complex dependent translation initiation factor [Source:HGNC Symbol;Acc:HGNC:23925]
ENSG00000134108	ARL8B	335.65	0.284596	0.0966184	2.94556	0.00322366	0.0384905	Sig. genes		ADP ribosylation factor like GTPase 8B [Source:HGNC Symbol;Acc:HGNC:25564]
ENSG00000134198	TSPAN2	39.2229	1.3067	0.249565	5.23593	1.64156e-07	1.0691e-05	Sig. genes		tetraspanin 2 [Source:HGNC Symbol;Acc:HGNC:20659]
ENSG00000134215	VAV3	65.4433	-1.05055	0.352843	-2.9774	0.00290708	0.0357247	Sig. genes		vav guanine nucleotide exchange factor 3 [Source:HGNC Symbol;Acc:HGNC:12659]
ENSG00000134243	SORT1	285.127	0.380985	0.118631	3.21151	0.00132042	0.0198062	Sig. genes		sortilin 1 [Source:HGNC Symbol;Acc:HGNC:11186]
ENSG00000134278	SPIRE1	153.668	0.618177	0.131297	4.70823	2.49876e-06	0.000112444	Sig. genes
ENSG00000134291	TMEM106C	161.157	-0.317979	0.107381	-2.96121	0.00306431	0.0371325	Sig. genes		transmembrane protein 106C [Source:HGNC Symbol;Acc:HGNC:28775]
ENSG00000134352	IL6ST	1366.54	0.327628	0.109465	2.99299	0.00276259	0.0346485	Sig. genes		interleukin 6 cytokine family signal transducer [Source:HGNC Symbol;Acc:HGNC:6021]
ENSG00000134419	RPS15A	2813.48	0.307355	0.075423	4.07508	4.59981e-05	0.00144026	Sig. genes		ribosomal protein S15a [Source:HGNC Symbol;Acc:HGNC:10389]
ENSG00000134453	RBM17	791.883	-0.410497	0.135174	-3.0368	0.00239101	0.0312577	Sig. genes		RNA binding motif protein 17 [Source:HGNC Symbol;Acc:HGNC:16944]
ENSG00000134533	RERG	363.92	-0.913668	0.174862	-5.2251	1.74065e-07	1.12545e-05	Sig. genes		RAS like estrogen regulated growth inhibitor [Source:HGNC Symbol;Acc:HGNC:15980]
ENSG00000134684	YARS1	495.098	0.357856	0.118449	3.02119	0.00251786	0.0323725	Sig. genes
ENSG00000134709	HOOK1	167.432	-0.957234	0.322886	-2.96462	0.00303057	0.0369738	Sig. genes
ENSG00000134871	COL4A2	253.073	1.59734	0.24189	6.60357	4.01365e-11	6.19694e-09	Sig. genes		collagen type IV alpha 2 chain [Source:HGNC Symbol;Acc:HGNC:2203]
ENSG00000134873	CLDN10	21.5733	-1.49721	0.353278	-4.23805	2.25466e-05	0.000765795	Sig. genes		claudin 10 [Source:HGNC Symbol;Acc:HGNC:2033]
ENSG00000134910	STT3A	333.602	0.333449	0.10237	3.25729	0.0011248	0.0174568	Sig. genes		STT3 oligosaccharyltransferase complex catalytic subunit A [Source:HGNC Symbol;Acc:HGNC:6172]
ENSG00000134954	ETS1	134.189	0.634716	0.15211	4.17274	3.0096e-05	0.000992669	Sig. genes		ETS proto-oncogene 1, transcription factor [Source:HGNC Symbol;Acc:HGNC:3488]
ENSG00000134986	NREP	86.3679	0.689759	0.148142	4.65607	3.22308e-06	0.000139771	Sig. genes		neuronal regeneration related protein [Source:HGNC Symbol;Acc:HGNC:16834]
ENSG00000135052	GOLM1	94.8306	0.40073	0.133651	2.99833	0.00271467	0.0341911	Sig. genes		golgi membrane protein 1 [Source:HGNC Symbol;Acc:HGNC:15451]
ENSG00000135069	PSAT1	457.699	0.541236	0.142296	3.80359	0.000142612	0.00355597	Sig. genes		phosphoserine aminotransferase 1 [Source:HGNC Symbol;Acc:HGNC:19129]
ENSG00000135074	ADAM19	21.8738	1.3086	0.393175	3.32829	0.000873801	0.0143708	Sig. genes		ADAM metallopeptidase domain 19 [Source:HGNC Symbol;Acc:HGNC:197]
ENSG00000135111	TBX3	54.0994	0.797886	0.267073	2.98752	0.00281253	0.0350295	Sig. genes		T-box transcription factor 3 [Source:HGNC Symbol;Acc:HGNC:11602]
ENSG00000135318	NT5E	469.626	0.466139	0.0988299	4.71658	2.39848e-06	0.000108477	Sig. genes		5'-nucleotidase ecto [Source:HGNC Symbol;Acc:HGNC:8021]
ENSG00000135324	MRAP2	38.3841	-1.10249	0.230354	-4.78607	1.70075e-06	8.0159e-05	Sig. genes		melanocortin 2 receptor accessory protein 2 [Source:HGNC Symbol;Acc:HGNC:21232]
ENSG00000135404	CD63	6288.1	0.311574	0.0708857	4.39545	1.10545e-05	0.000419252	Sig. genes		CD63 molecule [Source:HGNC Symbol;Acc:HGNC:1692]
ENSG00000135423	GLS2	53.0619	-0.774192	0.16955	-4.56614	4.96781e-06	0.000205008	Sig. genes		glutaminase 2 [Source:HGNC Symbol;Acc:HGNC:29570]
ENSG00000135441	BLOC1S1	120.827	0.401114	0.122268	3.28061	0.00103584	0.0163453	Sig. genes
ENSG00000135469	COQ10A	102.668	-0.699643	0.146829	-4.76502	1.88831e-06	8.78431e-05	Sig. genes		coenzyme Q10A [Source:HGNC Symbol;Acc:HGNC:26515]
ENSG00000135480	KRT7	82.81	1.09196	0.208357	5.24081	1.59875e-07	1.05271e-05	Sig. genes
ENSG00000135486	HNRNPA1	1379.11	0.242353	0.0854423	2.83645	0.00456174	0.0497569	Sig. genes		heterogeneous nuclear ribonucleoprotein A1 [Source:HGNC Symbol;Acc:HGNC:5031]
ENSG00000135677	GNS	980.929	0.30825	0.0661522	4.65971	3.16652e-06	0.000137986	Sig. genes		glucosamine (N-acetyl)-6-sulfatase [Source:HGNC Symbol;Acc:HGNC:4422]
ENSG00000135821	GLUL	1184.28	-0.418158	0.0891711	-4.68939	2.7402e-06	0.000121779	Sig. genes		glutamate-ammonia ligase [Source:HGNC Symbol;Acc:HGNC:4341]
ENSG00000135842	NIBAN1	601.639	0.851034	0.193287	4.40295	1.06788e-05	0.000409545	Sig. genes		niban apoptosis regulator 1 [Source:HGNC Symbol;Acc:HGNC:16784]
ENSG00000135899	SP110	326.423	-0.339118	0.0953441	-3.55678	0.000375427	0.00750434	Sig. genes		SP110 nuclear body protein [Source:HGNC Symbol;Acc:HGNC:5401]
ENSG00000135919	SERPINE2	4384.74	1.2596	0.1362	9.24818	2.2835e-20	1.31928e-17	Sig. genes		serpin family E member 2 [Source:HGNC Symbol;Acc:HGNC:8951]
ENSG00000135940	COX5B	1440.4	-0.348864	0.0541247	-6.44556	1.15174e-10	1.66352e-08	Sig. genes		cytochrome c oxidase subunit 5B [Source:HGNC Symbol;Acc:HGNC:2269]
ENSG00000135951	TSGA10	155.394	0.790531	0.249932	3.16298	0.00156163	0.0226834	Sig. genes		testis specific 10 [Source:HGNC Symbol;Acc:HGNC:14927]
ENSG00000136010	ALDH1L2	47.7256	0.921765	0.295182	3.1227	0.00179198	0.0251918	Sig. genes		aldehyde dehydrogenase 1 family member L2 [Source:HGNC Symbol;Acc:HGNC:26777]
ENSG00000136111	TBC1D4	404.412	-0.734492	0.175048	-4.19594	2.71744e-05	0.000899618	Sig. genes		TBC1 domain family member 4 [Source:HGNC Symbol;Acc:HGNC:19165]
ENSG00000136205	TNS3	136.34	0.893087	0.2575	3.4683	0.000523763	0.00962351	Sig. genes		tensin 3 [Source:HGNC Symbol;Acc:HGNC:21616]
ENSG00000136231	IGF2BP3	7.77824	1.89826	0.613759	3.09284	0.00198248	0.027042	Sig. genes		insulin like growth factor 2 mRNA binding protein 3 [Source:HGNC Symbol;Acc:HGNC:28868]
ENSG00000136240	KDELR2	580.38	0.328013	0.0916353	3.57955	0.000344188	0.00700501	Sig. genes		KDEL endoplasmic reticulum protein retention receptor 2 [Source:HGNC Symbol;Acc:HGNC:6305]
ENSG00000136279	DBNL	262.442	0.332554	0.113091	2.94058	0.00327596	0.038952	Sig. genes		drebrin like [Source:HGNC Symbol;Acc:HGNC:2696]
ENSG00000136305	CIDEB	13.3275	-0.912058	0.296403	-3.07708	0.00209037	0.0281493	Sig. genes
ENSG00000136379	ABHD17C	199.935	-0.475736	0.0977863	-4.86506	1.14424e-06	5.78907e-05	Sig. genes		abhydrolase domain containing 17C, depalmitoylase [Source:HGNC Symbol;Acc:HGNC:26925]
ENSG00000136521	NDUFB5	187.198	-0.518314	0.149473	-3.4676	0.000525129	0.00963633	Sig. genes		NADH:ubiquinone oxidoreductase subunit B5 [Source:HGNC Symbol;Acc:HGNC:7700]
ENSG00000136603	SKIL	343.039	0.592105	0.176565	3.35346	0.000798067	0.013421	Sig. genes		SKI like proto-oncogene [Source:HGNC Symbol;Acc:HGNC:10897]
ENSG00000136720	HS6ST1	70.8944	0.972596	0.18793	5.17532	2.27517e-07	1.43987e-05	Sig. genes		heparan sulfate 6-O-sulfotransferase 1 [Source:HGNC Symbol;Acc:HGNC:5201]
ENSG00000136869	TLR4	98.4178	0.99403	0.207588	4.78847	1.68058e-06	7.96277e-05	Sig. genes		toll like receptor 4 [Source:HGNC Symbol;Acc:HGNC:11850]
ENSG00000136944	LMX1B	278.7	-0.587652	0.15893	-3.69756	0.000217684	0.00494135	Sig. genes		LIM homeobox transcription factor 1 beta [Source:HGNC Symbol;Acc:HGNC:6654]
ENSG00000136997	MYC	28.1443	1.11059	0.280477	3.95965	7.50593e-05	0.00213045	Sig. genes		MYC proto-oncogene, bHLH transcription factor [Source:HGNC Symbol;Acc:HGNC:7553]
ENSG00000137070	IL11RA	229.126	-0.361372	0.104386	-3.46188	0.000536424	0.00980343	Sig. genes
ENSG00000137106	GRHPR	387.595	-0.469884	0.128731	-3.65012	0.000262121	0.00568475	Sig. genes		glyoxylate and hydroxypyruvate reductase [Source:HGNC Symbol;Acc:HGNC:4570]
ENSG00000137124	ALDH1B1	41.5094	0.548724	0.180885	3.03355	0.00241693	0.0314587	Sig. genes		aldehyde dehydrogenase 1 family member B1 [Source:HGNC Symbol;Acc:HGNC:407]
ENSG00000137193	PIM1	110.188	0.493273	0.13467	3.66282	0.000249458	0.00549044	Sig. genes		Pim-1 proto-oncogene, serine/threonine kinase [Source:HGNC Symbol;Acc:HGNC:8986]
ENSG00000137309	HMGA1	934.735	0.609683	0.113976	5.3492	8.8342e-08	6.25378e-06	Sig. genes		high mobility group AT-hook 1 [Source:HGNC Symbol;Acc:HGNC:5010]
ENSG00000137463	MGARP	1682.41	-0.914395	0.135123	-6.76716	1.31337e-11	2.35225e-09	Sig. genes		mitochondria localized glutamic acid rich protein [Source:HGNC Symbol;Acc:HGNC:29969]
ENSG00000137474	MYO7A	96.5151	-1.21499	0.229633	-5.29101	1.2164e-07	8.31515e-06	Sig. genes
ENSG00000137491	SLCO2B1	15.904	1.82622	0.429775	4.24924	2.14492e-05	0.000737343	Sig. genes		solute carrier organic anion transporter family member 2B1 [Source:HGNC Symbol;Acc:HGNC:10962]
ENSG00000137496	IL18BP	31.1749	-1.25833	0.348444	-3.61129	0.000304674	0.00636772	Sig. genes		interleukin 18 binding protein [Source:HGNC Symbol;Acc:HGNC:5987]
ENSG00000137507	LRRC32	57.9381	0.607871	0.184193	3.30018	0.000966229	0.0154098	Sig. genes		leucine rich repeat containing 32 [Source:HGNC Symbol;Acc:HGNC:4161]
ENSG00000137509	PRCP	938.275	-0.247504	0.0707471	-3.49844	0.000467991	0.00889778	Sig. genes		prolylcarboxypeptidase [Source:HGNC Symbol;Acc:HGNC:9344]
ENSG00000137563	GGH	89.1398	0.468196	0.150877	3.10315	0.0019147	0.0264396	Sig. genes		gamma-glutamyl hydrolase [Source:HGNC Symbol;Acc:HGNC:4248]
ENSG00000137573	SULF1	1299.79	-0.580927	0.186129	-3.12111	0.00180173	0.0252671	Sig. genes		sulfatase 1 [Source:HGNC Symbol;Acc:HGNC:20391]
ENSG00000137642	SORL1	528.701	-0.900299	0.182626	-4.92975	8.23364e-07	4.38883e-05	Sig. genes		sortilin related receptor 1 [Source:HGNC Symbol;Acc:HGNC:11185]
ENSG00000137767	SQOR	411.771	0.398547	0.12256	3.25184	0.00114661	0.0177491	Sig. genes		sulfide quinone oxidoreductase [Source:HGNC Symbol;Acc:HGNC:20390]
ENSG00000137776	SLTM	1042.08	-0.266655	0.0861957	-3.0936	0.00197743	0.0269937	Sig. genes		SAFB like transcription modulator [Source:HGNC Symbol;Acc:HGNC:20709]
ENSG00000137801	THBS1	3524.01	0.965449	0.125046	7.72072	1.15671e-14	3.51131e-12	Sig. genes		thrombospondin 1 [Source:HGNC Symbol;Acc:HGNC:11785]
ENSG00000137809	ITGA11	216.368	2.53466	0.327826	7.73172	1.06101e-14	3.27633e-12	Sig. genes		integrin subunit alpha 11 [Source:HGNC Symbol;Acc:HGNC:6136]
ENSG00000137872	SEMA6D	185.338	-0.7933	0.166779	-4.75661	1.96875e-06	9.08771e-05	Sig. genes		semaphorin 6D [Source:HGNC Symbol;Acc:HGNC:16770]
ENSG00000137876	RSL24D1	302.403	0.330338	0.0961256	3.43653	0.000589224	0.0105636	Sig. genes		ribosomal L24 domain containing 1 [Source:HGNC Symbol;Acc:HGNC:18479]
ENSG00000137878	GCOM1	52.1742	-1.36828	0.170517	-8.02432	1.02093e-15	3.7316e-13	Sig. genes		GCOM1, MYZAP-POLR2M combined locus [Source:HGNC Symbol;Acc:HGNC:26424]
ENSG00000137880	GCHFR	83.9256	-0.67395	0.158533	-4.25118	2.12651e-05	0.000733831	Sig. genes		GTP cyclohydrolase I feedback regulator [Source:HGNC Symbol;Acc:HGNC:4194]
ENSG00000137941	TTLL7	149.283	1.02464	0.352221	2.90909	0.00362481	0.0420196	Sig. genes		tubulin tyrosine ligase like 7 [Source:HGNC Symbol;Acc:HGNC:26242]
ENSG00000138031	ADCY3	87.7307	0.410176	0.135003	3.03827	0.00237941	0.0311287	Sig. genes		adenylate cyclase 3 [Source:HGNC Symbol;Acc:HGNC:234]
ENSG00000138069	RAB1A	407.442	0.3395	0.0714388	4.75232	2.01095e-06	9.25863e-05	Sig. genes		RAB1A, member RAS oncogene family [Source:HGNC Symbol;Acc:HGNC:9758]
ENSG00000138119	MYOF	448.179	0.537304	0.123951	4.33482	1.45878e-05	0.000525689	Sig. genes		myoferlin [Source:HGNC Symbol;Acc:HGNC:3656]
ENSG00000138131	LOXL4	102.088	1.84275	0.290246	6.34894	2.16801e-10	3.01001e-08	Sig. genes		lysyl oxidase like 4 [Source:HGNC Symbol;Acc:HGNC:17171]
ENSG00000138193	PLCE1	458.546	-0.898012	0.194388	-4.6197	3.84302e-06	0.000162331	Sig. genes
ENSG00000138448	ITGAV	278.485	0.473595	0.133788	3.5399	0.00040028	0.00786939	Sig. genes		integrin subunit alpha V [Source:HGNC Symbol;Acc:HGNC:6150]
ENSG00000138623	SEMA7A	47.4662	1.30466	0.393215	3.31792	0.000906895	0.0147448	Sig. genes		semaphorin 7A (John Milton Hagen blood group) [Source:HGNC Symbol;Acc:HGNC:10741]
ENSG00000138650	PCDH10	105.642	0.88168	0.224992	3.91873	8.90186e-05	0.00240834	Sig. genes		protocadherin 10 [Source:HGNC Symbol;Acc:HGNC:13404]
ENSG00000138760	SCARB2	658.265	0.212412	0.0701534	3.02782	0.00246326	0.0318764	Sig. genes		scavenger receptor class B member 2 [Source:HGNC Symbol;Acc:HGNC:1665]
ENSG00000138772	ANXA3	35.1808	1.40039	0.38841	3.60544	0.000311626	0.00647473	Sig. genes		annexin A3 [Source:HGNC Symbol;Acc:HGNC:541]
ENSG00000138867	GUCD1	235.724	0.318445	0.100256	3.17633	0.00149152	0.0218066	Sig. genes		guanylyl cyclase domain containing 1 [Source:HGNC Symbol;Acc:HGNC:14237]
ENSG00000139112	GABARAPL1	1166.14	0.578871	0.0856277	6.76033	1.37678e-11	2.4414e-09	Sig. genes		GABA type A receptor associated protein like 1 [Source:HGNC Symbol;Acc:HGNC:4068]
ENSG00000139174	PRICKLE1	172.667	-0.640509	0.178123	-3.59588	0.000323297	0.00665546	Sig. genes		prickle planar cell polarity protein 1 [Source:HGNC Symbol;Acc:HGNC:17019]
ENSG00000139190	VAMP1	58.3914	-0.825472	0.207807	-3.97231	7.11804e-05	0.00203649	Sig. genes		vesicle associated membrane protein 1 [Source:HGNC Symbol;Acc:HGNC:12642]
ENSG00000139278	GLIPR1	298.597	0.648438	0.215301	3.01178	0.00259725	0.0330609	Sig. genes		GLI pathogenesis related 1 [Source:HGNC Symbol;Acc:HGNC:17001]
ENSG00000139370	SLC15A4	370.631	0.476582	0.0905936	5.26066	1.43542e-07	9.66477e-06	Sig. genes		solute carrier family 15 member 4 [Source:HGNC Symbol;Acc:HGNC:23090]
ENSG00000139508	SLC46A3	383.499	0.8702	0.103429	8.41351	3.97906e-17	1.82731e-14	Sig. genes		solute carrier family 46 member 3 [Source:HGNC Symbol;Acc:HGNC:27501]
ENSG00000139514	SLC7A1	423.123	0.782038	0.131772	5.93479	2.94222e-09	3.09971e-07	Sig. genes		solute carrier family 7 member 1 [Source:HGNC Symbol;Acc:HGNC:11057]
ENSG00000139547	RDH16	13.808	3.3319	0.621701	5.35933	8.35318e-08	5.93672e-06	Sig. genes		retinol dehydrogenase 16 [Source:HGNC Symbol;Acc:HGNC:29674]
ENSG00000139644	TMBIM6	2652.52	0.225885	0.0749033	3.01569	0.00256399	0.0327759	Sig. genes		transmembrane BAX inhibitor motif containing 6 [Source:HGNC Symbol;Acc:HGNC:11723]
ENSG00000139826	ABHD13	58.1708	0.586167	0.14842	3.94938	7.83549e-05	0.00218929	Sig. genes		abhydrolase domain containing 13 [Source:HGNC Symbol;Acc:HGNC:20293]
ENSG00000139998	RAB15	19.4584	0.95662	0.320351	2.98616	0.00282507	0.0350414	Sig. genes		RAB15, member RAS oncogene family [Source:HGNC Symbol;Acc:HGNC:20150]
ENSG00000140092	FBLN5	411.059	1.19318	0.178235	6.69443	2.1652e-11	3.52535e-09	Sig. genes		fibulin 5 [Source:HGNC Symbol;Acc:HGNC:3602]
ENSG00000140105	WARS1	534.589	0.554365	0.111646	4.96539	6.85634e-07	3.70988e-05	Sig. genes		tryptophanyl-tRNA synthetase 1 [Source:HGNC Symbol;Acc:HGNC:12729]
ENSG00000140284	SLC27A2	58.5736	0.939094	0.289272	3.24641	0.00116871	0.0179978	Sig. genes		solute carrier family 27 member 2 [Source:HGNC Symbol;Acc:HGNC:10996]
ENSG00000140285	FGF7	1130.13	-0.566695	0.191334	-2.96181	0.0030584	0.0370859	Sig. genes		fibroblast growth factor 7 [Source:HGNC Symbol;Acc:HGNC:3685]
ENSG00000140307	GTF2A2	266.505	-0.199061	0.0638351	-3.11836	0.00181859	0.0254578	Sig. genes		general transcription factor IIA subunit 2 [Source:HGNC Symbol;Acc:HGNC:4647]
ENSG00000140350	ANP32A	230.693	-0.519187	0.108003	-4.80717	1.5308e-06	7.45015e-05	Sig. genes		acidic nuclear phosphoprotein 32 family member A [Source:HGNC Symbol;Acc:HGNC:13233]
ENSG00000140386	SCAPER	323.211	-0.562214	0.142766	-3.93802	8.21565e-05	0.00227422	Sig. genes		S-phase cyclin A associated protein in the ER [Source:HGNC Symbol;Acc:HGNC:13081]
ENSG00000140391	TSPAN3	1034.98	0.304722	0.056317	5.41084	6.27303e-08	4.54858e-06	Sig. genes		tetraspanin 3 [Source:HGNC Symbol;Acc:HGNC:17752]
ENSG00000140395	WDR61	345.968	-0.393752	0.0971719	-4.05212	5.07563e-05	0.00155393	Sig. genes		WD repeat domain 61 [Source:HGNC Symbol;Acc:HGNC:30300]
ENSG00000140398	NEIL1	134.934	-0.443327	0.129984	-3.41064	0.000648113	0.0113363	Sig. genes		nei like DNA glycosylase 1 [Source:HGNC Symbol;Acc:HGNC:18448]
ENSG00000140416	TPM1	2662.42	0.527297	0.130448	4.0422	5.2951e-05	0.00160738	Sig. genes		tropomyosin 1 [Source:HGNC Symbol;Acc:HGNC:12010]
ENSG00000140545	MFGE8	228.591	0.530631	0.160987	3.29611	0.000980326	0.015603	Sig. genes
ENSG00000140563	MCTP2	46.3656	0.70743	0.207793	3.40449	0.000662872	0.0115487	Sig. genes
ENSG00000140564	FURIN	269.293	0.392864	0.0984066	3.99225	6.54482e-05	0.0018998	Sig. genes		furin, paired basic amino acid cleaving enzyme [Source:HGNC Symbol;Acc:HGNC:8568]
ENSG00000140612	SEC11A	630.599	0.294373	0.0683072	4.30955	1.63584e-05	0.000582462	Sig. genes		SEC11 homolog A, signal peptidase complex subunit [Source:HGNC Symbol;Acc:HGNC:17718]
ENSG00000140807	NKD1	48.7804	0.765321	0.259246	2.9521	0.00315621	0.0378618	Sig. genes		NKD inhibitor of WNT signaling pathway 1 [Source:HGNC Symbol;Acc:HGNC:17045]
ENSG00000140859	KIFC3	575.104	0.310758	0.102714	3.02546	0.00248253	0.0320332	Sig. genes		kinesin family member C3 [Source:HGNC Symbol;Acc:HGNC:6326]
ENSG00000140931	CMTM3	132.222	0.527401	0.128944	4.09016	4.31076e-05	0.00136647	Sig. genes		CKLF like MARVEL transmembrane domain containing 3 [Source:HGNC Symbol;Acc:HGNC:19174]
ENSG00000140941	MAP1LC3B	747.155	0.504285	0.0880091	5.72991	1.00482e-08	8.95338e-07	Sig. genes		microtubule associated protein 1 light chain 3 beta [Source:HGNC Symbol;Acc:HGNC:13352]
ENSG00000140961	OSGIN1	92.4693	0.758066	0.243441	3.11396	0.00184595	0.0257484	Sig. genes		oxidative stress induced growth inhibitor 1 [Source:HGNC Symbol;Acc:HGNC:30093]
ENSG00000140988	RPS2	6616.72	0.29428	0.0669565	4.3951	1.10724e-05	0.000419252	Sig. genes		ribosomal protein S2 [Source:HGNC Symbol;Acc:HGNC:10404]
ENSG00000141052	MYOCD	42.2134	1.10675	0.319197	3.4673	0.000525719	0.00963729	Sig. genes		myocardin [Source:HGNC Symbol;Acc:HGNC:16067]
ENSG00000141068	KSR1	127.207	0.628642	0.217615	2.88878	0.00386734	0.0441172	Sig. genes
ENSG00000141469	SLC14A1	5.61783	2.80948	0.699808	4.01464	5.95354e-05	0.00176829	Sig. genes		solute carrier family 14 member 1 (Kidd blood group) [Source:HGNC Symbol;Acc:HGNC:10918]
ENSG00000141582	CBX4	335.539	-0.291176	0.0996128	-2.92308	0.00346591	0.0406512	Sig. genes		chromobox 4 [Source:HGNC Symbol;Acc:HGNC:1554]
ENSG00000141738	GRB7	97.8823	-0.537215	0.173018	-3.10498	0.00190294	0.0262976	Sig. genes		growth factor receptor bound protein 7 [Source:HGNC Symbol;Acc:HGNC:4567]
ENSG00000141750	STAC2	24.8799	-1.52997	0.371998	-4.11283	3.90837e-05	0.00125222	Sig. genes		SH3 and cysteine rich domain 2 [Source:HGNC Symbol;Acc:HGNC:23990]
ENSG00000141756	FKBP10	756.016	0.405693	0.117501	3.45268	0.000555052	0.0100414	Sig. genes		FKBP prolyl isomerase 10 [Source:HGNC Symbol;Acc:HGNC:18169]
ENSG00000141858	SAMD1	91.6642	0.392704	0.115863	3.38938	0.000700513	0.0121219	Sig. genes		sterile alpha motif domain containing 1 [Source:HGNC Symbol;Acc:HGNC:17958]
ENSG00000142089	IFITM3	8429.34	-0.549305	0.0929447	-5.91002	3.42064e-09	3.46122e-07	Sig. genes		interferon induced transmembrane protein 3 [Source:HGNC Symbol;Acc:HGNC:5414]
ENSG00000142192	APP	9107.33	-0.689137	0.0944062	-7.2997	2.8842e-13	6.70857e-11	Sig. genes		amyloid beta precursor protein [Source:HGNC Symbol;Acc:HGNC:620]
ENSG00000142208	AKT1	216.12	0.339946	0.10982	3.09548	0.00196497	0.0269056	Sig. genes		AKT serine/threonine kinase 1 [Source:HGNC Symbol;Acc:HGNC:391]
ENSG00000142279	WTIP	150.043	0.390615	0.128563	3.03832	0.00237898	0.0311287	Sig. genes		WT1 interacting protein [Source:HGNC Symbol;Acc:HGNC:20964]
ENSG00000142798	HSPG2	349.745	0.425098	0.115668	3.67516	0.000237704	0.00530172	Sig. genes		heparan sulfate proteoglycan 2 [Source:HGNC Symbol;Acc:HGNC:5273]
ENSG00000142871	CCN1	901.853	1.78902	0.173476	10.3128	6.1666e-25	8.49567e-22	Sig. genes		cellular communication network factor 1 [Source:HGNC Symbol;Acc:HGNC:2654]
ENSG00000142875	PRKACB	87.455	0.373442	0.130215	2.86788	0.00413226	0.0462844	Sig. genes
ENSG00000142949	PTPRF	694.142	0.558591	0.175375	3.18511	0.00144697	0.021364	Sig. genes		protein tyrosine phosphatase receptor type F [Source:HGNC Symbol;Acc:HGNC:9670]
ENSG00000143001	TMEM61	22.6309	-1.22066	0.352678	-3.46113	0.000537915	0.009815	Sig. genes		transmembrane protein 61 [Source:HGNC Symbol;Acc:HGNC:27296]
ENSG00000143013	LMO4	481.406	0.356796	0.116403	3.06518	0.00217536	0.0290534	Sig. genes		LIM domain only 4 [Source:HGNC Symbol;Acc:HGNC:6644]
ENSG00000143147	GPR161	105.759	0.547585	0.179849	3.0447	0.00232915	0.0305829	Sig. genes		G protein-coupled receptor 161 [Source:HGNC Symbol;Acc:HGNC:23694]
ENSG00000143195	ILDR2	14.2345	1.65809	0.546481	3.03411	0.00241245	0.0314233	Sig. genes		immunoglobulin like domain containing receptor 2 [Source:HGNC Symbol;Acc:HGNC:18131]
ENSG00000143248	RGS5	6632.16	-0.83993	0.167318	-5.01998	5.16779e-07	2.93826e-05	Sig. genes		regulator of G protein signaling 5 [Source:HGNC Symbol;Acc:HGNC:10001]
ENSG00000143322	ABL2	446.486	0.458976	0.11765	3.90119	9.57221e-05	0.00256261	Sig. genes		ABL proto-oncogene 2, non-receptor tyrosine kinase [Source:HGNC Symbol;Acc:HGNC:77]
ENSG00000143333	RGS16	195.43	-0.381814	0.133309	-2.86413	0.00418155	0.0467197	Sig. genes		regulator of G protein signaling 16 [Source:HGNC Symbol;Acc:HGNC:9997]
ENSG00000143365	RORC	16.3211	-0.926488	0.304553	-3.04212	0.00234918	0.0308233	Sig. genes		RAR related orphan receptor C [Source:HGNC Symbol;Acc:HGNC:10260]
ENSG00000143376	SNX27	552.528	-0.334224	0.0767667	-4.35376	1.33824e-05	0.000488146	Sig. genes		sorting nexin 27 [Source:HGNC Symbol;Acc:HGNC:20073]
ENSG00000143401	ANP32E	221.464	-0.498117	0.168413	-2.95771	0.00309938	0.0374056	Sig. genes		acidic nuclear phosphoprotein 32 family member E [Source:HGNC Symbol;Acc:HGNC:16673]
ENSG00000143409	MINDY1	39.0693	-0.606283	0.184898	-3.27901	0.00104171	0.0164089	Sig. genes
ENSG00000143416	SELENBP1	41.7845	-0.754176	0.223599	-3.37289	0.00074383	0.0127361	Sig. genes		selenium binding protein 1 [Source:HGNC Symbol;Acc:HGNC:10719]
ENSG00000143457	GOLPH3L	321.26	-0.430027	0.105491	-4.07642	4.57346e-05	0.00143451	Sig. genes		golgi phosphoprotein 3 like [Source:HGNC Symbol;Acc:HGNC:24882]
ENSG00000143479	DYRK3	72.2593	0.584935	0.155043	3.77272	0.000161475	0.00390812	Sig. genes		dual specificity tyrosine phosphorylation regulated kinase 3 [Source:HGNC Symbol;Acc:HGNC:3094]
ENSG00000143545	RAB13	715.806	-0.195788	0.0680293	-2.878	0.00400206	0.0450798	Sig. genes		RAB13, member RAS oncogene family [Source:HGNC Symbol;Acc:HGNC:9762]
ENSG00000143556	S100A7	3.92751	2.97792	1.01934	2.92141	0.00348449	0.0408425	Sig. genes		S100 calcium binding protein A7 [Source:HGNC Symbol;Acc:HGNC:10497]
ENSG00000143641	GALNT2	219.827	0.503246	0.154302	3.26143	0.00110852	0.0172191	Sig. genes		polypeptide N-acetylgalactosaminyltransferase 2 [Source:HGNC Symbol;Acc:HGNC:4124]
ENSG00000143653	SCCPDH	66.8999	0.417304	0.134388	3.10521	0.00190145	0.0262972	Sig. genes		saccharopine dehydrogenase (putative) [Source:HGNC Symbol;Acc:HGNC:24275]
ENSG00000143768	LEFTY2	50.7581	3.73876	0.590843	6.32785	2.48608e-10	3.42505e-08	Sig. genes		left-right determination factor 2 [Source:HGNC Symbol;Acc:HGNC:3122]
ENSG00000143772	ITPKB	130.619	-0.444157	0.150864	-2.94409	0.0032391	0.0385976	Sig. genes
ENSG00000143811	PYCR2	205.473	0.345291	0.0955747	3.61279	0.00030292	0.00636772	Sig. genes
ENSG00000143845	ETNK2	181.09	-0.333583	0.110282	-3.02481	0.00248793	0.0320798	Sig. genes		ethanolamine kinase 2 [Source:HGNC Symbol;Acc:HGNC:25575]
ENSG00000143862	ARL8A	336.639	0.274611	0.0909425	3.01961	0.00253098	0.0324984	Sig. genes		ADP ribosylation factor like GTPase 8A [Source:HGNC Symbol;Acc:HGNC:25192]
ENSG00000143869	GDF7	18.9674	1.241	0.354485	3.50085	0.000463774	0.00884579	Sig. genes		growth differentiation factor 7 [Source:HGNC Symbol;Acc:HGNC:4222]
ENSG00000143878	RHOB	67.662	0.689797	0.173748	3.97011	7.18391e-05	0.00205205	Sig. genes		ras homolog family member B [Source:HGNC Symbol;Acc:HGNC:668]
ENSG00000143933	CALM2	1436.72	0.230079	0.0801226	2.87159	0.00408408	0.0457734	Sig. genes
ENSG00000144136	SLC20A1	1433.85	-0.547377	0.14518	-3.77034	0.000163027	0.00392976	Sig. genes		solute carrier family 20 member 1 [Source:HGNC Symbol;Acc:HGNC:10946]
ENSG00000144199	FAHD2B	48.2482	-0.586803	0.206453	-2.84231	0.00447881	0.0490895	Sig. genes		fumarylacetoacetate hydrolase domain containing 2B [Source:HGNC Symbol;Acc:HGNC:25318]
ENSG00000144224	UBXN4	1171.12	0.15059	0.0490399	3.07077	0.00213508	0.0286437	Sig. genes		UBX domain protein 4 [Source:HGNC Symbol;Acc:HGNC:14860]
ENSG00000144366	GULP1	388.592	-0.440538	0.137218	-3.21049	0.00132508	0.0198503	Sig. genes		GULP PTB domain containing engulfment adaptor 1 [Source:HGNC Symbol;Acc:HGNC:18649]
ENSG00000144583	MARCHF4	67.2851	1.56097	0.305061	5.11691	3.10587e-07	1.8604e-05	Sig. genes		membrane associated ring-CH-type finger 4 [Source:HGNC Symbol;Acc:HGNC:29269]
ENSG00000144645	OSBPL10	244.145	0.41784	0.120777	3.45959	0.000540996	0.0098468	Sig. genes		oxysterol binding protein like 10 [Source:HGNC Symbol;Acc:HGNC:16395]
ENSG00000144648	ACKR2	18.736	1.20017	0.316662	3.79006	0.000150609	0.00370014	Sig. genes		atypical chemokine receptor 2 [Source:HGNC Symbol;Acc:HGNC:1565]
ENSG00000144744	UBA3	94.9545	-0.413754	0.137305	-3.01341	0.00258332	0.0329774	Sig. genes		ubiquitin like modifier activating enzyme 3 [Source:HGNC Symbol;Acc:HGNC:12470]
ENSG00000144893	MED12L	168.84	-1.08461	0.278612	-3.89292	9.9046e-05	0.00264369	Sig. genes
ENSG00000145020	AMT	92.9589	-0.758805	0.173818	-4.36551	1.26826e-05	0.000467378	Sig. genes		aminomethyltransferase [Source:HGNC Symbol;Acc:HGNC:473]
ENSG00000145147	SLIT2	132.029	2.70844	0.326807	8.28759	1.15568e-16	4.5996e-14	Sig. genes		slit guidance ligand 2 [Source:HGNC Symbol;Acc:HGNC:11086]
ENSG00000145247	OCIAD2	215.713	0.559456	0.113719	4.91964	8.67024e-07	4.5942e-05	Sig. genes		OCIA domain containing 2 [Source:HGNC Symbol;Acc:HGNC:28685]
ENSG00000145358	DDIT4L	53.7898	0.760851	0.245484	3.09938	0.00193924	0.0266552	Sig. genes		DNA damage inducible transcript 4 like [Source:HGNC Symbol;Acc:HGNC:30555]
ENSG00000145362	ANK2	418.016	-0.826479	0.196311	-4.21004	2.55322e-05	0.00085155	Sig. genes		ankyrin 2 [Source:HGNC Symbol;Acc:HGNC:493]
ENSG00000145592	RPL37	8914.99	0.227088	0.0751413	3.02214	0.00250992	0.0323333	Sig. genes		ribosomal protein L37 [Source:HGNC Symbol;Acc:HGNC:10347]
ENSG00000145632	PLK2	104.303	0.7671	0.246569	3.1111	0.00186393	0.0259184	Sig. genes		polo like kinase 2 [Source:HGNC Symbol;Acc:HGNC:19699]
ENSG00000145685	LHFPL2	344.252	0.460533	0.12601	3.65473	0.000257448	0.00562304	Sig. genes		LHFPL tetraspan subfamily member 2 [Source:HGNC Symbol;Acc:HGNC:6588]
ENSG00000145721	LIX1	56.2844	-1.70792	0.33429	-5.10909	3.23719e-07	1.92618e-05	Sig. genes		limb and CNS expressed 1 [Source:HGNC Symbol;Acc:HGNC:18581]
ENSG00000145794	MEGF10	117.188	-1.39417	0.327003	-4.26349	2.01263e-05	0.000704026	Sig. genes		multiple EGF like domains 10 [Source:HGNC Symbol;Acc:HGNC:29634]
ENSG00000145824	CXCL14	425.625	-0.952494	0.183877	-5.18006	2.2182e-07	1.41381e-05	Sig. genes		C-X-C motif chemokine ligand 14 [Source:HGNC Symbol;Acc:HGNC:10640]
ENSG00000145919	BOD1	247.088	0.292103	0.0876261	3.33352	0.000857559	0.014208	Sig. genes		biorientation of chromosomes in cell division 1 [Source:HGNC Symbol;Acc:HGNC:25114]
ENSG00000146112	PPP1R18	477.224	0.372992	0.108235	3.44612	0.000568691	0.0102489	Sig. genes		protein phosphatase 1 regulatory subunit 18 [Source:HGNC Symbol;Acc:HGNC:29413]
ENSG00000146373	RNF217	251.751	0.687829	0.148022	4.6468	3.37123e-06	0.000144447	Sig. genes		ring finger protein 217 [Source:HGNC Symbol;Acc:HGNC:21487]
ENSG00000146576	C7orf26	108.834	0.351178	0.10878	3.22832	0.00124518	0.0188832	Sig. genes		chromosome 7 open reading frame 26 [Source:HGNC Symbol;Acc:HGNC:21702]
ENSG00000146674	IGFBP3	1383.81	2.49669	0.170106	14.6773	9.01215e-49	8.07038e-45	Sig. genes		insulin like growth factor binding protein 3 [Source:HGNC Symbol;Acc:HGNC:5472]
ENSG00000146859	TMEM140	29.1965	1.29787	0.422717	3.0703	0.00213841	0.0286669	Sig. genes		transmembrane protein 140 [Source:HGNC Symbol;Acc:HGNC:21870]
ENSG00000146938	NLGN4X	71.0769	-0.5316	0.175927	-3.02171	0.0025135	0.0323397	Sig. genes		neuroligin 4 X-linked [Source:HGNC Symbol;Acc:HGNC:14287]
ENSG00000147065	MSN	993.018	0.340051	0.101314	3.35641	0.000789626	0.0133166	Sig. genes		moesin [Source:HGNC Symbol;Acc:HGNC:7373]
ENSG00000147257	GPC3	26.808	1.10341	0.311189	3.54578	0.00039146	0.00774702	Sig. genes
ENSG00000147408	CSGALNACT1	140.739	-1.3913	0.220167	-6.31929	2.62768e-10	3.5925e-08	Sig. genes
ENSG00000147454	SLC25A37	814.644	0.283115	0.071045	3.985	6.74798e-05	0.00194892	Sig. genes		solute carrier family 25 member 37 [Source:HGNC Symbol;Acc:HGNC:29786]
ENSG00000147649	MTDH	3163.5	0.247975	0.0804701	3.08158	0.00205905	0.0278111	Sig. genes		metadherin [Source:HGNC Symbol;Acc:HGNC:29608]
ENSG00000147650	LRP12	87.172	0.608685	0.125826	4.83752	1.31472e-06	6.4867e-05	Sig. genes		LDL receptor related protein 12 [Source:HGNC Symbol;Acc:HGNC:31708]
ENSG00000147684	NDUFB9	1409.24	-0.228225	0.0537366	-4.2471	2.16555e-05	0.000743008	Sig. genes		NADH:ubiquinone oxidoreductase subunit B9 [Source:HGNC Symbol;Acc:HGNC:7704]
ENSG00000147852	VLDLR	106.064	0.877202	0.148307	5.91477	3.32349e-09	3.39308e-07	Sig. genes		very low density lipoprotein receptor [Source:HGNC Symbol;Acc:HGNC:12698]
ENSG00000147872	PLIN2	844.807	1.38062	0.188073	7.34087	2.12214e-13	5.06767e-11	Sig. genes		perilipin 2 [Source:HGNC Symbol;Acc:HGNC:248]
ENSG00000147883	CDKN2B	73.8363	2.08488	0.309361	6.73931	1.59145e-11	2.7944e-09	Sig. genes		cyclin dependent kinase inhibitor 2B [Source:HGNC Symbol;Acc:HGNC:1788]
ENSG00000147955	SIGMAR1	244.181	-0.308749	0.096971	-3.18393	0.0014529	0.021364	Sig. genes		sigma non-opioid intracellular receptor 1 [Source:HGNC Symbol;Acc:HGNC:8157]
ENSG00000148180	GSN	527.73	-0.399945	0.124984	-3.19998	0.00137437	0.0204274	Sig. genes		gelsolin [Source:HGNC Symbol;Acc:HGNC:4620]
ENSG00000148204	CRB2	165.6	-1.86112	0.251236	-7.40783	1.28381e-13	3.19347e-11	Sig. genes		crumbs cell polarity complex component 2 [Source:HGNC Symbol;Acc:HGNC:18688]
ENSG00000148288	GBGT1	88.5622	-0.750594	0.239917	-3.12856	0.00175665	0.0248621	Sig. genes		globoside alpha-1,3-N-acetylgalactosaminyltransferase 1 (FORS blood group) [Source:HGNC Symbol;Acc:HGNC:20460]
ENSG00000148290	SURF1	290.259	-0.276546	0.0818478	-3.37879	0.000728062	0.012514	Sig. genes		SURF1 cytochrome c oxidase assembly factor [Source:HGNC Symbol;Acc:HGNC:11474]
ENSG00000148303	RPL7A	5659.27	0.219974	0.0579959	3.79293	0.000148878	0.00367781	Sig. genes		ribosomal protein L7a [Source:HGNC Symbol;Acc:HGNC:10364]
ENSG00000148426	PROSER2	320.647	0.527436	0.127258	4.14463	3.40365e-05	0.00111037	Sig. genes		proline and serine rich 2 [Source:HGNC Symbol;Acc:HGNC:23728]
ENSG00000148450	MSRB2	288.143	-0.317505	0.101712	-3.12161	0.00179865	0.0252459	Sig. genes		methionine sulfoxide reductase B2 [Source:HGNC Symbol;Acc:HGNC:17061]
ENSG00000148481	MINDY3	90.5752	-0.479657	0.151801	-3.15979	0.00157884	0.0228594	Sig. genes		MINDY lysine 48 deubiquitinase 3 [Source:HGNC Symbol;Acc:HGNC:23578]
ENSG00000148484	RSU1	244.624	0.284654	0.0786449	3.61948	0.000295193	0.0062493	Sig. genes		Ras suppressor protein 1 [Source:HGNC Symbol;Acc:HGNC:10464]
ENSG00000148516	ZEB1	434.543	0.362235	0.10598	3.41796	0.000630926	0.011127	Sig. genes		zinc finger E-box binding homeobox 1 [Source:HGNC Symbol;Acc:HGNC:11642]
ENSG00000148677	ANKRD1	2232.89	2.02778	0.334269	6.06631	1.30883e-09	1.46507e-07	Sig. genes		ankyrin repeat domain 1 [Source:HGNC Symbol;Acc:HGNC:15819]
ENSG00000148719	DNAJB12	234.186	0.390144	0.104327	3.73961	0.000184305	0.00433757	Sig. genes		DnaJ heat shock protein family (Hsp40) member B12 [Source:HGNC Symbol;Acc:HGNC:14891]
ENSG00000148848	ADAM12	187.962	0.628893	0.168625	3.72955	0.000191825	0.00448526	Sig. genes		ADAM metallopeptidase domain 12 [Source:HGNC Symbol;Acc:HGNC:190]
ENSG00000148948	LRRC4C	7.32853	1.74195	0.578831	3.00942	0.00261748	0.033224	Sig. genes		leucine rich repeat containing 4C [Source:HGNC Symbol;Acc:HGNC:29317]
ENSG00000149131	SERPING1	4601.34	-0.409398	0.100488	-4.07411	4.61905e-05	0.00144376	Sig. genes		serpin family G member 1 [Source:HGNC Symbol;Acc:HGNC:1228]
ENSG00000149257	SERPINH1	324.876	0.398091	0.0830754	4.79192	1.65189e-06	7.92762e-05	Sig. genes		serpin family H member 1 [Source:HGNC Symbol;Acc:HGNC:1546]
ENSG00000149294	NCAM1	3241.75	-0.367848	0.123191	-2.98599	0.00282658	0.0350414	Sig. genes		neural cell adhesion molecule 1 [Source:HGNC Symbol;Acc:HGNC:7656]
ENSG00000149300	C11orf52	46.4428	-0.735669	0.190823	-3.85523	0.00011562	0.00299675	Sig. genes		chromosome 11 open reading frame 52 [Source:HGNC Symbol;Acc:HGNC:30531]
ENSG00000149346	SLX4IP	61.4485	-0.692608	0.204325	-3.38974	0.000699586	0.0121176	Sig. genes		SLX4 interacting protein [Source:HGNC Symbol;Acc:HGNC:16225]
ENSG00000149380	P4HA3	23.5652	1.94303	0.402941	4.82211	1.42046e-06	6.95096e-05	Sig. genes		prolyl 4-hydroxylase subunit alpha 3 [Source:HGNC Symbol;Acc:HGNC:30135]
ENSG00000149489	ROM1	167.577	-0.394154	0.108185	-3.64335	0.000269116	0.00580009	Sig. genes		retinal outer segment membrane protein 1 [Source:HGNC Symbol;Acc:HGNC:10254]
ENSG00000149591	TAGLN	611.275	1.89946	0.239627	7.92673	2.24985e-15	7.90093e-13	Sig. genes		transgelin [Source:HGNC Symbol;Acc:HGNC:11553]
ENSG00000149596	JPH2	16.3001	1.65856	0.541193	3.06464	0.00217933	0.0290848	Sig. genes		junctophilin 2 [Source:HGNC Symbol;Acc:HGNC:14202]
ENSG00000149761	NUDT22	178.277	-0.33036	0.0945952	-3.49235	0.000478786	0.00903643	Sig. genes		nudix hydrolase 22 [Source:HGNC Symbol;Acc:HGNC:28189]
ENSG00000150093	ITGB1	2972.02	0.74358	0.117916	6.30604	2.86271e-10	3.85498e-08	Sig. genes		integrin subunit beta 1 [Source:HGNC Symbol;Acc:HGNC:6153]
ENSG00000150627	WDR17	18.4209	-1.25372	0.331305	-3.78419	0.00015421	0.00376928	Sig. genes		WD repeat domain 17 [Source:HGNC Symbol;Acc:HGNC:16661]
ENSG00000150867	PIP4K2A	80.8997	0.391541	0.131632	2.97451	0.00293452	0.0359489	Sig. genes		phosphatidylinositol-5-phosphate 4-kinase type 2 alpha [Source:HGNC Symbol;Acc:HGNC:8997]
ENSG00000150995	ITPR1	523.931	-0.625766	0.162478	-3.85139	0.000117451	0.00303543	Sig. genes		inositol 1,4,5-trisphosphate receptor type 1 [Source:HGNC Symbol;Acc:HGNC:6180]
ENSG00000151012	SLC7A11	1915.28	0.963361	0.110076	8.7518	2.09981e-18	1.13962e-15	Sig. genes		solute carrier family 7 member 11 [Source:HGNC Symbol;Acc:HGNC:11059]
ENSG00000151067	CACNA1C	77.3024	0.989525	0.216053	4.58002	4.6493e-06	0.000192752	Sig. genes		calcium voltage-gated channel subunit alpha1 C [Source:HGNC Symbol;Acc:HGNC:1390]
ENSG00000151240	DIP2C	267.553	0.512329	0.158144	3.23963	0.00119686	0.0183055	Sig. genes		disco interacting protein 2 homolog C [Source:HGNC Symbol;Acc:HGNC:29150]
ENSG00000151327	FAM177A1	883.802	0.338077	0.0840377	4.02291	5.74827e-05	0.00171872	Sig. genes		family with sequence similarity 177 member A1 [Source:HGNC Symbol;Acc:HGNC:19829]
ENSG00000151348	EXT2	411.276	0.515154	0.0983542	5.23774	1.62558e-07	1.0639e-05	Sig. genes		exostosin glycosyltransferase 2 [Source:HGNC Symbol;Acc:HGNC:3513]
ENSG00000151422	FER	309.701	0.44889	0.102052	4.39866	1.08922e-05	0.000415064	Sig. genes
ENSG00000151458	ANKRD50	83.9086	0.433774	0.134088	3.23499	0.00121648	0.0185348	Sig. genes		ankyrin repeat domain 50 [Source:HGNC Symbol;Acc:HGNC:29223]
ENSG00000151553	FAM160B1	129.858	0.410674	0.140447	2.92405	0.00345508	0.0405589	Sig. genes		FHF complex subunit HOOK interacting protein 2A [Source:HGNC Symbol;Acc:HGNC:29320]
ENSG00000151694	ADAM17	414.71	0.396904	0.0927744	4.27817	1.88438e-05	0.000661752	Sig. genes		ADAM metallopeptidase domain 17 [Source:HGNC Symbol;Acc:HGNC:195]
ENSG00000151789	ZNF385D	343.369	-0.932553	0.257795	-3.61742	0.000297559	0.00629195	Sig. genes		zinc finger protein 385D [Source:HGNC Symbol;Acc:HGNC:26191]
ENSG00000151892	GFRA1	10.6718	4.45717	0.949119	4.69611	2.65157e-06	0.000118449	Sig. genes		GDNF family receptor alpha 1 [Source:HGNC Symbol;Acc:HGNC:4243]
ENSG00000152229	PSTPIP2	90.5477	-0.688812	0.183995	-3.74365	0.000181363	0.00427396	Sig. genes		proline-serine-threonine phosphatase interacting protein 2 [Source:HGNC Symbol;Acc:HGNC:9581]
ENSG00000152234	ATP5F1A	745.203	-0.379822	0.120941	-3.14055	0.00168632	0.0240653	Sig. genes		ATP synthase F1 subunit alpha [Source:HGNC Symbol;Acc:HGNC:823]
ENSG00000152377	SPOCK1	835.241	0.682196	0.119645	5.70183	1.18529e-08	1.04062e-06	Sig. genes		SPARC (osteonectin), cwcv and kazal like domains proteoglycan 1 [Source:HGNC Symbol;Acc:HGNC:11251]
ENSG00000152463	OLAH	25.1961	1.87722	0.306135	6.13199	8.67891e-10	1.0294e-07	Sig. genes		oleoyl-ACP hydrolase [Source:HGNC Symbol;Acc:HGNC:25625]
ENSG00000152518	ZFP36L2	830.78	0.523138	0.146751	3.5648	0.000364128	0.00731935	Sig. genes		ZFP36 ring finger protein like 2 [Source:HGNC Symbol;Acc:HGNC:1108]
ENSG00000152763	DNAI4	123.448	-2.29478	0.598753	-3.83261	0.000126792	0.00322106	Sig. genes		dynein axonemal intermediate chain 4 [Source:HGNC Symbol;Acc:HGNC:26252]
ENSG00000152785	BMP3	198.302	-0.675634	0.166259	-4.06374	4.82916e-05	0.00149897	Sig. genes		bone morphogenetic protein 3 [Source:HGNC Symbol;Acc:HGNC:1070]
ENSG00000152931	PART1	6.22132	1.96593	0.586598	3.35141	0.000804006	0.0134976	Sig. genes		prostate androgen-regulated transcript 1 [Source:HGNC Symbol;Acc:HGNC:17263]
ENSG00000152952	PLOD2	719.14	1.09167	0.140759	7.75563	8.79061e-15	2.81142e-12	Sig. genes		procollagen-lysine,2-oxoglutarate 5-dioxygenase 2 [Source:HGNC Symbol;Acc:HGNC:9082]
ENSG00000153046	CDYL	429.165	0.226133	0.0751156	3.01046	0.00260852	0.0331337	Sig. genes		chromodomain Y like [Source:HGNC Symbol;Acc:HGNC:1811]
ENSG00000153048	CARHSP1	311.593	-0.511341	0.101377	-5.04395	4.56007e-07	2.6412e-05	Sig. genes		calcium regulated heat stable protein 1 [Source:HGNC Symbol;Acc:HGNC:17150]
ENSG00000153066	TXNDC11	137.814	0.337094	0.106747	3.15789	0.00158915	0.022953	Sig. genes		thioredoxin domain containing 11 [Source:HGNC Symbol;Acc:HGNC:28030]
ENSG00000153132	CLGN	19.3079	1.03567	0.307157	3.37178	0.000746845	0.0127633	Sig. genes		calmegin [Source:HGNC Symbol;Acc:HGNC:2060]
ENSG00000153140	CETN3	598.817	-0.237713	0.0792552	-2.99934	0.00270569	0.0341501	Sig. genes		centrin 3 [Source:HGNC Symbol;Acc:HGNC:1868]
ENSG00000153214	TMEM87B	663.391	0.97032	0.14656	6.62063	3.57666e-11	5.57026e-09	Sig. genes		transmembrane protein 87B [Source:HGNC Symbol;Acc:HGNC:25913]
ENSG00000153246	PLA2R1	274.549	1.51685	0.275006	5.5157	3.47389e-08	2.74085e-06	Sig. genes		phospholipase A2 receptor 1 [Source:HGNC Symbol;Acc:HGNC:9042]
ENSG00000153250	RBMS1	1264.6	0.452993	0.116496	3.88847	0.000100877	0.00266869	Sig. genes
ENSG00000153291	SLC25A27	58.798	-0.549625	0.18202	-3.01958	0.00253129	0.0324984	Sig. genes		solute carrier family 25 member 27 [Source:HGNC Symbol;Acc:HGNC:21065]
ENSG00000153317	ASAP1	987.575	0.33203	0.0833295	3.98454	6.76097e-05	0.00194892	Sig. genes		ArfGAP with SH3 domain, ankyrin repeat and PH domain 1 [Source:HGNC Symbol;Acc:HGNC:2720]
ENSG00000153714	LURAP1L	131.482	0.653807	0.181438	3.60348	0.000313991	0.00650876	Sig. genes		leucine rich adaptor protein 1 like [Source:HGNC Symbol;Acc:HGNC:31452]
ENSG00000153721	CNKSR3	73.8781	-0.568822	0.192038	-2.96202	0.00305623	0.0370847	Sig. genes		CNKSR family member 3 [Source:HGNC Symbol;Acc:HGNC:23034]
ENSG00000153879	CEBPG	117.502	0.460284	0.145226	3.16944	0.00152733	0.0222395	Sig. genes		CCAAT enhancer binding protein gamma [Source:HGNC Symbol;Acc:HGNC:1837]
ENSG00000153904	DDAH1	304.195	0.546321	0.144307	3.78582	0.000153204	0.0037536	Sig. genes		dimethylarginine dimethylaminohydrolase 1 [Source:HGNC Symbol;Acc:HGNC:2715]
ENSG00000153944	MSI2	1221.81	-0.408613	0.123806	-3.30044	0.000965335	0.0154092	Sig. genes		musashi RNA binding protein 2 [Source:HGNC Symbol;Acc:HGNC:18585]
ENSG00000153976	HS3ST3A1	155.414	0.529622	0.145507	3.63983	0.000272821	0.00585878	Sig. genes		heparan sulfate-glucosamine 3-sulfotransferase 3A1 [Source:HGNC Symbol;Acc:HGNC:5196]
ENSG00000154099	DNAAF1	29.2132	-1.95439	0.579255	-3.37397	0.000740926	0.0127107	Sig. genes		dynein axonemal assembly factor 1 [Source:HGNC Symbol;Acc:HGNC:30539]
ENSG00000154122	ANKH	1119.2	-0.579327	0.153766	-3.76759	0.00016483	0.00395194	Sig. genes		ANKH inorganic pyrophosphate transport regulator [Source:HGNC Symbol;Acc:HGNC:15492]
ENSG00000154153	RETREG1	553.708	-0.357174	0.118949	-3.00275	0.00267555	0.033889	Sig. genes		reticulophagy regulator 1 [Source:HGNC Symbol;Acc:HGNC:25964]
ENSG00000154277	UCHL1	392.561	1.30418	0.109608	11.8985	1.20429e-32	4.31378e-29	Sig. genes		ubiquitin C-terminal hydrolase L1 [Source:HGNC Symbol;Acc:HGNC:12513]
ENSG00000154447	SH3RF1	254.956	0.621756	0.128933	4.82233	1.41891e-06	6.95096e-05	Sig. genes		SH3 domain containing ring finger 1 [Source:HGNC Symbol;Acc:HGNC:17650]
ENSG00000154639	CXADR	1863.66	-0.601937	0.0944876	-6.37054	1.88361e-10	2.63558e-08	Sig. genes		CXADR Ig-like cell adhesion molecule [Source:HGNC Symbol;Acc:HGNC:2559]
ENSG00000154734	ADAMTS1	19.3687	1.11505	0.301896	3.69349	0.000221198	0.00500841	Sig. genes		ADAM metallopeptidase with thrombospondin type 1 motif 1 [Source:HGNC Symbol;Acc:HGNC:217]
ENSG00000154930	ACSS1	24.3018	-0.680519	0.232121	-2.93174	0.00337067	0.0398473	Sig. genes		acyl-CoA synthetase short chain family member 1 [Source:HGNC Symbol;Acc:HGNC:16091]
ENSG00000154975	CA10	68.911	-1.92204	0.253114	-7.59359	3.11169e-14	8.5739e-12	Sig. genes		carbonic anhydrase 10 [Source:HGNC Symbol;Acc:HGNC:1369]
ENSG00000154978	VOPP1	661.193	0.437028	0.0681235	6.41522	1.40616e-10	1.99875e-08	Sig. genes		VOPP1 WW domain binding protein [Source:HGNC Symbol;Acc:HGNC:34518]
ENSG00000155090	KLF10	78.1342	0.573066	0.157019	3.64966	0.000262588	0.00568676	Sig. genes		Kruppel like factor 10 [Source:HGNC Symbol;Acc:HGNC:11810]
ENSG00000155093	PTPRN2	28.0134	-0.721275	0.23657	-3.04888	0.00229696	0.030272	Sig. genes		protein tyrosine phosphatase receptor type N2 [Source:HGNC Symbol;Acc:HGNC:9677]
ENSG00000155304	HSPA13	205.344	0.41964	0.0969752	4.32729	1.50954e-05	0.000541801	Sig. genes		heat shock protein family A (Hsp70) member 13 [Source:HGNC Symbol;Acc:HGNC:11375]
ENSG00000155465	SLC7A7	25.4877	0.859924	0.270511	3.17889	0.00147841	0.0216826	Sig. genes		solute carrier family 7 member 7 [Source:HGNC Symbol;Acc:HGNC:11065]
ENSG00000156006	NAT2	3.62963	-2.24879	0.631235	-3.56252	0.000367307	0.00737496	Sig. genes		N-acetyltransferase 2 [Source:HGNC Symbol;Acc:HGNC:7646]
ENSG00000156253	RWDD2B	119.06	-0.528593	0.159419	-3.31575	0.000913979	0.0148408	Sig. genes		RWD domain containing 2B [Source:HGNC Symbol;Acc:HGNC:1302]
ENSG00000156411	ATP5MJ	1112.91	-0.172948	0.0572827	-3.0192	0.0025344	0.0325151	Sig. genes		ATP synthase membrane subunit j [Source:HGNC Symbol;Acc:HGNC:1188]
ENSG00000156508	EEF1A1	13867.5	0.336463	0.104586	3.21711	0.0012949	0.0195036	Sig. genes		eukaryotic translation elongation factor 1 alpha 1 [Source:HGNC Symbol;Acc:HGNC:3189]
ENSG00000156804	FBXO32	702.148	0.95144	0.0951046	10.0041	1.46148e-23	1.61649e-20	Sig. genes		F-box protein 32 [Source:HGNC Symbol;Acc:HGNC:16731]
ENSG00000156966	B3GNT7	671.449	-0.575032	0.126309	-4.55258	5.29922e-06	0.000218182	Sig. genes		UDP-GlcNAc:betaGal beta-1,3-N-acetylglucosaminyltransferase 7 [Source:HGNC Symbol;Acc:HGNC:18811]
ENSG00000157168	NRG1	553.194	1.23207	0.178449	6.9043	5.04524e-12	9.31549e-10	Sig. genes		neuregulin 1 [Source:HGNC Symbol;Acc:HGNC:7997]
ENSG00000157227	MMP14	644.283	0.470903	0.140511	3.35137	0.000804128	0.0134976	Sig. genes		matrix metallopeptidase 14 [Source:HGNC Symbol;Acc:HGNC:7160]
ENSG00000157388	CACNA1D	105.266	-0.936146	0.258566	-3.62053	0.000294006	0.00623153	Sig. genes		calcium voltage-gated channel subunit alpha1 D [Source:HGNC Symbol;Acc:HGNC:1391]
ENSG00000157399	ARSL	102.761	-0.47595	0.130259	-3.65387	0.00025832	0.00563522	Sig. genes		arylsulfatase L [Source:HGNC Symbol;Acc:HGNC:719]
ENSG00000157510	AFAP1L1	60.5591	0.511459	0.146847	3.48295	0.000495919	0.00924236	Sig. genes		actin filament associated protein 1 like 1 [Source:HGNC Symbol;Acc:HGNC:26714]
ENSG00000157554	ERG	404.623	-0.578817	0.113048	-5.1201	3.05368e-07	1.84146e-05	Sig. genes
ENSG00000157557	ETS2	468.524	-0.54719	0.105755	-5.17414	2.28957e-07	1.44388e-05	Sig. genes		ETS proto-oncogene 2, transcription factor [Source:HGNC Symbol;Acc:HGNC:3489]
ENSG00000157613	CREB3L1	55.6978	1.30898	0.307646	4.25483	2.0921e-05	0.000726155	Sig. genes		cAMP responsive element binding protein 3 like 1 [Source:HGNC Symbol;Acc:HGNC:18856]
ENSG00000157654	PALM2AKAP2	582.963	0.575128	0.135636	4.24023	2.23294e-05	0.00076175	Sig. genes		PALM2 and AKAP2 fusion [Source:HGNC Symbol;Acc:HGNC:33529]
ENSG00000157657	ZNF618	508.68	-0.581386	0.0985319	-5.90049	3.62432e-09	3.62634e-07	Sig. genes
ENSG00000157680	DGKI	47.3765	1.71182	0.396044	4.32229	1.54421e-05	0.000552032	Sig. genes		diacylglycerol kinase iota [Source:HGNC Symbol;Acc:HGNC:2855]
ENSG00000157837	SPPL3	278.254	0.279503	0.083179	3.36026	0.000778692	0.013157	Sig. genes		signal peptide peptidase like 3 [Source:HGNC Symbol;Acc:HGNC:30424]
ENSG00000157985	AGAP1	113.472	0.482562	0.167361	2.88336	0.00393458	0.0445438	Sig. genes		ArfGAP with GTPase domain, ankyrin repeat and PH domain 1 [Source:HGNC Symbol;Acc:HGNC:16922]
ENSG00000158089	GALNT14	21.5384	-1.59378	0.346782	-4.59592	4.30843e-06	0.00017987	Sig. genes		polypeptide N-acetylgalactosaminyltransferase 14 [Source:HGNC Symbol;Acc:HGNC:22946]
ENSG00000158270	COLEC12	861.607	0.484034	0.170267	2.84279	0.00447205	0.0490474	Sig. genes		collectin subfamily member 12 [Source:HGNC Symbol;Acc:HGNC:16016]
ENSG00000158373	H2BC5	17.5213	-0.96924	0.335585	-2.88821	0.00387443	0.0441419	Sig. genes
ENSG00000158417	EIF5B	3186.53	-0.172272	0.0566502	-3.04097	0.00235817	0.0309186	Sig. genes		eukaryotic translation initiation factor 5B [Source:HGNC Symbol;Acc:HGNC:30793]
ENSG00000158458	NRG2	28.6175	-1.79426	0.267698	-6.70256	2.04797e-11	3.36506e-09	Sig. genes		neuregulin 2 [Source:HGNC Symbol;Acc:HGNC:7998]
ENSG00000159079	CFAP298	324.03	-0.396795	0.109849	-3.61217	0.000303644	0.00636772	Sig. genes		cilia and flagella associated protein 298 [Source:HGNC Symbol;Acc:HGNC:1301]
ENSG00000159082	SYNJ1	345.192	-0.679529	0.137821	-4.93053	8.20073e-07	4.38433e-05	Sig. genes		synaptojanin 1 [Source:HGNC Symbol;Acc:HGNC:11503]
ENSG00000159128	IFNGR2	286.74	0.5968	0.136753	4.36406	1.27669e-05	0.000469518	Sig. genes
ENSG00000159199	ATP5MC1	635.808	-0.541455	0.0889995	-6.0838	1.17369e-09	1.34817e-07	Sig. genes		ATP synthase membrane subunit c locus 1 [Source:HGNC Symbol;Acc:HGNC:841]
ENSG00000159214	CCDC24	56.3652	-0.673582	0.15972	-4.21727	2.4728e-05	0.000829241	Sig. genes		coiled-coil domain containing 24 [Source:HGNC Symbol;Acc:HGNC:28688]
ENSG00000159251	ACTC1	4.872	3.03879	0.741887	4.09603	4.20302e-05	0.00133943	Sig. genes		actin alpha cardiac muscle 1 [Source:HGNC Symbol;Acc:HGNC:143]
ENSG00000159713	TPPP3	6.65755	-1.93425	0.499887	-3.86938	0.00010911	0.00284449	Sig. genes		tubulin polymerization promoting protein family member 3 [Source:HGNC Symbol;Acc:HGNC:24162]
ENSG00000159840	ZYX	374.942	0.570329	0.102144	5.5836	2.3559e-08	1.90924e-06	Sig. genes		zyxin [Source:HGNC Symbol;Acc:HGNC:13200]
ENSG00000160050	CCDC28B	28.0311	-0.808824	0.242109	-3.34074	0.000835544	0.0139206	Sig. genes		coiled-coil domain containing 28B [Source:HGNC Symbol;Acc:HGNC:28163]
ENSG00000160062	ZBTB8A	70.9822	0.5083	0.155369	3.27157	0.00106951	0.0167584	Sig. genes		zinc finger and BTB domain containing 8A [Source:HGNC Symbol;Acc:HGNC:24172]
ENSG00000160111	CPAMD8	165.2	-1.39056	0.197382	-7.04502	1.85438e-12	3.81507e-10	Sig. genes		C3 and PZP like alpha-2-macroglobulin domain containing 8 [Source:HGNC Symbol;Acc:HGNC:23228]
ENSG00000160179	ABCG1	63.2747	-0.819592	0.256911	-3.19018	0.00142185	0.0210631	Sig. genes		ATP binding cassette subfamily G member 1 [Source:HGNC Symbol;Acc:HGNC:73]
ENSG00000160209	PDXK	774.137	0.363636	0.0920592	3.95002	7.81442e-05	0.00218929	Sig. genes		pyridoxal kinase [Source:HGNC Symbol;Acc:HGNC:8819]
ENSG00000160221	GATD3A	177.794	-0.374108	0.107088	-3.49345	0.000476816	0.00903643	Sig. genes		glutamine amidotransferase class 1 domain containing 3 [Source:HGNC Symbol;Acc:HGNC:1273]
ENSG00000160271	RALGDS	137.078	-0.358857	0.101062	-3.55085	0.000383986	0.00763285	Sig. genes		ral guanine nucleotide dissociation stimulator [Source:HGNC Symbol;Acc:HGNC:9842]
ENSG00000160310	PRMT2	808.014	-0.266036	0.0723036	-3.67943	0.000233756	0.0052332	Sig. genes
ENSG00000160401	CFAP157	6.18377	-2.14795	0.629156	-3.41402	0.000640122	0.0112398	Sig. genes		cilia and flagella associated protein 157 [Source:HGNC Symbol;Acc:HGNC:27843]
ENSG00000160471	COX6B2	28.1766	-1.47937	0.398918	-3.70846	0.000208523	0.00478802	Sig. genes		cytochrome c oxidase subunit 6B2 [Source:HGNC Symbol;Acc:HGNC:24380]
ENSG00000161011	SQSTM1	3502.56	0.350325	0.116055	3.01861	0.00253934	0.0325551	Sig. genes		sequestosome 1 [Source:HGNC Symbol;Acc:HGNC:11280]
ENSG00000161013	MGAT4B	458.787	0.303725	0.0886534	3.42598	0.000612577	0.0109019	Sig. genes		alpha-1,3-mannosyl-glycoprotein 4-beta-N-acetylglucosaminyltransferase B [Source:HGNC Symbol;Acc:HGNC:7048]
ENSG00000161048	NAPEPLD	72.6016	-1.01312	0.290256	-3.49043	0.000482253	0.00907263	Sig. genes		N-acyl phosphatidylethanolamine phospholipase D [Source:HGNC Symbol;Acc:HGNC:21683]
ENSG00000161082	CELF5	38.7869	-0.966544	0.293254	-3.29593	0.000980958	0.015603	Sig. genes		CUGBP Elav-like family member 5 [Source:HGNC Symbol;Acc:HGNC:14058]
ENSG00000161091	MFSD12	631.724	0.359843	0.0996478	3.61115	0.000304842	0.00636772	Sig. genes		major facilitator superfamily domain containing 12 [Source:HGNC Symbol;Acc:HGNC:28299]
ENSG00000161638	ITGA5	69.2159	0.777503	0.225523	3.44756	0.000565678	0.010213	Sig. genes		integrin subunit alpha 5 [Source:HGNC Symbol;Acc:HGNC:6141]
ENSG00000161955	TNFSF13	157.042	-0.48669	0.115415	-4.21688	2.47708e-05	0.000829241	Sig. genes		TNF superfamily member 13 [Source:HGNC Symbol;Acc:HGNC:11928]
ENSG00000162244	RPL29	1698.14	0.193457	0.0647806	2.98635	0.0028233	0.0350414	Sig. genes		ribosomal protein L29 [Source:HGNC Symbol;Acc:HGNC:10331]
ENSG00000162390	ACOT11	51.5066	-0.678445	0.218945	-3.0987	0.00194371	0.0266897	Sig. genes		acyl-CoA thioesterase 11 [Source:HGNC Symbol;Acc:HGNC:18156]
ENSG00000162407	PLPP3	3320.08	-0.649019	0.123062	-5.27393	1.33535e-07	9.0591e-06	Sig. genes		phospholipid phosphatase 3 [Source:HGNC Symbol;Acc:HGNC:9229]
ENSG00000162433	AK4	1287.64	-0.226398	0.0780683	-2.9	0.00373167	0.0430633	Sig. genes		adenylate kinase 4 [Source:HGNC Symbol;Acc:HGNC:363]
ENSG00000162458	FBLIM1	384.175	0.612497	0.12783	4.79149	1.65546e-06	7.92762e-05	Sig. genes		filamin binding LIM protein 1 [Source:HGNC Symbol;Acc:HGNC:24686]
ENSG00000162493	PDPN	1414.5	0.661007	0.136139	4.85538	1.20156e-06	5.99443e-05	Sig. genes		podoplanin [Source:HGNC Symbol;Acc:HGNC:29602]
ENSG00000162494	LRRC38	79.4814	1.31247	0.345737	3.79615	0.00014696	0.0036427	Sig. genes		leucine rich repeat containing 38 [Source:HGNC Symbol;Acc:HGNC:27005]
ENSG00000162576	MXRA8	621.797	-0.398237	0.124878	-3.18901	0.00142763	0.0211313	Sig. genes		matrix remodeling associated 8 [Source:HGNC Symbol;Acc:HGNC:7542]
ENSG00000162591	MEGF6	225.275	0.77493	0.138654	5.58893	2.28471e-08	1.85996e-06	Sig. genes		multiple EGF like domains 6 [Source:HGNC Symbol;Acc:HGNC:3232]
ENSG00000162616	DNAJB4	137.233	0.62814	0.166471	3.77328	0.000161118	0.00390477	Sig. genes		DnaJ heat shock protein family (Hsp40) member B4 [Source:HGNC Symbol;Acc:HGNC:14886]
ENSG00000162704	ARPC5	448.111	0.361889	0.111789	3.23726	0.00120685	0.0184425	Sig. genes		actin related protein 2/3 complex subunit 5 [Source:HGNC Symbol;Acc:HGNC:708]
ENSG00000162734	PEA15	1488.71	0.42901	0.0973936	4.40491	1.0583e-05	0.000407615	Sig. genes		proliferation and apoptosis adaptor protein 15 [Source:HGNC Symbol;Acc:HGNC:8822]
ENSG00000162840	MT2P1	9.71838	1.37352	0.42788	3.21006	0.00132708	0.0198563	Sig. genes		metallothionein 2 pseudogene 1 [Source:HGNC Symbol;Acc:HGNC:7407]
ENSG00000162873	KLHDC8A	55.4012	-0.646931	0.201584	-3.20924	0.00133085	0.0198961	Sig. genes		kelch domain containing 8A [Source:HGNC Symbol;Acc:HGNC:25573]
ENSG00000162909	CAPN2	907.931	0.253908	0.0712926	3.56149	0.000368757	0.00738751	Sig. genes		calpain 2 [Source:HGNC Symbol;Acc:HGNC:1479]
ENSG00000162931	TRIM17	8.24353	-1.65183	0.513089	-3.21939	0.00128466	0.0193672	Sig. genes		tripartite motif containing 17 [Source:HGNC Symbol;Acc:HGNC:13430]
ENSG00000162980	ARL5A	1106.37	-0.420892	0.138996	-3.0281	0.00246099	0.03187	Sig. genes		ADP ribosylation factor like GTPase 5A [Source:HGNC Symbol;Acc:HGNC:696]
ENSG00000162998	FRZB	156.201	-1.10006	0.346072	-3.17869	0.0014794	0.0216826	Sig. genes		frizzled related protein [Source:HGNC Symbol;Acc:HGNC:3959]
ENSG00000163050	COQ8A	79.9857	-0.559361	0.152755	-3.66181	0.00025044	0.00550046	Sig. genes		coenzyme Q8A [Source:HGNC Symbol;Acc:HGNC:16812]
ENSG00000163104	SMARCAD1	158.737	-0.531369	0.133366	-3.98428	6.76844e-05	0.00194892	Sig. genes		SWI/SNF-related, matrix-associated actin-dependent regulator of chromatin, subfamily a, containing DEAD/H box 1 [Source:HGNC Symbol;Acc:HGNC:18398]
ENSG00000163110	PDLIM5	2248.19	0.287175	0.0784961	3.65846	0.000253737	0.00555341	Sig. genes		PDZ and LIM domain 5 [Source:HGNC Symbol;Acc:HGNC:17468]
ENSG00000163328	GPR155	206.208	-0.374546	0.110562	-3.38765	0.000704934	0.0121749	Sig. genes		G protein-coupled receptor 155 [Source:HGNC Symbol;Acc:HGNC:22951]
ENSG00000163346	PBXIP1	947.758	-0.488789	0.100088	-4.88361	1.04163e-06	5.37626e-05	Sig. genes		PBX homeobox interacting protein 1 [Source:HGNC Symbol;Acc:HGNC:21199]
ENSG00000163399	ATP1A1	2506.61	-0.690995	0.0792792	-8.71597	2.88286e-18	1.51859e-15	Sig. genes	Endo_marker	ATPase Na+/K+ transporting subunit alpha 1 [Source:HGNC Symbol;Acc:HGNC:799]
ENSG00000163453	IGFBP7	2625.59	0.854769	0.109403	7.81305	5.5822e-15	1.81777e-12	Sig. genes		insulin like growth factor binding protein 7 [Source:HGNC Symbol;Acc:HGNC:5476]
ENSG00000163479	SSR2	374.154	0.283975	0.0895283	3.1719	0.00151445	0.0220797	Sig. genes		signal sequence receptor subunit 2 [Source:HGNC Symbol;Acc:HGNC:11324]
ENSG00000163485	ADORA1	72.4345	0.539241	0.180815	2.98229	0.00286105	0.0353145	Sig. genes		adenosine A1 receptor [Source:HGNC Symbol;Acc:HGNC:262]
ENSG00000163491	NEK10	13.7132	1.71605	0.511138	3.35731	0.000787051	0.0132857	Sig. genes
ENSG00000163531	NFASC	233.46	0.878085	0.154405	5.68689	1.29371e-08	1.12478e-06	Sig. genes		neurofascin [Source:HGNC Symbol;Acc:HGNC:29866]
ENSG00000163535	SGO2	61.3406	0.564977	0.18103	3.1209	0.00180298	0.0252671	Sig. genes		shugoshin 2 [Source:HGNC Symbol;Acc:HGNC:30812]
ENSG00000163536	SERPINI1	229.235	-2.05192	0.213276	-9.62094	6.52298e-22	5.3103e-19	Sig. genes		serpin family I member 1 [Source:HGNC Symbol;Acc:HGNC:8943]
ENSG00000163590	PPM1L	142.645	-0.626424	0.106477	-5.88319	4.02423e-09	4.00411e-07	Sig. genes		protein phosphatase, Mg2+/Mn2+ dependent 1L [Source:HGNC Symbol;Acc:HGNC:16381]
ENSG00000163602	RYBP	597.998	0.320512	0.065687	4.87938	1.06422e-06	5.47708e-05	Sig. genes
ENSG00000163629	PTPN13	289.886	-0.611683	0.158979	-3.84758	0.000119292	0.00306971	Sig. genes		protein tyrosine phosphatase non-receptor type 13 [Source:HGNC Symbol;Acc:HGNC:9646]
ENSG00000163644	PPM1K	206.785	-0.418595	0.144374	-2.89937	0.00373909	0.0430934	Sig. genes		protein phosphatase, Mg2+/Mn2+ dependent 1K [Source:HGNC Symbol;Acc:HGNC:25415]
ENSG00000163807	KIAA1143	339.35	-0.263443	0.0840687	-3.13366	0.00172638	0.0245393	Sig. genes		KIAA1143 [Source:HGNC Symbol;Acc:HGNC:29198]
ENSG00000163817	SLC6A20	82.5379	-1.51166	0.383525	-3.94148	8.09817e-05	0.00225215	Sig. genes		solute carrier family 6 member 20 [Source:HGNC Symbol;Acc:HGNC:30927]
ENSG00000163870	TPRA1	206.485	0.355954	0.113904	3.12504	0.00177779	0.0250514	Sig. genes		transmembrane protein adipocyte associated 1 [Source:HGNC Symbol;Acc:HGNC:30413]
ENSG00000163947	ARHGEF3	274.085	-0.659546	0.133462	-4.94181	7.74011e-07	4.17546e-05	Sig. genes		Rho guanine nucleotide exchange factor 3 [Source:HGNC Symbol;Acc:HGNC:683]
ENSG00000164007	CLDN19	30.8288	-1.61286	0.277406	-5.81408	6.09674e-09	5.83918e-07	Sig. genes		claudin 19 [Source:HGNC Symbol;Acc:HGNC:2040]
ENSG00000164032	H2AZ1	1206.92	0.446862	0.0822869	5.43054	5.61837e-08	4.15806e-06	Sig. genes		H2A.Z variant histone 1 [Source:HGNC Symbol;Acc:HGNC:4741]
ENSG00000164040	PGRMC2	786.317	0.27302	0.0716847	3.80861	0.000139748	0.00349076	Sig. genes		progesterone receptor membrane component 2 [Source:HGNC Symbol;Acc:HGNC:16089]
ENSG00000164054	SHISA5	609.757	-0.491201	0.093326	-5.26329	1.41503e-07	9.56348e-06	Sig. genes
ENSG00000164056	SPRY1	239.426	-0.651144	0.133275	-4.88573	1.03048e-06	5.33405e-05	Sig. genes		sprouty RTK signaling antagonist 1 [Source:HGNC Symbol;Acc:HGNC:11269]
ENSG00000164062	APEH	352.767	-0.392151	0.0786212	-4.98785	6.10561e-07	3.35434e-05	Sig. genes		acylaminoacyl-peptide hydrolase [Source:HGNC Symbol;Acc:HGNC:586]
ENSG00000164089	ETNPPL	117.237	-2.44406	0.388134	-6.29694	3.03584e-10	4.05638e-08	Sig. genes		ethanolamine-phosphate phospho-lyase [Source:HGNC Symbol;Acc:HGNC:14404]
ENSG00000164111	ANXA5	849.477	0.241866	0.0779702	3.10204	0.00192194	0.0264988	Sig. genes		annexin A5 [Source:HGNC Symbol;Acc:HGNC:543]
ENSG00000164171	ITGA2	440.017	0.976285	0.255538	3.8205	0.000133181	0.00335009	Sig. genes		integrin subunit alpha 2 [Source:HGNC Symbol;Acc:HGNC:6137]
ENSG00000164188	RANBP3L	118.524	-2.48858	0.288868	-8.61495	6.9973e-18	3.48116e-15	Sig. genes		RAN binding protein 3 like [Source:HGNC Symbol;Acc:HGNC:26353]
ENSG00000164251	F2RL1	16.0612	1.61164	0.429321	3.75392	0.000174092	0.00414076	Sig. genes		F2R like trypsin receptor 1 [Source:HGNC Symbol;Acc:HGNC:3538]
ENSG00000164266	SPINK1	16.6297	1.60985	0.481646	3.34239	0.000830592	0.0138638	Sig. genes		serine peptidase inhibitor Kazal type 1 [Source:HGNC Symbol;Acc:HGNC:11244]
ENSG00000164283	ESM1	258.02	1.51039	0.279021	5.41316	6.19218e-08	4.52661e-06	Sig. genes		endothelial cell specific molecule 1 [Source:HGNC Symbol;Acc:HGNC:3466]
ENSG00000164284	GRPEL2	73.853	0.870433	0.184031	4.72982	2.24717e-06	0.000102409	Sig. genes		GrpE like 2, mitochondrial [Source:HGNC Symbol;Acc:HGNC:21060]
ENSG00000164294	GPX8	375.945	0.635956	0.160788	3.95525	7.64544e-05	0.00215299	Sig. genes		glutathione peroxidase 8 (putative) [Source:HGNC Symbol;Acc:HGNC:33100]
ENSG00000164403	SHROOM1	144.119	0.84014	0.215841	3.89241	9.92549e-05	0.00264532	Sig. genes		shroom family member 1 [Source:HGNC Symbol;Acc:HGNC:24084]
ENSG00000164465	DCBLD1	38.8467	0.704125	0.23756	2.96399	0.00303675	0.0369987	Sig. genes		discoidin, CUB and LCCL domain containing 1 [Source:HGNC Symbol;Acc:HGNC:21479]
ENSG00000164574	GALNT10	885.216	0.487535	0.110697	4.40425	1.06152e-05	0.00040798	Sig. genes		polypeptide N-acetylgalactosaminyltransferase 10 [Source:HGNC Symbol;Acc:HGNC:19873]
ENSG00000164587	RPS14	7857.27	0.31637	0.0873283	3.62277	0.000291466	0.00618501	Sig. genes		ribosomal protein S14 [Source:HGNC Symbol;Acc:HGNC:10387]
ENSG00000164626	KCNK5	159.902	-1.15328	0.152314	-7.57176	3.68208e-14	9.99182e-12	Sig. genes		potassium two pore domain channel subfamily K member 5 [Source:HGNC Symbol;Acc:HGNC:6280]
ENSG00000164674	SYTL3	15.2374	-1.70199	0.457002	-3.72424	0.000195902	0.00456849	Sig. genes		synaptotagmin like 3 [Source:HGNC Symbol;Acc:HGNC:15587]
ENSG00000164694	FNDC1	159.427	3.66925	0.334692	10.9631	5.75219e-28	9.36561e-25	Sig. genes		fibronectin type III domain containing 1 [Source:HGNC Symbol;Acc:HGNC:21184]
ENSG00000164713	BRI3	1321.71	0.41303	0.0827887	4.98897	6.07035e-07	3.35434e-05	Sig. genes		brain protein I3 [Source:HGNC Symbol;Acc:HGNC:1109]
ENSG00000164733	CTSB	2516.76	0.273409	0.0754389	3.62424	0.000289814	0.00615727	Sig. genes		cathepsin B [Source:HGNC Symbol;Acc:HGNC:2527]
ENSG00000164741	DLC1	120.017	1.00088	0.334057	2.99615	0.00273414	0.034388	Sig. genes		DLC1 Rho GTPase activating protein [Source:HGNC Symbol;Acc:HGNC:2897]
ENSG00000164761	TNFRSF11B	106.185	1.02797	0.275628	3.72954	0.000191832	0.00448526	Sig. genes		TNF receptor superfamily member 11b [Source:HGNC Symbol;Acc:HGNC:11909]
ENSG00000164823	OSGIN2	180.916	0.405907	0.141075	2.87724	0.00401171	0.04516	Sig. genes		oxidative stress induced growth inhibitor family member 2 [Source:HGNC Symbol;Acc:HGNC:1355]
ENSG00000164849	GPR146	30.3894	-0.952972	0.273458	-3.48489	0.000492341	0.00920429	Sig. genes		G protein-coupled receptor 146 [Source:HGNC Symbol;Acc:HGNC:21718]
ENSG00000164879	CA3	3207	-1.61271	0.164002	-9.8335	8.07614e-23	7.06436e-20	Sig. genes		carbonic anhydrase 3 [Source:HGNC Symbol;Acc:HGNC:1374]
ENSG00000164932	CTHRC1	67.5104	1.29215	0.322445	4.00734	6.14053e-05	0.00182081	Sig. genes		collagen triple helix repeat containing 1 [Source:HGNC Symbol;Acc:HGNC:18831]
ENSG00000164933	SLC25A32	135.088	0.400824	0.107745	3.72012	0.000199127	0.00462563	Sig. genes		solute carrier family 25 member 32 [Source:HGNC Symbol;Acc:HGNC:29683]
ENSG00000165124	SVEP1	633.697	0.577691	0.135931	4.24987	2.13893e-05	0.000736695	Sig. genes
ENSG00000165280	VCP	722.525	0.233722	0.0749585	3.11802	0.0018207	0.0254578	Sig. genes		valosin containing protein [Source:HGNC Symbol;Acc:HGNC:12666]
ENSG00000165323	FAT3	4.56217	3.03808	0.77212	3.93472	8.32927e-05	0.00229151	Sig. genes		FAT atypical cadherin 3 [Source:HGNC Symbol;Acc:HGNC:23112]
ENSG00000165449	SLC16A9	80.9534	0.874741	0.287043	3.04742	0.00230815	0.0303963	Sig. genes		solute carrier family 16 member 9 [Source:HGNC Symbol;Acc:HGNC:23520]
ENSG00000165487	MICU2	133.014	-0.387858	0.131128	-2.95785	0.00309796	0.0374056	Sig. genes		mitochondrial calcium uptake 2 [Source:HGNC Symbol;Acc:HGNC:31830]
ENSG00000165757	JCAD	205.856	0.792577	0.19895	3.98379	6.78247e-05	0.00194982	Sig. genes		junctional cadherin 5 associated [Source:HGNC Symbol;Acc:HGNC:29283]
ENSG00000165795	NDRG2	314.763	-0.565086	0.0927121	-6.09506	1.09395e-09	1.28057e-07	Sig. genes
ENSG00000165801	ARHGEF40	180.007	0.349096	0.0999736	3.49188	0.000479629	0.00903643	Sig. genes		Rho guanine nucleotide exchange factor 40 [Source:HGNC Symbol;Acc:HGNC:25516]
ENSG00000165821	SALL2	178.469	-0.51229	0.173384	-2.95465	0.00313024	0.0376764	Sig. genes		spalt like transcription factor 2 [Source:HGNC Symbol;Acc:HGNC:10526]
ENSG00000165891	E2F7	6.7232	1.78813	0.54609	3.27443	0.00105877	0.0166338	Sig. genes		E2F transcription factor 7 [Source:HGNC Symbol;Acc:HGNC:23820]
ENSG00000166012	TAF1D	599.739	0.29544	0.0882277	3.34861	0.000812195	0.0135951	Sig. genes		TATA-box binding protein associated factor, RNA polymerase I subunit D [Source:HGNC Symbol;Acc:HGNC:28759]
ENSG00000166123	GPT2	118.186	0.579814	0.15608	3.71485	0.000203321	0.00469868	Sig. genes		glutamic--pyruvic transaminase 2 [Source:HGNC Symbol;Acc:HGNC:18062]
ENSG00000166136	NDUFB8	777.472	-0.235397	0.0745814	-3.15625	0.00159814	0.0230456	Sig. genes		NADH:ubiquinone oxidoreductase subunit B8 [Source:HGNC Symbol;Acc:HGNC:7703]
ENSG00000166147	FBN1	361.331	0.505871	0.112853	4.48255	7.37564e-06	0.000292899	Sig. genes		fibrillin 1 [Source:HGNC Symbol;Acc:HGNC:3603]
ENSG00000166165	CKB	101.992	-0.83091	0.223529	-3.71724	0.000201413	0.0046606	Sig. genes
ENSG00000166224	SGPL1	233.958	0.556544	0.146861	3.7896	0.000150889	0.00370196	Sig. genes		sphingosine-1-phosphate lyase 1 [Source:HGNC Symbol;Acc:HGNC:10817]
ENSG00000166265	CYYR1	104.363	-0.942969	0.25025	-3.76811	0.000164486	0.00394898	Sig. genes		cysteine and tyrosine rich 1 [Source:HGNC Symbol;Acc:HGNC:16274]
ENSG00000166272	WBP1L	446.335	0.560637	0.13044	4.29805	1.72311e-05	0.00061232	Sig. genes		WW domain binding protein 1 like [Source:HGNC Symbol;Acc:HGNC:23510]
ENSG00000166292	TMEM100	137.243	-0.60281	0.161246	-3.73845	0.000185162	0.00435203	Sig. genes		transmembrane protein 100 [Source:HGNC Symbol;Acc:HGNC:25607]
ENSG00000166340	TPP1	648.067	0.284326	0.0844294	3.36762	0.000758213	0.0129084	Sig. genes		tripeptidyl peptidase 1 [Source:HGNC Symbol;Acc:HGNC:2073]
ENSG00000166398	GARRE1	709.216	0.464711	0.110133	4.21953	2.44808e-05	0.00082261	Sig. genes		granule associated Rac and RHOG effector 1 [Source:HGNC Symbol;Acc:HGNC:29016]
ENSG00000166441	RPL27A	9478.3	0.211254	0.052085	4.05594	4.9933e-05	0.00153396	Sig. genes		ribosomal protein L27a [Source:HGNC Symbol;Acc:HGNC:10329]
ENSG00000166448	TMEM130	1199.77	-0.634133	0.165387	-3.83424	0.000125955	0.00320681	Sig. genes		transmembrane protein 130 [Source:HGNC Symbol;Acc:HGNC:25429]
ENSG00000166471	TMEM41B	117.128	0.343059	0.106092	3.23359	0.00122243	0.0186013	Sig. genes		transmembrane protein 41B [Source:HGNC Symbol;Acc:HGNC:28948]
ENSG00000166482	MFAP4	38.9213	0.993519	0.340437	2.91836	0.00351873	0.0411092	Sig. genes		microfibril associated protein 4 [Source:HGNC Symbol;Acc:HGNC:7035]
ENSG00000166501	PRKCB	179.443	-0.777628	0.166065	-4.68267	2.83161e-06	0.000124299	Sig. genes		protein kinase C beta [Source:HGNC Symbol;Acc:HGNC:9395]
ENSG00000166508	MCM7	149.082	0.402173	0.138887	2.89569	0.00378331	0.0434631	Sig. genes		minichromosome maintenance complex component 7 [Source:HGNC Symbol;Acc:HGNC:6950]
ENSG00000166532	RIMKLB	120.322	0.649485	0.219977	2.95251	0.00315202	0.0378606	Sig. genes		ribosomal modification protein rimK like family member B [Source:HGNC Symbol;Acc:HGNC:29228]
ENSG00000166681	BEX3	752	-0.367317	0.0919805	-3.99342	6.51268e-05	0.00189662	Sig. genes		brain expressed X-linked 3 [Source:HGNC Symbol;Acc:HGNC:13388]
ENSG00000166794	PPIB	237.012	0.372797	0.120353	3.09753	0.00195138	0.0267605	Sig. genes		peptidylprolyl isomerase B [Source:HGNC Symbol;Acc:HGNC:9255]
ENSG00000166833	NAV2	308.521	0.612988	0.163423	3.75093	0.000176183	0.00416835	Sig. genes
ENSG00000166847	DCTN5	467.201	0.326727	0.107925	3.02734	0.00246712	0.0319034	Sig. genes		dynactin subunit 5 [Source:HGNC Symbol;Acc:HGNC:24594]
ENSG00000166863	TAC3	45.587	-1.05025	0.33058	-3.17699	0.00148814	0.021775	Sig. genes		tachykinin precursor 3 [Source:HGNC Symbol;Acc:HGNC:11521]
ENSG00000166886	NAB2	87.9399	0.4294	0.150217	2.85854	0.004256	0.0472567	Sig. genes		NGFI-A binding protein 2 [Source:HGNC Symbol;Acc:HGNC:7627]
ENSG00000166889	PATL1	142.361	0.3933	0.109177	3.60239	0.0003153	0.00652834	Sig. genes		PAT1 homolog 1, processing body mRNA decay factor [Source:HGNC Symbol;Acc:HGNC:26721]
ENSG00000166949	SMAD3	594.914	-0.627791	0.0866155	-7.24803	4.2289e-13	9.42963e-11	Sig. genes		SMAD family member 3 [Source:HGNC Symbol;Acc:HGNC:6769]
ENSG00000166974	MAPRE2	425.37	-0.3717	0.109863	-3.38331	0.000716176	0.0123391	Sig. genes		microtubule associated protein RP/EB family member 2 [Source:HGNC Symbol;Acc:HGNC:6891]
ENSG00000167193	CRK	393.617	0.214821	0.0697777	3.07865	0.0020794	0.0280266	Sig. genes		CRK proto-oncogene, adaptor protein [Source:HGNC Symbol;Acc:HGNC:2362]
ENSG00000167323	STIM1	381.26	-0.371807	0.0854834	-4.34947	1.36469e-05	0.000495774	Sig. genes		stromal interaction molecule 1 [Source:HGNC Symbol;Acc:HGNC:11386]
ENSG00000167380	ZNF226	115.265	-0.937157	0.172966	-5.41816	6.02164e-08	4.41998e-06	Sig. genes		zinc finger protein 226 [Source:HGNC Symbol;Acc:HGNC:13019]
ENSG00000167460	TPM4	2433.18	0.616928	0.123678	4.98817	6.09524e-07	3.35434e-05	Sig. genes		tropomyosin 4 [Source:HGNC Symbol;Acc:HGNC:12013]
ENSG00000167522	ANKRD11	1830.3	0.346313	0.0712887	4.85789	1.18642e-06	5.95738e-05	Sig. genes
ENSG00000167526	RPL13	5189.16	0.217883	0.0587406	3.70923	0.000207888	0.00478569	Sig. genes		ribosomal protein L13 [Source:HGNC Symbol;Acc:HGNC:10303]
ENSG00000167601	AXL	578.014	0.627835	0.125292	5.01097	5.41556e-07	3.04052e-05	Sig. genes		AXL receptor tyrosine kinase [Source:HGNC Symbol;Acc:HGNC:905]
ENSG00000167619	TMEM145	5.03395	-1.8564	0.590013	-3.14638	0.00165308	0.0236853	Sig. genes		transmembrane protein 145 [Source:HGNC Symbol;Acc:HGNC:26912]
ENSG00000167657	DAPK3	341.867	0.44998	0.0714727	6.29583	3.05757e-10	4.05638e-08	Sig. genes		death associated protein kinase 3 [Source:HGNC Symbol;Acc:HGNC:2676]
ENSG00000167658	EEF2	6092.22	0.232423	0.0616331	3.77108	0.000162543	0.00392337	Sig. genes		eukaryotic translation elongation factor 2 [Source:HGNC Symbol;Acc:HGNC:3214]
ENSG00000167700	MFSD3	82.0331	-0.591593	0.140713	-4.20425	2.61953e-05	0.000868812	Sig. genes		major facilitator superfamily domain containing 3 [Source:HGNC Symbol;Acc:HGNC:25157]
ENSG00000167733	HSD11B1L	78.7978	-0.518449	0.147028	-3.52619	0.00042158	0.00818927	Sig. genes		hydroxysteroid 11-beta dehydrogenase 1 like [Source:HGNC Symbol;Acc:HGNC:30419]
ENSG00000167772	ANGPTL4	236.25	2.84313	0.246632	11.5278	9.55551e-31	2.82793e-27	Sig. genes		angiopoietin like 4 [Source:HGNC Symbol;Acc:HGNC:16039]
ENSG00000167792	NDUFV1	468.549	-0.295942	0.060005	-4.93195	8.14148e-07	4.36622e-05	Sig. genes		NADH:ubiquinone oxidoreductase core subunit V1 [Source:HGNC Symbol;Acc:HGNC:7716]
ENSG00000167863	ATP5PD	401.098	-0.355629	0.103846	-3.42459	0.000615738	0.0109403	Sig. genes		ATP synthase peripheral stalk subunit d [Source:HGNC Symbol;Acc:HGNC:845]
ENSG00000167964	RAB26	10.8053	-1.75629	0.476553	-3.68541	0.000228335	0.0051311	Sig. genes		RAB26, member RAS oncogene family [Source:HGNC Symbol;Acc:HGNC:14259]
ENSG00000167971	CASKIN1	27.9155	-0.833067	0.252102	-3.30449	0.000951503	0.0152975	Sig. genes		CASK interacting protein 1 [Source:HGNC Symbol;Acc:HGNC:20879]
ENSG00000167995	BEST1	35.6591	0.747883	0.213859	3.49708	0.000470373	0.00892413	Sig. genes		bestrophin 1 [Source:HGNC Symbol;Acc:HGNC:12703]
ENSG00000167996	FTH1	27175.8	0.536831	0.114315	4.69608	2.65205e-06	0.000118449	Sig. genes		ferritin heavy chain 1 [Source:HGNC Symbol;Acc:HGNC:3976]
ENSG00000168000	BSCL2	459.006	-0.405315	0.0762227	-5.31751	1.05195e-07	7.30247e-06	Sig. genes		BSCL2 lipid droplet biogenesis associated, seipin [Source:HGNC Symbol;Acc:HGNC:15832]
ENSG00000168003	SLC3A2	1229.83	0.695416	0.0939031	7.40568	1.30484e-13	3.20132e-11	Sig. genes		solute carrier family 3 member 2 [Source:HGNC Symbol;Acc:HGNC:11026]
ENSG00000168028	RPSA	3455.65	0.206626	0.0545176	3.79007	0.000150607	0.00370014	Sig. genes		ribosomal protein SA [Source:HGNC Symbol;Acc:HGNC:6502]
ENSG00000168071	CCDC88B	19.5078	-0.841907	0.288341	-2.91983	0.00350219	0.0409962	Sig. genes		coiled-coil domain containing 88B [Source:HGNC Symbol;Acc:HGNC:26757]
ENSG00000168101	NUDT16L1	145.772	-0.34175	0.0978729	-3.49177	0.000479824	0.00903643	Sig. genes		nudix hydrolase 16 like 1 [Source:HGNC Symbol;Acc:HGNC:28154]
ENSG00000168135	KCNJ4	171.555	-0.498228	0.15796	-3.15415	0.00160969	0.0231854	Sig. genes		potassium inwardly rectifying channel subfamily J member 4 [Source:HGNC Symbol;Acc:HGNC:6265]
ENSG00000168159	RNF187	1531.89	0.307563	0.0969403	3.17271	0.00151023	0.0220622	Sig. genes
ENSG00000168172	HOOK3	1024.59	-0.530053	0.120591	-4.39547	1.10531e-05	0.000419252	Sig. genes		hook microtubule tethering protein 3 [Source:HGNC Symbol;Acc:HGNC:23576]
ENSG00000168209	DDIT4	465.834	0.765202	0.168579	4.53914	5.64848e-06	0.000230969	Sig. genes		DNA damage inducible transcript 4 [Source:HGNC Symbol;Acc:HGNC:24944]
ENSG00000168264	IRF2BP2	695.823	0.396172	0.0935209	4.23618	2.27352e-05	0.000768779	Sig. genes		interferon regulatory factor 2 binding protein 2 [Source:HGNC Symbol;Acc:HGNC:21729]
ENSG00000168374	ARF4	516.008	0.405694	0.113688	3.56848	0.000359055	0.00724674	Sig. genes		ADP ribosylation factor 4 [Source:HGNC Symbol;Acc:HGNC:655]
ENSG00000168389	MFSD2A	34.8629	0.78742	0.258598	3.04496	0.00232711	0.0305786	Sig. genes		major facilitator superfamily domain containing 2A [Source:HGNC Symbol;Acc:HGNC:25897]
ENSG00000168517	HEXIM2	41.8702	-0.69106	0.229444	-3.0119	0.00259622	0.0330609	Sig. genes		HEXIM P-TEFb complex subunit 2 [Source:HGNC Symbol;Acc:HGNC:28591]
ENSG00000168546	GFRA2	9.80106	4.07259	0.762534	5.34087	9.25021e-08	6.49691e-06	Sig. genes		GDNF family receptor alpha 2 [Source:HGNC Symbol;Acc:HGNC:4244]
ENSG00000168621	GDNF	67.2608	1.41423	0.291621	4.84955	1.23744e-06	6.14082e-05	Sig. genes		glial cell derived neurotrophic factor [Source:HGNC Symbol;Acc:HGNC:4232]
ENSG00000168675	LDLRAD4	239.805	1.00652	0.162641	6.18857	6.07112e-10	7.49888e-08	Sig. genes		low density lipoprotein receptor class A domain containing 4 [Source:HGNC Symbol;Acc:HGNC:1224]
ENSG00000168743	NPNT	73.9913	-1.43335	0.259055	-5.53299	3.14824e-08	2.49491e-06	Sig. genes		nephronectin [Source:HGNC Symbol;Acc:HGNC:27405]
ENSG00000168765	GSTM4	163.966	-0.690873	0.115313	-5.99126	2.08216e-09	2.27387e-07	Sig. genes
ENSG00000168993	CPLX1	47.9511	-0.721335	0.228175	-3.16133	0.00157051	0.0227755	Sig. genes		complexin 1 [Source:HGNC Symbol;Acc:HGNC:2309]
ENSG00000168994	PXDC1	152.954	0.882462	0.160638	5.49349	3.94071e-08	3.05533e-06	Sig. genes		PX domain containing 1 [Source:HGNC Symbol;Acc:HGNC:21361]
ENSG00000169020	ATP5ME	932.293	-0.34577	0.101061	-3.4214	0.000622998	0.0110256	Sig. genes		ATP synthase membrane subunit e [Source:HGNC Symbol;Acc:HGNC:846]
ENSG00000169064	ZBBX	5.66976	-2.31336	0.72186	-3.20472	0.00135192	0.0201607	Sig. genes		zinc finger B-box domain containing [Source:HGNC Symbol;Acc:HGNC:26245]
ENSG00000169083	AR	116.308	0.97192	0.279839	3.47314	0.000514399	0.00947828	Sig. genes		androgen receptor [Source:HGNC Symbol;Acc:HGNC:644]
ENSG00000169129	AFAP1L2	157.004	-0.687947	0.130854	-5.25735	1.46146e-07	9.80328e-06	Sig. genes
ENSG00000169213	RAB3B	62.4527	1.55441	0.310843	5.00062	5.71473e-07	3.19846e-05	Sig. genes		RAB3B, member RAS oncogene family [Source:HGNC Symbol;Acc:HGNC:9778]
ENSG00000169252	ADRB2	394.493	-0.693523	0.136132	-5.0945	3.49665e-07	2.06683e-05	Sig. genes		adrenoceptor beta 2 [Source:HGNC Symbol;Acc:HGNC:286]
ENSG00000169435	RASSF6	217.466	-1.49174	0.297653	-5.01169	5.39546e-07	3.03876e-05	Sig. genes		Ras association domain family member 6 [Source:HGNC Symbol;Acc:HGNC:20796]
ENSG00000169439	SDC2	374.212	-0.323973	0.0967487	-3.3486	0.000812215	0.0135951	Sig. genes		syndecan 2 [Source:HGNC Symbol;Acc:HGNC:10659]
ENSG00000169504	CLIC4	257.836	0.603436	0.131674	4.58279	4.58805e-06	0.000190654	Sig. genes		chloride intracellular channel 4 [Source:HGNC Symbol;Acc:HGNC:13518]
ENSG00000169515	CCDC8	79.5065	-0.526724	0.180682	-2.91521	0.00355452	0.0413654	Sig. genes		coiled-coil domain containing 8 [Source:HGNC Symbol;Acc:HGNC:25367]
ENSG00000169604	ANTXR1	337.713	0.544776	0.146037	3.7304	0.000191172	0.00448154	Sig. genes		ANTXR cell adhesion molecule 1 [Source:HGNC Symbol;Acc:HGNC:21014]
ENSG00000169621	APLF	68.1063	0.418721	0.143571	2.91648	0.00354009	0.041278	Sig. genes		aprataxin and PNKP like factor [Source:HGNC Symbol;Acc:HGNC:28724]
ENSG00000169738	DCXR	231.045	-0.386367	0.111696	-3.45911	0.000541958	0.00985429	Sig. genes		dicarbonyl and L-xylulose reductase [Source:HGNC Symbol;Acc:HGNC:18985]
ENSG00000169756	LIMS1	687.855	0.336464	0.0824095	4.08283	4.44904e-05	0.00140533	Sig. genes
ENSG00000169851	PCDH7	2742.08	-0.69285	0.118858	-5.8292	5.56935e-09	5.39173e-07	Sig. genes
ENSG00000169871	TRIM56	1677.89	0.238114	0.0612083	3.89023	0.00010015	0.00265731	Sig. genes		tripartite motif containing 56 [Source:HGNC Symbol;Acc:HGNC:19028]
ENSG00000169891	REPS2	97.6587	-0.925156	0.313366	-2.95232	0.00315399	0.0378606	Sig. genes		RALBP1 associated Eps domain containing 2 [Source:HGNC Symbol;Acc:HGNC:9963]
ENSG00000169908	TM4SF1	4154.35	-0.670192	0.0808071	-8.29373	1.0975e-16	4.46731e-14	Sig. genes		transmembrane 4 L six family member 1 [Source:HGNC Symbol;Acc:HGNC:11853]
ENSG00000170004	CHD3	455.879	-0.665606	0.199844	-3.33062	0.000866515	0.0143035	Sig. genes		chromodomain helicase DNA binding protein 3 [Source:HGNC Symbol;Acc:HGNC:1918]
ENSG00000170017	ALCAM	4402.89	-0.364373	0.100391	-3.62953	0.000283934	0.0060611	Sig. genes		activated leukocyte cell adhesion molecule [Source:HGNC Symbol;Acc:HGNC:400]
ENSG00000170175	CHRNB1	156.94	0.371409	0.108898	3.41062	0.000648153	0.0113363	Sig. genes		cholinergic receptor nicotinic beta 1 subunit [Source:HGNC Symbol;Acc:HGNC:1961]
ENSG00000170271	FAXDC2	59.5078	-1.23874	0.2523	-4.90978	9.11778e-07	4.80293e-05	Sig. genes		fatty acid hydroxylase domain containing 2 [Source:HGNC Symbol;Acc:HGNC:1334]
ENSG00000170275	CRTAP	837.404	0.281346	0.0590523	4.76436	1.89458e-06	8.79066e-05	Sig. genes		cartilage associated protein [Source:HGNC Symbol;Acc:HGNC:2379]
ENSG00000170293	CMTM8	72.9632	0.546487	0.19093	2.86224	0.00420656	0.0469057	Sig. genes		CKLF like MARVEL transmembrane domain containing 8 [Source:HGNC Symbol;Acc:HGNC:19179]
ENSG00000170370	EMX2	941.546	-0.40434	0.113043	-3.57686	0.000347748	0.00706943	Sig. genes		empty spiracles homeobox 2 [Source:HGNC Symbol;Acc:HGNC:3341]
ENSG00000170373	CST1	50.5509	3.97251	0.792336	5.01366	5.34037e-07	3.01722e-05	Sig. genes		cystatin SN [Source:HGNC Symbol;Acc:HGNC:2473]
ENSG00000170421	KRT8	233.42	0.438241	0.137716	3.18221	0.00146158	0.0214741	Sig. genes
ENSG00000170558	CDH2	1667.72	0.693678	0.112492	6.16647	6.98303e-10	8.33773e-08	Sig. genes	Endo_marker	cadherin 2 [Source:HGNC Symbol;Acc:HGNC:1759]
ENSG00000170776	AKAP13	1081.73	-0.432629	0.0711156	-6.08347	1.17612e-09	1.34817e-07	Sig. genes		A-kinase anchoring protein 13 [Source:HGNC Symbol;Acc:HGNC:371]
ENSG00000170927	PKHD1	54.8683	-1.23453	0.307062	-4.02046	5.80858e-05	0.00173098	Sig. genes		PKHD1 ciliary IPT domain containing fibrocystin/polyductin [Source:HGNC Symbol;Acc:HGNC:9016]
ENSG00000171130	ATP6V0E2	157.073	-0.509088	0.152806	-3.33159	0.000863499	0.01428	Sig. genes		ATPase H+ transporting V0 subunit e2 [Source:HGNC Symbol;Acc:HGNC:21723]
ENSG00000171132	PRKCE	58.7696	-1.31207	0.37052	-3.54116	0.000398376	0.00784057	Sig. genes		protein kinase C epsilon [Source:HGNC Symbol;Acc:HGNC:9401]
ENSG00000171208	NETO2	26.7354	1.05603	0.353051	2.99116	0.00277918	0.0347591	Sig. genes		neuropilin and tolloid like 2 [Source:HGNC Symbol;Acc:HGNC:14644]
ENSG00000171219	CDC42BPG	34.5455	-0.817838	0.278084	-2.94098	0.0032718	0.0389355	Sig. genes		CDC42 binding protein kinase gamma [Source:HGNC Symbol;Acc:HGNC:29829]
ENSG00000171223	JUNB	351.298	0.753893	0.145957	5.16518	2.40207e-07	1.49567e-05	Sig. genes		JunB proto-oncogene, AP-1 transcription factor subunit [Source:HGNC Symbol;Acc:HGNC:6205]
ENSG00000171307	ZDHHC16	111.586	0.384147	0.134941	2.84679	0.00441629	0.0486743	Sig. genes		zinc finger DHHC-type palmitoyltransferase 16 [Source:HGNC Symbol;Acc:HGNC:20714]
ENSG00000171408	PDE7B	97.491	-0.973965	0.168608	-5.7765	7.62703e-09	7.00513e-07	Sig. genes		phosphodiesterase 7B [Source:HGNC Symbol;Acc:HGNC:8792]
ENSG00000171428	NAT1	19.9682	-1.42362	0.293064	-4.85771	1.18748e-06	5.95738e-05	Sig. genes		N-acetyltransferase 1 [Source:HGNC Symbol;Acc:HGNC:7645]
ENSG00000171467	ZNF318	222.088	-0.443064	0.143509	-3.08737	0.00201935	0.0274405	Sig. genes		zinc finger protein 318 [Source:HGNC Symbol;Acc:HGNC:13578]
ENSG00000171488	LRRC8C	40.0802	-0.874488	0.211893	-4.12703	3.67477e-05	0.00119015	Sig. genes		leucine rich repeat containing 8 VRAC subunit C [Source:HGNC Symbol;Acc:HGNC:25075]
ENSG00000171621	SPSB1	82.8186	0.618698	0.130034	4.75796	1.95557e-06	9.05021e-05	Sig. genes		splA/ryanodine receptor domain and SOCS box containing 1 [Source:HGNC Symbol;Acc:HGNC:30628]
ENSG00000171658	NMRAL2P	25.2434	1.40831	0.422751	3.33129	0.000864437	0.0142823	Sig. genes		NmrA like redox sensor 2, pseudogene [Source:HGNC Symbol;Acc:HGNC:52332]
ENSG00000171680	PLEKHG5	310.669	-0.630726	0.112786	-5.59226	2.24135e-08	1.833e-06	Sig. genes		pleckstrin homology and RhoGEF domain containing G5 [Source:HGNC Symbol;Acc:HGNC:29105]
ENSG00000171793	CTPS1	200.482	0.695049	0.158874	4.37483	1.21526e-05	0.000450627	Sig. genes
ENSG00000171819	ANGPTL7	772.617	-0.837658	0.244458	-3.4266	0.000611199	0.0108921	Sig. genes		angiopoietin like 7 [Source:HGNC Symbol;Acc:HGNC:24078]
ENSG00000171858	RPS21	4215.48	0.196567	0.0594351	3.30726	0.00094215	0.015188	Sig. genes		ribosomal protein S21 [Source:HGNC Symbol;Acc:HGNC:10409]
ENSG00000171867	PRNP	909.208	0.418434	0.087394	4.7879	1.68539e-06	7.96445e-05	Sig. genes		prion protein [Source:HGNC Symbol;Acc:HGNC:9449]
ENSG00000171992	SYNPO	676.938	0.315614	0.0972578	3.24512	0.00117399	0.0180328	Sig. genes		synaptopodin [Source:HGNC Symbol;Acc:HGNC:30672]
ENSG00000172005	MAL	502.069	-1.38694	0.22487	-6.16776	6.92649e-10	8.32573e-08	Sig. genes		mal, T cell differentiation protein [Source:HGNC Symbol;Acc:HGNC:6817]
ENSG00000172059	KLF11	45.614	0.643548	0.226626	2.83969	0.00451576	0.0493454	Sig. genes		Kruppel like factor 11 [Source:HGNC Symbol;Acc:HGNC:11811]
ENSG00000172159	FRMD3	244.07	-1.28303	0.191182	-6.71105	1.9323e-11	3.23434e-09	Sig. genes		FERM domain containing 3 [Source:HGNC Symbol;Acc:HGNC:24125]
ENSG00000172201	ID4	129.169	-0.635505	0.170828	-3.72015	0.000199105	0.00462563	Sig. genes		inhibitor of DNA binding 4, HLH protein [Source:HGNC Symbol;Acc:HGNC:5363]
ENSG00000172216	CEBPB	194.536	0.393125	0.105971	3.70975	0.000207464	0.00478208	Sig. genes		CCAAT enhancer binding protein beta [Source:HGNC Symbol;Acc:HGNC:1834]
ENSG00000172318	B3GALT1	7.00427	-2.48416	0.699563	-3.55101	0.00038375	0.00763285	Sig. genes
ENSG00000172331	BPGM	82.9647	0.39571	0.138861	2.84969	0.00437619	0.0483215	Sig. genes		bisphosphoglycerate mutase [Source:HGNC Symbol;Acc:HGNC:1093]
ENSG00000172375	C2CD2L	142.304	-0.477308	0.120648	-3.95621	7.61477e-05	0.00215111	Sig. genes		C2CD2 like [Source:HGNC Symbol;Acc:HGNC:29000]
ENSG00000172432	GTPBP2	36.4793	0.688322	0.227771	3.02199	0.0025112	0.0323333	Sig. genes		GTP binding protein 2 [Source:HGNC Symbol;Acc:HGNC:4670]
ENSG00000172458	IL17D	54.7327	1.66113	0.289466	5.73858	9.54715e-09	8.63583e-07	Sig. genes		interleukin 17D [Source:HGNC Symbol;Acc:HGNC:5984]
ENSG00000172548	NIPAL4	14.4736	1.68084	0.455917	3.68673	0.000227157	0.00511569	Sig. genes		NIPA like domain containing 4 [Source:HGNC Symbol;Acc:HGNC:28018]
ENSG00000172638	EFEMP2	282.275	0.45395	0.117862	3.85155	0.000117371	0.00303543	Sig. genes		EGF containing fibulin extracellular matrix protein 2 [Source:HGNC Symbol;Acc:HGNC:3219]
ENSG00000172809	RPL38	4724.43	0.197303	0.0679497	2.90367	0.00368822	0.0425893	Sig. genes		ribosomal protein L38 [Source:HGNC Symbol;Acc:HGNC:10349]
ENSG00000172955	ADH6	18.6386	1.68008	0.521861	3.21939	0.00128463	0.0193672	Sig. genes		alcohol dehydrogenase 6 (class V) [Source:HGNC Symbol;Acc:HGNC:255]
ENSG00000172965	MIR4435-2HG	1515.01	0.412858	0.109315	3.77677	0.000158876	0.00386613	Sig. genes		MIR4435-2 host gene [Source:HGNC Symbol;Acc:HGNC:35163]
ENSG00000172985	SH3RF3	28.9445	1.28327	0.333817	3.84424	0.000120924	0.00309836	Sig. genes		SH3 domain containing ring finger 3 [Source:HGNC Symbol;Acc:HGNC:24699]
ENSG00000173209	AHSA2P	193.894	-0.448818	0.110598	-4.05809	4.94756e-05	0.00152404	Sig. genes		activator of HSP90 ATPase homolog 2, pseudogene [Source:HGNC Symbol;Acc:HGNC:20437]
ENSG00000173227	SYT12	10.6295	-1.6284	0.489245	-3.32839	0.000873504	0.0143708	Sig. genes		synaptotagmin 12 [Source:HGNC Symbol;Acc:HGNC:18381]
ENSG00000173320	STOX2	122.981	-1.22253	0.288603	-4.23604	2.275e-05	0.000768779	Sig. genes		storkhead box 2 [Source:HGNC Symbol;Acc:HGNC:25450]
ENSG00000173376	NDNF	743.59	-0.407244	0.13742	-2.96349	0.00304171	0.0370227	Sig. genes		neuron derived neurotrophic factor [Source:HGNC Symbol;Acc:HGNC:26256]
ENSG00000173406	DAB1	78.3549	1.69954	0.577989	2.94043	0.00327753	0.038952	Sig. genes		DAB adaptor protein 1 [Source:HGNC Symbol;Acc:HGNC:2661]
ENSG00000173530	TNFRSF10D	233.584	0.404863	0.102952	3.93255	8.40497e-05	0.00230609	Sig. genes		TNF receptor superfamily member 10d [Source:HGNC Symbol;Acc:HGNC:11907]
ENSG00000173812	EIF1	2252.13	0.249696	0.0685757	3.64117	0.000271397	0.00583521	Sig. genes		eukaryotic translation initiation factor 1 [Source:HGNC Symbol;Acc:HGNC:3249]
ENSG00000173926	MARCHF3	320.224	-0.758871	0.155716	-4.87342	1.09682e-06	5.60171e-05	Sig. genes		membrane associated ring-CH-type finger 3 [Source:HGNC Symbol;Acc:HGNC:28728]
ENSG00000173928	SWSAP1	31.5823	-0.726232	0.195596	-3.71293	0.000204874	0.00472848	Sig. genes		SWIM-type zinc finger 7 associated protein 1 [Source:HGNC Symbol;Acc:HGNC:26638]
ENSG00000173947	PIFO	128.136	-0.640309	0.178568	-3.5858	0.000336044	0.00688621	Sig. genes		primary cilia formation [Source:HGNC Symbol;Acc:HGNC:27009]
ENSG00000174007	CEP19	65.6151	-0.625065	0.160615	-3.89169	9.95472e-05	0.00264917	Sig. genes		centrosomal protein 19 [Source:HGNC Symbol;Acc:HGNC:28209]
ENSG00000174136	RGMB	93.6769	0.500645	0.167201	2.99427	0.00275101	0.0345516	Sig. genes		repulsive guidance molecule BMP co-receptor b [Source:HGNC Symbol;Acc:HGNC:26896]
ENSG00000174171	RP11-23P13.6	9.82982	-1.66565	0.509606	-3.26851	0.00108117	0.0169116	Sig. genes
ENSG00000174444	RPL4	2782.8	0.27964	0.0742987	3.76373	0.000167397	0.00399745	Sig. genes		ribosomal protein L4 [Source:HGNC Symbol;Acc:HGNC:10353]
ENSG00000174607	UGT8	8.05674	1.65763	0.525907	3.15195	0.00162184	0.0232785	Sig. genes		UDP glycosyltransferase 8 [Source:HGNC Symbol;Acc:HGNC:12555]
ENSG00000174720	LARP7	723.395	-0.379184	0.0790662	-4.79578	1.62043e-06	7.84377e-05	Sig. genes
ENSG00000174748	RPL15	3755.82	0.16076	0.0451359	3.56169	0.000368476	0.00738751	Sig. genes		ribosomal protein L15 [Source:HGNC Symbol;Acc:HGNC:10306]
ENSG00000174792	ODAPH	63.8807	3.19814	0.541632	5.90463	3.53445e-09	3.55629e-07	Sig. genes		odontogenesis associated phosphoprotein [Source:HGNC Symbol;Acc:HGNC:26300]
ENSG00000174807	CD248	177.824	-0.496267	0.126262	-3.93045	8.47867e-05	0.00232191	Sig. genes		CD248 molecule [Source:HGNC Symbol;Acc:HGNC:18219]
ENSG00000174938	SEZ6L2	120.05	0.456543	0.136358	3.34811	0.000813648	0.0136064	Sig. genes		seizure related 6 homolog like 2 [Source:HGNC Symbol;Acc:HGNC:30844]
ENSG00000175048	ZDHHC14	906.156	-0.553128	0.123516	-4.47819	7.5279e-06	0.000298285	Sig. genes		zinc finger DHHC-type palmitoyltransferase 14 [Source:HGNC Symbol;Acc:HGNC:20341]
ENSG00000175061	SNHG29	3154.19	0.404049	0.0609039	6.63421	3.26247e-11	5.17087e-09	Sig. genes
ENSG00000175175	PPM1E	63.6853	0.628153	0.219353	2.86366	0.00418773	0.0467381	Sig. genes		protein phosphatase, Mg2+/Mn2+ dependent 1E [Source:HGNC Symbol;Acc:HGNC:19322]
ENSG00000175183	CSRP2	102.104	0.70597	0.247264	2.85513	0.00430198	0.0477376	Sig. genes		cysteine and glycine rich protein 2 [Source:HGNC Symbol;Acc:HGNC:2470]
ENSG00000175197	DDIT3	427.029	0.409449	0.137123	2.98599	0.00282661	0.0350414	Sig. genes		DNA damage inducible transcript 3 [Source:HGNC Symbol;Acc:HGNC:2726]
ENSG00000175264	CHST1	259.578	-0.866617	0.187747	-4.61587	3.9145e-06	0.000164962	Sig. genes		carbohydrate sulfotransferase 1 [Source:HGNC Symbol;Acc:HGNC:1969]
ENSG00000175575	PAAF1	94.2334	-0.372347	0.130769	-2.84737	0.00440815	0.0486145	Sig. genes		proteasomal ATPase associated factor 1 [Source:HGNC Symbol;Acc:HGNC:25687]
ENSG00000175592	FOSL1	83.0549	0.616726	0.20452	3.01548	0.00256571	0.0327759	Sig. genes		FOS like 1, AP-1 transcription factor subunit [Source:HGNC Symbol;Acc:HGNC:13718]
ENSG00000175600	SUGCT	25.3818	1.22665	0.346732	3.53776	0.000403533	0.00790731	Sig. genes		succinyl-CoA:glutarate-CoA transferase [Source:HGNC Symbol;Acc:HGNC:16001]
ENSG00000175727	MLXIP	341.164	0.381757	0.110473	3.45565	0.000548963	0.00994127	Sig. genes		MLX interacting protein [Source:HGNC Symbol;Acc:HGNC:17055]
ENSG00000175906	ARL4D	139.169	0.762618	0.257369	2.96313	0.00304529	0.0370272	Sig. genes		ADP ribosylation factor like GTPase 4D [Source:HGNC Symbol;Acc:HGNC:656]
ENSG00000175920	DOK7	20.2492	1.00578	0.347498	2.89436	0.00379936	0.0435917	Sig. genes		docking protein 7 [Source:HGNC Symbol;Acc:HGNC:26594]
ENSG00000175928	LRRN1	129.404	-0.734178	0.213778	-3.4343	0.000594076	0.0106293	Sig. genes		leucine rich repeat neuronal 1 [Source:HGNC Symbol;Acc:HGNC:20980]
ENSG00000176014	TUBB6	612.701	0.602921	0.200224	3.01123	0.0026019	0.0330966	Sig. genes		tubulin beta 6 class V [Source:HGNC Symbol;Acc:HGNC:20776]
ENSG00000176102	CSTF3	106.159	-0.431497	0.14493	-2.97727	0.00290824	0.0357247	Sig. genes		cleavage stimulation factor subunit 3 [Source:HGNC Symbol;Acc:HGNC:2485]
ENSG00000176170	SPHK1	71.9734	1.04292	0.238222	4.37793	1.19812e-05	0.000448917	Sig. genes		sphingosine kinase 1 [Source:HGNC Symbol;Acc:HGNC:11240]
ENSG00000176244	ACBD7	55.0895	-1.24998	0.183044	-6.82889	8.55748e-12	1.56392e-09	Sig. genes		acyl-CoA binding domain containing 7 [Source:HGNC Symbol;Acc:HGNC:17715]
ENSG00000176340	COX8A	970.341	-0.203036	0.0674022	-3.0123	0.00259277	0.0330509	Sig. genes		cytochrome c oxidase subunit 8A [Source:HGNC Symbol;Acc:HGNC:2294]
ENSG00000176532	PRR15	49.2767	2.33825	0.336085	6.9573	3.46849e-12	6.67964e-10	Sig. genes		proline rich 15 [Source:HGNC Symbol;Acc:HGNC:22310]
ENSG00000176658	MYO1D	225.907	0.411658	0.12611	3.26429	0.00109739	0.0171008	Sig. genes		myosin ID [Source:HGNC Symbol;Acc:HGNC:7598]
ENSG00000176887	SOX11	129.247	1.01791	0.174805	5.82311	5.77608e-09	5.56181e-07	Sig. genes		SRY-box transcription factor 11 [Source:HGNC Symbol;Acc:HGNC:11191]
ENSG00000176915	ANKLE2	315.287	0.451082	0.11417	3.95098	7.78321e-05	0.00218491	Sig. genes		ankyrin repeat and LEM domain containing 2 [Source:HGNC Symbol;Acc:HGNC:29101]
ENSG00000176945	MUC20	125.325	-0.408734	0.12291	-3.32546	0.000882717	0.0144775	Sig. genes
ENSG00000177042	TMEM80	43.3288	-0.600601	0.189899	-3.16275	0.00156289	0.0226834	Sig. genes		transmembrane protein 80 [Source:HGNC Symbol;Acc:HGNC:27453]
ENSG00000177156	TALDO1	490.844	0.373984	0.0989947	3.77782	0.000158209	0.00385513	Sig. genes		transaldolase 1 [Source:HGNC Symbol;Acc:HGNC:11559]
ENSG00000177283	FZD8	25.5937	0.9985	0.258939	3.85612	0.000115202	0.00299459	Sig. genes		frizzled class receptor 8 [Source:HGNC Symbol;Acc:HGNC:4046]
ENSG00000177410	ZFAS1	1513.63	0.482589	0.1019	4.73591	2.18069e-06	0.000100144	Sig. genes		ZNFX1 antisense RNA 1 [Source:HGNC Symbol;Acc:HGNC:33101]
ENSG00000177425	PAWR	1348.82	0.531995	0.116872	4.55194	5.31531e-06	0.000218342	Sig. genes		pro-apoptotic WT1 regulator [Source:HGNC Symbol;Acc:HGNC:8614]
ENSG00000177548	RABEP2	70.7204	-0.486121	0.166253	-2.92399	0.00345577	0.0405589	Sig. genes		rabaptin, RAB GTPase binding effector protein 2 [Source:HGNC Symbol;Acc:HGNC:24817]
ENSG00000177600	RPLP2	8734.94	0.179496	0.0574227	3.12587	0.0017728	0.0250309	Sig. genes		ribosomal protein lateral stalk subunit P2 [Source:HGNC Symbol;Acc:HGNC:10377]
ENSG00000177614	PGBD5	22.0056	1.08977	0.303738	3.58785	0.000333419	0.00684025	Sig. genes		piggyBac transposable element derived 5 [Source:HGNC Symbol;Acc:HGNC:19405]
ENSG00000177697	CD151	952.999	0.433738	0.084807	5.11442	3.14705e-07	1.87879e-05	Sig. genes		CD151 molecule (Raph blood group) [Source:HGNC Symbol;Acc:HGNC:1630]
ENSG00000177700	POLR2L	1356.38	-0.335238	0.0783523	-4.2786	1.88072e-05	0.000661752	Sig. genes		RNA polymerase II, I and III subunit L [Source:HGNC Symbol;Acc:HGNC:9199]
ENSG00000177791	MYOZ1	24.1463	1.50313	0.334055	4.49965	6.80645e-06	0.000272106	Sig. genes		myozenin 1 [Source:HGNC Symbol;Acc:HGNC:13752]
ENSG00000177954	RPS27	7228.93	0.360573	0.0630831	5.71584	1.09162e-08	9.67868e-07	Sig. genes		ribosomal protein S27 [Source:HGNC Symbol;Acc:HGNC:10416]
ENSG00000177981	ASB8	222.933	-0.260136	0.0866641	-3.00166	0.00268509	0.0339618	Sig. genes		ankyrin repeat and SOCS box containing 8 [Source:HGNC Symbol;Acc:HGNC:17183]
ENSG00000178057	NDUFAF3	246.873	-0.248126	0.0848114	-2.92562	0.00343771	0.040479	Sig. genes		NADH:ubiquinone oxidoreductase complex assembly factor 3 [Source:HGNC Symbol;Acc:HGNC:29918]
ENSG00000178127	NDUFV2	240.944	-0.307879	0.0833702	-3.69291	0.000221702	0.0050135	Sig. genes		NADH:ubiquinone oxidoreductase core subunit V2 [Source:HGNC Symbol;Acc:HGNC:7717]
ENSG00000178307	TMEM11	138.774	-0.399855	0.131774	-3.03439	0.00241021	0.0314169	Sig. genes		transmembrane protein 11 [Source:HGNC Symbol;Acc:HGNC:16823]
ENSG00000178573	MAF	377.038	0.623679	0.149139	4.18185	2.89148e-05	0.000955469	Sig. genes		MAF bZIP transcription factor [Source:HGNC Symbol;Acc:HGNC:6776]
ENSG00000178607	ERN1	118.814	0.425376	0.143544	2.96338	0.00304285	0.0370227	Sig. genes		endoplasmic reticulum to nucleus signaling 1 [Source:HGNC Symbol;Acc:HGNC:3449]
ENSG00000178662	CSRNP3	50.1132	-1.14439	0.387917	-2.9501	0.00317673	0.0380316	Sig. genes		cysteine and serine rich nuclear protein 3 [Source:HGNC Symbol;Acc:HGNC:30729]
ENSG00000178726	THBD	560.361	0.532175	0.143593	3.70613	0.000210454	0.00481384	Sig. genes		thrombomodulin [Source:HGNC Symbol;Acc:HGNC:11784]
ENSG00000178776	C5orf46	46.6398	3.85527	0.337767	11.414	3.55951e-30	7.08342e-27	Sig. genes		chromosome 5 open reading frame 46 [Source:HGNC Symbol;Acc:HGNC:33768]
ENSG00000178860	MSC	15.2868	1.2843	0.368208	3.48796	0.000486713	0.00912778	Sig. genes		musculin [Source:HGNC Symbol;Acc:HGNC:7321]
ENSG00000178878	APOLD1	34.9066	-1.43982	0.41016	-3.51039	0.000447442	0.00859838	Sig. genes		apolipoprotein L domain containing 1 [Source:HGNC Symbol;Acc:HGNC:25268]
ENSG00000178988	MRFAP1L1	762.032	-0.283973	0.0666037	-4.26362	2.0114e-05	0.000704026	Sig. genes		Morf4 family associated protein 1 like 1 [Source:HGNC Symbol;Acc:HGNC:28796]
ENSG00000179085	DPM3	317.521	-0.248161	0.0810064	-3.06347	0.00218787	0.029177	Sig. genes		dolichyl-phosphate mannosyltransferase subunit 3, regulatory [Source:HGNC Symbol;Acc:HGNC:3007]
ENSG00000179152	TCAIM	96.0399	-0.554817	0.190837	-2.90729	0.00364578	0.042208	Sig. genes		T cell activation inhibitor, mitochondrial [Source:HGNC Symbol;Acc:HGNC:25241]
ENSG00000179256	SMCO3	66.8329	0.882356	0.296524	2.97567	0.00292353	0.0358879	Sig. genes		single-pass membrane protein with coiled-coil domains 3 [Source:HGNC Symbol;Acc:HGNC:34401]
ENSG00000179284	DAND5	6.01408	-2.43633	0.559996	-4.35061	1.35757e-05	0.000494187	Sig. genes		DAN domain BMP antagonist family member 5 [Source:HGNC Symbol;Acc:HGNC:26780]
ENSG00000179364	PACS2	151.126	0.352738	0.111913	3.15191	0.00162209	0.0232785	Sig. genes
ENSG00000179431	FJX1	121.459	-0.477428	0.14814	-3.22281	0.00126939	0.0192017	Sig. genes		four-jointed box kinase 1 [Source:HGNC Symbol;Acc:HGNC:17166]
ENSG00000179546	HTR1D	15.1949	1.72743	0.359396	4.80649	1.53606e-06	7.45552e-05	Sig. genes		5-hydroxytryptamine receptor 1D [Source:HGNC Symbol;Acc:HGNC:5289]
ENSG00000179673	RPRML	130.336	-2.04678	0.310736	-6.58689	4.49139e-11	6.81702e-09	Sig. genes		reprimo like [Source:HGNC Symbol;Acc:HGNC:32422]
ENSG00000179820	MYADM	331.24	0.482073	0.131405	3.66859	0.000243891	0.00541946	Sig. genes		myeloid associated differentiation marker [Source:HGNC Symbol;Acc:HGNC:7544]
ENSG00000180155	LYNX1	241.608	-0.355453	0.104656	-3.39641	0.00068277	0.0118378	Sig. genes		Ly6/neurotoxin 1 [Source:HGNC Symbol;Acc:HGNC:29604]
ENSG00000180198	RCC1	98.5048	0.697169	0.209188	3.33274	0.000859956	0.0142346	Sig. genes		regulator of chromosome condensation 1 [Source:HGNC Symbol;Acc:HGNC:1913]
ENSG00000180376	CCDC66	219.8	-0.518899	0.173461	-2.99145	0.00277658	0.0347509	Sig. genes		coiled-coil domain containing 66 [Source:HGNC Symbol;Acc:HGNC:27709]
ENSG00000180425	C11orf71	71.3223	-0.636832	0.181807	-3.50279	0.000460412	0.00880041	Sig. genes		chromosome 11 open reading frame 71 [Source:HGNC Symbol;Acc:HGNC:25937]
ENSG00000180447	GAS1	211.316	-0.706932	0.197993	-3.57049	0.000356311	0.00720263	Sig. genes		growth arrest specific 1 [Source:HGNC Symbol;Acc:HGNC:4165]
ENSG00000180739	S1PR5	23.8975	3.89123	0.60396	6.44286	1.17244e-10	1.67988e-08	Sig. genes
ENSG00000181085	MAPK15	4.03642	-2.2324	0.645562	-3.45807	0.00054406	0.00987246	Sig. genes		mitogen-activated protein kinase 15 [Source:HGNC Symbol;Acc:HGNC:24667]
ENSG00000181192	DHTKD1	114.808	-0.291574	0.0977839	-2.98182	0.00286544	0.0353444	Sig. genes		dehydrogenase E1 and transketolase domain containing 1 [Source:HGNC Symbol;Acc:HGNC:23537]
ENSG00000181220	ZNF746	75.1235	0.588742	0.160787	3.66164	0.000250607	0.00550046	Sig. genes
ENSG00000181322	NME9	30.7026	-1.34655	0.348817	-3.86034	0.00011323	0.00294759	Sig. genes		NME/NM23 family member 9 [Source:HGNC Symbol;Acc:HGNC:21343]
ENSG00000181444	ZNF467	12.1007	-1.33608	0.464578	-2.87589	0.00402887	0.0452963	Sig. genes		zinc finger protein 467 [Source:HGNC Symbol;Acc:HGNC:23154]
ENSG00000181458	TMEM45A	303.853	1.14544	0.172332	6.6467	2.99747e-11	4.79327e-09	Sig. genes		transmembrane protein 45A [Source:HGNC Symbol;Acc:HGNC:25480]
ENSG00000181513	ACBD4	41.2366	-0.491433	0.153076	-3.21039	0.00132557	0.0198503	Sig. genes		acyl-CoA binding domain containing 4 [Source:HGNC Symbol;Acc:HGNC:23337]
ENSG00000181652	ATG9B	17.2246	-1.27067	0.425034	-2.98957	0.00279369	0.0349162	Sig. genes
ENSG00000182022	CHST15	306.446	0.361408	0.0919039	3.93246	8.40803e-05	0.00230609	Sig. genes		carbohydrate sulfotransferase 15 [Source:HGNC Symbol;Acc:HGNC:18137]
ENSG00000182103	FAM181B	355.331	-0.613897	0.180213	-3.4065	0.000658017	0.0114864	Sig. genes		family with sequence similarity 181 member B [Source:HGNC Symbol;Acc:HGNC:28512]
ENSG00000182117	NOP10	313.136	0.249173	0.086157	2.89208	0.00382704	0.0437691	Sig. genes		NOP10 ribonucleoprotein [Source:HGNC Symbol;Acc:HGNC:14378]
ENSG00000182158	CREB3L2	560.582	0.519015	0.0894442	5.80267	6.52683e-09	6.18494e-07	Sig. genes
ENSG00000182197	EXT1	294.153	0.78053	0.107662	7.24981	4.17349e-13	9.42963e-11	Sig. genes		exostosin glycosyltransferase 1 [Source:HGNC Symbol;Acc:HGNC:3512]
ENSG00000182199	SHMT2	385.294	0.455512	0.104542	4.35721	1.31733e-05	0.000481497	Sig. genes		serine hydroxymethyltransferase 2 [Source:HGNC Symbol;Acc:HGNC:10852]
ENSG00000182379	NXPH4	69.9961	-0.669533	0.181216	-3.69467	0.000220176	0.00499159	Sig. genes		neurexophilin 4 [Source:HGNC Symbol;Acc:HGNC:8078]
ENSG00000182389	CACNB4	169.892	-0.640144	0.212472	-3.01284	0.00258813	0.0330153	Sig. genes		calcium voltage-gated channel auxiliary subunit beta 4 [Source:HGNC Symbol;Acc:HGNC:1404]
ENSG00000182446	NPLOC4	549.291	0.715181	0.122206	5.85226	4.84934e-09	4.74599e-07	Sig. genes		NPL4 homolog, ubiquitin recognition factor [Source:HGNC Symbol;Acc:HGNC:18261]
ENSG00000182492	BGN	1956.74	1.38041	0.140414	9.83095	8.28317e-23	7.06436e-20	Sig. genes		biglycan [Source:HGNC Symbol;Acc:HGNC:1044]
ENSG00000182512	GLRX5	377.738	-0.365294	0.0640834	-5.70029	1.19602e-08	1.04491e-06	Sig. genes		glutaredoxin 5 [Source:HGNC Symbol;Acc:HGNC:20134]
ENSG00000182578	CSF1R	20.2313	1.3835	0.357354	3.87151	0.000108165	0.0028241	Sig. genes		colony stimulating factor 1 receptor [Source:HGNC Symbol;Acc:HGNC:2433]
ENSG00000182667	NTM	45.6677	2.17615	0.351173	6.19682	5.76169e-10	7.21621e-08	Sig. genes		neurotrimin [Source:HGNC Symbol;Acc:HGNC:17941]
ENSG00000182752	PAPPA	4579.16	-0.612821	0.112837	-5.43102	5.60322e-08	4.15806e-06	Sig. genes		pappalysin 1 [Source:HGNC Symbol;Acc:HGNC:8602]
ENSG00000182774	RPS17	5919.08	0.238935	0.0589453	4.05351	5.04549e-05	0.00154734	Sig. genes		ribosomal protein S17 [Source:HGNC Symbol;Acc:HGNC:10397]
ENSG00000182809	CRIP2	395.854	-0.673743	0.103763	-6.4931	8.40888e-11	1.24465e-08	Sig. genes		cysteine rich protein 2 [Source:HGNC Symbol;Acc:HGNC:2361]
ENSG00000182827	ACBD3	575.244	0.227886	0.063217	3.60482	0.000312367	0.00648261	Sig. genes		acyl-CoA binding domain containing 3 [Source:HGNC Symbol;Acc:HGNC:15453]
ENSG00000182901	RGS7	19.2794	0.914363	0.302974	3.01796	0.00254486	0.0326026	Sig. genes
ENSG00000183011	NAA38	424.188	-0.34065	0.105894	-3.21689	0.00129589	0.0195036	Sig. genes		N-alpha-acetyltransferase 38, NatC auxiliary subunit [Source:HGNC Symbol;Acc:HGNC:28212]
ENSG00000183049	CAMK1D	180.595	-0.612138	0.185291	-3.30367	0.000954286	0.0153147	Sig. genes
ENSG00000183087	GAS6	370.926	1.05674	0.162985	6.48365	8.95306e-11	1.31434e-08	Sig. genes		growth arrest specific 6 [Source:HGNC Symbol;Acc:HGNC:4168]
ENSG00000183255	PTTG1IP	1861.51	0.394565	0.0711176	5.54807	2.88848e-08	2.31985e-06	Sig. genes		PTTG1 interacting protein [Source:HGNC Symbol;Acc:HGNC:13524]
ENSG00000183386	FHL3	107.026	0.733938	0.158185	4.63975	3.48827e-06	0.000149105	Sig. genes		four and a half LIM domains 3 [Source:HGNC Symbol;Acc:HGNC:3704]
ENSG00000183615	FAM167B	30.6389	-0.793003	0.223223	-3.55251	0.000381578	0.00760184	Sig. genes		family with sequence similarity 167 member B [Source:HGNC Symbol;Acc:HGNC:28133]
ENSG00000183625	CCR3	4.66958	2.38229	0.814611	2.92446	0.00345058	0.0405589	Sig. genes		C-C motif chemokine receptor 3 [Source:HGNC Symbol;Acc:HGNC:1604]
ENSG00000183648	NDUFB1	796.431	-0.430958	0.089608	-4.80937	1.5141e-06	7.38897e-05	Sig. genes		NADH:ubiquinone oxidoreductase subunit B1 [Source:HGNC Symbol;Acc:HGNC:7695]
ENSG00000183688	RFLNB	1278.88	0.278535	0.074087	3.75957	0.000170206	0.00405911	Sig. genes		refilin B [Source:HGNC Symbol;Acc:HGNC:28705]
ENSG00000183690	EFHC2	23.4042	-1.97106	0.3794	-5.19519	2.04509e-07	1.31281e-05	Sig. genes		EF-hand domain containing 2 [Source:HGNC Symbol;Acc:HGNC:26233]
ENSG00000183696	UPP1	343.004	0.577796	0.168017	3.43892	0.000584035	0.0105021	Sig. genes		uridine phosphorylase 1 [Source:HGNC Symbol;Acc:HGNC:12576]
ENSG00000183773	AIFM3	19.9315	-0.897863	0.311038	-2.88667	0.00389346	0.0443024	Sig. genes		apoptosis inducing factor mitochondria associated 3 [Source:HGNC Symbol;Acc:HGNC:26398]
ENSG00000183775	KCTD16	9.78542	1.66571	0.566959	2.93798	0.00330357	0.0391591	Sig. genes		potassium channel tetramerization domain containing 16 [Source:HGNC Symbol;Acc:HGNC:29244]
ENSG00000183780	SLC35F3	83.5605	-0.698508	0.203988	-3.42427	0.00061646	0.0109423	Sig. genes		solute carrier family 35 member F3 [Source:HGNC Symbol;Acc:HGNC:23616]
ENSG00000183801	OLFML1	119.661	-1.21039	0.172592	-7.013	2.33254e-12	4.59075e-10	Sig. genes		olfactomedin like 1 [Source:HGNC Symbol;Acc:HGNC:24473]
ENSG00000183963	SMTN	32.9142	1.02103	0.283525	3.6012	0.000316755	0.0065509	Sig. genes		smoothelin [Source:HGNC Symbol;Acc:HGNC:11126]
ENSG00000184009	ACTG1	6761.49	0.406522	0.104592	3.88673	0.000101605	0.00267609	Sig. genes		actin gamma 1 [Source:HGNC Symbol;Acc:HGNC:144]
ENSG00000184014	DENND5A	124.102	0.378726	0.132714	2.8537	0.00432129	0.047911	Sig. genes		DENN domain containing 5A [Source:HGNC Symbol;Acc:HGNC:19344]
ENSG00000184209	SNRNP35	95.4004	-0.423117	0.149099	-2.83782	0.00454223	0.0495742	Sig. genes		small nuclear ribonucleoprotein U11/U12 subunit 35 [Source:HGNC Symbol;Acc:HGNC:30852]
ENSG00000184216	IRAK1	970.407	0.825411	0.0993886	8.30489	9.99111e-17	4.16141e-14	Sig. genes		interleukin 1 receptor associated kinase 1 [Source:HGNC Symbol;Acc:HGNC:6112]
ENSG00000184226	PCDH9	103.567	0.888243	0.302452	2.93681	0.00331605	0.0392794	Sig. genes		protocadherin 9 [Source:HGNC Symbol;Acc:HGNC:8661]
ENSG00000184445	KNTC1	24.4477	-0.91722	0.296249	-3.09611	0.00196079	0.0268689	Sig. genes		kinetochore associated 1 [Source:HGNC Symbol;Acc:HGNC:17255]
ENSG00000184515	BEX5	266.667	0.378044	0.129417	2.92113	0.00348768	0.0408531	Sig. genes		brain expressed X-linked 5 [Source:HGNC Symbol;Acc:HGNC:27990]
ENSG00000184524	CEND1	42.6988	-1.1297	0.362927	-3.11275	0.00185355	0.0258142	Sig. genes		cell cycle exit and neuronal differentiation 1 [Source:HGNC Symbol;Acc:HGNC:24153]
ENSG00000184588	PDE4B	55.6596	-0.751567	0.246449	-3.04959	0.00229157	0.0302446	Sig. genes		phosphodiesterase 4B [Source:HGNC Symbol;Acc:HGNC:8781]
ENSG00000184828	ZBTB7C	209.82	-0.907765	0.142382	-6.37557	1.8228e-10	2.57057e-08	Sig. genes		zinc finger and BTB domain containing 7C [Source:HGNC Symbol;Acc:HGNC:31700]
ENSG00000184840	TMED9	1329.56	0.288571	0.0620695	4.64915	3.33301e-06	0.000143496	Sig. genes		transmembrane p24 trafficking protein 9 [Source:HGNC Symbol;Acc:HGNC:24878]
ENSG00000184925	LCN12	12.6315	-2.54293	0.439537	-5.78547	7.23108e-09	6.74524e-07	Sig. genes		lipocalin 12 [Source:HGNC Symbol;Acc:HGNC:28733]
ENSG00000185070	FLRT2	440.675	2.42483	0.235523	10.2955	7.38101e-25	9.44242e-22	Sig. genes		fibronectin leucine rich transmembrane protein 2 [Source:HGNC Symbol;Acc:HGNC:3761]
ENSG00000185101	ANO9	21.7717	-1.05149	0.334395	-3.14447	0.00166388	0.023802	Sig. genes		anoctamin 9 [Source:HGNC Symbol;Acc:HGNC:20679]
ENSG00000185112	FAM43A	259.477	0.520952	0.145421	3.58238	0.000340484	0.0069454	Sig. genes		family with sequence similarity 43 member A [Source:HGNC Symbol;Acc:HGNC:26888]
ENSG00000185189	NRBP2	76.0576	0.469738	0.123935	3.79019	0.000150531	0.00370014	Sig. genes		nuclear receptor binding protein 2 [Source:HGNC Symbol;Acc:HGNC:19339]
ENSG00000185201	IFITM2	2317.03	-0.618887	0.0923281	-6.70312	2.0401e-11	3.36506e-09	Sig. genes
ENSG00000185352	HS6ST3	11.6423	-1.64088	0.445851	-3.68034	0.00023292	0.00522101	Sig. genes		heparan sulfate 6-O-sulfotransferase 3 [Source:HGNC Symbol;Acc:HGNC:19134]
ENSG00000185432	METTL7A	174.572	-0.629441	0.155952	-4.03612	5.43413e-05	0.00164124	Sig. genes		methyltransferase like 7A [Source:HGNC Symbol;Acc:HGNC:24550]
ENSG00000185479	KRT6B	15.1034	1.66737	0.578801	2.88073	0.00396756	0.0448321	Sig. genes		keratin 6B [Source:HGNC Symbol;Acc:HGNC:6444]
ENSG00000185608	MRPL40	330.895	-0.426501	0.0761998	-5.59714	2.17911e-08	1.79027e-06	Sig. genes		mitochondrial ribosomal protein L40 [Source:HGNC Symbol;Acc:HGNC:14491]
ENSG00000185630	PBX1	1311.43	-0.251792	0.0809795	-3.10933	0.00187512	0.0260337	Sig. genes		PBX homeobox 1 [Source:HGNC Symbol;Acc:HGNC:8632]
ENSG00000185650	ZFP36L1	1925.27	0.639411	0.121854	5.24736	1.54295e-07	1.02349e-05	Sig. genes		ZFP36 ring finger protein like 1 [Source:HGNC Symbol;Acc:HGNC:1107]
ENSG00000185722	ANKFY1	200.839	-0.695593	0.170328	-4.08385	4.42954e-05	0.00140164	Sig. genes		ankyrin repeat and FYVE domain containing 1 [Source:HGNC Symbol;Acc:HGNC:20763]
ENSG00000185728	YTHDF3	357.955	0.245945	0.0780948	3.14931	0.00163654	0.0234671	Sig. genes		YTH N6-methyladenosine RNA binding protein 3 [Source:HGNC Symbol;Acc:HGNC:26465]
ENSG00000185745	IFIT1	103.471	-0.494312	0.146323	-3.37822	0.000729578	0.012528	Sig. genes		interferon induced protein with tetratricopeptide repeats 1 [Source:HGNC Symbol;Acc:HGNC:5407]
ENSG00000185774	KCNIP4	4.1252	3.14517	0.772819	4.06974	4.70659e-05	0.00146346	Sig. genes		potassium voltage-gated channel interacting protein 4 [Source:HGNC Symbol;Acc:HGNC:30083]
ENSG00000185813	PCYT2	62.0747	-0.420311	0.135475	-3.1025	0.00191893	0.0264777	Sig. genes		phosphate cytidylyltransferase 2, ethanolamine [Source:HGNC Symbol;Acc:HGNC:8756]
ENSG00000185847	LINC01405	4.61146	2.98698	0.932335	3.20377	0.00135643	0.020211	Sig. genes
ENSG00000185896	LAMP1	1497.78	0.223845	0.071815	3.11697	0.00182723	0.0255271	Sig. genes		lysosomal associated membrane protein 1 [Source:HGNC Symbol;Acc:HGNC:6499]
ENSG00000185920	PTCH1	82.7486	-0.623543	0.204233	-3.0531	0.00226488	0.0300029	Sig. genes
ENSG00000185950	IRS2	718.157	0.867165	0.102369	8.47095	2.4339e-17	1.14714e-14	Sig. genes		insulin receptor substrate 2 [Source:HGNC Symbol;Acc:HGNC:6126]
ENSG00000185988	PLK5	567.332	-2.4501	0.193402	-12.6684	8.85012e-37	5.28352e-33	Sig. genes		polo like kinase 5 (inactive) [Source:HGNC Symbol;Acc:HGNC:27001]
ENSG00000186088	GSAP	47.8265	-0.726067	0.223584	-3.2474	0.00116464	0.0179661	Sig. genes		gamma-secretase activating protein [Source:HGNC Symbol;Acc:HGNC:28042]
ENSG00000186468	RPS23	8427.99	0.18425	0.0569499	3.2353	0.00121515	0.0185348	Sig. genes		ribosomal protein S23 [Source:HGNC Symbol;Acc:HGNC:10410]
ENSG00000186479	RGS7BP	96.6864	-1.26912	0.232039	-5.46941	4.5153e-08	3.45594e-06	Sig. genes		regulator of G protein signaling 7 binding protein [Source:HGNC Symbol;Acc:HGNC:23271]
ENSG00000186522	SEPTIN10	146.251	0.364141	0.126639	2.87543	0.00403474	0.0453339	Sig. genes		septin 10 [Source:HGNC Symbol;Acc:HGNC:14349]
ENSG00000186567	CEACAM19	52.5279	0.650325	0.220174	2.95368	0.00314005	0.0377438	Sig. genes
ENSG00000186594	MIR22HG	371.428	0.43117	0.120318	3.58358	0.000338917	0.00693049	Sig. genes
ENSG00000186665	C17orf58	67.5629	-0.44174	0.139272	-3.17177	0.00151513	0.0220797	Sig. genes		chromosome 17 open reading frame 58 [Source:HGNC Symbol;Acc:HGNC:27568]
ENSG00000186866	POFUT2	124.324	0.491205	0.142883	3.43781	0.000586436	0.0105241	Sig. genes		protein O-fucosyltransferase 2 [Source:HGNC Symbol;Acc:HGNC:14683]
ENSG00000187109	NAP1L1	2308.31	0.3239	0.0803572	4.03075	5.55984e-05	0.00167638	Sig. genes		nucleosome assembly protein 1 like 1 [Source:HGNC Symbol;Acc:HGNC:7637]
ENSG00000187193	MT1X	203.355	0.705904	0.216371	3.26247	0.00110444	0.0171706	Sig. genes		metallothionein 1X [Source:HGNC Symbol;Acc:HGNC:7405]
ENSG00000187240	DYNC2H1	363.534	-0.518953	0.13714	-3.7841	0.000154265	0.00376928	Sig. genes		dynein cytoplasmic 2 heavy chain 1 [Source:HGNC Symbol;Acc:HGNC:2962]
ENSG00000187244	BCAM	83.2771	-0.718333	0.178603	-4.02196	5.77154e-05	0.0017228	Sig. genes		basal cell adhesion molecule (Lutheran blood group) [Source:HGNC Symbol;Acc:HGNC:6722]
ENSG00000187257	RSBN1L	307.44	-0.571645	0.115042	-4.969	6.72977e-07	3.65243e-05	Sig. genes		round spermatid basic protein 1 like [Source:HGNC Symbol;Acc:HGNC:24765]
ENSG00000187323	DCC	89.0518	-2.45415	0.413901	-5.92933	3.04182e-09	3.14907e-07	Sig. genes		DCC netrin 1 receptor [Source:HGNC Symbol;Acc:HGNC:2701]
ENSG00000187498	COL4A1	121.715	1.83437	0.379136	4.83829	1.30962e-06	6.47937e-05	Sig. genes		collagen type IV alpha 1 chain [Source:HGNC Symbol;Acc:HGNC:2202]
ENSG00000187808	SOWAHD	9.65096	-1.76396	0.50979	-3.46017	0.000539829	0.00983554	Sig. genes		sosondowah ankyrin repeat domain family member D [Source:HGNC Symbol;Acc:HGNC:32960]
ENSG00000187840	EIF4EBP1	174.288	0.534959	0.169349	3.15891	0.00158362	0.0229101	Sig. genes		eukaryotic translation initiation factor 4E binding protein 1 [Source:HGNC Symbol;Acc:HGNC:3288]
ENSG00000187954	CYHR1	190.747	-0.31277	0.0982144	-3.18457	0.0014497	0.021364	Sig. genes		cysteine and histidine rich 1 [Source:HGNC Symbol;Acc:HGNC:17806]
ENSG00000187957	DNER	139.344	-0.99111	0.209442	-4.73213	2.22171e-06	0.000101767	Sig. genes		delta/notch like EGF repeat containing [Source:HGNC Symbol;Acc:HGNC:24456]
ENSG00000188064	WNT7B	73.4499	1.06863	0.320935	3.32974	0.000869256	0.014324	Sig. genes		Wnt family member 7B [Source:HGNC Symbol;Acc:HGNC:12787]
ENSG00000188191	PRKAR1B	40.7674	-0.991422	0.31436	-3.15378	0.00161172	0.0231854	Sig. genes		protein kinase cAMP-dependent type I regulatory subunit beta [Source:HGNC Symbol;Acc:HGNC:9390]
ENSG00000188342	GTF2F2	468.97	0.308629	0.0782909	3.94209	8.07756e-05	0.00224991	Sig. genes		general transcription factor IIF subunit 2 [Source:HGNC Symbol;Acc:HGNC:4653]
ENSG00000188404	SELL	8.7978	-1.51318	0.531214	-2.84852	0.00439225	0.048469	Sig. genes		selectin L [Source:HGNC Symbol;Acc:HGNC:10720]
ENSG00000188488	SERPINA5	120.393	-1.77384	0.239142	-7.41753	1.19327e-13	3.01007e-11	Sig. genes		serpin family A member 5 [Source:HGNC Symbol;Acc:HGNC:8723]
ENSG00000188522	FAM83G	127.414	0.786104	0.133915	5.87018	4.35322e-09	4.30753e-07	Sig. genes		family with sequence similarity 83 member G [Source:HGNC Symbol;Acc:HGNC:32554]
ENSG00000188559	RALGAPA2	128.93	-0.644176	0.215846	-2.98442	0.00284112	0.0351655	Sig. genes
ENSG00000188807	TMEM201	67.7539	-0.414407	0.12554	-3.301	0.000963406	0.0153922	Sig. genes		transmembrane protein 201 [Source:HGNC Symbol;Acc:HGNC:33719]
ENSG00000188820	CALHM6	4.85181	1.83546	0.641301	2.86208	0.00420868	0.0469057	Sig. genes		calcium homeostasis modulator family member 6 [Source:HGNC Symbol;Acc:HGNC:33391]
ENSG00000189068	VSTM1	6.5719	2.05597	0.665985	3.08711	0.00202115	0.0274441	Sig. genes		V-set and transmembrane domain containing 1 [Source:HGNC Symbol;Acc:HGNC:29455]
ENSG00000189091	SF3B3	168.162	0.468815	0.153929	3.04566	0.00232169	0.0305298	Sig. genes		splicing factor 3b subunit 3 [Source:HGNC Symbol;Acc:HGNC:10770]
ENSG00000189184	PCDH18	297.496	-0.805038	0.177398	-4.53804	5.67784e-06	0.00023164	Sig. genes		protocadherin 18 [Source:HGNC Symbol;Acc:HGNC:14268]
ENSG00000189292	ALKAL2	44.7071	2.32079	0.388128	5.97945	2.2389e-09	2.43023e-07	Sig. genes		ALK and LTK ligand 2 [Source:HGNC Symbol;Acc:HGNC:27683]
ENSG00000189337	KAZN	491.99	-0.600946	0.0892157	-6.73587	1.62949e-11	2.83342e-09	Sig. genes		kazrin, periplakin interacting protein [Source:HGNC Symbol;Acc:HGNC:29173]
ENSG00000189350	TOGARAM2	6.53794	-2.09205	0.525397	-3.98184	6.83834e-05	0.00196273	Sig. genes		TOG array regulator of axonemal microtubules 2 [Source:HGNC Symbol;Acc:HGNC:33715]
ENSG00000189423	USP32P3	637.772	-0.587191	0.153037	-3.83691	0.000124591	0.00317867	Sig. genes		ubiquitin specific peptidase 32 pseudogene 3 [Source:HGNC Symbol;Acc:HGNC:43576]
ENSG00000196118	CCDC189	37.9392	-0.889699	0.226079	-3.93534	8.30774e-05	0.00229151	Sig. genes		cilia and flagella associated protein 119 [Source:HGNC Symbol;Acc:HGNC:28078]
ENSG00000196154	S100A4	2279.17	-1.07203	0.26765	-4.00532	6.19323e-05	0.0018334	Sig. genes		S100 calcium binding protein A4 [Source:HGNC Symbol;Acc:HGNC:10494]
ENSG00000196196	HRCT1	7.01591	2.35163	0.676562	3.47585	0.000509233	0.00942185	Sig. genes		histidine rich carboxyl terminus 1 [Source:HGNC Symbol;Acc:HGNC:33872]
ENSG00000196220	SRGAP3	93.0046	-0.917731	0.252545	-3.63393	0.000279133	0.00597284	Sig. genes
ENSG00000196262	PPIA	3141.2	-0.241675	0.0661982	-3.65078	0.000261445	0.00568262	Sig. genes		peptidylprolyl isomerase A [Source:HGNC Symbol;Acc:HGNC:9253]
ENSG00000196290	NIF3L1	46.0126	0.440223	0.152857	2.87996	0.00397724	0.0448849	Sig. genes
ENSG00000196305	IARS1	621.506	0.418907	0.102664	4.08037	4.49644e-05	0.00141531	Sig. genes		isoleucyl-tRNA synthetase 1 [Source:HGNC Symbol;Acc:HGNC:5330]
ENSG00000196335	STK31	30.6899	-1.00999	0.33017	-3.05899	0.00222081	0.0295077	Sig. genes		serine/threonine kinase 31 [Source:HGNC Symbol;Acc:HGNC:11407]
ENSG00000196345	ZKSCAN7	11.9313	1.07583	0.377161	2.85244	0.00433848	0.0480236	Sig. genes		zinc finger with KRAB and SCAN domains 7 [Source:HGNC Symbol;Acc:HGNC:12955]
ENSG00000196365	LONP1	269.311	0.371302	0.0971145	3.82335	0.000131652	0.00332687	Sig. genes		lon peptidase 1, mitochondrial [Source:HGNC Symbol;Acc:HGNC:9479]
ENSG00000196367	TRRAP	100.616	-0.753574	0.196271	-3.83945	0.000123309	0.00315045	Sig. genes		transformation/transcription domain associated protein [Source:HGNC Symbol;Acc:HGNC:12347]
ENSG00000196437	ZNF569	31.5603	-0.674265	0.223934	-3.011	0.00260389	0.0330984	Sig. genes		zinc finger protein 569 [Source:HGNC Symbol;Acc:HGNC:24737]
ENSG00000196482	ESRRG	67.4488	-0.739511	0.23782	-3.10954	0.00187381	0.0260337	Sig. genes		estrogen related receptor gamma [Source:HGNC Symbol;Acc:HGNC:3474]
ENSG00000196498	NCOR2	535.749	0.327354	0.106896	3.06237	0.0021959	0.0292406	Sig. genes		nuclear receptor corepressor 2 [Source:HGNC Symbol;Acc:HGNC:7673]
ENSG00000196526	AFAP1	230.314	0.875849	0.240932	3.63526	0.000277701	0.00594932	Sig. genes		actin filament associated protein 1 [Source:HGNC Symbol;Acc:HGNC:24017]
ENSG00000196535	MYO18A	596.581	-0.776611	0.127734	-6.07991	1.20247e-09	1.36306e-07	Sig. genes
ENSG00000196581	AJAP1	789.718	-0.742298	0.127901	-5.80368	6.48746e-09	6.18034e-07	Sig. genes		adherens junctions associated protein 1 [Source:HGNC Symbol;Acc:HGNC:30801]
ENSG00000196628	TCF4	5947.42	-0.413749	0.128722	-3.21428	0.00130774	0.0196656	Sig. genes		transcription factor 4 [Source:HGNC Symbol;Acc:HGNC:11634]
ENSG00000196743	GM2A	293.717	0.897752	0.119452	7.51559	5.66541e-14	1.47054e-11	Sig. genes		GM2 ganglioside activator [Source:HGNC Symbol;Acc:HGNC:4367]
ENSG00000196924	FLNA	1761.86	0.69912	0.127569	5.48034	4.245e-08	3.27707e-06	Sig. genes		filamin A [Source:HGNC Symbol;Acc:HGNC:3754]
ENSG00000196935	SRGAP1	296.708	0.970952	0.247665	3.92043	8.83908e-05	0.00240038	Sig. genes
ENSG00000196937	FAM3C	678.99	0.351948	0.120156	2.9291	0.0033995	0.0401352	Sig. genes		FAM3 metabolism regulating signaling molecule C [Source:HGNC Symbol;Acc:HGNC:18664]
ENSG00000196972	SMIM10L2B	66.226	-0.567651	0.155464	-3.65134	0.000260878	0.00567719	Sig. genes		small integral membrane protein 10 like 2B [Source:HGNC Symbol;Acc:HGNC:34500]
ENSG00000197043	ANXA6	453.553	-0.389617	0.107898	-3.61097	0.000305053	0.00636772	Sig. genes		annexin A6 [Source:HGNC Symbol;Acc:HGNC:544]
ENSG00000197063	MAFG	300.37	0.500431	0.094051	5.32085	1.03286e-07	7.19787e-06	Sig. genes		MAF bZIP transcription factor G [Source:HGNC Symbol;Acc:HGNC:6781]
ENSG00000197106	SLC6A17	3.46936	3.02423	0.942887	3.20741	0.00133936	0.0199899	Sig. genes		solute carrier family 6 member 17 [Source:HGNC Symbol;Acc:HGNC:31399]
ENSG00000197217	ENTPD4	239.476	0.345304	0.103975	3.32102	0.000896879	0.0146294	Sig. genes		ectonucleoside triphosphate diphosphohydrolase 4 [Source:HGNC Symbol;Acc:HGNC:14573]
ENSG00000197283	SYNGAP1	57.21	-0.735312	0.24677	-2.97975	0.00288485	0.0355104	Sig. genes		synaptic Ras GTPase activating protein 1 [Source:HGNC Symbol;Acc:HGNC:11497]
ENSG00000197444	OGDHL	55.2858	-0.889666	0.193316	-4.60212	4.1821e-06	0.000175309	Sig. genes		oxoglutarate dehydrogenase L [Source:HGNC Symbol;Acc:HGNC:25590]
ENSG00000197448	GSTK1	252.529	-0.531146	0.0763623	-6.9556	3.51065e-12	6.6889e-10	Sig. genes		glutathione S-transferase kappa 1 [Source:HGNC Symbol;Acc:HGNC:16906]
ENSG00000197461	PDGFA	756.297	0.497139	0.0887421	5.60207	2.11811e-08	1.76443e-06	Sig. genes		platelet derived growth factor subunit A [Source:HGNC Symbol;Acc:HGNC:8799]
ENSG00000197557	TTC30A	42.9084	-0.636421	0.198676	-3.20332	0.00135854	0.0202256	Sig. genes		tetratricopeptide repeat domain 30A [Source:HGNC Symbol;Acc:HGNC:25853]
ENSG00000197558	SSPOP	7.01497	-2.23866	0.571642	-3.9162	8.99567e-05	0.00242639	Sig. genes		SCO-spondin, pseudogene [Source:HGNC Symbol;Acc:HGNC:21998]
ENSG00000197565	COL4A6	105.844	-0.919021	0.175469	-5.2375	1.62762e-07	1.0639e-05	Sig. genes
ENSG00000197594	ENPP1	563.387	-0.725686	0.179238	-4.04873	5.14952e-05	0.00157386	Sig. genes		ectonucleotide pyrophosphatase/phosphodiesterase 1 [Source:HGNC Symbol;Acc:HGNC:3356]
ENSG00000197614	MFAP5	6.93539	2.50366	0.821795	3.04658	0.0023146	0.0304589	Sig. genes		microfibril associated protein 5 [Source:HGNC Symbol;Acc:HGNC:29673]
ENSG00000197635	DPP4	29.4657	1.11355	0.375938	2.96206	0.00305586	0.0370847	Sig. genes		dipeptidyl peptidase 4 [Source:HGNC Symbol;Acc:HGNC:3009]
ENSG00000197702	PARVA	619.808	0.264051	0.0739092	3.57264	0.000353402	0.00715999	Sig. genes		parvin alpha [Source:HGNC Symbol;Acc:HGNC:14652]
ENSG00000197756	RPL37A	19242.3	0.262127	0.0879679	2.9798	0.00288436	0.0355104	Sig. genes		ribosomal protein L37a [Source:HGNC Symbol;Acc:HGNC:10348]
ENSG00000197857	ZNF44	114.171	0.377356	0.104881	3.59795	0.000320734	0.00661792	Sig. genes		zinc finger protein 44 [Source:HGNC Symbol;Acc:HGNC:13110]
ENSG00000197892	KIF13B	157.023	-0.679002	0.159373	-4.26046	2.04004e-05	0.000712223	Sig. genes		kinesin family member 13B [Source:HGNC Symbol;Acc:HGNC:14405]
ENSG00000198003	ODAD3	32.0737	-1.11223	0.338876	-3.28211	0.00103032	0.0162868	Sig. genes		outer dynein arm docking complex subunit 3 [Source:HGNC Symbol;Acc:HGNC:28303]
ENSG00000198053	SIRPA	99.8607	0.708549	0.144731	4.89561	9.79988e-07	5.11708e-05	Sig. genes		signal regulatory protein alpha [Source:HGNC Symbol;Acc:HGNC:9662]
ENSG00000198074	AKR1B10	126.239	0.838926	0.214749	3.90655	9.36248e-05	0.00251021	Sig. genes		aldo-keto reductase family 1 member B10 [Source:HGNC Symbol;Acc:HGNC:382]
ENSG00000198133	TMEM229B	72.8335	-0.586065	0.186408	-3.14399	0.00166661	0.023822	Sig. genes		transmembrane protein 229B [Source:HGNC Symbol;Acc:HGNC:20130]
ENSG00000198157	HMGN5	109.619	-0.664226	0.194494	-3.41516	0.000637455	0.0112039	Sig. genes		high mobility group nucleosome binding domain 5 [Source:HGNC Symbol;Acc:HGNC:8013]
ENSG00000198355	PIM3	792.582	-0.245766	0.0702694	-3.49748	0.000469672	0.00892027	Sig. genes		Pim-3 proto-oncogene, serine/threonine kinase [Source:HGNC Symbol;Acc:HGNC:19310]
ENSG00000198380	GFPT1	480.665	0.312534	0.104223	2.99872	0.00271117	0.0341855	Sig. genes		glutamine--fructose-6-phosphate transaminase 1 [Source:HGNC Symbol;Acc:HGNC:4241]
ENSG00000198408	OGA	778.337	0.211669	0.0636271	3.3267	0.000878797	0.0144397	Sig. genes		O-GlcNAcase [Source:HGNC Symbol;Acc:HGNC:7056]
ENSG00000198431	TXNRD1	725.383	0.799732	0.13792	5.79854	6.68951e-09	6.30474e-07	Sig. genes
ENSG00000198467	TPM2	665.73	0.442732	0.121479	3.64451	0.000267898	0.00578078	Sig. genes		tropomyosin 2 [Source:HGNC Symbol;Acc:HGNC:12011]
ENSG00000198542	ITGBL1	1049.26	0.623851	0.170965	3.649	0.000263259	0.0056944	Sig. genes
ENSG00000198695	MT-ND6	592.51	-0.637755	0.219017	-2.9119	0.00359238	0.0416941	Sig. genes		mitochondrially encoded NADH:ubiquinone oxidoreductase core subunit 6 [Source:HGNC Symbol;Acc:HGNC:7462]
ENSG00000198730	CTR9	416.86	-0.230423	0.0798136	-2.88702	0.00388916	0.0442815	Sig. genes		CTR9 homolog, Paf1/RNA polymerase II complex component [Source:HGNC Symbol;Acc:HGNC:16850]
ENSG00000198732	SMOC1	106.774	0.601804	0.176311	3.4133	0.000641806	0.0112583	Sig. genes		SPARC related modular calcium binding 1 [Source:HGNC Symbol;Acc:HGNC:20318]
ENSG00000198740	ZNF652	335.023	-0.361325	0.102614	-3.52121	0.000429588	0.00831775	Sig. genes		zinc finger protein 652 [Source:HGNC Symbol;Acc:HGNC:29147]
ENSG00000198759	EGFL6	197.348	1.03089	0.329606	3.12765	0.0017621	0.0249086	Sig. genes		EGF like domain multiple 6 [Source:HGNC Symbol;Acc:HGNC:3235]
ENSG00000198796	ALPK2	166.81	1.72199	0.276365	6.23087	4.63864e-10	5.89207e-08	Sig. genes		alpha kinase 2 [Source:HGNC Symbol;Acc:HGNC:20565]
ENSG00000198856	OSTC	520.496	-0.433819	0.111585	-3.8878	0.000101156	0.00267214	Sig. genes		oligosaccharyltransferase complex non-catalytic subunit [Source:HGNC Symbol;Acc:HGNC:24448]
ENSG00000198873	GRK5	117.606	-0.39959	0.117549	-3.39935	0.000675454	0.011745	Sig. genes		G protein-coupled receptor kinase 5 [Source:HGNC Symbol;Acc:HGNC:4544]
ENSG00000198918	RPL39	7550.8	0.183086	0.0609693	3.00293	0.00267398	0.033889	Sig. genes		ribosomal protein L39 [Source:HGNC Symbol;Acc:HGNC:10350]
ENSG00000198944	SOWAHA	78.8265	-1.26674	0.203071	-6.23795	4.43341e-10	5.7124e-08	Sig. genes		sosondowah ankyrin repeat domain family member A [Source:HGNC Symbol;Acc:HGNC:27033]
ENSG00000202406	RN7SKP187	8.46466	-1.80308	0.608243	-2.96441	0.00303265	0.036974	Sig. genes		RN7SK pseudogene 187 [Source:HGNC Symbol;Acc:HGNC:45911]
ENSG00000203805	PLPP4	21.8822	1.39368	0.474369	2.93797	0.00330371	0.0391591	Sig. genes		phospholipid phosphatase 4 [Source:HGNC Symbol;Acc:HGNC:23531]
ENSG00000203875	SNHG5	2891.81	0.330895	0.0900025	3.67651	0.000236449	0.00528689	Sig. genes		small nucleolar RNA host gene 5 [Source:HGNC Symbol;Acc:HGNC:21026]
ENSG00000204084	INPP5B	112.48	0.325647	0.114739	2.83815	0.00453763	0.0495542	Sig. genes		inositol polyphosphate-5-phosphatase B [Source:HGNC Symbol;Acc:HGNC:6077]
ENSG00000204128	C2orf72	31.7119	-0.63855	0.223271	-2.85998	0.00423672	0.0470717	Sig. genes		chromosome 2 open reading frame 72 [Source:HGNC Symbol;Acc:HGNC:27418]
ENSG00000204179	PTPN20	11.9567	1.74646	0.510698	3.41976	0.00062676	0.0110812	Sig. genes		protein tyrosine phosphatase non-receptor type 20 [Source:HGNC Symbol;Acc:HGNC:23423]
ENSG00000204217	BMPR2	519.1	0.276833	0.0906328	3.05444	0.0022548	0.0298915	Sig. genes
ENSG00000204261	PSMB8-AS1	18.7746	-0.664216	0.225247	-2.94884	0.0031897	0.0381613	Sig. genes		PSMB8 antisense RNA 1 (head to head) [Source:HGNC Symbol;Acc:HGNC:39758]
ENSG00000204362	LINC02783	13.7116	1.3977	0.422614	3.30727	0.000942087	0.015188	Sig. genes		long intergenic non-protein coding RNA 2783 [Source:HGNC Symbol;Acc:HGNC:54303]
ENSG00000204387	SNHG32	1020.9	0.466551	0.096206	4.84949	1.23776e-06	6.14082e-05	Sig. genes		small nucleolar RNA host gene 32 [Source:HGNC Symbol;Acc:HGNC:19078]
ENSG00000204628	RACK1	3036.72	0.333765	0.0572269	5.83232	5.46633e-09	5.32076e-07	Sig. genes		receptor for activated C kinase 1 [Source:HGNC Symbol;Acc:HGNC:4399]
ENSG00000204843	DCTN1	378.832	0.301641	0.0865517	3.4851	0.000491961	0.00920429	Sig. genes		dynactin subunit 1 [Source:HGNC Symbol;Acc:HGNC:2711]
ENSG00000205358	MT1H	19.3377	2.00848	0.447282	4.49042	7.1084e-06	0.000282914	Sig. genes		metallothionein 1H [Source:HGNC Symbol;Acc:HGNC:7400]
ENSG00000205362	MT1A	34.3718	0.848452	0.251067	3.37938	0.000726489	0.012499	Sig. genes		metallothionein 1A [Source:HGNC Symbol;Acc:HGNC:7393]
ENSG00000205502	C2CD4B	13.7405	-1.26097	0.319261	-3.94966	7.82615e-05	0.00218929	Sig. genes		C2 calcium dependent domain containing 4B [Source:HGNC Symbol;Acc:HGNC:33628]
ENSG00000205517	RGL3	63.8069	-0.795797	0.19601	-4.05999	4.90748e-05	0.0015154	Sig. genes		ral guanine nucleotide dissociation stimulator like 3 [Source:HGNC Symbol;Acc:HGNC:30282]
ENSG00000205581	HMGN1	856.948	0.297304	0.0647285	4.59309	4.36722e-06	0.0001819	Sig. genes		high mobility group nucleosome binding domain 1 [Source:HGNC Symbol;Acc:HGNC:4984]
ENSG00000205707	ETFRF1	98.9164	-0.450706	0.135602	-3.32373	0.000888213	0.014541	Sig. genes		electron transfer flavoprotein regulatory factor 1 [Source:HGNC Symbol;Acc:HGNC:27052]
ENSG00000205838	TTC23L	8.25538	-2.75584	0.858791	-3.20898	0.00133207	0.0198977	Sig. genes		tetratricopeptide repeat domain 23 like [Source:HGNC Symbol;Acc:HGNC:26355]
ENSG00000205929	C21orf62	81.6856	-1.24933	0.246165	-5.07519	3.87112e-07	2.27317e-05	Sig. genes		chromosome 21 open reading frame 62 [Source:HGNC Symbol;Acc:HGNC:1305]
ENSG00000206588	RNU1-28P	27.4109	-10.9569	2.9573	-3.70502	0.000211374	0.0048287	Sig. genes		RNA, U1 small nuclear 28, pseudogene [Source:HGNC Symbol;Acc:HGNC:37498]
ENSG00000210082	MT-RNR2	421209	-0.277611	0.0925804	-2.99859	0.00271232	0.0341855	Sig. genes		mitochondrially encoded 16S rRNA [Source:HGNC Symbol;Acc:HGNC:7471]
ENSG00000210140	MT-TC	13.5527	-1.11377	0.291469	-3.82124	0.000132785	0.00334484	Sig. genes		mitochondrially encoded tRNA-Cys (UGU/C) [Source:HGNC Symbol;Acc:HGNC:7477]
ENSG00000210194	MT-TE	102.324	-0.695149	0.21831	-3.18423	0.00145141	0.021364	Sig. genes		mitochondrially encoded tRNA-Glu (GAA/G) [Source:HGNC Symbol;Acc:HGNC:7479]
ENSG00000211445	GPX3	239.448	0.749595	0.150211	4.99027	6.02943e-07	3.34326e-05	Sig. genes
ENSG00000211459	MT-RNR1	67836	-0.245267	0.0855635	-2.86649	0.00415053	0.046431	Sig. genes		mitochondrially encoded 12S rRNA [Source:HGNC Symbol;Acc:HGNC:7470]
ENSG00000212283	SNORD89	37.4578	-0.797115	0.210225	-3.79173	0.000149604	0.00369065	Sig. genes		small nucleolar RNA, C/D box 89 [Source:HGNC Symbol;Acc:HGNC:32750]
ENSG00000212694	LINC01089	66.096	-0.525761	0.165263	-3.18136	0.00146588	0.0215196	Sig. genes		long intergenic non-protein coding RNA 1089 [Source:HGNC Symbol;Acc:HGNC:27886]
ENSG00000212766	EWSAT1	16.9289	-1.44046	0.501197	-2.87404	0.00405252	0.0454766	Sig. genes		Ewing sarcoma associated transcript 1 [Source:HGNC Symbol;Acc:HGNC:26596]
ENSG00000212864	RNF208	45.3703	-0.543912	0.176877	-3.07508	0.00210443	0.028296	Sig. genes
ENSG00000213047	DENND1B	198.463	-0.625292	0.21501	-2.9082	0.00363518	0.0421127	Sig. genes		DENN domain containing 1B [Source:HGNC Symbol;Acc:HGNC:28404]
ENSG00000213085	CFAP45	26.8099	-0.899751	0.308242	-2.91898	0.00351177	0.0410816	Sig. genes		cilia and flagella associated protein 45 [Source:HGNC Symbol;Acc:HGNC:17229]
ENSG00000213190	MLLT11	157.132	0.376684	0.102968	3.65824	0.00025395	0.00555341	Sig. genes		MLLT11 transcription factor 7 cofactor [Source:HGNC Symbol;Acc:HGNC:16997]
ENSG00000213281	NRAS	66.9838	0.598595	0.170036	3.5204	0.000430891	0.00833397	Sig. genes		NRAS proto-oncogene, GTPase [Source:HGNC Symbol;Acc:HGNC:7989]
ENSG00000213593	TMX2	417.391	-0.257644	0.0675921	-3.81175	0.000137984	0.00345153	Sig. genes		thioredoxin related transmembrane protein 2 [Source:HGNC Symbol;Acc:HGNC:30739]
ENSG00000213626	LBH	211.165	1.1836	0.209438	5.65131	1.59229e-08	1.358e-06	Sig. genes		LBH regulator of WNT signaling pathway [Source:HGNC Symbol;Acc:HGNC:29532]
ENSG00000213689	TREX1	39.4268	-0.684071	0.221029	-3.09494	0.00196855	0.0269312	Sig. genes		three prime repair exonuclease 1 [Source:HGNC Symbol;Acc:HGNC:12269]
ENSG00000213741	RPS29	13435.6	0.275594	0.0785259	3.50959	0.000448796	0.00860593	Sig. genes		ribosomal protein S29 [Source:HGNC Symbol;Acc:HGNC:10419]
ENSG00000213889	PPM1N	15.1518	-1.09473	0.314342	-3.48262	0.000496541	0.00924434	Sig. genes		protein phosphatase, Mg2+/Mn2+ dependent 1N (putative) [Source:HGNC Symbol;Acc:HGNC:26845]
ENSG00000213930	GALT	166.608	-0.589781	0.0973353	-6.05927	1.36742e-09	1.52114e-07	Sig. genes		galactose-1-phosphate uridylyltransferase [Source:HGNC Symbol;Acc:HGNC:4135]
ENSG00000213977	TAX1BP3	238.328	0.459993	0.13928	3.30264	0.000957786	0.0153402	Sig. genes		Tax1 binding protein 3 [Source:HGNC Symbol;Acc:HGNC:30684]
ENSG00000214100	PLAC9P1	53.5863	1.32693	0.273042	4.8598	1.17504e-06	5.92816e-05	Sig. genes
ENSG00000214290	COLCA2	7.48509	1.50312	0.433055	3.47097	0.000518584	0.00954557	Sig. genes
ENSG00000214293	APTR	48.6451	-0.560358	0.193358	-2.89803	0.00375512	0.0431947	Sig. genes
ENSG00000214357	NEURL1B	28.7206	3.44785	0.581156	5.93274	2.97916e-09	3.10214e-07	Sig. genes		neuralized E3 ubiquitin protein ligase 1B [Source:HGNC Symbol;Acc:HGNC:35422]
ENSG00000214402	LCNL1	115.976	-1.21029	0.210075	-5.76122	8.35078e-09	7.63074e-07	Sig. genes		lipocalin like 1 [Source:HGNC Symbol;Acc:HGNC:34436]
ENSG00000214447	FAM187A	44.2906	-1.37387	0.182715	-7.51918	5.51215e-14	1.4518e-11	Sig. genes
ENSG00000214456	PLIN5	69.1401	-1.04297	0.204296	-5.10518	3.3048e-07	1.9599e-05	Sig. genes		perilipin 5 [Source:HGNC Symbol;Acc:HGNC:33196]
ENSG00000215039	CD27-AS1	63.7293	-0.566046	0.181091	-3.12575	0.00177354	0.0250309	Sig. genes
ENSG00000215183	MSMP	1433.8	-1.05103	0.227873	-4.61233	3.98179e-06	0.000167403	Sig. genes		microseminoprotein, prostate associated [Source:HGNC Symbol;Acc:HGNC:29663]
ENSG00000215472	RPL17-C18orf32	1201.18	0.218612	0.0583567	3.74613	0.000179582	0.00423757	Sig. genes		RPL17-C18orf32 readthrough [Source:HGNC Symbol;Acc:HGNC:44661]
ENSG00000215769	ARHGAP27P1-BPTFP1-KPNA2P3	59.0346	0.593954	0.167662	3.54257	0.000396247	0.00780724	Sig. genes		ARHGAP27P1-BPTFP1-KPNA2P3 readthrough, transcribed pseudogene [Source:HGNC Symbol;Acc:HGNC:52873]
ENSG00000215788	TNFRSF25	128.787	-0.411885	0.108295	-3.80335	0.000142755	0.00355597	Sig. genes		TNF receptor superfamily member 25 [Source:HGNC Symbol;Acc:HGNC:11910]
ENSG00000215845	TSTD1	185.568	-0.833233	0.115102	-7.2391	4.51678e-13	9.8653e-11	Sig. genes		thiosulfate sulfurtransferase like domain containing 1 [Source:HGNC Symbol;Acc:HGNC:35410]
ENSG00000218052	ADAMTS7P4	29.052	-2.84622	0.4536	-6.27474	3.50225e-10	4.5785e-08	Sig. genes
ENSG00000219438	TAFA5	72.5781	0.903851	0.174743	5.17247	2.31018e-07	1.45177e-05	Sig. genes		TAFA chemokine like family member 5 [Source:HGNC Symbol;Acc:HGNC:21592]
ENSG00000220205	VAMP2	273.517	-0.281893	0.0858651	-3.28298	0.00102716	0.0162513	Sig. genes		vesicle associated membrane protein 2 [Source:HGNC Symbol;Acc:HGNC:12643]
ENSG00000220848	RPS18P9	101.427	0.57262	0.168486	3.39862	0.000677256	0.0117649	Sig. genes		ribosomal protein S18 pseudogene 9 [Source:HGNC Symbol;Acc:HGNC:36483]
ENSG00000221817	PPP3CB-AS1	17.2361	-1.20707	0.403464	-2.99176	0.0027737	0.0347392	Sig. genes
ENSG00000221843	C2orf16	9.86218	1.54415	0.457953	3.37185	0.000746647	0.0127633	Sig. genes
ENSG00000221968	FADS3	151.931	0.71311	0.151039	4.72136	2.34276e-06	0.000106495	Sig. genes		fatty acid desaturase 3 [Source:HGNC Symbol;Acc:HGNC:3576]
ENSG00000221988	PPT2	58.5536	-0.430953	0.139523	-3.08877	0.0020099	0.0273328	Sig. genes		palmitoyl-protein thioesterase 2 [Source:HGNC Symbol;Acc:HGNC:9326]
ENSG00000222041	CYTOR	1235.22	0.430641	0.0836462	5.14837	2.62765e-07	1.61722e-05	Sig. genes
ENSG00000223572	CKMT1A	31.2786	-1.35603	0.283449	-4.78402	1.71826e-06	8.07717e-05	Sig. genes		creatine kinase, mitochondrial 1A [Source:HGNC Symbol;Acc:HGNC:31736]
ENSG00000223745	CCDC18-AS1	189.001	-0.411167	0.138633	-2.96587	0.0030183	0.0368492	Sig. genes		CCDC18 antisense RNA 1 [Source:HGNC Symbol;Acc:HGNC:52262]
ENSG00000224020	MIR181A2HG	15.6625	1.84675	0.41823	4.41563	1.00715e-05	0.000391282	Sig. genes
ENSG00000224109	CENPVL3	9.26482	-1.44753	0.395093	-3.66378	0.000248522	0.00549044	Sig. genes		centromere protein V like 3 [Source:HGNC Symbol;Acc:HGNC:43880]
ENSG00000224184	MIR3681HG	7.77865	-2.4413	0.593056	-4.11648	3.84707e-05	0.00123478	Sig. genes		MIR3681 host gene [Source:HGNC Symbol;Acc:HGNC:52001]
ENSG00000224348	RP11-306K13.1	4.38334	2.4627	0.786925	3.12953	0.00175088	0.0248088	Sig. genes		ribosomal protein L36 (RPL36) pseudogene
ENSG00000224805	LINC00853	4.84403	-2.06431	0.627949	-3.28738	0.00101123	0.0160275	Sig. genes		long intergenic non-protein coding RNA 853 [Source:HGNC Symbol;Acc:HGNC:43716]
ENSG00000225830	ERCC6	521.382	-0.527811	0.148671	-3.55018	0.000384963	0.00764084	Sig. genes		ERCC excision repair 6, chromatin remodeling factor [Source:HGNC Symbol;Acc:HGNC:3438]
ENSG00000225889	AC074289.1	50.873	-1.03476	0.302755	-3.41781	0.00063126	0.011127	Sig. genes
ENSG00000226266	AC009961.3	15.2879	-0.985834	0.295049	-3.34126	0.000833998	0.0139077	Sig. genes
ENSG00000226380	AC058791.1	74.7956	0.990722	0.348155	2.84563	0.00443233	0.0487267	Sig. genes		novel transcript
ENSG00000227051	C14orf132	743.88	-0.407694	0.124249	-3.28126	0.00103343	0.0163216	Sig. genes		chromosome 14 open reading frame 132 [Source:HGNC Symbol;Acc:HGNC:20346]
ENSG00000227533	SLC2A1-AS1	172.94	-0.423398	0.117353	-3.6079	0.000308686	0.00642857	Sig. genes
ENSG00000228061	Z83001.1	5.74415	3.16177	0.743434	4.25292	2.10998e-05	0.000729532	Sig. genes		novel transcript, antisense to ELP4
ENSG00000228594	FNDC10	15.6986	-1.34782	0.296827	-4.54077	5.60489e-06	0.000229711	Sig. genes		fibronectin type III domain containing 10 [Source:HGNC Symbol;Acc:HGNC:42951]
ENSG00000228716	DHFR	356.297	-0.227609	0.0570121	-3.9923	6.54355e-05	0.0018998	Sig. genes		dihydrofolate reductase [Source:HGNC Symbol;Acc:HGNC:2861]
ENSG00000228903	RASA4CP	13.6331	-0.960017	0.270057	-3.55487	0.000378167	0.00755069	Sig. genes		RAS p21 protein activator 4C, pseudogene [Source:HGNC Symbol;Acc:HGNC:44185]
ENSG00000229119	CTB-63M22.1	67.0057	0.71347	0.16034	4.44973	8.59769e-06	0.000338428	Sig. genes		60S acidic ribosomal protein (RPLP0) pseudogene
ENSG00000229743	LINC01159	37.1981	-0.816041	0.230609	-3.53863	0.000402207	0.00789861	Sig. genes
ENSG00000230528	NOS2P3	14.8383	-1.38771	0.464825	-2.98545	0.00283157	0.0350716	Sig. genes		nitric oxide synthase 2 pseudogene 3 [Source:HGNC Symbol;Acc:HGNC:35124]
ENSG00000230596	GPAA1P2	9.15663	0.948112	0.332568	2.85088	0.00435983	0.0482004	Sig. genes		glycosylphosphatidylinositol anchor attachment 1 pseudogene 2 [Source:HGNC Symbol;Acc:HGNC:51484]
ENSG00000231500	RPS18	8037.62	0.208068	0.061112	3.4047	0.000662377	0.0115487	Sig. genes		ribosomal protein S18 [Source:HGNC Symbol;Acc:HGNC:10401]
ENSG00000231925	TAPBP	890.948	-0.419934	0.0772248	-5.43781	5.3938e-08	4.05895e-06	Sig. genes
ENSG00000232110	RP11-149I23.3	867.261	-0.997051	0.15886	-6.27629	3.46743e-10	4.5663e-08	Sig. genes		novel transcript, antisense to LIPA
ENSG00000232533	AC093673.5	69.7233	0.684193	0.160832	4.25408	2.0991e-05	0.000727172	Sig. genes
ENSG00000232650	LINC01780	5.68844	-2.56431	0.730215	-3.51172	0.000445212	0.00856472	Sig. genes		long intergenic non-protein coding RNA 1780 [Source:HGNC Symbol;Acc:HGNC:52570]
ENSG00000232679	LINC01705	14.9291	5.127	0.905683	5.66091	1.50568e-08	1.29028e-06	Sig. genes		long intergenic non-protein coding RNA 1705 [Source:HGNC Symbol;Acc:HGNC:52493]
ENSG00000233016	SNHG7	231.263	0.510108	0.133362	3.825	0.000130773	0.00331278	Sig. genes
ENSG00000233024	NPIPA9	233.877	1.67143	0.547956	3.05029	0.00228619	0.0302182	Sig. genes		nuclear pore complex interacting protein family, member A9 [Source:HGNC Symbol;Acc:HGNC:41984]
ENSG00000233058	LINC00884	32.1692	-0.733273	0.23439	-3.12843	0.00175742	0.0248621	Sig. genes
ENSG00000233117	LINC00702	9.96341	2.01765	0.61293	3.29181	0.000995447	0.0157914	Sig. genes		long intergenic non-protein coding RNA 702 [Source:HGNC Symbol;Acc:HGNC:44676]
ENSG00000233175	CTD-2020K17.3	12.7991	-1.78094	0.540643	-3.29411	0.000987328	0.0156765	Sig. genes		FMNL1 antisense RNA 1 [Source:HGNC Symbol;Acc:HGNC:55717]
ENSG00000233682	RP11-13P5.2	14.7149	2.70342	0.526911	5.13069	2.88682e-07	1.7646e-05	Sig. genes		FNDC1 antisense RNA 1 [Source:HGNC Symbol;Acc:HGNC:55706]
ENSG00000233705	SLC26A4-AS1	14.1709	-1.97223	0.503159	-3.91969	8.86623e-05	0.00240233	Sig. genes
ENSG00000233927	RPS28	8395.51	0.276745	0.0612829	4.51586	6.3059e-06	0.00025494	Sig. genes		ribosomal protein S28 [Source:HGNC Symbol;Acc:HGNC:10418]
ENSG00000233975	LINC02574	831.599	-0.596896	0.156137	-3.82291	0.000131886	0.00332687	Sig. genes		long intergenic non-protein coding RNA 2574 [Source:HGNC Symbol;Acc:HGNC:53746]
ENSG00000234028	EIF2AK3-DT	12.3914	-1.16948	0.401646	-2.91172	0.0035944	0.0416941	Sig. genes
ENSG00000234741	GAS5	628.523	0.339699	0.0950175	3.57511	0.000350074	0.0071006	Sig. genes
ENSG00000235039	MTND6P12	3.87979	-2.71139	0.780667	-3.47317	0.000514345	0.00947828	Sig. genes		MT-ND6 pseudogene 12 [Source:HGNC Symbol;Acc:HGNC:39475]
ENSG00000235169	SMIM1	44.1777	-0.812349	0.230087	-3.53062	0.000414584	0.00807086	Sig. genes		small integral membrane protein 1 (Vel blood group) [Source:HGNC Symbol;Acc:HGNC:44204]
ENSG00000235385	LINC02154	18.7265	1.09453	0.382559	2.86108	0.00422207	0.0469964	Sig. genes
ENSG00000235501	CNN3-DT	43.7486	0.79215	0.186123	4.25607	2.08056e-05	0.00072355	Sig. genes
ENSG00000235531	MSC-AS1	25.0899	1.78344	0.475913	3.74739	0.000178681	0.00422188	Sig. genes		MSC antisense RNA 1 [Source:HGNC Symbol;Acc:HGNC:48724]
ENSG00000236155	ZPLD2P	17.4003	-1.08776	0.332691	-3.26958	0.00107708	0.0168623	Sig. genes
ENSG00000236438	FAM157A	52.9971	-2.2498	0.791268	-2.84329	0.00446511	0.0490012	Sig. genes		family with sequence similarity 157 member A [Source:HGNC Symbol;Acc:HGNC:34079]
ENSG00000236548	RNF217-AS1	22.9542	1.09624	0.307482	3.56522	0.000363546	0.00731585	Sig. genes
ENSG00000236552	RPL13AP5	119.932	0.350737	0.121216	2.89349	0.00380982	0.043658	Sig. genes		ribosomal protein L13a pseudogene 5 [Source:HGNC Symbol;Acc:HGNC:23736]
ENSG00000237289	CKMT1B	22.4878	-1.08537	0.324968	-3.33993	0.000837983	0.0139482	Sig. genes		creatine kinase, mitochondrial 1B [Source:HGNC Symbol;Acc:HGNC:1995]
ENSG00000238197	PAXBP1-AS1	18.9943	-1.19448	0.275921	-4.32905	1.49755e-05	0.000538577	Sig. genes
ENSG00000238297	U3	100.46	-1.28678	0.176234	-7.30155	2.8448e-13	6.70399e-11	Sig. genes		Small nucleolar RNA U3 [Source:RFAM;Acc:RF00012]
ENSG00000239039	SNORD13	168.214	-0.576766	0.18798	-3.06824	0.00215324	0.0287941	Sig. genes		small nucleolar RNA, C/D box 13 [Source:HGNC Symbol;Acc:HGNC:32711]
ENSG00000239264	TXNDC5	356.444	0.502659	0.0906999	5.542	2.99029e-08	2.38027e-06	Sig. genes		thioredoxin domain containing 5 [Source:HGNC Symbol;Acc:HGNC:21073]
ENSG00000239794	RN7SL653P	9.67645	-1.89118	0.480531	-3.93559	8.29911e-05	0.00229151	Sig. genes		RNA, 7SL, cytoplasmic 653, pseudogene [Source:HGNC Symbol;Acc:HGNC:46669]
ENSG00000240184	PCDHGC3	433.868	-0.332643	0.106998	-3.10888	0.00187797	0.0260531	Sig. genes		protocadherin gamma subfamily C, 3 [Source:HGNC Symbol;Acc:HGNC:8716]
ENSG00000240445	FOXO3B	67.448	0.612814	0.215739	2.84053	0.00450382	0.0492751	Sig. genes		forkhead box O3B [Source:HGNC Symbol;Acc:HGNC:3822]
ENSG00000240541	TM4SF1-AS1	42.5077	-1.46223	0.449386	-3.25384	0.00113855	0.017655	Sig. genes		TM4SF1 antisense RNA 1 [Source:HGNC Symbol;Acc:HGNC:40587]
ENSG00000241158	ADAMTS9-AS1	36.8467	-2.2922	0.522819	-4.3843	1.1636e-05	0.000436901	Sig. genes		ADAMTS9 antisense RNA 1 [Source:HGNC Symbol;Acc:HGNC:40625]
ENSG00000241399	CD302	124.827	-0.752888	0.199531	-3.77329	0.000161111	0.00390477	Sig. genes		CD302 molecule [Source:HGNC Symbol;Acc:HGNC:30843]
ENSG00000241837	ATP5PO	901.841	-0.271609	0.0729495	-3.72324	0.000196679	0.00458066	Sig. genes		ATP synthase peripheral stalk subunit OSCP [Source:HGNC Symbol;Acc:HGNC:850]
ENSG00000242094	FOXP1-IT1	46.176	0.988503	0.255329	3.87149	0.00010817	0.0028241	Sig. genes		FOXP1 intronic transcript 1 [Source:HGNC Symbol;Acc:HGNC:41335]
ENSG00000243089	RP11-779P15.2	18.7395	1.33048	0.461063	2.88568	0.00390569	0.0443569	Sig. genes		novel transcript
ENSG00000243649	CFB	206.396	-0.822055	0.138008	-5.9566	2.57546e-09	2.76206e-07	Sig. genes		complement factor B [Source:HGNC Symbol;Acc:HGNC:1037]
ENSG00000243749	TMEM35B	95.1711	0.671408	0.169887	3.9521	7.74694e-05	0.00217814	Sig. genes		transmembrane protein 35B [Source:HGNC Symbol;Acc:HGNC:40021]
ENSG00000243927	MRPS6	506.249	-0.47548	0.108048	-4.40064	1.07931e-05	0.000412162	Sig. genes		mitochondrial ribosomal protein S6 [Source:HGNC Symbol;Acc:HGNC:14051]
ENSG00000244187	TMEM141	181.911	-0.369593	0.11187	-3.30378	0.000953898	0.0153147	Sig. genes		transmembrane protein 141 [Source:HGNC Symbol;Acc:HGNC:28211]
ENSG00000244480	AC005154.7	12.0147	-1.09751	0.380454	-2.88475	0.00391728	0.0444322	Sig. genes		pseudogene similar golgi autoantigen, golgin subfamily a, 8A GOLGA8A
ENSG00000244509	APOBEC3C	280.917	-0.352375	0.0928008	-3.79711	0.000146392	0.00363645	Sig. genes		apolipoprotein B mRNA editing enzyme catalytic subunit 3C [Source:HGNC Symbol;Acc:HGNC:17353]
ENSG00000244879	GABPB1-AS1	897.28	-0.355921	0.101632	-3.50204	0.000461702	0.00881565	Sig. genes
ENSG00000245532	NEAT1	13563.3	-0.476898	0.133688	-3.56724	0.000360761	0.00726797	Sig. genes
ENSG00000245571	FAM111A-DT	40.635	-0.477444	0.150218	-3.17835	0.00148116	0.0216905	Sig. genes		FAM111A divergent transcript [Source:HGNC Symbol;Acc:HGNC:53752]
ENSG00000245958	SEPTIN7P14	49.5774	-0.57544	0.186554	-3.08458	0.0020384	0.0276574	Sig. genes
ENSG00000246067	RAB30-DT	179.519	-0.562646	0.167684	-3.35541	0.000792488	0.0133523	Sig. genes
ENSG00000246430	LINC00968	11.2358	1.84903	0.525879	3.51608	0.000437971	0.00844355	Sig. genes
ENSG00000246705	H2AJ	362.315	-0.491655	0.0603729	-8.14364	3.83561e-16	1.46161e-13	Sig. genes
ENSG00000247828	TMEM161B-AS1	360.506	-0.412067	0.131442	-3.13497	0.00171871	0.0244691	Sig. genes
ENSG00000248079	DPH6-DT	7.68043	-2.06581	0.694357	-2.97514	0.00292858	0.0359253	Sig. genes		DPH6 divergent transcript [Source:HGNC Symbol;Acc:HGNC:44147]
ENSG00000248098	BCKDHA	190.918	-0.276219	0.08872	-3.11338	0.00184958	0.025779	Sig. genes		branched chain keto acid dehydrogenase E1 subunit alpha [Source:HGNC Symbol;Acc:HGNC:986]
ENSG00000248144	ADH1C	9.85891	1.73871	0.467718	3.71743	0.000201263	0.0046606	Sig. genes		alcohol dehydrogenase 1C (class I), gamma polypeptide [Source:HGNC Symbol;Acc:HGNC:251]
ENSG00000248323	LUCAT1	240.184	1.04082	0.226179	4.60176	4.1894e-06	0.000175309	Sig. genes
ENSG00000248464	FGF10-AS1	37.64	-0.705147	0.246244	-2.86361	0.00418842	0.0467381	Sig. genes		FGF10 antisense RNA 1 [Source:HGNC Symbol;Acc:HGNC:49382]
ENSG00000248712	CCDC153	13.2108	-1.94867	0.479946	-4.06019	4.90337e-05	0.0015154	Sig. genes
ENSG00000249740	OSMR-AS1	13.612	1.50751	0.396661	3.80051	0.000144401	0.00359198	Sig. genes
ENSG00000249992	TMEM158	125.8	0.897664	0.211638	4.2415	2.22029e-05	0.00075888	Sig. genes		transmembrane protein 158 [Source:HGNC Symbol;Acc:HGNC:30293]
ENSG00000250222	CTC-338M12.5	18.4876	-0.887721	0.299113	-2.96784	0.00299899	0.0366384	Sig. genes
ENSG00000250241	RP11-9G1.3	7.79685	3.0375	0.655922	4.63088	3.64113e-06	0.000154899	Sig. genes
ENSG00000250479	CHCHD10	843.959	-0.408001	0.100243	-4.07013	4.69875e-05	0.00146346	Sig. genes		coiled-coil-helix-coiled-coil-helix domain containing 10 [Source:HGNC Symbol;Acc:HGNC:15559]
ENSG00000250511	RP11-380D23.1	10.3576	-1.23208	0.434523	-2.83547	0.00457589	0.0498686	Sig. genes		novel transcript, antisense to ENPEP
ENSG00000251615	RP11-774O3.3	44.3762	0.667745	0.198622	3.36189	0.000774105	0.0131042	Sig. genes		novel transcript
ENSG00000253352	TUG1	723.299	0.216228	0.0730425	2.9603	0.00307337	0.0372171	Sig. genes		taurine up-regulated 1 [Source:HGNC Symbol;Acc:HGNC:26066]
ENSG00000253361	RP11-675F6.4	18.5357	-0.902424	0.308246	-2.92761	0.00341575	0.0403005	Sig. genes		novel transcript
ENSG00000253558	CTD-2179L22.1	11.6502	-1.70901	0.383327	-4.45836	8.25888e-06	0.000326527	Sig. genes
ENSG00000253669	GASAL1	26.6943	0.811756	0.276783	2.93282	0.00335898	0.0397353	Sig. genes		growth arrest associated lncRNA 1 [Source:HGNC Symbol;Acc:HGNC:53461]
ENSG00000253738	OTUD6B-AS1	479.004	-0.311386	0.071461	-4.35742	1.31604e-05	0.000481497	Sig. genes
ENSG00000254703	SENCR	17.2271	-1.09583	0.343188	-3.1931	0.00140754	0.020903	Sig. genes
ENSG00000254901	BORCS8	104.39	-0.466933	0.126174	-3.7007	0.000215007	0.00489298	Sig. genes		BLOC-1 related complex subunit 8 [Source:HGNC Symbol;Acc:HGNC:37247]
ENSG00000254911	SCARNA9	178.599	-0.582783	0.143982	-4.0476	5.17446e-05	0.00157878	Sig. genes		small Cajal body-specific RNA 9 [Source:HGNC Symbol;Acc:HGNC:32566]
ENSG00000255302	EID1	2073.87	-0.223402	0.0715593	-3.12191	0.00179684	0.0252403	Sig. genes		EP300 interacting inhibitor of differentiation 1 [Source:HGNC Symbol;Acc:HGNC:1191]
ENSG00000255727	LINC01489	7.8538	-1.81288	0.561514	-3.22856	0.00124414	0.0188832	Sig. genes		long intergenic non-protein coding RNA 1489 [Source:HGNC Symbol;Acc:HGNC:51145]
ENSG00000257354	RP11-631N16.2	94.2808	0.613765	0.148774	4.12548	3.6996e-05	0.00119387	Sig. genes		MIRLET7I host gene [Source:HGNC Symbol;Acc:HGNC:55478]
ENSG00000257411	RP11-603J24.9	279.116	-0.367791	0.116454	-3.15824	0.00158723	0.0229438	Sig. genes		novel protein
ENSG00000257605	MYG1-AS1	5.14724	1.62509	0.561326	2.89509	0.00379048	0.0435176	Sig. genes
ENSG00000257894	RP1-78O14.1	38.204	0.997259	0.281876	3.53794	0.000403268	0.00790731	Sig. genes		novel transcript
ENSG00000258388	PPT2-EGFL8	57.0667	-0.459262	0.153507	-2.99179	0.00277346	0.0347392	Sig. genes		PPT2-EGFL8 readthrough (NMD candidate) [Source:HGNC Symbol;Acc:HGNC:48343]
ENSG00000258636	CTD-2298J14.2	14.1424	2.08363	0.59249	3.51673	0.000436891	0.0084409	Sig. genes		LRFN5 divergent transcript [Source:HGNC Symbol;Acc:HGNC:55444]
ENSG00000258667	HIF1A-AS3	44.406	0.806068	0.239527	3.36525	0.00076474	0.0129948	Sig. genes		HIF1A antisense RNA 3 [Source:HGNC Symbol;Acc:HGNC:54284]
ENSG00000258967	HMGN1P3	32.84	1.20074	0.221182	5.42873	5.6755e-08	4.18305e-06	Sig. genes		high mobility group nucleosome binding domain 1 pseudogene 3 [Source:HGNC Symbol;Acc:HGNC:23343]
ENSG00000259207	ITGB3	45.0309	1.09345	0.329169	3.32186	0.00089419	0.0145989	Sig. genes		integrin subunit beta 3 [Source:HGNC Symbol;Acc:HGNC:6156]
ENSG00000259345	RP11-624L4.1	17.0286	1.76308	0.378782	4.6546	3.24606e-06	0.000140427	Sig. genes		novel transcript
ENSG00000259673	IQCH-AS1	23.2637	-0.895027	0.293004	-3.05465	0.0022532	0.0298915	Sig. genes		IQCH antisense RNA 1 [Source:HGNC Symbol;Acc:HGNC:44104]
ENSG00000260266	PPIAP46	5.60984	-1.67977	0.582782	-2.88234	0.00394739	0.0446606	Sig. genes		peptidylprolyl isomerase A pseudogene 46 [Source:HGNC Symbol;Acc:HGNC:53670]
ENSG00000260549	MT1L	63.4025	0.961079	0.181533	5.29422	1.19523e-07	8.20172e-06	Sig. genes
ENSG00000260816	RP11-319G9.3	46.9472	-0.5085	0.159344	-3.19121	0.0014168	0.0210056	Sig. genes		novel transcript, sense intronic to WWOX
ENSG00000260916	CCPG1	890.716	0.256203	0.08449	3.03234	0.00242665	0.0315394	Sig. genes		cell cycle progression 1 [Source:HGNC Symbol;Acc:HGNC:24227]
ENSG00000261098	RP11-819C21.1	34.0864	-0.62073	0.217527	-2.85358	0.00432296	0.047911	Sig. genes		novel transcript
ENSG00000261324	RP11-174G6.5	115.057	-0.393783	0.128319	-3.06879	0.00214927	0.0287694	Sig. genes		novel transcript, overlapping HIST4H4
ENSG00000261824	LINC00662	258.488	0.476327	0.120906	3.93965	8.16007e-05	0.00226584	Sig. genes
ENSG00000261971	MMP25-AS1	16.2369	-1.01653	0.289079	-3.51643	0.000437397	0.00844158	Sig. genes
ENSG00000262454	MIR193BHG	142.776	1.28096	0.339927	3.76834	0.000164337	0.00394898	Sig. genes		MIR193b-365a host gene [Source:HGNC Symbol;Acc:HGNC:51945]
ENSG00000262655	SPON1	301.66	-1.21599	0.22763	-5.34198	9.19361e-08	6.48258e-06	Sig. genes		spondin 1 [Source:HGNC Symbol;Acc:HGNC:11252]
ENSG00000263001	GTF2I	529.547	-0.347262	0.09256	-3.75174	0.000175609	0.00416577	Sig. genes
ENSG00000263004	AKAP1-DT	46.903	-0.784282	0.237485	-3.30245	0.000958439	0.0153402	Sig. genes
ENSG00000263155	MYZAP	140.285	-1.26136	0.165885	-7.60378	2.87598e-14	8.17599e-12	Sig. genes		myocardial zonula adherens protein [Source:HGNC Symbol;Acc:HGNC:43444]
ENSG00000265681	RPL17	1573.82	0.266022	0.0675522	3.93802	8.21565e-05	0.00227422	Sig. genes		ribosomal protein L17 [Source:HGNC Symbol;Acc:HGNC:10307]
ENSG00000265972	TXNIP	1009.87	0.975898	0.128187	7.61306	2.67678e-14	7.73245e-12	Sig. genes		thioredoxin interacting protein [Source:HGNC Symbol;Acc:HGNC:16952]
ENSG00000266402	SNHG25	1001.97	-0.390607	0.0924205	-4.22641	2.37452e-05	0.000800899	Sig. genes
ENSG00000266714	MYO15B	57.3142	-1.16314	0.257013	-4.5256	6.02254e-06	0.000244589	Sig. genes
ENSG00000266903	CEACAM16-AS1	10.3946	-1.70352	0.55252	-3.08319	0.00204797	0.0277222	Sig. genes		CEACAM16, CEACAM19 and PVR antisense RNA 1 [Source:HGNC Symbol;Acc:HGNC:55317]
ENSG00000267169	ADGRL1-AS1	14.3264	1.73116	0.498011	3.47615	0.000508663	0.00942106	Sig. genes		ADGRL1 antisense RNA 1 [Source:HGNC Symbol;Acc:HGNC:55309]
ENSG00000267280	TBX2-AS1	147.803	-0.865108	0.199171	-4.34355	1.40199e-05	0.000506244	Sig. genes
ENSG00000267385	CTB-50L17.14	11.3148	-1.83337	0.443271	-4.13599	3.53423e-05	0.00114741	Sig. genes		novel protein
ENSG00000268584	RP11-464F9.20	4.34665	-1.99597	0.696188	-2.867	0.00414379	0.0463845	Sig. genes		novel transcript, antisense to USP54
ENSG00000268628	RP1-122P22.4	6.94186	-1.59935	0.479537	-3.3352	0.000852386	0.0141485	Sig. genes		novel transcript
ENSG00000268996	MAN1B1-DT	94.1973	-0.409168	0.138517	-2.95393	0.00313758	0.0377395	Sig. genes		MAN1B1 divergent transcript [Source:HGNC Symbol;Acc:HGNC:48715]
ENSG00000269313	MAGIX	17.8145	-1.12558	0.349349	-3.22194	0.00127324	0.0192437	Sig. genes		MAGI family member, X-linked [Source:HGNC Symbol;Acc:HGNC:30006]
ENSG00000269896	RP4-740C4.5	53.3887	-2.54059	0.593828	-4.27832	1.88306e-05	0.000661752	Sig. genes		small nuclear ribonucleoprotein N (SNRPN) pseudogene
ENSG00000269958	RP11-73M18.8	111.421	0.434478	0.125535	3.46101	0.000538153	0.009815	Sig. genes		novel transcript, sense intronic to KLC1
ENSG00000270069	MIR222HG	23.0873	1.27302	0.239677	5.3114	1.08785e-07	7.52257e-06	Sig. genes
ENSG00000270112	ST8SIA5-DT	16.5448	-1.50619	0.349226	-4.31295	1.61093e-05	0.000574737	Sig. genes		ST8SIA5 divergent transcript [Source:HGNC Symbol;Acc:HGNC:55267]
ENSG00000270562	RP11-154H23.3	13.1486	1.88781	0.512029	3.68692	0.000226987	0.00511569	Sig. genes		novel transcript
ENSG00000270800	RPS10-NUDT3	1172.11	0.465344	0.158793	2.9305	0.00338413	0.0399801	Sig. genes		RPS10-NUDT3 readthrough [Source:HGNC Symbol;Acc:HGNC:49181]
ENSG00000271216	LINC01050	7.86066	2.10182	0.573526	3.66473	0.000247595	0.00548137	Sig. genes		long intergenic non-protein coding RNA 1050 [Source:HGNC Symbol;Acc:HGNC:49044]
ENSG00000271303	SRXN1	338.184	0.651192	0.109435	5.95048	2.67355e-09	2.8502e-07	Sig. genes		sulfiredoxin 1 [Source:HGNC Symbol;Acc:HGNC:16132]
ENSG00000271447	MMP28	10.3515	-1.7413	0.556305	-3.13011	0.00174739	0.0247985	Sig. genes		matrix metallopeptidase 28 [Source:HGNC Symbol;Acc:HGNC:14366]
ENSG00000272153	RP1-286D6.5	6.2167	-1.86652	0.503431	-3.70759	0.000209238	0.00479828	Sig. genes		novel transcript, antisense to LRRC47
ENSG00000272168	CASC15	41.0788	1.37213	0.400781	3.42363	0.000617904	0.0109571	Sig. genes
ENSG00000272325	NUDT3	1355.63	-0.278561	0.0609657	-4.56914	4.89726e-06	0.000202563	Sig. genes		nudix hydrolase 3 [Source:HGNC Symbol;Acc:HGNC:8050]
ENSG00000272411	RP11-44B19.1	11.0398	-1.57301	0.424913	-3.70197	0.000213936	0.0048748	Sig. genes		novel transcript, antisense to SH3TC2
ENSG00000272695	GAS6-DT	14.524	2.17247	0.416216	5.21958	1.79333e-07	1.15534e-05	Sig. genes		GAS6 divergent transcript [Source:HGNC Symbol;Acc:HGNC:43694]
ENSG00000272777	RP11-571L19.8	6.19857	2.2941	0.749954	3.05898	0.0022209	0.0295077	Sig. genes		novel transcript
ENSG00000272870	SAP30-DT	30.0893	-0.681701	0.207401	-3.28687	0.00101308	0.0160426	Sig. genes
ENSG00000272990	RP11-305K5.1	101.593	0.497789	0.158846	3.13379	0.00172563	0.0245393	Sig. genes		novel transcript, antisense to KCNAB1
ENSG00000273045	C2orf15	25.7772	-0.838267	0.269196	-3.11397	0.0018459	0.0257484	Sig. genes		chromosome 2 open reading frame 15 [Source:HGNC Symbol;Acc:HGNC:28436]
ENSG00000273079	GRIN2B	175.512	-0.964045	0.332468	-2.89966	0.00373564	0.0430813	Sig. genes		glutamate ionotropic receptor NMDA type subunit 2B [Source:HGNC Symbol;Acc:HGNC:4586]
ENSG00000273143	DUSP5-DT	83.2262	3.32923	1.00265	3.32044	0.000898757	0.0146467	Sig. genes		DUSP5 divergent transcript [Source:HGNC Symbol;Acc:HGNC:55154]
ENSG00000274180	NATD1	97.9359	-0.690542	0.137283	-5.03007	4.9029e-07	2.8235e-05	Sig. genes		N-acetyltransferase domain containing 1 [Source:HGNC Symbol;Acc:HGNC:30770]
ENSG00000275097	RP11-627K11.6	95.7138	0.496846	0.168751	2.94425	0.00323735	0.0385976	Sig. genes		novel transcript, overlapping 3'UTR of FAM60A
ENSG00000275549	STPG3-AS1	6.23624	-1.9918	0.587843	-3.38832	0.000703219	0.012157	Sig. genes		STPG3 antisense RNA 1 [Source:HGNC Symbol;Acc:HGNC:51176]
ENSG00000275993	SIK1B	8.17529	-2.88543	0.905084	-3.18803	0.00143247	0.0211854	Sig. genes		novel protein, similar to salt-inducible kinase 1 SIK1
ENSG00000276107	THBS1-IT1	106.483	0.992881	0.178531	5.56138	2.67651e-08	2.15929e-06	Sig. genes		THBS1 intronic transcript 1 [Source:HGNC Symbol;Acc:HGNC:55225]
ENSG00000276529	AP001505.10	59.5856	0.572159	0.193918	2.95052	0.00317242	0.0380308	Sig. genes		novel transcript
ENSG00000276728	AC142472.6	31.837	-0.542411	0.182479	-2.97246	0.00295426	0.0361659	Sig. genes		novel transcript
ENSG00000276850	CH17-360D5.2	15.9019	2.44835	0.815529	3.00216	0.00268071	0.0339304	Sig. genes		novel transcript
ENSG00000277053	GTF2IP1	563.533	-0.282321	0.0891282	-3.16759	0.00153709	0.0223451	Sig. genes		general transcription factor IIi pseudogene 1 [Source:HGNC Symbol;Acc:HGNC:4660]
ENSG00000277287	RP4-794I6.4	234.592	-1.09055	0.174975	-6.23262	4.58709e-10	5.8682e-08	Sig. genes		novel transcript
ENSG00000278291	RP11-172H24.4	31.9117	1.55283	0.27064	5.73763	9.60106e-09	8.64096e-07	Sig. genes		novel transcript, antisense to IL17D
ENSG00000278891	RP11-246E12.2	29.0621	-1.03156	0.232493	-4.43696	9.12383e-06	0.000357566	Sig. genes		TEC
ENSG00000279407	AC007191.4	29.3385	0.640787	0.22546	2.84213	0.00448137	0.0490895	Sig. genes		TEC
ENSG00000280143	AP000892.6	54.6539	1.50156	0.454612	3.30296	0.000956715	0.01534	Sig. genes		novel transcript
ENSG00000280219	RP11-752L20.3	25.3517	-0.99591	0.300965	-3.30905	0.000936116	0.015118	Sig. genes		TEC
ENSG00000280241	RP11-290O12.2	3.99058	2.94474	0.821742	3.58353	0.000338979	0.00693049	Sig. genes		novel transcript, antisense to DCHS2
ENSG00000282057	RP4-621F18.2	67.3678	1.50749	0.293327	5.1393	2.75771e-07	1.69146e-05	Sig. genes		novel transcript
ENSG00000283154	IQCJ-SCHIP1	93.4347	0.570014	0.167764	3.39771	0.000679527	0.0117929	Sig. genes
ENSG00000283247	CCDC201	5.13057	-2.69582	0.758835	-3.55257	0.000381487	0.00760184	Sig. genes		coiled-coil domain containing 201 [Source:HGNC Symbol;Acc:HGNC:54081]
ENSG00000284691	RP11-511P7.5	15.2648	-0.790469	0.278184	-2.84154	0.00448969	0.0491506	Sig. genes		novel zinc finger protein
ENSG00000284969	RP4-541C22.8	32.7803	2.03471	0.702076	2.89813	0.0037539	0.0431947	Sig. genes		novel protein
ENSG00000285106	RP11-36B6.2	85.2276	1.41758	0.252834	5.60675	2.06159e-08	1.72576e-06	Sig. genes		novel transcript
ENSG00000285437	POLR2J3	318.067	-0.322569	0.0924561	-3.48889	0.000485038	0.00911546	Sig. genes
ENSG00000285508	RP5-931K24.3	61.6893	0.569244	0.146455	3.88681	0.000101571	0.00267609	Sig. genes		MKKS centrosomal shuttling protein [Source:NCBI gene (formerly Entrezgene);Acc:8195]
ENSG00000285852	RP11-188P8.4	9.67018	-1.56166	0.533825	-2.92542	0.00343992	0.040479	Sig. genes		novel transcript
ENSG00000286615	CTB-88F18.6	6.27809	-1.97826	0.630323	-3.13848	0.00169825	0.024197	Sig. genes
ENSG00000286707	RP11-499P9.1	28.8044	-0.63461	0.215895	-2.93944	0.00328811	0.0390259	Sig. genes		novel transcript
ENSG00000286828	CTD-2215E18.4	14.6331	-0.970035	0.292198	-3.31979	0.00090086	0.0146676	Sig. genes		novel transcript
ENSG00000287126	RP13-512J5.2	30.429	-0.748936	0.182116	-4.11241	3.91551e-05	0.00125226	Sig. genes		novel transcript
ENSG00000287929	RP11-548N1.2	84.4092	1.13077	0.258723	4.37058	1.23915e-05	0.000458538	Sig. genes		novel transcript, antisense to NMNAT2
ENSG00000288656	RP11-666O2.7	3932.01	0.343158	0.102437	3.34993	0.00080832	0.0135553	Sig. genes		novel protein

## Sheet: endothelial FBS vs hPL
gene_id	gene_name	baseMean	log2FoldChange	lfcSE	stat	pvalue	padj	sig	highlight	description
ENSG00000000003	TSPAN6	2150.25	-1.02939	0.129609	-7.9423	1.98468e-15	7.10912e-13	Sig. genes		tetraspanin 6 [Source:HGNC Symbol;Acc:HGNC:11858]
ENSG00000000419	DPM1	84.5447	0.106559	0.136764	0.779142	0.435896	0.745242	Non-sig.		dolichyl-phosphate mannosyltransferase subunit 1, catalytic [Source:HGNC Symbol;Acc:HGNC:3005]
ENSG00000000457	SCYL3	96.2587	-0.0275321	0.117807	-0.233704	0.815215	0.936886	Non-sig.		SCY1 like pseudokinase 3 [Source:HGNC Symbol;Acc:HGNC:19285]
ENSG00000000460	C1orf112	10.9368	-0.525309	0.513195	-1.02361	0.306022	0.638421	Non-sig.		chromosome 1 open reading frame 112 [Source:HGNC Symbol;Acc:HGNC:25565]
ENSG00000000938	FGR	3.90178	0.794663	1.01723	0.781206	0.434682	0.744291	Non-sig.		FGR proto-oncogene, Src family tyrosine kinase [Source:HGNC Symbol;Acc:HGNC:3697]
ENSG00000000971	CFH	568.182	-0.256358	0.140497	-1.82465	0.068054	0.294132	Non-sig.
ENSG00000001036	FUCA2	155.657	0.222152	0.141609	1.56877	0.116702	0.397346	Non-sig.		alpha-L-fucosidase 2 [Source:HGNC Symbol;Acc:HGNC:4008]
ENSG00000001084	GCLC	106.078	0.0143978	0.128559	0.111994	0.910828	0.972803	Non-sig.		glutamate-cysteine ligase catalytic subunit [Source:HGNC Symbol;Acc:HGNC:4311]
ENSG00000001167	NFYA	43.0457	0.0671772	0.168897	0.39774	0.690822	0.884767	Non-sig.		nuclear transcription factor Y subunit alpha [Source:HGNC Symbol;Acc:HGNC:7804]
ENSG00000001460	STPG1	19.442	-0.50936	0.426685	-1.19376	0.232572	0.559631	Non-sig.		sperm tail PG-rich repeat containing 1 [Source:HGNC Symbol;Acc:HGNC:28070]
ENSG00000001461	NIPAL3	350.464	-0.227266	0.0959723	-2.36803	0.0178829	0.129833	Non-sig.		NIPA like domain containing 3 [Source:HGNC Symbol;Acc:HGNC:25233]
ENSG00000001497	LAS1L	114.989	0.0300675	0.135304	0.222221	0.824142	0.940931	Non-sig.		LAS1 like ribosome biogenesis factor [Source:HGNC Symbol;Acc:HGNC:25726]
ENSG00000001561	ENPP4	92.0227	0.112536	0.16114	0.698374	0.484943	0.779373	Non-sig.		ectonucleotide pyrophosphatase/phosphodiesterase 4 [Source:HGNC Symbol;Acc:HGNC:3359]
ENSG00000001617	SEMA3F	34.9589	-0.452268	0.306185	-1.47711	0.139647	0.434216	Non-sig.		semaphorin 3F [Source:HGNC Symbol;Acc:HGNC:10728]
ENSG00000001629	ANKIB1	332.422	-0.171265	0.181928	-0.941385	0.346507	0.675748	Non-sig.		ankyrin repeat and IBR domain containing 1 [Source:HGNC Symbol;Acc:HGNC:22215]
ENSG00000001630	CYP51A1	318.594	0.0305432	0.107273	0.284724	0.775856	0.922988	Non-sig.
ENSG00000001631	KRIT1	346.929	-0.133038	0.0929211	-1.43173	0.152221	0.456339	Non-sig.
ENSG00000002016	RAD52	36.4448	-0.275517	0.286106	-0.962992	0.335552	0.664516	Non-sig.		RAD52 homolog, DNA repair protein [Source:HGNC Symbol;Acc:HGNC:9824]
ENSG00000002330	BAD	200.44	0.0131477	0.108488	0.121191	0.90354	0.969412	Non-sig.		BCL2 associated agonist of cell death [Source:HGNC Symbol;Acc:HGNC:936]
ENSG00000002549	LAP3	155.064	-0.114456	0.157223	-0.727986	0.466622	0.766693	Non-sig.		leucine aminopeptidase 3 [Source:HGNC Symbol;Acc:HGNC:18449]
ENSG00000002586	CD99	414.902	0.178716	0.0865682	2.06445	0.0389749	0.210888	Non-sig.		CD99 molecule (Xg blood group) [Source:HGNC Symbol;Acc:HGNC:7082]
ENSG00000002587	HS3ST1	21.1868	-0.238034	0.47899	-0.49695	0.619224	0.852594	Non-sig.		heparan sulfate-glucosamine 3-sulfotransferase 1 [Source:HGNC Symbol;Acc:HGNC:5194]
ENSG00000002746	HECW1	3.87946	1.86618	1.61108	1.15834	0.246725	0.574025	Non-sig.		HECT, C2 and WW domain containing E3 ubiquitin protein ligase 1 [Source:HGNC Symbol;Acc:HGNC:22195]
ENSG00000002822	MAD1L1	41.0818	-0.328184	0.218018	-1.50531	0.132245	0.424036	Non-sig.		mitotic arrest deficient 1 like 1 [Source:HGNC Symbol;Acc:HGNC:6762]
ENSG00000002834	LASP1	274.716	0.0601153	0.0943913	0.636874	0.524207	0.804213	Non-sig.		LIM and SH3 protein 1 [Source:HGNC Symbol;Acc:HGNC:6513]
ENSG00000002919	SNX11	72.1688	0.00492761	0.161415	0.0305276	0.975646	0.993806	Non-sig.		sorting nexin 11 [Source:HGNC Symbol;Acc:HGNC:14975]
ENSG00000002933	TMEM176A	125.532	-0.0968964	0.205346	-0.471868	0.637021	0.861775	Non-sig.		transmembrane protein 176A [Source:HGNC Symbol;Acc:HGNC:24930]
ENSG00000003056	M6PR	261.031	0.0547716	0.0981598	0.557984	0.576855	0.832378	Non-sig.		mannose-6-phosphate receptor, cation dependent [Source:HGNC Symbol;Acc:HGNC:6752]
ENSG00000003096	KLHL13	35.4054	0.544172	0.334982	1.62448	0.104274	0.373383	Non-sig.		kelch like family member 13 [Source:HGNC Symbol;Acc:HGNC:22931]
ENSG00000003137	CYP26B1	11.0976	0.105817	0.468473	0.225876	0.821298	0.939721	Non-sig.		cytochrome P450 family 26 subfamily B member 1 [Source:HGNC Symbol;Acc:HGNC:20581]
ENSG00000003147	ICA1	13.4859	0.39555	0.40993	0.964921	0.334584	0.663951	Non-sig.		islet cell autoantigen 1 [Source:HGNC Symbol;Acc:HGNC:5343]
ENSG00000003249	DBNDD1	91.618	-0.30735	0.140069	-2.19428	0.0282153	0.172352	Non-sig.		dysbindin domain containing 1 [Source:HGNC Symbol;Acc:HGNC:28455]
ENSG00000003393	ALS2	130.487	-0.0879196	0.188563	-0.466261	0.641029	0.863752	Non-sig.		alsin Rho guanine nucleotide exchange factor ALS2 [Source:HGNC Symbol;Acc:HGNC:443]
ENSG00000003400	CASP10	34.7673	0.62805	0.368524	1.70423	0.0883375	0.341049	Non-sig.
ENSG00000003402	CFLAR	629.84	-0.22701	0.110223	-2.05955	0.039442	0.212645	Non-sig.
ENSG00000003436	TFPI	103.226	0.509516	0.242533	2.10081	0.0356575	0.199696	Non-sig.		tissue factor pathway inhibitor [Source:HGNC Symbol;Acc:HGNC:11760]
ENSG00000003509	NDUFAF7	62.441	-0.0136296	0.173194	-0.0786957	0.937275	0.980737	Non-sig.		NADH:ubiquinone oxidoreductase complex assembly factor 7 [Source:HGNC Symbol;Acc:HGNC:28816]
ENSG00000003756	RBM5	416.012	-0.182787	0.181023	-1.00975	0.312616	0.644224	Non-sig.		RNA binding motif protein 5 [Source:HGNC Symbol;Acc:HGNC:9902]
ENSG00000003989	SLC7A2	14.2524	0.609296	0.368008	1.65566	0.0977909	0.359269	Non-sig.		solute carrier family 7 member 2 [Source:HGNC Symbol;Acc:HGNC:11060]
ENSG00000004139	SARM1	34.959	0.0138026	0.235427	0.0586279	0.953248	0.987088	Non-sig.		sterile alpha and TIR motif containing 1 [Source:HGNC Symbol;Acc:HGNC:17074]
ENSG00000004142	POLDIP2	263.922	0.0445736	0.0934113	0.477176	0.633237	0.859929	Non-sig.		DNA polymerase delta interacting protein 2 [Source:HGNC Symbol;Acc:HGNC:23781]
ENSG00000004399	PLXND1	193.834	0.248472	0.157942	1.57319	0.115674	0.395444	Non-sig.		plexin D1 [Source:HGNC Symbol;Acc:HGNC:9107]
ENSG00000004455	AK2	321.663	-0.0069091	0.0925476	-0.0746545	0.94049	0.982224	Non-sig.
ENSG00000004468	CD38	3.59977	-1.73777	0.903663	-1.92303	0.0544759	0.257363	Non-sig.		CD38 molecule [Source:HGNC Symbol;Acc:HGNC:1667]
ENSG00000004478	FKBP4	284.897	-0.204418	0.285526	-0.715935	0.474032	0.772653	Non-sig.		FKBP prolyl isomerase 4 [Source:HGNC Symbol;Acc:HGNC:3720]
ENSG00000004487	KDM1A	89.5433	0.110773	0.124372	0.89066	0.373112	0.697613	Non-sig.
ENSG00000004534	RBM6	306.326	0.175359	0.129569	1.3534	0.175929	0.488207	Non-sig.		RNA binding motif protein 6 [Source:HGNC Symbol;Acc:HGNC:9903]
ENSG00000004660	CAMKK1	26.177	0.271856	0.386793	0.702845	0.482153	0.7781	Non-sig.		calcium/calmodulin dependent protein kinase kinase 1 [Source:HGNC Symbol;Acc:HGNC:1469]
ENSG00000004700	RECQL	161.934	-0.137063	0.151506	-0.904669	0.365641	0.690638	Non-sig.		RecQ like helicase [Source:HGNC Symbol;Acc:HGNC:9948]
ENSG00000004766	VPS50	69.0282	-0.125413	0.256906	-0.488166	0.625432	0.855488	Non-sig.		VPS50 subunit of EARP/GARPII complex [Source:HGNC Symbol;Acc:HGNC:25956]
ENSG00000004776	HSPB6	43.2381	0.244746	0.261876	0.934586	0.350002	0.678535	Non-sig.		heat shock protein family B (small) member 6 [Source:HGNC Symbol;Acc:HGNC:26511]
ENSG00000004777	ARHGAP33	8.43693	-0.238415	0.427407	-0.557816	0.57697	0.832409	Non-sig.
ENSG00000004779	NDUFAB1	600.181	-0.2145	0.0641621	-3.34309	0.000828514	0.0138421	Sig. genes		NADH:ubiquinone oxidoreductase subunit AB1 [Source:HGNC Symbol;Acc:HGNC:7694]
ENSG00000004799	PDK4	96.1377	0.303103	0.177873	1.70404	0.0883729	0.341112	Non-sig.		pyruvate dehydrogenase kinase 4 [Source:HGNC Symbol;Acc:HGNC:8812]
ENSG00000004838	ZMYND10	11.3695	-1.02518	0.428718	-2.39126	0.0167908	0.124266	Non-sig.		zinc finger MYND-type containing 10 [Source:HGNC Symbol;Acc:HGNC:19412]
ENSG00000004848	ARX	79.6108	-0.807847	0.302118	-2.67395	0.00749646	0.0705897	Non-sig.		aristaless related homeobox [Source:HGNC Symbol;Acc:HGNC:18060]
ENSG00000004864	SLC25A13	163.945	-0.130622	0.136483	-0.95706	0.338537	0.667143	Non-sig.		solute carrier family 25 member 13 [Source:HGNC Symbol;Acc:HGNC:10983]
ENSG00000004866	ST7	72.3883	0.298574	0.154805	1.92871	0.0537674	0.255431	Non-sig.		suppression of tumorigenicity 7 [Source:HGNC Symbol;Acc:HGNC:11351]
ENSG00000004897	CDC27	313.019	-0.0510649	0.0690162	-0.739897	0.459363	0.76271	Non-sig.		cell division cycle 27 [Source:HGNC Symbol;Acc:HGNC:1728]
ENSG00000004961	HCCS	144.563	-0.243082	0.129924	-1.87096	0.0613509	0.277126	Non-sig.		holocytochrome c synthase [Source:HGNC Symbol;Acc:HGNC:4837]
ENSG00000004975	DVL2	149.274	0.0469992	0.119971	0.391755	0.695239	0.887004	Non-sig.		dishevelled segment polarity protein 2 [Source:HGNC Symbol;Acc:HGNC:3086]
ENSG00000005001	PRSS22	11.9683	-0.424528	0.69475	-0.611051	0.541166	0.813456	Non-sig.		serine protease 22 [Source:HGNC Symbol;Acc:HGNC:14368]
ENSG00000005007	UPF1	422.591	-0.152028	0.0897841	-1.69326	0.0904066	0.345536	Non-sig.		UPF1 RNA helicase and ATPase [Source:HGNC Symbol;Acc:HGNC:9962]
ENSG00000005020	SKAP2	69.3476	0.0973659	0.268086	0.363189	0.716464	0.895535	Non-sig.		src kinase associated phosphoprotein 2 [Source:HGNC Symbol;Acc:HGNC:15687]
ENSG00000005022	SLC25A5	577.655	-0.128317	0.0952228	-1.34754	0.177806	0.491436	Non-sig.		solute carrier family 25 member 5 [Source:HGNC Symbol;Acc:HGNC:10991]
ENSG00000005059	MCUB	92.9246	0.349044	0.157755	2.21257	0.0269272	0.167105	Non-sig.		mitochondrial calcium uniporter dominant negative subunit beta [Source:HGNC Symbol;Acc:HGNC:26076]
ENSG00000005075	POLR2J	302.541	0.025151	0.0870421	0.288952	0.772618	0.9219	Non-sig.
ENSG00000005100	DHX33	156.214	0.0632319	0.122879	0.514586	0.606843	0.847172	Non-sig.		DEAH-box helicase 33 [Source:HGNC Symbol;Acc:HGNC:16718]
ENSG00000005108	THSD7A	40.6702	0.429437	0.354165	1.21253	0.225309	0.550694	Non-sig.
ENSG00000005156	LIG3	127.459	-0.204029	0.211338	-0.965417	0.334336	0.663912	Non-sig.		DNA ligase 3 [Source:HGNC Symbol;Acc:HGNC:6600]
ENSG00000005175	RPAP3	281.781	0.019697	0.0931579	0.211436	0.832547	0.943848	Non-sig.		RNA polymerase II associated protein 3 [Source:HGNC Symbol;Acc:HGNC:26151]
ENSG00000005187	ACSM3	6.65375	0.3786	0.647594	0.584626	0.558799	0.822696	Non-sig.		acyl-CoA synthetase medium chain family member 3 [Source:HGNC Symbol;Acc:HGNC:10522]
ENSG00000005189	REXO5	5.19435	0.766328	0.515676	1.48607	0.137262	0.430911	Non-sig.		RNA exonuclease 5 [Source:HGNC Symbol;Acc:HGNC:24661]
ENSG00000005194	CIAPIN1	114.873	0.135072	0.130312	1.03653	0.299957	0.631952	Non-sig.		cytokine induced apoptosis inhibitor 1 [Source:HGNC Symbol;Acc:HGNC:28050]
ENSG00000005206	SPPL2B	128.932	-0.239166	0.132331	-1.80734	0.0707095	0.300222	Non-sig.		signal peptide peptidase like 2B [Source:HGNC Symbol;Acc:HGNC:30627]
ENSG00000005238	FAM214B	68.7243	0.263963	0.200455	1.31682	0.1879	0.504389	Non-sig.		family with sequence similarity 214 member B [Source:HGNC Symbol;Acc:HGNC:25666]
ENSG00000005243	COPZ2	136.061	0.262051	0.154852	1.69227	0.0905937	0.34602	Non-sig.		COPI coat complex subunit zeta 2 [Source:HGNC Symbol;Acc:HGNC:19356]
ENSG00000005249	PRKAR2B	43.548	-0.451053	0.227919	-1.979	0.0478157	0.238128	Non-sig.		protein kinase cAMP-dependent type II regulatory subunit beta [Source:HGNC Symbol;Acc:HGNC:9392]
ENSG00000005302	MSL3	153.931	-0.0458063	0.127845	-0.358294	0.720123	0.897767	Non-sig.		MSL complex subunit 3 [Source:HGNC Symbol;Acc:HGNC:7370]
ENSG00000005339	CREBBP	601.768	-0.160779	0.0977786	-1.64431	0.100112	0.363913	Non-sig.		CREB binding protein [Source:HGNC Symbol;Acc:HGNC:2348]
ENSG00000005379	TSPOAP1	88.1477	0.0280094	0.138432	0.202333	0.839656	0.946158	Non-sig.		TSPO associated protein 1 [Source:HGNC Symbol;Acc:HGNC:16831]
ENSG00000005436	GCFC2	59.0075	-0.260759	0.239527	-1.08864	0.276313	0.607956	Non-sig.		GC-rich sequence DNA-binding factor 2 [Source:HGNC Symbol;Acc:HGNC:1317]
ENSG00000005448	WDR54	153.663	-0.384691	0.144088	-2.66983	0.00758889	0.0712334	Non-sig.		WD repeat domain 54 [Source:HGNC Symbol;Acc:HGNC:25770]
ENSG00000005469	CROT	94.595	-0.202014	0.225996	-0.893884	0.371384	0.695578	Non-sig.		carnitine O-octanoyltransferase [Source:HGNC Symbol;Acc:HGNC:2366]
ENSG00000005471	ABCB4	3.94275	-0.736916	0.787876	-0.93532	0.349623	0.6782	Non-sig.		ATP binding cassette subfamily B member 4 [Source:HGNC Symbol;Acc:HGNC:45]
ENSG00000005483	KMT2E	1293.53	-0.0688686	0.0542345	-1.26983	0.204146	0.524795	Non-sig.
ENSG00000005486	RHBDD2	412.203	-0.00315731	0.0930675	-0.0339249	0.972937	0.993474	Non-sig.		rhomboid domain containing 2 [Source:HGNC Symbol;Acc:HGNC:23082]
ENSG00000005513	SOX8	7.36038	0.571022	0.532196	1.07295	0.283292	0.616345	Non-sig.		SRY-box transcription factor 8 [Source:HGNC Symbol;Acc:HGNC:11203]
ENSG00000005700	IBTK	435.176	-0.0673917	0.0771275	-0.873769	0.382244	0.70452	Non-sig.		inhibitor of Bruton tyrosine kinase [Source:HGNC Symbol;Acc:HGNC:17853]
ENSG00000005801	ZNF195	83.1313	0.337634	0.159708	2.11407	0.0345095	0.195219	Non-sig.		zinc finger protein 195 [Source:HGNC Symbol;Acc:HGNC:12986]
ENSG00000005810	MYCBP2	1092.78	-0.446454	0.126759	-3.52206	0.000428207	0.00829999	Sig. genes
ENSG00000005812	FBXL3	97.1662	0.127861	0.241168	0.530174	0.595991	0.841881	Non-sig.		F-box and leucine rich repeat protein 3 [Source:HGNC Symbol;Acc:HGNC:13599]
ENSG00000005844	ITGAL	4.38162	0.443832	0.966888	0.459031	0.646212	0.866162	Non-sig.		integrin subunit alpha L [Source:HGNC Symbol;Acc:HGNC:6148]
ENSG00000005882	PDK2	67.6905	0.170489	0.160222	1.06408	0.287292	0.620153	Non-sig.		pyruvate dehydrogenase kinase 2 [Source:HGNC Symbol;Acc:HGNC:8810]
ENSG00000005884	ITGA3	1028.28	-0.0729179	0.0618562	-1.17883	0.238466	0.56651	Non-sig.		integrin subunit alpha 3 [Source:HGNC Symbol;Acc:HGNC:6139]
ENSG00000005889	ZFX	175.187	-0.0113122	0.155587	-0.0727067	0.94204	0.982224	Non-sig.		zinc finger protein X-linked [Source:HGNC Symbol;Acc:HGNC:12869]
ENSG00000005893	LAMP2	628.905	0.0142019	0.0871208	0.163014	0.870508	0.957573	Non-sig.		lysosomal associated membrane protein 2 [Source:HGNC Symbol;Acc:HGNC:6501]
ENSG00000005961	ITGA2B	4.11202	1.11201	0.67391	1.65009	0.0989251	0.361508	Non-sig.		integrin subunit alpha 2b [Source:HGNC Symbol;Acc:HGNC:6138]
ENSG00000006007	GDE1	717.65	-0.00709801	0.0574931	-0.123459	0.901744	0.968615	Non-sig.		glycerophosphodiester phosphodiesterase 1 [Source:HGNC Symbol;Acc:HGNC:29644]
ENSG00000006015	REX1BD	262.846	-0.172622	0.106103	-1.62693	0.103751	0.372154	Non-sig.		required for excision 1-B domain containing [Source:HGNC Symbol;Acc:HGNC:26098]
ENSG00000006016	CRLF1	260.959	-0.0839477	0.263808	-0.318215	0.750322	0.912305	Non-sig.		cytokine receptor like factor 1 [Source:HGNC Symbol;Acc:HGNC:2364]
ENSG00000006025	OSBPL7	40.7199	0.0536359	0.218787	0.245151	0.806339	0.933883	Non-sig.		oxysterol binding protein like 7 [Source:HGNC Symbol;Acc:HGNC:16387]
ENSG00000006042	TMEM98	428.844	0.244324	0.0826287	2.95689	0.00310755	0.0374538	Sig. genes		transmembrane protein 98 [Source:HGNC Symbol;Acc:HGNC:24529]
ENSG00000006062	MAP3K14	35.7402	-0.159369	0.247439	-0.644073	0.519528	0.8015	Non-sig.		mitogen-activated protein kinase kinase kinase 14 [Source:HGNC Symbol;Acc:HGNC:6853]
ENSG00000006118	TMEM132A	53.6689	0.430213	0.181713	2.36754	0.0179067	0.129833	Non-sig.		transmembrane protein 132A [Source:HGNC Symbol;Acc:HGNC:31092]
ENSG00000006125	AP2B1	886.24	0.098733	0.0686129	1.43899	0.150154	0.453044	Non-sig.		adaptor related protein complex 2 subunit beta 1 [Source:HGNC Symbol;Acc:HGNC:563]
ENSG00000006128	TAC1	277.395	-0.379935	0.196608	-1.93245	0.0533039	0.25431	Non-sig.		tachykinin precursor 1 [Source:HGNC Symbol;Acc:HGNC:11517]
ENSG00000006194	ZNF263	62.1166	0.484149	0.183511	2.63826	0.00833328	0.0761087	Non-sig.		zinc finger protein 263 [Source:HGNC Symbol;Acc:HGNC:13056]
ENSG00000006210	CX3CL1	48.9705	0.399286	0.253374	1.57587	0.115055	0.394426	Non-sig.		C-X3-C motif chemokine ligand 1 [Source:HGNC Symbol;Acc:HGNC:10647]
ENSG00000006282	SPATA20	181.936	-0.0239581	0.0945458	-0.253402	0.799958	0.931892	Non-sig.		spermatogenesis associated 20 [Source:HGNC Symbol;Acc:HGNC:26125]
ENSG00000006283	CACNA1G	5.27987	-1.20122	0.953968	-1.25919	0.207963	0.528832	Non-sig.		calcium voltage-gated channel subunit alpha1 G [Source:HGNC Symbol;Acc:HGNC:1394]
ENSG00000006327	TNFRSF12A	181.625	1.11784	0.154012	7.25813	3.92491e-13	9.0122e-11	Sig. genes		TNF receptor superfamily member 12A [Source:HGNC Symbol;Acc:HGNC:18152]
ENSG00000006432	MAP3K9	65.9831	0.169057	0.160467	1.05353	0.292097	0.62444	Non-sig.		mitogen-activated protein kinase kinase kinase 9 [Source:HGNC Symbol;Acc:HGNC:6861]
ENSG00000006451	RALA	643.197	0.526101	0.147437	3.5683	0.000359302	0.00724674	Sig. genes		RAS like proto-oncogene A [Source:HGNC Symbol;Acc:HGNC:9839]
ENSG00000006453	BAIAP2L1	56.4976	0.436296	0.218794	1.99409	0.0461422	0.232856	Non-sig.		BAR/IMD domain containing adaptor protein 2 like 1 [Source:HGNC Symbol;Acc:HGNC:21649]
ENSG00000006459	KDM7A	89.0097	0.471333	0.207512	2.27136	0.0231255	0.15061	Non-sig.		lysine demethylase 7A [Source:HGNC Symbol;Acc:HGNC:22224]
ENSG00000006468	ETV1	27.0073	-0.126754	0.268158	-0.472685	0.636438	0.861638	Non-sig.		ETS variant transcription factor 1 [Source:HGNC Symbol;Acc:HGNC:3490]
ENSG00000006530	AGK	34.0294	-0.0255856	0.297159	-0.0861006	0.931386	0.979031	Non-sig.		acylglycerol kinase [Source:HGNC Symbol;Acc:HGNC:21869]
ENSG00000006534	ALDH3B1	149.592	-0.47989	0.200936	-2.38827	0.0169277	0.125021	Non-sig.
ENSG00000006555	TTC22	23.8102	0.0129337	0.368433	0.0351046	0.971996	0.993265	Non-sig.		tetratricopeptide repeat domain 22 [Source:HGNC Symbol;Acc:HGNC:26067]
ENSG00000006576	PHTF2	151.092	0.1414	0.124289	1.13767	0.25526	0.583945	Non-sig.
ENSG00000006606	CCL26	43.9769	0.328652	0.325413	1.00995	0.312518	0.644096	Non-sig.		C-C motif chemokine ligand 26 [Source:HGNC Symbol;Acc:HGNC:10625]
ENSG00000006607	FARP2	64.3969	0.0567304	0.254062	0.223294	0.823307	0.940517	Non-sig.		FERM, ARH/RhoGEF and pleckstrin domain protein 2 [Source:HGNC Symbol;Acc:HGNC:16460]
ENSG00000006625	GGCT	142.699	-0.107639	0.115342	-0.933217	0.350708	0.679008	Non-sig.		gamma-glutamylcyclotransferase [Source:HGNC Symbol;Acc:HGNC:21705]
ENSG00000006634	DBF4	65.3626	-0.340498	0.218393	-1.5591	0.118972	0.401883	Non-sig.		DBF4 zinc finger [Source:HGNC Symbol;Acc:HGNC:17364]
ENSG00000006638	TBXA2R	7.53711	0.345571	0.446916	0.773234	0.439384	0.748002	Non-sig.		thromboxane A2 receptor [Source:HGNC Symbol;Acc:HGNC:11608]
ENSG00000006652	IFRD1	153.345	0.334555	0.131078	2.55234	0.0107003	0.0908224	Non-sig.		interferon related developmental regulator 1 [Source:HGNC Symbol;Acc:HGNC:5456]
ENSG00000006695	COX10	56.3023	0.33387	0.182079	1.83365	0.0667053	0.291815	Non-sig.		cytochrome c oxidase assembly factor heme A:farnesyltransferase COX10 [Source:HGNC Symbol;Acc:HGNC:2260]
ENSG00000006704	GTF2IRD1	242.916	0.109072	0.177112	0.615835	0.538003	0.812529	Non-sig.		GTF2I repeat domain containing 1 [Source:HGNC Symbol;Acc:HGNC:4661]
ENSG00000006712	PAF1	234.695	0.165333	0.31739	0.520914	0.602427	0.84542	Non-sig.		PAF1 homolog, Paf1/RNA polymerase II complex component [Source:HGNC Symbol;Acc:HGNC:25459]
ENSG00000006715	VPS41	975.623	-0.173171	0.155145	-1.11619	0.26434	0.594138	Non-sig.		VPS41 subunit of HOPS complex [Source:HGNC Symbol;Acc:HGNC:12713]
ENSG00000006740	ARHGAP44	27.9314	-0.267806	0.349359	-0.766563	0.443342	0.750807	Non-sig.
ENSG00000006744	ELAC2	198.776	-0.192441	0.085178	-2.25928	0.0238663	0.154201	Non-sig.		elaC ribonuclease Z 2 [Source:HGNC Symbol;Acc:HGNC:14198]
ENSG00000006747	SCIN	22.4994	0.436014	0.471046	0.92563	0.354638	0.682079	Non-sig.		scinderin [Source:HGNC Symbol;Acc:HGNC:21695]
ENSG00000006756	ARSD	297.204	-0.169929	0.130224	-1.3049	0.191927	0.508508	Non-sig.		arylsulfatase D [Source:HGNC Symbol;Acc:HGNC:717]
ENSG00000006757	PNPLA4	102.847	-0.20386	0.151777	-1.34316	0.179222	0.492852	Non-sig.		patatin like phospholipase domain containing 4 [Source:HGNC Symbol;Acc:HGNC:24887]
ENSG00000006831	ADIPOR2	245.809	-0.0035727	0.0902074	-0.0396054	0.968408	0.99206	Non-sig.		adiponectin receptor 2 [Source:HGNC Symbol;Acc:HGNC:24041]
ENSG00000006837	CDKL3	30.848	0.236169	0.351939	0.671049	0.502189	0.790239	Non-sig.		cyclin dependent kinase like 3 [Source:HGNC Symbol;Acc:HGNC:15483]
ENSG00000007047	MARK4	130.228	-0.179724	0.183276	-0.980622	0.326779	0.656553	Non-sig.
ENSG00000007080	CCDC124	52.6507	-0.15607	0.153293	-1.01811	0.308625	0.641157	Non-sig.		coiled-coil domain containing 124 [Source:HGNC Symbol;Acc:HGNC:25171]
ENSG00000007168	PAFAH1B1	344.268	-0.154152	0.192983	-0.798785	0.424415	0.735462	Non-sig.		platelet activating factor acetylhydrolase 1b regulatory subunit 1 [Source:HGNC Symbol;Acc:HGNC:8574]
ENSG00000007174	DNAH9	8.71313	-1.22735	0.645006	-1.90285	0.0570606	0.265305	Non-sig.		dynein axonemal heavy chain 9 [Source:HGNC Symbol;Acc:HGNC:2953]
ENSG00000007202	KIAA0100	231.179	-0.676493	0.227919	-2.96812	0.00299625	0.03663	Sig. genes		KIAA0100 [Source:HGNC Symbol;Acc:HGNC:28960]
ENSG00000007237	GAS7	85.84	0.351097	0.259007	1.35555	0.175243	0.487688	Non-sig.		growth arrest specific 7 [Source:HGNC Symbol;Acc:HGNC:4169]
ENSG00000007255	TRAPPC6A	136.693	-0.0541165	0.11852	-0.456604	0.647956	0.866921	Non-sig.		trafficking protein particle complex subunit 6A [Source:HGNC Symbol;Acc:HGNC:23069]
ENSG00000007312	CD79B	4.46053	0.6976	1.08718	0.641657	0.521096	0.802366	Non-sig.		CD79b molecule [Source:HGNC Symbol;Acc:HGNC:1699]
ENSG00000007341	ST7L	61.6187	-0.101434	0.18904	-0.536571	0.591564	0.840271	Non-sig.		suppression of tumorigenicity 7 like [Source:HGNC Symbol;Acc:HGNC:18441]
ENSG00000007372	PAX6	275.49	0.121932	0.548258	0.222399	0.824003	0.940833	Non-sig.
ENSG00000007376	RPUSD1	124.568	0.223087	0.139672	1.59722	0.110217	0.385344	Non-sig.		RNA pseudouridine synthase domain containing 1 [Source:HGNC Symbol;Acc:HGNC:14173]
ENSG00000007384	RHBDF1	186.942	-0.00072402	0.126279	-0.00573347	0.995425	0.998877	Non-sig.		rhomboid 5 homolog 1 [Source:HGNC Symbol;Acc:HGNC:20561]
ENSG00000007392	LUC7L	217.527	-0.0763881	0.116641	-0.6549	0.512532	0.796409	Non-sig.		LUC7 like [Source:HGNC Symbol;Acc:HGNC:6723]
ENSG00000007402	CACNA2D2	13.4069	-0.622258	0.360345	-1.72684	0.084196	0.332074	Non-sig.		calcium voltage-gated channel auxiliary subunit alpha2delta 2 [Source:HGNC Symbol;Acc:HGNC:1400]
ENSG00000007516	BAIAP3	27.8643	-1.17213	0.290273	-4.03803	5.39022e-05	0.00163072	Sig. genes		BAI1 associated protein 3 [Source:HGNC Symbol;Acc:HGNC:948]
ENSG00000007520	TSR3	486.347	0.142424	0.0869252	1.63846	0.101326	0.36654	Non-sig.		TSR3 ribosome maturation factor [Source:HGNC Symbol;Acc:HGNC:14175]
ENSG00000007541	PIGQ	89.0689	-0.14436	0.163918	-0.880684	0.378489	0.70209	Non-sig.		phosphatidylinositol glycan anchor biosynthesis class Q [Source:HGNC Symbol;Acc:HGNC:14135]
ENSG00000007545	CRAMP1	68.2111	-0.0236327	0.14639	-0.161437	0.871749	0.957748	Non-sig.		cramped chromatin regulator homolog 1 [Source:HGNC Symbol;Acc:HGNC:14122]
ENSG00000007866	TEAD3	80.3794	0.148186	0.170186	0.870728	0.383903	0.705705	Non-sig.		TEA domain transcription factor 3 [Source:HGNC Symbol;Acc:HGNC:11716]
ENSG00000007923	DNAJC11	133.93	-0.246537	0.146358	-1.68448	0.0920885	0.347889	Non-sig.
ENSG00000007933	FMO3	4.16172	1.89858	0.862419	2.20146	0.0277034	0.17027	Non-sig.		flavin containing dimethylaniline monoxygenase 3 [Source:HGNC Symbol;Acc:HGNC:3771]
ENSG00000007944	MYLIP	272.033	-0.755759	0.11451	-6.59991	4.11395e-11	6.29752e-09	Sig. genes		myosin regulatory light chain interacting protein [Source:HGNC Symbol;Acc:HGNC:21155]
ENSG00000007968	E2F2	6.3351	0.372587	0.682737	0.545725	0.585255	0.837287	Non-sig.		E2F transcription factor 2 [Source:HGNC Symbol;Acc:HGNC:3114]
ENSG00000008018	PSMB1	933.236	0.0233649	0.087758	0.266243	0.790052	0.928741	Non-sig.		proteasome 20S subunit beta 1 [Source:HGNC Symbol;Acc:HGNC:9537]
ENSG00000008056	SYN1	5.81193	0.162712	0.414119	0.392911	0.694385	0.886607	Non-sig.		synapsin I [Source:HGNC Symbol;Acc:HGNC:11494]
ENSG00000008083	JARID2	232.631	-0.180562	0.12237	-1.47554	0.140068	0.434995	Non-sig.		jumonji and AT-rich interaction domain containing 2 [Source:HGNC Symbol;Acc:HGNC:6196]
ENSG00000008086	CDKL5	54.8787	-0.0092142	0.280625	-0.0328346	0.973807	0.993514	Non-sig.		cyclin dependent kinase like 5 [Source:HGNC Symbol;Acc:HGNC:11411]
ENSG00000008128	CDK11A	246.237	-0.137425	0.0915078	-1.50178	0.133153	0.425474	Non-sig.		cyclin dependent kinase 11A [Source:HGNC Symbol;Acc:HGNC:1730]
ENSG00000008130	NADK	83.2711	0.0244528	0.150085	0.162926	0.870576	0.957573	Non-sig.		NAD kinase [Source:HGNC Symbol;Acc:HGNC:29831]
ENSG00000008196	TFAP2B	1862.48	-1.11867	0.146391	-7.64161	2.14528e-14	6.29867e-12	Sig. genes		transcription factor AP-2 beta [Source:HGNC Symbol;Acc:HGNC:11743]
ENSG00000008226	DLEC1	4.1225	0.181388	0.712609	0.254541	0.799077	0.931494	Non-sig.		DLEC1 cilia and flagella associated protein [Source:HGNC Symbol;Acc:HGNC:2899]
ENSG00000008256	CYTH3	265.393	-0.107775	0.121997	-0.883418	0.37701	0.701169	Non-sig.		cytohesin 3 [Source:HGNC Symbol;Acc:HGNC:9504]
ENSG00000008282	SYPL1	212.032	0.189426	0.112437	1.68473	0.0920411	0.347889	Non-sig.		synaptophysin like 1 [Source:HGNC Symbol;Acc:HGNC:11507]
ENSG00000008283	CYB561	287.839	-0.394959	0.0980197	-4.02939	5.59225e-05	0.00167839	Sig. genes		cytochrome b561 [Source:HGNC Symbol;Acc:HGNC:2571]
ENSG00000008294	SPAG9	635.337	-0.200454	0.0899737	-2.22792	0.025886	0.162616	Non-sig.
ENSG00000008300	CELSR3	16.9314	0.616031	0.305732	2.01494	0.0439111	0.225796	Non-sig.		cadherin EGF LAG seven-pass G-type receptor 3 [Source:HGNC Symbol;Acc:HGNC:3230]
ENSG00000008311	AASS	219.155	-0.422584	0.149103	-2.83419	0.00459425	0.0500201	Non-sig.		aminoadipate-semialdehyde synthase [Source:HGNC Symbol;Acc:HGNC:17366]
ENSG00000008323	PLEKHG6	4.11493	-0.225459	1.11655	-0.201925	0.839976	0.946388	Non-sig.		pleckstrin homology and RhoGEF domain containing G6 [Source:HGNC Symbol;Acc:HGNC:25562]
ENSG00000008324	SS18L2	177.158	-0.0320972	0.11584	-0.277082	0.781717	0.925044	Non-sig.		SS18 like 2 [Source:HGNC Symbol;Acc:HGNC:15593]
ENSG00000008382	MPND	27.4498	-0.284232	0.368087	-0.772187	0.440004	0.748098	Non-sig.		MPN domain containing [Source:HGNC Symbol;Acc:HGNC:25934]
ENSG00000008394	MGST1	30.3392	0.677283	0.355961	1.90269	0.0570809	0.265331	Non-sig.		microsomal glutathione S-transferase 1 [Source:HGNC Symbol;Acc:HGNC:7061]
ENSG00000008405	CRY1	126.697	0.166026	0.134639	1.23312	0.217529	0.540172	Non-sig.		cryptochrome circadian regulator 1 [Source:HGNC Symbol;Acc:HGNC:2384]
ENSG00000008441	NFIX	752.961	0.0171772	0.0931553	0.184393	0.853705	0.951986	Non-sig.
ENSG00000008513	ST3GAL1	246.687	0.301044	0.255148	1.17988	0.238048	0.56583	Non-sig.		ST3 beta-galactoside alpha-2,3-sialyltransferase 1 [Source:HGNC Symbol;Acc:HGNC:10862]
ENSG00000008517	IL32	15.7581	0.565159	0.337089	1.67659	0.0936229	0.350546	Non-sig.		interleukin 32 [Source:HGNC Symbol;Acc:HGNC:16830]
ENSG00000008710	PKD1	264.781	0.201374	0.140359	1.4347	0.151372	0.454858	Non-sig.		polycystin 1, transient receptor potential channel interacting [Source:HGNC Symbol;Acc:HGNC:9008]
ENSG00000008735	MAPK8IP2	14.5465	0.553837	0.362842	1.52639	0.126914	0.415619	Non-sig.		mitogen-activated protein kinase 8 interacting protein 2 [Source:HGNC Symbol;Acc:HGNC:6883]
ENSG00000008838	MED24	146.762	-0.21461	0.114922	-1.86745	0.0618394	0.278698	Non-sig.
ENSG00000008853	RHOBTB2	117.957	-0.176224	0.216085	-0.815531	0.414769	0.727354	Non-sig.
ENSG00000008869	HEATR5B	61.8179	-0.292897	0.313087	-0.935513	0.349524	0.678173	Non-sig.		HEAT repeat containing 5B [Source:HGNC Symbol;Acc:HGNC:29273]
ENSG00000008952	SEC62	1637.32	0.086134	0.0654831	1.31536	0.188388	0.504982	Non-sig.		SEC62 homolog, preprotein translocation factor [Source:HGNC Symbol;Acc:HGNC:11846]
ENSG00000008988	RPS20	10811.2	0.242658	0.060721	3.99628	6.43458e-05	0.00188614	Sig. genes		ribosomal protein S20 [Source:HGNC Symbol;Acc:HGNC:10405]
ENSG00000009307	CSDE1	2596.67	0.0919215	0.0624969	1.47082	0.141341	0.437431	Non-sig.
ENSG00000009335	UBE3C	408.256	-0.270041	0.118143	-2.28571	0.0222713	0.147411	Non-sig.		ubiquitin protein ligase E3C [Source:HGNC Symbol;Acc:HGNC:16803]
ENSG00000009413	REV3L	833.399	0.0651016	0.167245	0.389259	0.697084	0.887081	Non-sig.		REV3 like, DNA directed polymerase zeta catalytic subunit [Source:HGNC Symbol;Acc:HGNC:9968]
ENSG00000009694	TENM1	21.1619	-1.24705	0.406305	-3.06926	0.00214592	0.028746	Sig. genes		teneurin transmembrane protein 1 [Source:HGNC Symbol;Acc:HGNC:8117]
ENSG00000009780	FAM76A	132.626	-0.0193942	0.200475	-0.0967414	0.922932	0.976356	Non-sig.		family with sequence similarity 76 member A [Source:HGNC Symbol;Acc:HGNC:28530]
ENSG00000009790	TRAF3IP3	7.55729	-0.583797	0.88051	-0.663022	0.507317	0.793237	Non-sig.		TRAF3 interacting protein 3 [Source:HGNC Symbol;Acc:HGNC:30766]
ENSG00000009830	POMT2	101.978	0.192621	0.183211	1.05136	0.293093	0.625193	Non-sig.		protein O-mannosyltransferase 2 [Source:HGNC Symbol;Acc:HGNC:19743]
ENSG00000009844	VTA1	135.66	-0.0379358	0.122512	-0.309649	0.756828	0.914443	Non-sig.		vesicle trafficking 1 [Source:HGNC Symbol;Acc:HGNC:20954]
ENSG00000009950	MLXIPL	26.7079	0.434838	0.41638	1.04433	0.296332	0.628307	Non-sig.		MLX interacting protein like [Source:HGNC Symbol;Acc:HGNC:12744]
ENSG00000009954	BAZ1B	573.783	-0.0520605	0.0754864	-0.689667	0.490404	0.78281	Non-sig.		bromodomain adjacent to zinc finger domain 1B [Source:HGNC Symbol;Acc:HGNC:961]
ENSG00000010017	RANBP9	109.265	-0.141129	0.151637	-0.930706	0.352006	0.679521	Non-sig.		RAN binding protein 9 [Source:HGNC Symbol;Acc:HGNC:13727]
ENSG00000010030	ETV7	4.22916	-0.845027	0.624663	-1.35277	0.176128	0.488554	Non-sig.		ETS variant transcription factor 7 [Source:HGNC Symbol;Acc:HGNC:18160]
ENSG00000010072	SPRTN	69.587	0.17849	0.228466	0.781254	0.434653	0.744291	Non-sig.		SprT-like N-terminal domain [Source:HGNC Symbol;Acc:HGNC:25356]
ENSG00000010165	EEF1AKNMT	111.549	-0.0361827	0.129463	-0.279482	0.779875	0.924921	Non-sig.		methyltransferase 13, eEF1A lysine and N-terminal methyltransferase [Source:HGNC Symbol;Acc:HGNC:24248]
ENSG00000010219	DYRK4	111.039	-0.263502	0.179037	-1.47177	0.141082	0.437038	Non-sig.
ENSG00000010244	ZNF207	654.524	-0.0693348	0.126248	-0.549195	0.582872	0.835444	Non-sig.		zinc finger protein 207 [Source:HGNC Symbol;Acc:HGNC:12998]
ENSG00000010256	UQCRC1	294.157	-0.132051	0.104115	-1.26831	0.204686	0.525355	Non-sig.		ubiquinol-cytochrome c reductase core protein 1 [Source:HGNC Symbol;Acc:HGNC:12585]
ENSG00000010270	STARD3NL	83.4029	0.290868	0.127023	2.28988	0.022028	0.146608	Non-sig.		STARD3 N-terminal like [Source:HGNC Symbol;Acc:HGNC:19169]
ENSG00000010278	CD9	129.717	0.473052	0.381998	1.23836	0.215581	0.538034	Non-sig.		CD9 molecule [Source:HGNC Symbol;Acc:HGNC:1709]
ENSG00000010292	NCAPD2	132.961	-0.103348	0.179643	-0.575296	0.565091	0.825863	Non-sig.		non-SMC condensin I complex subunit D2 [Source:HGNC Symbol;Acc:HGNC:24305]
ENSG00000010295	IFFO1	83.9357	-0.305769	0.141311	-2.1638	0.0304794	0.180937	Non-sig.		intermediate filament family orphan 1 [Source:HGNC Symbol;Acc:HGNC:24970]
ENSG00000010310	GIPR	5.21007	-0.778178	0.63432	-1.22679	0.219901	0.543724	Non-sig.		gastric inhibitory polypeptide receptor [Source:HGNC Symbol;Acc:HGNC:4271]
ENSG00000010318	PHF7	87.0505	-0.120879	0.150442	-0.803493	0.42169	0.733106	Non-sig.
ENSG00000010322	NISCH	337.57	-0.186164	0.066711	-2.7906	0.00526099	0.0553907	Non-sig.		nischarin [Source:HGNC Symbol;Acc:HGNC:18006]
ENSG00000010327	STAB1	21.3918	0.290591	0.295438	0.983594	0.325315	0.655019	Non-sig.		stabilin 1 [Source:HGNC Symbol;Acc:HGNC:18628]
ENSG00000010361	FUZ	47.8884	-0.605238	0.208417	-2.90398	0.00368456	0.0425745	Sig. genes		fuzzy planar cell polarity protein [Source:HGNC Symbol;Acc:HGNC:26219]
ENSG00000010404	IDS	1175.1	0.315437	0.0776349	4.06308	4.84301e-05	0.00150066	Sig. genes		iduronate 2-sulfatase [Source:HGNC Symbol;Acc:HGNC:5389]
ENSG00000010438	PRSS3	8.04828	0.746543	0.456337	1.63594	0.101851	0.367774	Non-sig.		serine protease 3 [Source:HGNC Symbol;Acc:HGNC:9486]
ENSG00000010539	ZNF200	50.7042	-0.136498	0.169415	-0.8057	0.420416	0.731957	Non-sig.		zinc finger protein 200 [Source:HGNC Symbol;Acc:HGNC:12993]
ENSG00000010626	LRRC23	101.565	-0.41416	0.153573	-2.69683	0.00700038	0.0675157	Non-sig.		leucine rich repeat containing 23 [Source:HGNC Symbol;Acc:HGNC:19138]
ENSG00000010704	HFE	16.8822	-0.315896	0.306988	-1.02902	0.303472	0.635581	Non-sig.		homeostatic iron regulator [Source:HGNC Symbol;Acc:HGNC:4886]
ENSG00000010803	SCMH1	97.8975	0.212794	0.143249	1.48548	0.137416	0.43092	Non-sig.
ENSG00000010810	FYN	105.31	0.0527104	0.280843	0.187686	0.851123	0.950705	Non-sig.		FYN proto-oncogene, Src family tyrosine kinase [Source:HGNC Symbol;Acc:HGNC:4037]
ENSG00000010818	HIVEP2	157.23	0.0206481	0.104501	0.197586	0.843369	0.947552	Non-sig.		HIVEP zinc finger 2 [Source:HGNC Symbol;Acc:HGNC:4921]
ENSG00000010932	FMO1	36.2257	0.638281	0.574253	1.1115	0.266354	0.596259	Non-sig.		flavin containing dimethylaniline monoxygenase 1 [Source:HGNC Symbol;Acc:HGNC:3769]
ENSG00000011007	ELOA	178.115	0.0157476	0.112676	0.13976	0.88885	0.962882	Non-sig.
ENSG00000011009	LYPLA2	165.348	-0.131078	0.106432	-1.23157	0.21811	0.541071	Non-sig.		lysophospholipase 2 [Source:HGNC Symbol;Acc:HGNC:6738]
ENSG00000011021	CLCN6	70.7035	0.0212831	0.216193	0.0984449	0.921579	0.975898	Non-sig.		chloride voltage-gated channel 6 [Source:HGNC Symbol;Acc:HGNC:2024]
ENSG00000011028	MRC2	800.963	0.688417	0.112286	6.13093	8.73666e-10	1.02943e-07	Sig. genes		mannose receptor C type 2 [Source:HGNC Symbol;Acc:HGNC:16875]
ENSG00000011105	TSPAN9	291.867	0.156215	0.103351	1.51151	0.13066	0.421187	Non-sig.		tetraspanin 9 [Source:HGNC Symbol;Acc:HGNC:21640]
ENSG00000011114	BTBD7	425.655	0.173297	0.122228	1.41781	0.156245	0.46208	Non-sig.		BTB domain containing 7 [Source:HGNC Symbol;Acc:HGNC:18269]
ENSG00000011132	APBA3	42.1417	0.0974768	0.194421	0.501371	0.61611	0.85189	Non-sig.		amyloid beta precursor protein binding family A member 3 [Source:HGNC Symbol;Acc:HGNC:580]
ENSG00000011143	MKS1	59.6595	-0.140977	0.18207	-0.774302	0.438752	0.747674	Non-sig.		MKS transition zone complex subunit 1 [Source:HGNC Symbol;Acc:HGNC:7121]
ENSG00000011198	ABHD5	174.641	0.326932	0.162188	2.01577	0.0438243	0.225601	Non-sig.		abhydrolase domain containing 5, lysophosphatidic acid acyltransferase [Source:HGNC Symbol;Acc:HGNC:21396]
ENSG00000011243	AKAP8L	167.315	-0.191799	0.117619	-1.63067	0.102959	0.370281	Non-sig.		A-kinase anchoring protein 8 like [Source:HGNC Symbol;Acc:HGNC:29857]
ENSG00000011258	MBTD1	45.5159	0.643419	0.262501	2.45111	0.0142416	0.110658	Non-sig.		mbt domain containing 1 [Source:HGNC Symbol;Acc:HGNC:19866]
ENSG00000011260	UTP18	164.048	-0.115782	0.108554	-1.06658	0.28616	0.619064	Non-sig.		UTP18 small subunit processome component [Source:HGNC Symbol;Acc:HGNC:24274]
ENSG00000011275	RNF216	540.55	0.0336972	0.159233	0.211622	0.832402	0.943782	Non-sig.		ring finger protein 216 [Source:HGNC Symbol;Acc:HGNC:21698]
ENSG00000011295	TTC19	294.912	-0.309961	0.0954001	-3.24907	0.00115785	0.0178818	Sig. genes		tetratricopeptide repeat domain 19 [Source:HGNC Symbol;Acc:HGNC:26006]
ENSG00000011304	PTBP1	765.781	0.103851	0.0598745	1.73448	0.0828322	0.328846	Non-sig.		polypyrimidine tract binding protein 1 [Source:HGNC Symbol;Acc:HGNC:9583]
ENSG00000011347	SYT7	6.44594	-0.657836	0.654011	-1.00585	0.314488	0.64535	Non-sig.		synaptotagmin 7 [Source:HGNC Symbol;Acc:HGNC:11514]
ENSG00000011376	LARS2	73	-0.0470877	0.171612	-0.274385	0.783789	0.925631	Non-sig.		leucyl-tRNA synthetase 2, mitochondrial [Source:HGNC Symbol;Acc:HGNC:17095]
ENSG00000011405	PIK3C2A	601.331	0.0982781	0.160227	0.613367	0.539633	0.812908	Non-sig.
ENSG00000011422	PLAUR	196.872	0.313323	0.156377	2.00364	0.0451086	0.229125	Non-sig.		plasminogen activator, urokinase receptor [Source:HGNC Symbol;Acc:HGNC:9053]
ENSG00000011426	ANLN	22.7925	1.61016	0.564612	2.8518	0.00434722	0.0480906	Sig. genes		anillin actin binding protein [Source:HGNC Symbol;Acc:HGNC:14082]
ENSG00000011451	WIZ	160.627	0.284456	0.115722	2.45809	0.0139678	0.109121	Non-sig.		WIZ zinc finger [Source:HGNC Symbol;Acc:HGNC:30917]
ENSG00000011454	RABGAP1	937.733	0.0976264	0.120146	0.812567	0.416466	0.728836	Non-sig.		RAB GTPase activating protein 1 [Source:HGNC Symbol;Acc:HGNC:17155]
ENSG00000011465	DCN	3378.1	0.392345	0.187539	2.09207	0.0364323	0.202201	Non-sig.		decorin [Source:HGNC Symbol;Acc:HGNC:2705]
ENSG00000011485	PPP5C	43.7551	0.20021	0.192567	1.03969	0.298483	0.630776	Non-sig.		protein phosphatase 5 catalytic subunit [Source:HGNC Symbol;Acc:HGNC:9322]
ENSG00000011523	CEP68	103.21	-0.20883	0.137097	-1.52323	0.127702	0.416905	Non-sig.		centrosomal protein 68 [Source:HGNC Symbol;Acc:HGNC:29076]
ENSG00000011566	MAP4K3	224.49	-0.375473	0.211153	-1.7782	0.075371	0.310964	Non-sig.		mitogen-activated protein kinase kinase kinase kinase 3 [Source:HGNC Symbol;Acc:HGNC:6865]
ENSG00000011600	TYROBP	35.3428	0.405603	0.29832	1.35962	0.173949	0.486571	Non-sig.		transmembrane immune signaling adaptor TYROBP [Source:HGNC Symbol;Acc:HGNC:12449]
ENSG00000011638	TMEM159	111.718	0.0883715	0.1433	0.616687	0.537441	0.812227	Non-sig.		lipid droplet assembly factor 1 [Source:HGNC Symbol;Acc:HGNC:30136]
ENSG00000012048	BRCA1	47.6614	-0.330473	0.269423	-1.22659	0.219976	0.543724	Non-sig.		BRCA1 DNA repair associated [Source:HGNC Symbol;Acc:HGNC:1100]
ENSG00000012061	ERCC1	270.199	0.179487	0.0874393	2.0527	0.0401019	0.214844	Non-sig.		ERCC excision repair 1, endonuclease non-catalytic subunit [Source:HGNC Symbol;Acc:HGNC:3433]
ENSG00000012124	CD22	4.79874	-0.706208	0.792887	-0.890679	0.373101	0.697613	Non-sig.		CD22 molecule [Source:HGNC Symbol;Acc:HGNC:1643]
ENSG00000012171	SEMA3B	98.7737	-0.512251	0.186887	-2.74096	0.00612603	0.0618474	Non-sig.		semaphorin 3B [Source:HGNC Symbol;Acc:HGNC:10724]
ENSG00000012174	MBTPS2	92.1987	-0.0219786	0.136524	-0.160988	0.872103	0.957767	Non-sig.		membrane bound transcription factor peptidase, site 2 [Source:HGNC Symbol;Acc:HGNC:15455]
ENSG00000012211	PRICKLE3	51.2942	-0.315264	0.156763	-2.01109	0.0443159	0.226771	Non-sig.		prickle planar cell polarity protein 3 [Source:HGNC Symbol;Acc:HGNC:6645]
ENSG00000012232	EXTL3	113.749	-0.0587409	0.093643	-0.627285	0.530472	0.8082	Non-sig.
ENSG00000012660	ELOVL5	375.299	0.235645	0.138547	1.70083	0.0889753	0.342404	Non-sig.		ELOVL fatty acid elongase 5 [Source:HGNC Symbol;Acc:HGNC:21308]
ENSG00000012779	ALOX5	3.42082	0.410719	0.882434	0.46544	0.641617	0.864077	Non-sig.
ENSG00000012817	KDM5D	46.5008	0.922736	0.521544	1.76924	0.0768543	0.31426	Non-sig.		lysine demethylase 5D [Source:HGNC Symbol;Acc:HGNC:11115]
ENSG00000012822	CALCOCO1	68.3133	0.334768	0.295692	1.13215	0.25757	0.586533	Non-sig.		calcium binding and coiled-coil domain 1 [Source:HGNC Symbol;Acc:HGNC:29306]
ENSG00000012963	UBR7	83.3516	0.308169	0.247844	1.2434	0.213722	0.535351	Non-sig.		ubiquitin protein ligase E3 component n-recognin 7 [Source:HGNC Symbol;Acc:HGNC:20344]
ENSG00000012983	MAP4K5	405.132	0.105078	0.0744778	1.41086	0.158287	0.465059	Non-sig.		mitogen-activated protein kinase kinase kinase kinase 5 [Source:HGNC Symbol;Acc:HGNC:6867]
ENSG00000013016	EHD3	82.7703	-0.174539	0.2175	-0.802477	0.422277	0.733558	Non-sig.		EH domain containing 3 [Source:HGNC Symbol;Acc:HGNC:3244]
ENSG00000013275	PSMC4	485.527	0.122284	0.0909787	1.34409	0.178919	0.492703	Non-sig.		proteasome 26S subunit, ATPase 4 [Source:HGNC Symbol;Acc:HGNC:9551]
ENSG00000013288	MAN2B2	255.127	0.13315	0.100332	1.32709	0.18448	0.499506	Non-sig.		mannosidase alpha class 2B member 2 [Source:HGNC Symbol;Acc:HGNC:29623]
ENSG00000013293	SLC7A14	4.27164	-0.44863	0.625781	-0.716911	0.473429	0.772373	Non-sig.		solute carrier family 7 member 14 [Source:HGNC Symbol;Acc:HGNC:29326]
ENSG00000013297	CLDN11	727.131	-0.570471	0.142568	-4.0014	6.29696e-05	0.00185797	Sig. genes		claudin 11 [Source:HGNC Symbol;Acc:HGNC:8514]
ENSG00000013306	SLC25A39	364.071	-0.14119	0.0772611	-1.82744	0.0676341	0.293423	Non-sig.		solute carrier family 25 member 39 [Source:HGNC Symbol;Acc:HGNC:24279]
ENSG00000013364	MVP	296.441	-0.151408	0.0942642	-1.60621	0.108228	0.380891	Non-sig.		major vault protein [Source:HGNC Symbol;Acc:HGNC:7531]
ENSG00000013374	NUB1	448.789	-0.0826747	0.0915928	-0.902634	0.36672	0.691359	Non-sig.		negative regulator of ubiquitin like proteins 1 [Source:HGNC Symbol;Acc:HGNC:17623]
ENSG00000013375	PGM3	480.288	0.24219	0.451672	0.536208	0.591815	0.840289	Non-sig.		phosphoglucomutase 3 [Source:HGNC Symbol;Acc:HGNC:8907]
ENSG00000013392	RWDD2A	43.6729	-0.160882	0.190598	-0.844092	0.398618	0.716546	Non-sig.		RWD domain containing 2A [Source:HGNC Symbol;Acc:HGNC:21385]
ENSG00000013441	CLK1	114.582	-0.107417	0.185617	-0.578703	0.562789	0.824841	Non-sig.
ENSG00000013503	POLR3B	45.8287	0.16739	0.284302	0.588777	0.556011	0.820885	Non-sig.		RNA polymerase III subunit B [Source:HGNC Symbol;Acc:HGNC:30348]
ENSG00000013523	ANGEL1	49.4517	-0.0625929	0.183536	-0.341039	0.733074	0.904613	Non-sig.		angel homolog 1 [Source:HGNC Symbol;Acc:HGNC:19961]
ENSG00000013561	RNF14	106.348	-0.284515	0.147045	-1.93488	0.0530049	0.253556	Non-sig.		ring finger protein 14 [Source:HGNC Symbol;Acc:HGNC:10058]
ENSG00000013563	DNASE1L1	51.5128	-0.0486774	0.192706	-0.252599	0.800578	0.931921	Non-sig.		deoxyribonuclease 1 like 1 [Source:HGNC Symbol;Acc:HGNC:2957]
ENSG00000013573	DDX11	30.0805	-0.0221914	0.353667	-0.0627465	0.949968	0.985635	Non-sig.		DEAD/H-box helicase 11 [Source:HGNC Symbol;Acc:HGNC:2736]
ENSG00000013583	HEBP1	256.41	0.243338	0.0918636	2.64891	0.00807529	0.0744157	Non-sig.		heme binding protein 1 [Source:HGNC Symbol;Acc:HGNC:17176]
ENSG00000013588	GPRC5A	116.424	0.223458	0.242471	0.921588	0.356743	0.683612	Non-sig.		G protein-coupled receptor class C group 5 member A [Source:HGNC Symbol;Acc:HGNC:9836]
ENSG00000013619	MAMLD1	12.0397	0.565934	0.351541	1.60987	0.107427	0.379491	Non-sig.		mastermind like domain containing 1 [Source:HGNC Symbol;Acc:HGNC:2568]
ENSG00000013810	TACC3	28.9499	0.127382	0.238715	0.533613	0.593609	0.840668	Non-sig.		transforming acidic coiled-coil containing protein 3 [Source:HGNC Symbol;Acc:HGNC:11524]
ENSG00000014123	UFL1	270.594	0.0613641	0.111023	0.552713	0.58046	0.833817	Non-sig.		UFM1 specific ligase 1 [Source:HGNC Symbol;Acc:HGNC:23039]
ENSG00000014138	POLA2	35.5497	0.0254414	0.193082	0.131764	0.895171	0.965297	Non-sig.		DNA polymerase alpha 2, accessory subunit [Source:HGNC Symbol;Acc:HGNC:30073]
ENSG00000014164	ZC3H3	12.0711	0.0655488	0.375682	0.174479	0.861489	0.954854	Non-sig.		zinc finger CCCH-type containing 3 [Source:HGNC Symbol;Acc:HGNC:28972]
ENSG00000014216	CAPN1	121.36	-0.0565957	0.168533	-0.335814	0.737011	0.905907	Non-sig.		calpain 1 [Source:HGNC Symbol;Acc:HGNC:1476]
ENSG00000014641	MDH1	361.245	-0.358217	0.0976751	-3.66743	0.000245002	0.0054374	Sig. genes		malate dehydrogenase 1 [Source:HGNC Symbol;Acc:HGNC:6970]
ENSG00000014824	SLC30A9	222.75	-0.0664466	0.0978696	-0.678929	0.497183	0.78755	Non-sig.		solute carrier family 30 member 9 [Source:HGNC Symbol;Acc:HGNC:1329]
ENSG00000014914	MTMR11	40.4796	0.142437	0.218349	0.652337	0.514184	0.797803	Non-sig.		myotubularin related protein 11 [Source:HGNC Symbol;Acc:HGNC:24307]
ENSG00000014919	COX15	164.339	-0.143399	0.120694	-1.18812	0.234787	0.562316	Non-sig.		cytochrome c oxidase assembly homolog COX15 [Source:HGNC Symbol;Acc:HGNC:2263]
ENSG00000015133	CCDC88C	11.0728	0.931209	0.684985	1.35946	0.174001	0.486601	Non-sig.
ENSG00000015153	YAF2	185.097	-0.196483	0.147532	-1.3318	0.182927	0.49747	Non-sig.		YY1 associated factor 2 [Source:HGNC Symbol;Acc:HGNC:17363]
ENSG00000015171	ZMYND11	705.95	-0.0283347	0.0836088	-0.338896	0.734688	0.904925	Non-sig.		zinc finger MYND-type containing 11 [Source:HGNC Symbol;Acc:HGNC:16966]
ENSG00000015285	WAS	9.69871	0.370416	0.456254	0.811863	0.416871	0.729116	Non-sig.		WASP actin nucleation promoting factor [Source:HGNC Symbol;Acc:HGNC:12731]
ENSG00000015475	BID	41.6659	0.468391	0.186753	2.50808	0.012139	0.0989593	Non-sig.		BH3 interacting domain death agonist [Source:HGNC Symbol;Acc:HGNC:1050]
ENSG00000015479	MATR3	841.068	0.0945166	0.106506	0.887434	0.374845	0.699068	Non-sig.		matrin 3 [Source:HGNC Symbol;Acc:HGNC:6912]
ENSG00000015532	XYLT2	133.186	-0.0649207	0.112845	-0.575308	0.565083	0.825863	Non-sig.		xylosyltransferase 2 [Source:HGNC Symbol;Acc:HGNC:15517]
ENSG00000015568	RGPD5	261.899	0.0261801	0.233417	0.11216	0.910696	0.972735	Non-sig.		RANBP2 like and GRIP domain containing 5 [Source:HGNC Symbol;Acc:HGNC:32418]
ENSG00000015676	NUDCD3	369.433	0.0998692	0.178324	0.560043	0.57545	0.831906	Non-sig.		NudC domain containing 3 [Source:HGNC Symbol;Acc:HGNC:22208]
ENSG00000016391	CHDH	108.871	-0.214733	0.152338	-1.40958	0.158663	0.465059	Non-sig.		choline dehydrogenase [Source:HGNC Symbol;Acc:HGNC:24288]
ENSG00000016402	IL20RA	92.1389	-0.445795	0.355511	-1.25396	0.209858	0.530724	Non-sig.		interleukin 20 receptor subunit alpha [Source:HGNC Symbol;Acc:HGNC:6003]
ENSG00000016864	GLT8D1	215.717	-0.0641587	0.106697	-0.601315	0.54763	0.817348	Non-sig.		glycosyltransferase 8 domain containing 1 [Source:HGNC Symbol;Acc:HGNC:24870]
ENSG00000017260	ATP2C1	158.959	0.427427	0.155757	2.74418	0.00606623	0.0613503	Non-sig.		ATPase secretory pathway Ca2+ transporting 1 [Source:HGNC Symbol;Acc:HGNC:13211]
ENSG00000017427	IGF1	130.901	0.0325213	0.490396	0.0663164	0.947126	0.984549	Non-sig.		insulin like growth factor 1 [Source:HGNC Symbol;Acc:HGNC:5464]
ENSG00000017483	SLC38A5	32.869	0.105982	0.505184	0.20979	0.833832	0.944111	Non-sig.
ENSG00000017797	RALBP1	541.258	0.0549959	0.0828164	0.66407	0.506645	0.793053	Non-sig.		ralA binding protein 1 [Source:HGNC Symbol;Acc:HGNC:9841]
ENSG00000018189	RUFY3	363.844	0.113467	0.140006	0.810441	0.417687	0.72969	Non-sig.		RUN and FYVE domain containing 3 [Source:HGNC Symbol;Acc:HGNC:30285]
ENSG00000018236	CNTN1	69.7411	-0.500088	0.180873	-2.76486	0.00569469	0.0587511	Non-sig.		contactin 1 [Source:HGNC Symbol;Acc:HGNC:2171]
ENSG00000018280	SLC11A1	20.9359	-0.25009	0.437815	-0.571223	0.567848	0.827718	Non-sig.		solute carrier family 11 member 1 [Source:HGNC Symbol;Acc:HGNC:10907]
ENSG00000018408	WWTR1	867.755	0.160382	0.105671	1.51774	0.129079	0.419034	Non-sig.		WW domain containing transcription regulator 1 [Source:HGNC Symbol;Acc:HGNC:24042]
ENSG00000018510	AGPS	102.454	0.318632	0.148134	2.15097	0.0314784	0.184001	Non-sig.		alkylglycerone phosphate synthase [Source:HGNC Symbol;Acc:HGNC:327]
ENSG00000018610	STEEP1	94.4505	0.102806	0.131876	0.77956	0.43565	0.745242	Non-sig.		STING1 ER exit protein 1 [Source:HGNC Symbol;Acc:HGNC:26239]
ENSG00000018699	TTC27	41.9342	0.0331639	0.238495	0.139055	0.889406	0.962916	Non-sig.		tetratricopeptide repeat domain 27 [Source:HGNC Symbol;Acc:HGNC:25986]
ENSG00000018869	ZNF582	32.0789	-0.4433	0.26806	-1.65373	0.0981819	0.36004	Non-sig.
ENSG00000019102	VSIG2	10.2803	0.284885	0.522666	0.545062	0.585711	0.837599	Non-sig.		V-set and immunoglobulin domain containing 2 [Source:HGNC Symbol;Acc:HGNC:17149]
ENSG00000019144	PHLDB1	532.86	0.431412	0.0867249	4.97449	6.54189e-07	3.58304e-05	Sig. genes
ENSG00000019169	MARCO	24.0607	0.638146	0.515011	1.23909	0.215311	0.537603	Non-sig.		macrophage receptor with collagenous structure [Source:HGNC Symbol;Acc:HGNC:6895]
ENSG00000019186	CYP24A1	12.5715	1.46906	0.603943	2.43245	0.014997	0.11508	Non-sig.		cytochrome P450 family 24 subfamily A member 1 [Source:HGNC Symbol;Acc:HGNC:2602]
ENSG00000019485	PRDM11	53.2315	0.0164917	0.198496	0.0830831	0.933785	0.979867	Non-sig.		PR/SET domain 11 [Source:HGNC Symbol;Acc:HGNC:13996]
ENSG00000019505	SYT13	62.1655	-0.759986	0.210431	-3.61157	0.000304351	0.00636772	Sig. genes		synaptotagmin 13 [Source:HGNC Symbol;Acc:HGNC:14962]
ENSG00000019549	SNAI2	41.9467	0.245097	0.291263	0.841497	0.40007	0.717308	Non-sig.		snail family transcriptional repressor 2 [Source:HGNC Symbol;Acc:HGNC:11094]
ENSG00000019582	CD74	248.106	-0.494081	0.143526	-3.44244	0.000576488	0.0103768	Sig. genes
ENSG00000019991	HGF	18.1561	1.00121	0.711692	1.4068	0.159485	0.465968	Non-sig.		hepatocyte growth factor [Source:HGNC Symbol;Acc:HGNC:4893]
ENSG00000019995	ZRANB1	180.865	0.13762	0.118737	1.15903	0.246444	0.573672	Non-sig.		zinc finger RANBP2-type containing 1 [Source:HGNC Symbol;Acc:HGNC:18224]
ENSG00000020129	NCDN	65.3404	-0.420614	0.140707	-2.98929	0.00279625	0.0349239	Sig. genes		neurochondrin [Source:HGNC Symbol;Acc:HGNC:17597]
ENSG00000020181	ADGRA2	86.3706	-0.0446327	0.156638	-0.284941	0.775689	0.922973	Non-sig.		adhesion G protein-coupled receptor A2 [Source:HGNC Symbol;Acc:HGNC:17849]
ENSG00000020256	ZFP64	44.3096	-0.0344984	0.215377	-0.160177	0.872742	0.957795	Non-sig.		ZFP64 zinc finger protein [Source:HGNC Symbol;Acc:HGNC:15940]
ENSG00000020426	MNAT1	85.9539	-0.0603197	0.189092	-0.318997	0.749729	0.912204	Non-sig.		MNAT1 component of CDK activating kinase [Source:HGNC Symbol;Acc:HGNC:7181]
ENSG00000020577	SAMD4A	105.765	0.197334	0.196168	1.00594	0.314443	0.64535	Non-sig.		sterile alpha motif domain containing 4A [Source:HGNC Symbol;Acc:HGNC:23023]
ENSG00000020633	RUNX3	24.3855	0.0762095	0.35516	0.214578	0.830096	0.943155	Non-sig.		RUNX family transcription factor 3 [Source:HGNC Symbol;Acc:HGNC:10473]
ENSG00000020922	MRE11	218.934	-0.247029	0.0956888	-2.58159	0.00983478	0.0855053	Non-sig.		MRE11 homolog, double strand break repair nuclease [Source:HGNC Symbol;Acc:HGNC:7230]
ENSG00000021300	PLEKHB1	14.0038	-0.220992	0.429274	-0.514805	0.60669	0.847171	Non-sig.		pleckstrin homology domain containing B1 [Source:HGNC Symbol;Acc:HGNC:19079]
ENSG00000021355	SERPINB1	397.631	-0.530925	0.16433	-3.23085	0.00123422	0.0187488	Sig. genes		serpin family B member 1 [Source:HGNC Symbol;Acc:HGNC:3311]
ENSG00000021574	SPAST	89.0636	0.117649	0.187245	0.628318	0.529795	0.807878	Non-sig.		spastin [Source:HGNC Symbol;Acc:HGNC:11233]
ENSG00000021645	NRXN3	368.128	-0.140656	0.136138	-1.03318	0.301518	0.633454	Non-sig.		neurexin 3 [Source:HGNC Symbol;Acc:HGNC:8010]
ENSG00000021762	OSBPL5	133.778	-0.258149	0.137767	-1.8738	0.0609578	0.276463	Non-sig.		oxysterol binding protein like 5 [Source:HGNC Symbol;Acc:HGNC:16392]
ENSG00000021776	AQR	299.098	0.0295459	0.103837	0.284541	0.775996	0.923053	Non-sig.		aquarius intron-binding spliceosomal factor [Source:HGNC Symbol;Acc:HGNC:29513]
ENSG00000021826	CPS1	6.45795	0.92569	0.522241	1.77253	0.0763061	0.313235	Non-sig.
ENSG00000022267	FHL1	244.617	0.295493	0.115321	2.56236	0.0103964	0.0888358	Non-sig.		four and a half LIM domains 1 [Source:HGNC Symbol;Acc:HGNC:3702]
ENSG00000022277	RTF2	364.89	-0.139151	0.0695069	-2.00197	0.0452879	0.22984	Non-sig.		replication termination factor 2 [Source:HGNC Symbol;Acc:HGNC:15890]
ENSG00000022556	NLRP2	25.4628	-0.771785	0.313513	-2.46173	0.0138268	0.108471	Non-sig.		NLR family pyrin domain containing 2 [Source:HGNC Symbol;Acc:HGNC:22948]
ENSG00000022567	SLC45A4	55.4329	0.10643	0.215544	0.493775	0.621465	0.853624	Non-sig.		solute carrier family 45 member 4 [Source:HGNC Symbol;Acc:HGNC:29196]
ENSG00000022840	RNF10	338.218	-0.124045	0.0987719	-1.25588	0.209161	0.530158	Non-sig.		ring finger protein 10 [Source:HGNC Symbol;Acc:HGNC:10055]
ENSG00000022976	ZNF839	105.386	0.0187442	0.150989	0.124143	0.901202	0.968354	Non-sig.		zinc finger protein 839 [Source:HGNC Symbol;Acc:HGNC:20345]
ENSG00000023041	ZDHHC6	136.549	0.133838	0.10437	1.28234	0.199723	0.519468	Non-sig.		zinc finger DHHC-type palmitoyltransferase 6 [Source:HGNC Symbol;Acc:HGNC:19160]
ENSG00000023171	GRAMD1B	28.9825	0.176968	0.298526	0.592805	0.553312	0.820344	Non-sig.
ENSG00000023191	RNH1	627.244	0.0446332	0.0742686	0.60097	0.54786	0.817348	Non-sig.		ribonuclease/angiogenin inhibitor 1 [Source:HGNC Symbol;Acc:HGNC:10074]
ENSG00000023228	NDUFS1	453.474	-0.52114	0.132731	-3.92628	8.627e-05	0.00235174	Sig. genes		NADH:ubiquinone oxidoreductase core subunit S1 [Source:HGNC Symbol;Acc:HGNC:7707]
ENSG00000023287	RB1CC1	783.543	0.150671	0.0882174	1.70796	0.0876445	0.33992	Non-sig.		RB1 inducible coiled-coil 1 [Source:HGNC Symbol;Acc:HGNC:15574]
ENSG00000023318	ERP44	287.393	0.156627	0.0930293	1.68363	0.0922527	0.347988	Non-sig.
ENSG00000023330	ALAS1	141.413	0.315128	0.114843	2.74398	0.00606995	0.0613503	Non-sig.		5'-aminolevulinate synthase 1 [Source:HGNC Symbol;Acc:HGNC:396]
ENSG00000023445	BIRC3	50.3182	-0.394346	0.309593	-1.27376	0.20275	0.522797	Non-sig.		baculoviral IAP repeat containing 3 [Source:HGNC Symbol;Acc:HGNC:591]
ENSG00000023516	AKAP11	369.958	-0.0539704	0.0725135	-0.744281	0.456707	0.760117	Non-sig.		A-kinase anchoring protein 11 [Source:HGNC Symbol;Acc:HGNC:369]
ENSG00000023572	GLRX2	96.0535	-0.184504	0.197384	-0.934747	0.349918	0.678527	Non-sig.		glutaredoxin 2 [Source:HGNC Symbol;Acc:HGNC:16065]
ENSG00000023608	SNAPC1	337.498	0.0330416	0.113664	0.290695	0.771285	0.92145	Non-sig.		small nuclear RNA activating complex polypeptide 1 [Source:HGNC Symbol;Acc:HGNC:11134]
ENSG00000023697	DERA	88.4729	-0.0446361	0.198446	-0.224928	0.822035	0.939903	Non-sig.		deoxyribose-phosphate aldolase [Source:HGNC Symbol;Acc:HGNC:24269]
ENSG00000023734	STRAP	390.351	0.194784	0.0926329	2.10275	0.0354876	0.199048	Non-sig.		serine/threonine kinase receptor associated protein [Source:HGNC Symbol;Acc:HGNC:30796]
ENSG00000023839	ABCC2	5.03099	0.701045	0.904924	0.7747	0.438517	0.747591	Non-sig.		ATP binding cassette subfamily C member 2 [Source:HGNC Symbol;Acc:HGNC:53]
ENSG00000023892	DEF6	17.5099	0.199496	0.387886	0.514317	0.60703	0.847184	Non-sig.		DEF6 guanine nucleotide exchange factor [Source:HGNC Symbol;Acc:HGNC:2760]
ENSG00000023902	PLEKHO1	128.176	0.533381	0.243172	2.19343	0.0282764	0.172549	Non-sig.		pleckstrin homology domain containing O1 [Source:HGNC Symbol;Acc:HGNC:24310]
ENSG00000023909	GCLM	513.976	0.88974	0.0934053	9.52559	1.64109e-21	1.13046e-18	Sig. genes		glutamate-cysteine ligase modifier subunit [Source:HGNC Symbol;Acc:HGNC:4312]
ENSG00000024048	UBR2	246.672	-0.170978	0.0818724	-2.08835	0.036766	0.203046	Non-sig.		ubiquitin protein ligase E3 component n-recognin 2 [Source:HGNC Symbol;Acc:HGNC:21289]
ENSG00000024422	EHD2	99.8194	0.50755	0.198875	2.55211	0.0107074	0.0908224	Non-sig.		EH domain containing 2 [Source:HGNC Symbol;Acc:HGNC:3243]
ENSG00000024526	DEPDC1	8.56021	2.20587	0.774039	2.84982	0.00437445	0.0483215	Sig. genes		DEP domain containing 1 [Source:HGNC Symbol;Acc:HGNC:22949]
ENSG00000024862	CCDC28A	118.529	0.0843055	0.123478	0.682758	0.49476	0.785912	Non-sig.		coiled-coil domain containing 28A [Source:HGNC Symbol;Acc:HGNC:21098]
ENSG00000025039	RRAGD	488.964	0.143175	0.102177	1.40124	0.161143	0.468161	Non-sig.		Ras related GTP binding D [Source:HGNC Symbol;Acc:HGNC:19903]
ENSG00000025156	HSF2	138.306	0.127886	0.126268	1.01282	0.311148	0.642859	Non-sig.		heat shock transcription factor 2 [Source:HGNC Symbol;Acc:HGNC:5225]
ENSG00000025293	PHF20	377.858	-0.188283	0.116631	-1.61435	0.106451	0.377458	Non-sig.		PHD finger protein 20 [Source:HGNC Symbol;Acc:HGNC:16098]
ENSG00000025423	HSD17B6	14.0561	0.77289	0.407518	1.89658	0.0578838	0.26802	Non-sig.		hydroxysteroid 17-beta dehydrogenase 6 [Source:HGNC Symbol;Acc:HGNC:23316]
ENSG00000025434	NR1H3	28.8946	-0.557	0.237726	-2.34303	0.0191276	0.134625	Non-sig.		nuclear receptor subfamily 1 group H member 3 [Source:HGNC Symbol;Acc:HGNC:7966]
ENSG00000025708	TYMP	60.6548	-0.282312	0.197952	-1.42616	0.153822	0.458777	Non-sig.		thymidine phosphorylase [Source:HGNC Symbol;Acc:HGNC:3148]
ENSG00000025770	NCAPH2	71.8552	-0.198944	0.193616	-1.02752	0.304175	0.636274	Non-sig.		non-SMC condensin II complex subunit H2 [Source:HGNC Symbol;Acc:HGNC:25071]
ENSG00000025772	TOMM34	230.453	0.0902667	0.101249	0.891528	0.372646	0.697324	Non-sig.		translocase of outer mitochondrial membrane 34 [Source:HGNC Symbol;Acc:HGNC:15746]
ENSG00000025796	SEC63	986.39	-0.0333899	0.0899357	-0.371264	0.710441	0.893529	Non-sig.		SEC63 homolog, protein translocation regulator [Source:HGNC Symbol;Acc:HGNC:21082]
ENSG00000025800	KPNA6	1100.71	-0.0260274	0.0652781	-0.398716	0.690103	0.884765	Non-sig.		karyopherin subunit alpha 6 [Source:HGNC Symbol;Acc:HGNC:6399]
ENSG00000026025	VIM	4341.41	0.0118737	0.102083	0.116314	0.907403	0.971042	Non-sig.		vimentin [Source:HGNC Symbol;Acc:HGNC:12692]
ENSG00000026036	RTEL1-TNFRSF6B	15.6928	0.201683	0.331626	0.608165	0.543078	0.814328	Non-sig.		RTEL1-TNFRSF6B readthrough (NMD candidate) [Source:HGNC Symbol;Acc:HGNC:44095]
ENSG00000026103	FAS	23.5061	0.462124	0.415986	1.11091	0.266606	0.596465	Non-sig.
ENSG00000026297	RNASET2	153.399	-0.147211	0.118824	-1.2389	0.215381	0.537702	Non-sig.		ribonuclease T2 [Source:HGNC Symbol;Acc:HGNC:21686]
ENSG00000026508	CD44	546.009	0.55949	0.410485	1.363	0.172883	0.48494	Non-sig.
ENSG00000026559	KCNG1	10.232	-0.32034	0.497333	-0.644115	0.519501	0.8015	Non-sig.		potassium voltage-gated channel modifier subfamily G member 1 [Source:HGNC Symbol;Acc:HGNC:6248]
ENSG00000026652	AGPAT4	84.4181	-0.216947	0.224196	-0.967668	0.33321	0.662963	Non-sig.		1-acylglycerol-3-phosphate O-acyltransferase 4 [Source:HGNC Symbol;Acc:HGNC:20885]
ENSG00000026751	SLAMF7	9.25548	1.14033	0.61321	1.85961	0.0629402	0.281322	Non-sig.		SLAM family member 7 [Source:HGNC Symbol;Acc:HGNC:21394]
ENSG00000026950	BTN3A1	23.7705	-0.430018	0.301328	-1.42708	0.153558	0.458514	Non-sig.		butyrophilin subfamily 3 member A1 [Source:HGNC Symbol;Acc:HGNC:1138]
ENSG00000027001	MIPEP	40.2958	-0.282714	0.219469	-1.28817	0.197686	0.516642	Non-sig.		mitochondrial intermediate peptidase [Source:HGNC Symbol;Acc:HGNC:7104]
ENSG00000027075	PRKCH	27.1103	-0.685675	0.417634	-1.64181	0.10063	0.365131	Non-sig.
ENSG00000027697	IFNGR1	51.5257	0.433689	0.186091	2.33052	0.0197785	0.137246	Non-sig.
ENSG00000027847	B4GALT7	172.968	-0.070896	0.119006	-0.595733	0.551354	0.819413	Non-sig.		beta-1,4-galactosyltransferase 7 [Source:HGNC Symbol;Acc:HGNC:930]
ENSG00000027869	SH2D2A	24.4199	0.152409	0.300108	0.507847	0.61156	0.849531	Non-sig.		SH2 domain containing 2A [Source:HGNC Symbol;Acc:HGNC:10821]
ENSG00000028116	VRK2	75.4599	0.11495	0.187366	0.613505	0.539543	0.812908	Non-sig.		VRK serine/threonine kinase 2 [Source:HGNC Symbol;Acc:HGNC:12719]
ENSG00000028137	TNFRSF1B	37.1061	-0.289663	0.27425	-1.0562	0.290876	0.623502	Non-sig.		TNF receptor superfamily member 1B [Source:HGNC Symbol;Acc:HGNC:11917]
ENSG00000028203	VEZT	375.391	-0.0260238	0.0957136	-0.271893	0.785704	0.926702	Non-sig.
ENSG00000028277	POU2F2	459.946	-0.157845	0.139808	-1.12901	0.258892	0.588198	Non-sig.
ENSG00000028310	BRD9	297.572	-0.0243842	0.13115	-0.185926	0.852503	0.951512	Non-sig.		bromodomain containing 9 [Source:HGNC Symbol;Acc:HGNC:25818]
ENSG00000028528	SNX1	205.687	0.038964	0.130771	0.297956	0.765737	0.918582	Non-sig.		sorting nexin 1 [Source:HGNC Symbol;Acc:HGNC:11172]
ENSG00000028839	TBPL1	35.0952	0.1502	0.224985	0.667601	0.504388	0.791657	Non-sig.		TATA-box binding protein like 1 [Source:HGNC Symbol;Acc:HGNC:11589]
ENSG00000029153	ARNTL2	11.2244	0.864606	0.380857	2.27016	0.0231981	0.151028	Non-sig.
ENSG00000029363	BCLAF1	972.243	0.00912352	0.0881151	0.103541	0.917534	0.974486	Non-sig.		BCL2 associated transcription factor 1 [Source:HGNC Symbol;Acc:HGNC:16863]
ENSG00000029364	SLC39A9	203.339	-0.0723838	0.113048	-0.640291	0.521983	0.802856	Non-sig.		solute carrier family 39 member 9 [Source:HGNC Symbol;Acc:HGNC:20182]
ENSG00000029534	ANK1	198.006	-1.75107	0.152972	-11.447	2.4336e-30	5.44823e-27	Sig. genes		ankyrin 1 [Source:HGNC Symbol;Acc:HGNC:492]
ENSG00000029639	TFB1M	102.375	-0.17761	0.151117	-1.17531	0.23987	0.56726	Non-sig.		transcription factor B1, mitochondrial [Source:HGNC Symbol;Acc:HGNC:17037]
ENSG00000029725	RABEP1	501.091	-0.0223697	0.125611	-0.178088	0.858654	0.954001	Non-sig.		rabaptin, RAB GTPase binding effector protein 1 [Source:HGNC Symbol;Acc:HGNC:17677]
ENSG00000029993	HMGB3	67.0029	0.933032	0.29032	3.2138	0.00130989	0.0196813	Sig. genes		high mobility group box 3 [Source:HGNC Symbol;Acc:HGNC:5004]
ENSG00000030066	NUP160	78.4921	0.235931	0.191703	1.23071	0.218431	0.541469	Non-sig.
ENSG00000030110	BAK1	29.6817	-0.288419	0.265116	-1.0879	0.27664	0.608435	Non-sig.
ENSG00000030419	IKZF2	136.442	-0.395108	0.19934	-1.98208	0.0474705	0.237353	Non-sig.		IKAROS family zinc finger 2 [Source:HGNC Symbol;Acc:HGNC:13177]
ENSG00000030582	GRN	1599.04	0.31276	0.127555	2.45196	0.0142082	0.110446	Non-sig.		granulin precursor [Source:HGNC Symbol;Acc:HGNC:4601]
ENSG00000031003	FAM13B	89.0252	-0.0448553	0.269681	-0.166327	0.8679	0.956661	Non-sig.
ENSG00000031081	ARHGAP31	77.82	0.215	0.167486	1.28369	0.19925	0.518687	Non-sig.		Rho GTPase activating protein 31 [Source:HGNC Symbol;Acc:HGNC:29216]
ENSG00000031691	CENPQ	49.6065	0.0747732	0.208381	0.358829	0.719723	0.897648	Non-sig.		centromere protein Q [Source:HGNC Symbol;Acc:HGNC:21347]
ENSG00000031698	SARS1	943.109	0.183162	0.109214	1.67709	0.0935248	0.350546	Non-sig.		seryl-tRNA synthetase 1 [Source:HGNC Symbol;Acc:HGNC:10537]
ENSG00000031823	RANBP3	166.987	-0.0723694	0.103784	-0.697309	0.485609	0.779814	Non-sig.		RAN binding protein 3 [Source:HGNC Symbol;Acc:HGNC:9850]
ENSG00000032219	ARID4A	379.397	-0.274361	0.124	-2.21259	0.0269261	0.167105	Non-sig.		AT-rich interaction domain 4A [Source:HGNC Symbol;Acc:HGNC:9885]
ENSG00000032389	EIPR1	39.8302	0.133113	0.200316	0.664516	0.50636	0.793014	Non-sig.		EARP complex and GARP complex interacting protein 1 [Source:HGNC Symbol;Acc:HGNC:12383]
ENSG00000032444	PNPLA6	106.518	-0.43558	0.116092	-3.75203	0.000175409	0.00416577	Sig. genes		patatin like phospholipase domain containing 6 [Source:HGNC Symbol;Acc:HGNC:16268]
ENSG00000032742	IFT88	113.644	-0.0590649	0.190163	-0.310602	0.756103	0.9143	Non-sig.		intraflagellar transport 88 [Source:HGNC Symbol;Acc:HGNC:20606]
ENSG00000033011	ALG1	113.421	-0.110487	0.140946	-0.783895	0.433102	0.743336	Non-sig.		ALG1 chitobiosyldiphosphodolichol beta-mannosyltransferase [Source:HGNC Symbol;Acc:HGNC:18294]
ENSG00000033030	ZCCHC8	107.111	-0.104682	0.210208	-0.497994	0.618488	0.852546	Non-sig.		zinc finger CCHC-type containing 8 [Source:HGNC Symbol;Acc:HGNC:25265]
ENSG00000033050	ABCF2	313.764	-0.441218	0.442087	-0.998035	0.318263	0.648917	Non-sig.		ATP binding cassette subfamily F member 2 [Source:HGNC Symbol;Acc:HGNC:71]
ENSG00000033100	CHPF2	302.254	0.447334	0.118769	3.76642	0.000165602	0.00395985	Sig. genes
ENSG00000033122	LRRC7	4.06636	0.725526	1.04719	0.692833	0.488414	0.7815	Non-sig.		leucine rich repeat containing 7 [Source:HGNC Symbol;Acc:HGNC:18531]
ENSG00000033170	FUT8	60.7568	0.518465	0.220679	2.34941	0.018803	0.133529	Non-sig.		fucosyltransferase 8 [Source:HGNC Symbol;Acc:HGNC:4019]
ENSG00000033178	UBA6	336.344	0.0964456	0.111519	0.864834	0.38713	0.708005	Non-sig.		ubiquitin like modifier activating enzyme 6 [Source:HGNC Symbol;Acc:HGNC:25581]
ENSG00000033327	GAB2	113.445	0.349724	0.164255	2.12915	0.0332422	0.190884	Non-sig.		GRB2 associated binding protein 2 [Source:HGNC Symbol;Acc:HGNC:14458]
ENSG00000033627	ATP6V0A1	433.887	0.0661068	0.11296	0.585225	0.558397	0.822441	Non-sig.		ATPase H+ transporting V0 subunit a1 [Source:HGNC Symbol;Acc:HGNC:865]
ENSG00000033800	PIAS1	281.305	-0.137489	0.168802	-0.814501	0.415358	0.727925	Non-sig.		protein inhibitor of activated STAT 1 [Source:HGNC Symbol;Acc:HGNC:2752]
ENSG00000033867	SLC4A7	453.915	0.475605	0.146606	3.2441	0.00117822	0.0180822	Sig. genes
ENSG00000034053	APBA2	17.0994	0.583226	0.341089	1.70989	0.0872861	0.33903	Non-sig.		amyloid beta precursor protein binding family A member 2 [Source:HGNC Symbol;Acc:HGNC:579]
ENSG00000034152	MAP2K3	136.493	-0.271842	0.121175	-2.24338	0.0248724	0.158585	Non-sig.		mitogen-activated protein kinase kinase 3 [Source:HGNC Symbol;Acc:HGNC:6843]
ENSG00000034239	EFCAB1	16.336	-0.499301	0.6109	-0.81732	0.413746	0.72693	Non-sig.		EF-hand calcium binding domain 1 [Source:HGNC Symbol;Acc:HGNC:25678]
ENSG00000034510	TMSB10	1624.45	0.684708	0.170146	4.02424	5.71592e-05	0.00171191	Sig. genes		thymosin beta 10 [Source:HGNC Symbol;Acc:HGNC:11879]
ENSG00000034533	ASTE1	30.9959	-0.564002	0.230411	-2.44781	0.0143728	0.111484	Non-sig.		asteroid homolog 1 [Source:HGNC Symbol;Acc:HGNC:25021]
ENSG00000034677	RNF19A	146.745	0.284126	0.248931	1.14138	0.25371	0.581887	Non-sig.		ring finger protein 19A, RBR E3 ubiquitin protein ligase [Source:HGNC Symbol;Acc:HGNC:13432]
ENSG00000034693	PEX3	43.6783	-0.077037	0.18569	-0.414869	0.678238	0.879724	Non-sig.		peroxisomal biogenesis factor 3 [Source:HGNC Symbol;Acc:HGNC:8858]
ENSG00000034713	GABARAPL2	482.994	-0.0187197	0.0817006	-0.229125	0.818771	0.938749	Non-sig.		GABA type A receptor associated protein like 2 [Source:HGNC Symbol;Acc:HGNC:13291]
ENSG00000034971	MYOC	2148	0.137529	0.213588	0.643902	0.519639	0.8015	Non-sig.		myocilin [Source:HGNC Symbol;Acc:HGNC:7610]
ENSG00000035115	SH3YL1	110.226	0.096394	0.199802	0.482447	0.629489	0.857816	Non-sig.		SH3 and SYLF domain containing 1 [Source:HGNC Symbol;Acc:HGNC:29546]
ENSG00000035141	FAM136A	161.02	-0.230009	0.0918281	-2.50477	0.012253	0.0997508	Non-sig.		family with sequence similarity 136 member A [Source:HGNC Symbol;Acc:HGNC:25911]
ENSG00000035403	VCL	449.127	0.299688	0.0889158	3.37047	0.000750413	0.0128121	Sig. genes		vinculin [Source:HGNC Symbol;Acc:HGNC:12665]
ENSG00000035664	DAPK2	23.3458	-0.218978	0.284575	-0.76949	0.441602	0.749393	Non-sig.		death associated protein kinase 2 [Source:HGNC Symbol;Acc:HGNC:2675]
ENSG00000035681	NSMAF	116.192	0.154199	0.139275	1.10716	0.268227	0.598202	Non-sig.		neutral sphingomyelinase activation associated factor [Source:HGNC Symbol;Acc:HGNC:8017]
ENSG00000035687	ADSS2	191.932	-0.0527298	0.124771	-0.422614	0.672577	0.87747	Non-sig.		adenylosuccinate synthase 2 [Source:HGNC Symbol;Acc:HGNC:292]
ENSG00000035862	TIMP2	2676.99	0.192409	0.0723501	2.65942	0.00782756	0.0727135	Non-sig.		TIMP metallopeptidase inhibitor 2 [Source:HGNC Symbol;Acc:HGNC:11821]
ENSG00000035928	RFC1	478.328	-0.293282	0.0853867	-3.43475	0.000593093	0.0106223	Sig. genes
ENSG00000036054	TBC1D23	105.197	0.0262599	0.144283	0.182003	0.855581	0.952634	Non-sig.		TBC1 domain family member 23 [Source:HGNC Symbol;Acc:HGNC:25622]
ENSG00000036257	CUL3	222.587	0.260011	0.170529	1.52473	0.127326	0.416361	Non-sig.
ENSG00000036448	MYOM2	21.7665	-0.229717	0.305721	-0.751395	0.452415	0.756772	Non-sig.		myomesin 2 [Source:HGNC Symbol;Acc:HGNC:7614]
ENSG00000036530	CYP46A1	95.3924	-0.373464	0.167488	-2.2298	0.0257608	0.162007	Non-sig.		cytochrome P450 family 46 subfamily A member 1 [Source:HGNC Symbol;Acc:HGNC:2641]
ENSG00000036549	ZZZ3	278.756	0.179905	0.142664	1.26104	0.207295	0.528467	Non-sig.		zinc finger ZZ-type containing 3 [Source:HGNC Symbol;Acc:HGNC:24523]
ENSG00000036672	USP2	7.39854	1.31431	0.575517	2.28371	0.0223888	0.147855	Non-sig.		ubiquitin specific peptidase 2 [Source:HGNC Symbol;Acc:HGNC:12618]
ENSG00000037042	TUBG2	176.742	-0.20944	0.135625	-1.54426	0.122525	0.407733	Non-sig.		tubulin gamma 2 [Source:HGNC Symbol;Acc:HGNC:12419]
ENSG00000037241	RPL26L1	119.753	-0.0472985	0.125338	-0.377369	0.7059	0.891879	Non-sig.		ribosomal protein L26 like 1 [Source:HGNC Symbol;Acc:HGNC:17050]
ENSG00000037474	NSUN2	111.684	0.070048	0.157548	0.444615	0.656598	0.870195	Non-sig.		NOP2/Sun RNA methyltransferase 2 [Source:HGNC Symbol;Acc:HGNC:25994]
ENSG00000037637	FBXO42	85.5929	0.0498098	0.133008	0.374487	0.708042	0.892214	Non-sig.		F-box protein 42 [Source:HGNC Symbol;Acc:HGNC:29249]
ENSG00000037749	MFAP3	70.4889	0.0554368	0.228542	0.242567	0.808341	0.934377	Non-sig.		microfibril associated protein 3 [Source:HGNC Symbol;Acc:HGNC:7034]
ENSG00000037757	MRI1	90.272	-0.32223	0.168114	-1.91674	0.0552708	0.259544	Non-sig.		methylthioribose-1-phosphate isomerase 1 [Source:HGNC Symbol;Acc:HGNC:28469]
ENSG00000037897	METTL1	66.4805	-0.0555336	0.194531	-0.285475	0.77528	0.922732	Non-sig.		methyltransferase 1, tRNA methylguanosine [Source:HGNC Symbol;Acc:HGNC:7030]
ENSG00000038002	AGA	93.6684	0.116266	0.165349	0.70316	0.481956	0.778069	Non-sig.		aspartylglucosaminidase [Source:HGNC Symbol;Acc:HGNC:318]
ENSG00000038210	PI4K2B	7.33913	0.085352	0.375381	0.227374	0.820133	0.939152	Non-sig.		phosphatidylinositol 4-kinase type 2 beta [Source:HGNC Symbol;Acc:HGNC:18215]
ENSG00000038219	BOD1L1	1049.38	-0.0728439	0.0811434	-0.897718	0.369336	0.693529	Non-sig.		biorientation of chromosomes in cell division 1 like 1 [Source:HGNC Symbol;Acc:HGNC:31792]
ENSG00000038274	MAT2B	126.218	0.00762751	0.0927432	0.0822433	0.934453	0.980092	Non-sig.
ENSG00000038382	TRIO	226.664	0.514909	0.201907	2.55023	0.0107653	0.0911497	Non-sig.
ENSG00000038427	VCAN	108.88	2.48498	0.323098	7.6911	1.45877e-14	4.35444e-12	Sig. genes		versican [Source:HGNC Symbol;Acc:HGNC:2464]
ENSG00000038532	CLEC16A	76.8129	-0.277974	0.363499	-0.764717	0.44444	0.751219	Non-sig.		C-type lectin domain containing 16A [Source:HGNC Symbol;Acc:HGNC:29013]
ENSG00000038945	MSR1	8.18234	-0.173448	0.619399	-0.280026	0.779458	0.924919	Non-sig.		macrophage scavenger receptor 1 [Source:HGNC Symbol;Acc:HGNC:7376]
ENSG00000039068	CDH1	30.2096	0.694472	0.504934	1.37537	0.169017	0.480033	Non-sig.		cadherin 1 [Source:HGNC Symbol;Acc:HGNC:1748]
ENSG00000039123	MTREX	271.485	-0.204779	0.0930297	-2.20123	0.0277199	0.170314	Non-sig.		Mtr4 exosome RNA helicase [Source:HGNC Symbol;Acc:HGNC:18734]
ENSG00000039139	DNAH5	11.5046	-1.92897	0.492054	-3.92025	8.8456e-05	0.00240038	Sig. genes		dynein axonemal heavy chain 5 [Source:HGNC Symbol;Acc:HGNC:2950]
ENSG00000039319	ZFYVE16	253.304	0.323233	0.141407	2.28583	0.0222642	0.147411	Non-sig.		zinc finger FYVE-type containing 16 [Source:HGNC Symbol;Acc:HGNC:20756]
ENSG00000039523	RIPOR1	317.832	0.314597	0.0896334	3.50982	0.000448417	0.00860593	Sig. genes		RHO family interacting cell polarization regulator 1 [Source:HGNC Symbol;Acc:HGNC:25836]
ENSG00000039560	RAI14	921.922	0.308874	0.159261	1.93942	0.0524499	0.252369	Non-sig.		retinoic acid induced 14 [Source:HGNC Symbol;Acc:HGNC:14873]
ENSG00000039650	PNKP	180.844	-0.0263024	0.185931	-0.141463	0.887504	0.962412	Non-sig.		polynucleotide kinase 3'-phosphatase [Source:HGNC Symbol;Acc:HGNC:9154]
ENSG00000040199	PHLPP2	63.8717	0.162498	0.247209	0.657329	0.510969	0.79539	Non-sig.		PH domain and leucine rich repeat protein phosphatase 2 [Source:HGNC Symbol;Acc:HGNC:29149]
ENSG00000040275	SPDL1	118.816	-0.0597865	0.171094	-0.349437	0.726761	0.901406	Non-sig.		spindle apparatus coiled-coil protein 1 [Source:HGNC Symbol;Acc:HGNC:26010]
ENSG00000040341	STAU2	405.833	-0.171087	0.119112	-1.43635	0.150903	0.454269	Non-sig.		staufen double-stranded RNA binding protein 2 [Source:HGNC Symbol;Acc:HGNC:11371]
ENSG00000040487	SLC66A1	53.1718	0.407822	0.15889	2.5667	0.0102672	0.087921	Non-sig.		solute carrier family 66 member 1 [Source:HGNC Symbol;Acc:HGNC:26001]
ENSG00000040531	CTNS	90.308	-0.0222168	0.162401	-0.136802	0.891188	0.96336	Non-sig.		cystinosin, lysosomal cystine transporter [Source:HGNC Symbol;Acc:HGNC:2518]
ENSG00000040608	RTN4R	56.2668	-0.148804	0.161992	-0.91859	0.35831	0.684666	Non-sig.		reticulon 4 receptor [Source:HGNC Symbol;Acc:HGNC:18601]
ENSG00000040633	PHF23	159.181	0.0992911	0.0902144	1.10061	0.271065	0.601435	Non-sig.		PHD finger protein 23 [Source:HGNC Symbol;Acc:HGNC:28428]
ENSG00000040933	INPP4A	101.611	-0.274494	0.280178	-0.979715	0.327227	0.656763	Non-sig.		inositol polyphosphate-4-phosphatase type I A [Source:HGNC Symbol;Acc:HGNC:6074]
ENSG00000041353	RAB27B	26.4891	0.256036	0.463055	0.552929	0.580312	0.833806	Non-sig.		RAB27B, member RAS oncogene family [Source:HGNC Symbol;Acc:HGNC:9767]
ENSG00000041357	PSMA4	630.382	-0.135364	0.0955221	-1.4171	0.156454	0.462522	Non-sig.		proteasome 20S subunit alpha 4 [Source:HGNC Symbol;Acc:HGNC:9533]
ENSG00000041802	LSG1	350.228	-0.00324394	0.0853475	-0.0380086	0.969681	0.992743	Non-sig.		large 60S subunit nuclear export GTPase 1 [Source:HGNC Symbol;Acc:HGNC:25652]
ENSG00000041880	PARP3	158.175	-0.346625	0.12599	-2.75121	0.00593761	0.0604468	Non-sig.		poly(ADP-ribose) polymerase family member 3 [Source:HGNC Symbol;Acc:HGNC:273]
ENSG00000041982	TNC	31.4456	1.22366	0.294374	4.15683	3.22692e-05	0.0010585	Sig. genes	Stroma_marker	tenascin C [Source:HGNC Symbol;Acc:HGNC:5318]
ENSG00000041988	THAP3	57.9214	-0.162535	0.164051	-0.990763	0.321801	0.652299	Non-sig.
ENSG00000042062	RIPOR3	67.9353	-0.710616	0.177785	-3.99705	6.41361e-05	0.00188413	Sig. genes		RIPOR family member 3 [Source:HGNC Symbol;Acc:HGNC:16168]
ENSG00000042088	TDP1	50.9882	0.103039	0.217382	0.474	0.6355	0.861196	Non-sig.		tyrosyl-DNA phosphodiesterase 1 [Source:HGNC Symbol;Acc:HGNC:18884]
ENSG00000042286	AIFM2	70.4967	0.186327	0.120904	1.54111	0.12329	0.409518	Non-sig.		apoptosis inducing factor mitochondria associated 2 [Source:HGNC Symbol;Acc:HGNC:21411]
ENSG00000042317	SPATA7	116.107	-0.0672101	0.165579	-0.40591	0.684809	0.882104	Non-sig.		spermatogenesis associated 7 [Source:HGNC Symbol;Acc:HGNC:20423]
ENSG00000042429	MED17	78.747	-0.0243209	0.177677	-0.136882	0.891124	0.96336	Non-sig.		mediator complex subunit 17 [Source:HGNC Symbol;Acc:HGNC:2375]
ENSG00000042445	RETSAT	369.213	-0.116468	0.100275	-1.16149	0.245442	0.572902	Non-sig.		retinol saturase [Source:HGNC Symbol;Acc:HGNC:25991]
ENSG00000042493	CAPG	116.046	0.252757	0.194337	1.30061	0.193391	0.510626	Non-sig.		capping actin protein, gelsolin like [Source:HGNC Symbol;Acc:HGNC:1474]
ENSG00000042753	AP2S1	249.845	-0.0611183	0.098172	-0.622563	0.533572	0.810334	Non-sig.		adaptor related protein complex 2 subunit sigma 1 [Source:HGNC Symbol;Acc:HGNC:565]
ENSG00000042832	TG	9.43248	-0.807963	0.659254	-1.22557	0.22036	0.544116	Non-sig.		thyroglobulin [Source:HGNC Symbol;Acc:HGNC:11764]
ENSG00000042980	ADAM28	23.3634	-0.681802	0.412767	-1.65179	0.0985783	0.360954	Non-sig.		ADAM metallopeptidase domain 28 [Source:HGNC Symbol;Acc:HGNC:206]
ENSG00000043093	DCUN1D1	155.037	0.00302747	0.106168	0.0285159	0.977251	0.99381	Non-sig.		defective in cullin neddylation 1 domain containing 1 [Source:HGNC Symbol;Acc:HGNC:18184]
ENSG00000043143	JADE2	172.819	-0.244766	0.112654	-2.17272	0.0298011	0.17815	Non-sig.		jade family PHD finger 2 [Source:HGNC Symbol;Acc:HGNC:22984]
ENSG00000043462	LCP2	4.30553	1.15116	0.555491	2.07232	0.0382355	0.208602	Non-sig.		lymphocyte cytosolic protein 2 [Source:HGNC Symbol;Acc:HGNC:6529]
ENSG00000043514	TRIT1	100.701	0.0793227	0.169187	0.468846	0.63918	0.862611	Non-sig.		tRNA isopentenyltransferase 1 [Source:HGNC Symbol;Acc:HGNC:20286]
ENSG00000043591	ADRB1	85.7359	-0.668456	0.222832	-2.99982	0.00270142	0.0341202	Sig. genes		adrenoceptor beta 1 [Source:HGNC Symbol;Acc:HGNC:285]
ENSG00000044090	CUL7	62.8376	-0.0959479	0.153834	-0.623709	0.532819	0.809839	Non-sig.
ENSG00000044115	CTNNA1	677.405	-0.0426817	0.109964	-0.388143	0.69791	0.88769	Non-sig.		catenin alpha 1 [Source:HGNC Symbol;Acc:HGNC:2509]
ENSG00000044446	PHKA2	115.314	-0.0173801	0.136119	-0.127683	0.8984	0.966794	Non-sig.		phosphorylase kinase regulatory subunit alpha 2 [Source:HGNC Symbol;Acc:HGNC:8926]
ENSG00000044459	CNTLN	187.738	-0.149992	0.121369	-1.23583	0.216521	0.538703	Non-sig.		centlein [Source:HGNC Symbol;Acc:HGNC:23432]
ENSG00000044574	HSPA5	5064.11	0.246407	0.116415	2.11664	0.0342908	0.194474	Non-sig.		heat shock protein family A (Hsp70) member 5 [Source:HGNC Symbol;Acc:HGNC:5238]
ENSG00000046604	DSG2	38.2731	0.70088	0.371511	1.88657	0.0592188	0.272021	Non-sig.		desmoglein 2 [Source:HGNC Symbol;Acc:HGNC:3049]
ENSG00000046647	GEMIN8	72.5664	-0.014835	0.199097	-0.0745112	0.940604	0.982224	Non-sig.		gem nuclear organelle associated protein 8 [Source:HGNC Symbol;Acc:HGNC:26044]
ENSG00000046651	OFD1	313.064	-0.283356	0.131065	-2.16194	0.0306225	0.181365	Non-sig.		OFD1 centriole and centriolar satellite protein [Source:HGNC Symbol;Acc:HGNC:2567]
ENSG00000046653	GPM6B	26.6031	0.537296	0.460438	1.16693	0.243241	0.570561	Non-sig.		glycoprotein M6B [Source:HGNC Symbol;Acc:HGNC:4461]
ENSG00000046889	PREX2	55.2507	-0.168895	0.406429	-0.415558	0.677733	0.879476	Non-sig.		phosphatidylinositol-3,4,5-trisphosphate dependent Rac exchange factor 2 [Source:HGNC Symbol;Acc:HGNC:22950]
ENSG00000047056	WDR37	46.2405	-0.122607	0.182127	-0.673195	0.500823	0.789055	Non-sig.
ENSG00000047188	YTHDC2	129.023	-0.0576059	0.173535	-0.331955	0.739923	0.90699	Non-sig.		YTH domain containing 2 [Source:HGNC Symbol;Acc:HGNC:24721]
ENSG00000047230	CTPS2	69.5198	-0.0897567	0.142795	-0.628569	0.529631	0.807878	Non-sig.		CTP synthase 2 [Source:HGNC Symbol;Acc:HGNC:2520]
ENSG00000047249	ATP6V1H	170.086	-0.0103664	0.138715	-0.0747312	0.940429	0.982224	Non-sig.		ATPase H+ transporting V1 subunit H [Source:HGNC Symbol;Acc:HGNC:18303]
ENSG00000047315	POLR2B	243.345	-0.00187254	0.138381	-0.0135317	0.989204	0.997179	Non-sig.		RNA polymerase II subunit B [Source:HGNC Symbol;Acc:HGNC:9188]
ENSG00000047346	FAM214A	163.938	-0.266889	0.143472	-1.86022	0.062854	0.281243	Non-sig.		family with sequence similarity 214 member A [Source:HGNC Symbol;Acc:HGNC:25609]
ENSG00000047365	ARAP2	34.1323	1.56699	0.420276	3.72848	0.000192642	0.00449832	Sig. genes
ENSG00000047410	TPR	1408.93	-0.0528478	0.0666691	-0.792688	0.42796	0.738416	Non-sig.		translocated promoter region, nuclear basket protein [Source:HGNC Symbol;Acc:HGNC:12017]
ENSG00000047457	CP	443.89	0.48851	0.439757	1.11086	0.266628	0.596465	Non-sig.		ceruloplasmin [Source:HGNC Symbol;Acc:HGNC:2295]
ENSG00000047578	KATNIP	48.4106	0.257172	0.196125	1.31127	0.189767	0.506895	Non-sig.
ENSG00000047579	DTNBP1	195.512	-0.00266996	0.088442	-0.0301888	0.975916	0.99381	Non-sig.		dystrobrevin binding protein 1 [Source:HGNC Symbol;Acc:HGNC:17328]
ENSG00000047617	ANO2	4.29283	-0.468189	0.841914	-0.556101	0.578142	0.833161	Non-sig.
ENSG00000047621	C12orf4	58.9774	-0.065636	0.246865	-0.265878	0.790334	0.928741	Non-sig.		chromosome 12 open reading frame 4 [Source:HGNC Symbol;Acc:HGNC:1184]
ENSG00000047634	SCML1	71.6591	0.156513	0.144183	1.08552	0.277693	0.608898	Non-sig.		Scm polycomb group protein like 1 [Source:HGNC Symbol;Acc:HGNC:10580]
ENSG00000047644	WWC3	259.992	0.0312691	0.157787	0.198172	0.84291	0.947525	Non-sig.
ENSG00000047648	ARHGAP6	12.0037	0.296195	0.464149	0.638145	0.523379	0.803669	Non-sig.		Rho GTPase activating protein 6 [Source:HGNC Symbol;Acc:HGNC:676]
ENSG00000047662	FAM184B	5.01554	-0.409771	0.566537	-0.723292	0.469501	0.768964	Non-sig.		family with sequence similarity 184 member B [Source:HGNC Symbol;Acc:HGNC:29235]
ENSG00000047849	MAP4	751.804	0.289995	0.0791624	3.66328	0.000249002	0.00549044	Sig. genes		microtubule associated protein 4 [Source:HGNC Symbol;Acc:HGNC:6862]
ENSG00000047932	GOPC	281.207	0.0900247	0.0786851	1.14411	0.252576	0.580504	Non-sig.		golgi associated PDZ and coiled-coil motif containing [Source:HGNC Symbol;Acc:HGNC:17643]
ENSG00000048028	USP28	58.8517	0.243004	0.186014	1.30638	0.191424	0.507986	Non-sig.		ubiquitin specific peptidase 28 [Source:HGNC Symbol;Acc:HGNC:12625]
ENSG00000048052	HDAC9	60.8405	-0.423046	0.259055	-1.63304	0.102461	0.369306	Non-sig.
ENSG00000048140	TSPAN17	104.91	0.0987178	0.161319	0.611941	0.540577	0.813374	Non-sig.		tetraspanin 17 [Source:HGNC Symbol;Acc:HGNC:13594]
ENSG00000048162	NOP16	89.9151	0.16863	0.149246	1.12988	0.258526	0.587751	Non-sig.
ENSG00000048342	CC2D2A	194.38	-0.406208	0.19843	-2.04711	0.0406472	0.215957	Non-sig.		coiled-coil and C2 domain containing 2A [Source:HGNC Symbol;Acc:HGNC:29253]
ENSG00000048392	RRM2B	362.158	0.0643702	0.122225	0.526653	0.598435	0.84339	Non-sig.
ENSG00000048405	ZNF800	157.768	-0.230051	0.17541	-1.31151	0.189686	0.506754	Non-sig.
ENSG00000048471	SNX29	86.9356	-0.245786	0.190791	-1.28825	0.19766	0.516642	Non-sig.		sorting nexin 29 [Source:HGNC Symbol;Acc:HGNC:30542]
ENSG00000048540	LMO3	3.41836	-0.839935	0.742421	-1.13135	0.257909	0.58692	Non-sig.
ENSG00000048544	MRPS10	573.642	-0.243931	0.0816335	-2.98813	0.00280694	0.0350086	Sig. genes		mitochondrial ribosomal protein S10 [Source:HGNC Symbol;Acc:HGNC:14502]
ENSG00000048545	GUCA1A	3.33114	0.6766	0.918539	0.736605	0.461363	0.763392	Non-sig.		guanylate cyclase activator 1A [Source:HGNC Symbol;Acc:HGNC:4678]
ENSG00000048649	RSF1	962.269	-0.00893138	0.0902125	-0.0990038	0.921135	0.975724	Non-sig.		remodeling and spacing factor 1 [Source:HGNC Symbol;Acc:HGNC:18118]
ENSG00000048707	VPS13D	263.196	0.0051943	0.159462	0.0325738	0.974014	0.993541	Non-sig.		vacuolar protein sorting 13 homolog D [Source:HGNC Symbol;Acc:HGNC:23595]
ENSG00000048740	CELF2	265.32	0.428653	0.144867	2.95893	0.00308709	0.0373075	Sig. genes
ENSG00000048828	FAM120A	1306.85	-0.0608172	0.0738873	-0.823108	0.410447	0.724818	Non-sig.		family with sequence similarity 120A [Source:HGNC Symbol;Acc:HGNC:13247]
ENSG00000048991	R3HDM1	178.932	0.13945	0.222871	0.6257	0.531512	0.808783	Non-sig.		R3H domain containing 1 [Source:HGNC Symbol;Acc:HGNC:9757]
ENSG00000049089	COL9A2	4.10554	-0.754959	0.717503	-1.0522	0.292707	0.625116	Non-sig.		collagen type IX alpha 2 chain [Source:HGNC Symbol;Acc:HGNC:2218]
ENSG00000049130	KITLG	35.8814	0.411006	0.408393	1.0064	0.314224	0.645162	Non-sig.		KIT ligand [Source:HGNC Symbol;Acc:HGNC:6343]
ENSG00000049167	ERCC8	103.404	-0.0721104	0.151398	-0.476296	0.633864	0.859999	Non-sig.		ERCC excision repair 8, CSA ubiquitin ligase complex subunit [Source:HGNC Symbol;Acc:HGNC:3439]
ENSG00000049192	ADAMTS6	36.9319	1.53936	0.321331	4.79057	1.66308e-06	7.94289e-05	Sig. genes		ADAM metallopeptidase with thrombospondin type 1 motif 6 [Source:HGNC Symbol;Acc:HGNC:222]
ENSG00000049239	H6PD	348.206	0.0712174	0.119831	0.594317	0.5523	0.820042	Non-sig.		hexose-6-phosphate dehydrogenase/glucose 1-dehydrogenase [Source:HGNC Symbol;Acc:HGNC:4795]
ENSG00000049245	VAMP3	275.859	-0.0873001	0.126225	-0.691623	0.489174	0.781864	Non-sig.		vesicle associated membrane protein 3 [Source:HGNC Symbol;Acc:HGNC:12644]
ENSG00000049246	PER3	123.796	-0.497515	0.184628	-2.69469	0.00704544	0.0676738	Non-sig.		period circadian regulator 3 [Source:HGNC Symbol;Acc:HGNC:8847]
ENSG00000049249	TNFRSF9	3.42311	0.211783	0.843789	0.250991	0.801821	0.93234	Non-sig.		TNF receptor superfamily member 9 [Source:HGNC Symbol;Acc:HGNC:11924]
ENSG00000049283	EPN3	7.83325	-1.55552	0.757221	-2.05425	0.0399517	0.214296	Non-sig.
ENSG00000049323	LTBP1	72.9895	0.115348	0.308085	0.374404	0.708104	0.892229	Non-sig.		latent transforming growth factor beta binding protein 1 [Source:HGNC Symbol;Acc:HGNC:6714]
ENSG00000049449	RCN1	629.655	0.456043	0.0936092	4.87177	1.10602e-06	5.62749e-05	Sig. genes		reticulocalbin 1 [Source:HGNC Symbol;Acc:HGNC:9934]
ENSG00000049540	ELN	44.1325	1.86312	0.363561	5.12464	2.98102e-07	1.80372e-05	Sig. genes
ENSG00000049541	RFC2	52.5005	-0.0472604	0.187541	-0.252	0.801041	0.931967	Non-sig.		replication factor C subunit 2 [Source:HGNC Symbol;Acc:HGNC:9970]
ENSG00000049618	ARID1B	635.253	-0.0418837	0.101795	-0.411451	0.680742	0.880295	Non-sig.		AT-rich interaction domain 1B [Source:HGNC Symbol;Acc:HGNC:18040]
ENSG00000049656	CLPTM1L	456.915	0.0547737	0.0917714	0.59685	0.550608	0.818916	Non-sig.		CLPTM1 like [Source:HGNC Symbol;Acc:HGNC:24308]
ENSG00000049759	NEDD4L	297.525	-0.524698	0.212686	-2.46701	0.0136247	0.107214	Non-sig.		NEDD4 like E3 ubiquitin protein ligase [Source:HGNC Symbol;Acc:HGNC:7728]
ENSG00000049769	PPP1R3F	51.2211	-0.142984	0.244235	-0.585435	0.558255	0.8223	Non-sig.		protein phosphatase 1 regulatory subunit 3F [Source:HGNC Symbol;Acc:HGNC:14944]
ENSG00000049860	HEXB	654.905	0.335035	0.100331	3.33929	0.000839931	0.0139677	Sig. genes		hexosaminidase subunit beta [Source:HGNC Symbol;Acc:HGNC:4879]
ENSG00000049883	PTCD2	77.2775	-0.325292	0.220732	-1.4737	0.140563	0.436232	Non-sig.		pentatricopeptide repeat domain 2 [Source:HGNC Symbol;Acc:HGNC:25734]
ENSG00000050030	NEXMIF	11.6581	0.398559	0.449712	0.886255	0.37548	0.699517	Non-sig.		neurite extension and migration factor [Source:HGNC Symbol;Acc:HGNC:29433]
ENSG00000050130	JKAMP	97.5002	0.242279	0.185233	1.30797	0.190884	0.507979	Non-sig.		JNK1/MAPK8 associated membrane protein [Source:HGNC Symbol;Acc:HGNC:20184]
ENSG00000050165	DKK3	927.788	0.414783	0.123663	3.35414	0.000796125	0.0134009	Sig. genes		dickkopf WNT signaling pathway inhibitor 3 [Source:HGNC Symbol;Acc:HGNC:2893]
ENSG00000050327	ARHGEF5	79.7531	-0.336088	0.223384	-1.50453	0.132445	0.424268	Non-sig.		Rho guanine nucleotide exchange factor 5 [Source:HGNC Symbol;Acc:HGNC:13209]
ENSG00000050393	MCUR1	140.301	0.160413	0.153112	1.04768	0.294784	0.626731	Non-sig.
ENSG00000050405	LIMA1	1164.3	0.330911	0.153864	2.15067	0.0315024	0.184081	Non-sig.
ENSG00000050426	LETMD1	104.199	-0.0779775	0.123033	-0.633795	0.526214	0.805548	Non-sig.		LETM1 domain containing 1 [Source:HGNC Symbol;Acc:HGNC:24241]
ENSG00000050438	SLC4A8	25.081	-0.326453	0.44499	-0.733617	0.463182	0.764088	Non-sig.		solute carrier family 4 member 8 [Source:HGNC Symbol;Acc:HGNC:11034]
ENSG00000050555	LAMC3	4.21963	0.546274	0.594027	0.919611	0.357776	0.684444	Non-sig.		laminin subunit gamma 3 [Source:HGNC Symbol;Acc:HGNC:6494]
ENSG00000050730	TNIP3	23.3488	-0.427625	0.335109	-1.27608	0.201928	0.522024	Non-sig.		TNFAIP3 interacting protein 3 [Source:HGNC Symbol;Acc:HGNC:19315]
ENSG00000050748	MAPK9	71.9592	-0.0698332	0.179743	-0.388516	0.697634	0.887501	Non-sig.		mitogen-activated protein kinase 9 [Source:HGNC Symbol;Acc:HGNC:6886]
ENSG00000050767	COL23A1	4.35194	0.0800824	0.808114	0.0990979	0.921061	0.975702	Non-sig.		collagen type XXIII alpha 1 chain [Source:HGNC Symbol;Acc:HGNC:22990]
ENSG00000050820	BCAR1	233.51	-0.0645445	0.0807418	-0.799394	0.424062	0.735019	Non-sig.		BCAR1 scaffold protein, Cas family member [Source:HGNC Symbol;Acc:HGNC:971]
ENSG00000051009	FAM160A2	50.2338	-0.0238252	0.163481	-0.145737	0.884129	0.961519	Non-sig.		FHF complex subunit HOOK interacting protein 1B [Source:HGNC Symbol;Acc:HGNC:25378]
ENSG00000051108	HERPUD1	614.937	0.362699	0.0978594	3.70633	0.000210284	0.00481384	Sig. genes		homocysteine inducible ER protein with ubiquitin like domain 1 [Source:HGNC Symbol;Acc:HGNC:13744]
ENSG00000051128	HOMER3	454.805	0.201723	0.0998673	2.01991	0.0433928	0.224152	Non-sig.		homer scaffold protein 3 [Source:HGNC Symbol;Acc:HGNC:17514]
ENSG00000051180	RAD51	3.75908	0.545999	0.719204	0.759171	0.44775	0.753288	Non-sig.		RAD51 recombinase [Source:HGNC Symbol;Acc:HGNC:9817]
ENSG00000051341	POLQ	22.1065	-0.711773	0.745576	-0.954662	0.339749	0.668524	Non-sig.		DNA polymerase theta [Source:HGNC Symbol;Acc:HGNC:9186]
ENSG00000051382	PIK3CB	87.7558	-0.11961	0.223128	-0.536058	0.591919	0.84037	Non-sig.		phosphatidylinositol-4,5-bisphosphate 3-kinase catalytic subunit beta [Source:HGNC Symbol;Acc:HGNC:8976]
ENSG00000051523	CYBA	56.2287	0.0869546	0.128931	0.674427	0.50004	0.788811	Non-sig.
ENSG00000051596	THOC3	18.5723	-0.414102	0.33149	-1.24921	0.211587	0.532312	Non-sig.		THO complex 3 [Source:HGNC Symbol;Acc:HGNC:19072]
ENSG00000051620	HEBP2	675.544	0.0351856	0.0841185	0.418287	0.675738	0.878288	Non-sig.		heme binding protein 2 [Source:HGNC Symbol;Acc:HGNC:15716]
ENSG00000051825	MPHOSPH9	90.9192	-0.052538	0.241552	-0.217501	0.827818	0.94252	Non-sig.		M-phase phosphoprotein 9 [Source:HGNC Symbol;Acc:HGNC:7215]
ENSG00000052126	PLEKHA5	157.916	0.123754	0.15299	0.808904	0.41857	0.730052	Non-sig.		pleckstrin homology domain containing A5 [Source:HGNC Symbol;Acc:HGNC:30036]
ENSG00000052344	PRSS8	45.5462	0.515209	0.218594	2.35692	0.0184271	0.132133	Non-sig.		serine protease 8 [Source:HGNC Symbol;Acc:HGNC:9491]
ENSG00000052723	SIKE1	93.5534	-0.378544	0.260415	-1.45362	0.146052	0.44638	Non-sig.		suppressor of IKBKE 1 [Source:HGNC Symbol;Acc:HGNC:26119]
ENSG00000052749	RRP12	144.189	0.0579174	0.147263	0.393294	0.694103	0.886396	Non-sig.		ribosomal RNA processing 12 homolog [Source:HGNC Symbol;Acc:HGNC:29100]
ENSG00000052795	FNIP2	240.244	0.241598	0.137586	1.75598	0.079092	0.319328	Non-sig.		folliculin interacting protein 2 [Source:HGNC Symbol;Acc:HGNC:29280]
ENSG00000052802	MSMO1	366.587	0.159302	0.130307	1.22251	0.221514	0.546177	Non-sig.		methylsterol monooxygenase 1 [Source:HGNC Symbol;Acc:HGNC:10545]
ENSG00000052841	TTC17	620.375	0.109185	0.111172	0.982128	0.326037	0.655961	Non-sig.		tetratricopeptide repeat domain 17 [Source:HGNC Symbol;Acc:HGNC:25596]
ENSG00000052850	ALX4	115.722	-0.558534	0.158056	-3.53377	0.000409679	0.00798406	Sig. genes		ALX homeobox 4 [Source:HGNC Symbol;Acc:HGNC:450]
ENSG00000053254	FOXN3	1030.19	0.208658	0.130089	1.60396	0.108724	0.381886	Non-sig.		forkhead box N3 [Source:HGNC Symbol;Acc:HGNC:1928]
ENSG00000053328	METTL24	14.0029	-1.22803	0.431487	-2.84605	0.00442656	0.0486976	Sig. genes		methyltransferase like 24 [Source:HGNC Symbol;Acc:HGNC:21566]
ENSG00000053371	AKR7A2	142.639	-0.294579	0.118513	-2.48563	0.0129323	0.103403	Non-sig.		aldo-keto reductase family 7 member A2 [Source:HGNC Symbol;Acc:HGNC:389]
ENSG00000053372	MRTO4	219.837	0.102175	0.104686	0.976012	0.329059	0.658044	Non-sig.		MRT4 homolog, ribosome maturation factor [Source:HGNC Symbol;Acc:HGNC:18477]
ENSG00000053438	NNAT	18.6925	-0.824322	0.298098	-2.76527	0.00568756	0.0587114	Non-sig.		neuronatin [Source:HGNC Symbol;Acc:HGNC:7860]
ENSG00000053501	USE1	61.8014	-0.226946	0.200399	-1.13247	0.257436	0.586452	Non-sig.
ENSG00000053524	MCF2L2	51.6352	-0.322188	0.317959	-1.0133	0.310916	0.642629	Non-sig.		MCF.2 cell line derived transforming sequence-like 2 [Source:HGNC Symbol;Acc:HGNC:30319]
ENSG00000053747	LAMA3	31.8007	0.91934	0.640703	1.43489	0.151318	0.454791	Non-sig.		laminin subunit alpha 3 [Source:HGNC Symbol;Acc:HGNC:6483]
ENSG00000053770	AP5M1	151.332	0.0530857	0.123649	0.429325	0.667686	0.87572	Non-sig.		adaptor related protein complex 5 subunit mu 1 [Source:HGNC Symbol;Acc:HGNC:20192]
ENSG00000053900	ANAPC4	89.1532	-0.339676	0.160855	-2.11169	0.034713	0.196061	Non-sig.		anaphase promoting complex subunit 4 [Source:HGNC Symbol;Acc:HGNC:19990]
ENSG00000053918	KCNQ1	15.534	-0.369547	0.283712	-1.30254	0.192731	0.509957	Non-sig.		potassium voltage-gated channel subfamily Q member 1 [Source:HGNC Symbol;Acc:HGNC:6294]
ENSG00000054116	TRAPPC3	848.08	-0.0171335	0.0693612	-0.247018	0.804894	0.933418	Non-sig.		trafficking protein particle complex subunit 3 [Source:HGNC Symbol;Acc:HGNC:19942]
ENSG00000054118	THRAP3	848.241	-0.0552782	0.0560272	-0.986632	0.323823	0.653779	Non-sig.		thyroid hormone receptor associated protein 3 [Source:HGNC Symbol;Acc:HGNC:22964]
ENSG00000054148	PHPT1	475.256	-0.132756	0.0827978	-1.60338	0.108851	0.382169	Non-sig.		phosphohistidine phosphatase 1 [Source:HGNC Symbol;Acc:HGNC:30033]
ENSG00000054219	LY75	58.0264	-0.741503	0.238653	-3.10704	0.00188971	0.0261754	Sig. genes		lymphocyte antigen 75 [Source:HGNC Symbol;Acc:HGNC:6729]
ENSG00000054267	ARID4B	739.896	-0.197996	0.0973178	-2.03453	0.0418981	0.219928	Non-sig.		AT-rich interaction domain 4B [Source:HGNC Symbol;Acc:HGNC:15550]
ENSG00000054277	OPN3	180.421	0.72098	0.174719	4.12651	3.68315e-05	0.00119071	Sig. genes		opsin 3 [Source:HGNC Symbol;Acc:HGNC:14007]
ENSG00000054282	SDCCAG8	441.376	-0.107619	0.106788	-1.00778	0.313559	0.644833	Non-sig.		SHH signaling and ciliogenesis regulator SDCCAG8 [Source:HGNC Symbol;Acc:HGNC:10671]
ENSG00000054392	HHAT	30.0598	0.94121	0.329064	2.86026	0.00423291	0.0470586	Sig. genes		hedgehog acyltransferase [Source:HGNC Symbol;Acc:HGNC:18270]
ENSG00000054523	KIF1B	359.168	-0.00636752	0.144247	-0.0441431	0.96479	0.991409	Non-sig.
ENSG00000054598	FOXC1	2924.43	-0.207374	0.0855297	-2.42459	0.0153258	0.116973	Non-sig.		forkhead box C1 [Source:HGNC Symbol;Acc:HGNC:3800]
ENSG00000054611	TBC1D22A	143.631	-0.0548679	0.108414	-0.506095	0.61279	0.850136	Non-sig.		TBC1 domain family member 22A [Source:HGNC Symbol;Acc:HGNC:1309]
ENSG00000054654	SYNE2	1684.49	-0.739666	0.141097	-5.24225	1.58634e-07	1.04839e-05	Sig. genes
ENSG00000054690	PLEKHH1	91.4247	-1.17295	0.154337	-7.59992	2.96314e-14	8.29217e-12	Sig. genes		pleckstrin homology, MyTH4 and FERM domain containing H1 [Source:HGNC Symbol;Acc:HGNC:17733]
ENSG00000054793	ATP9A	166.585	0.413391	0.103463	3.99554	6.4548e-05	0.00188898	Sig. genes		ATPase phospholipid transporting 9A (putative) [Source:HGNC Symbol;Acc:HGNC:13540]
ENSG00000054938	CHRDL2	10.3018	-0.249342	0.779582	-0.319841	0.749089	0.911921	Non-sig.
ENSG00000054965	FAM168A	57.8226	-0.233721	0.233904	-0.999217	0.31769	0.6487	Non-sig.		family with sequence similarity 168 member A [Source:HGNC Symbol;Acc:HGNC:28999]
ENSG00000054967	RELT	31.3617	0.223498	0.178818	1.24986	0.21135	0.531987	Non-sig.		RELT TNF receptor [Source:HGNC Symbol;Acc:HGNC:13764]
ENSG00000054983	GALC	181.604	0.182678	0.140116	1.30377	0.192312	0.509288	Non-sig.		galactosylceramidase [Source:HGNC Symbol;Acc:HGNC:4115]
ENSG00000055044	NOP58	331.121	0.0124179	0.109087	0.113834	0.909369	0.97223	Non-sig.		NOP58 ribonucleoprotein [Source:HGNC Symbol;Acc:HGNC:29926]
ENSG00000055070	SZRD1	261.409	0.0655051	0.0939633	0.697135	0.485718	0.77985	Non-sig.		SUZ RNA binding domain containing 1 [Source:HGNC Symbol;Acc:HGNC:30232]
ENSG00000055130	CUL1	296.618	0.0188785	0.078563	0.240297	0.8101	0.934971	Non-sig.
ENSG00000055147	FAM114A2	117.695	-0.194552	0.176451	-1.10258	0.270209	0.600278	Non-sig.		family with sequence similarity 114 member A2 [Source:HGNC Symbol;Acc:HGNC:1333]
ENSG00000055163	CYFIP2	235.516	-0.259121	0.137104	-1.88995	0.0587643	0.270557	Non-sig.		cytoplasmic FMR1 interacting protein 2 [Source:HGNC Symbol;Acc:HGNC:13760]
ENSG00000055208	TAB2	218.391	-0.00524653	0.090203	-0.0581635	0.953618	0.987186	Non-sig.		TGF-beta activated kinase 1 (MAP3K7) binding protein 2 [Source:HGNC Symbol;Acc:HGNC:17075]
ENSG00000055211	GINM1	655.808	0.148396	0.0600224	2.47234	0.0134231	0.106094	Non-sig.		glycoprotein integral membrane 1 [Source:HGNC Symbol;Acc:HGNC:21074]
ENSG00000055332	EIF2AK2	731.383	-0.035874	0.104839	-0.342181	0.732215	0.904536	Non-sig.		eukaryotic translation initiation factor 2 alpha kinase 2 [Source:HGNC Symbol;Acc:HGNC:9437]
ENSG00000055483	USP36	405.917	0.0659063	0.121862	0.540825	0.588628	0.838748	Non-sig.
ENSG00000055609	KMT2C	835.073	-0.149455	0.153806	-0.971711	0.331194	0.660766	Non-sig.		lysine methyltransferase 2C [Source:HGNC Symbol;Acc:HGNC:13726]
ENSG00000055732	MCOLN3	54.2711	0.584069	0.265233	2.2021	0.0276584	0.170111	Non-sig.		mucolipin TRP cation channel 3 [Source:HGNC Symbol;Acc:HGNC:13358]
ENSG00000055917	PUM2	274.013	0.000896893	0.0824892	0.0108729	0.991325	0.997859	Non-sig.		pumilio RNA binding family member 2 [Source:HGNC Symbol;Acc:HGNC:14958]
ENSG00000055950	MRPL43	236.655	-0.00636363	0.114921	-0.0553741	0.95584	0.988012	Non-sig.
ENSG00000055955	ITIH4	25.1326	-0.351576	0.247878	-1.41835	0.15609	0.461977	Non-sig.		inter-alpha-trypsin inhibitor heavy chain 4 [Source:HGNC Symbol;Acc:HGNC:6169]
ENSG00000056050	HPF1	140.965	0.0401242	0.110173	0.364192	0.715714	0.895363	Non-sig.		histone PARylation factor 1 [Source:HGNC Symbol;Acc:HGNC:26051]
ENSG00000056097	ZFR	841.997	0.0308125	0.0598156	0.515125	0.606466	0.84715	Non-sig.		zinc finger RNA binding protein [Source:HGNC Symbol;Acc:HGNC:17277]
ENSG00000056277	ZNF280C	18.2967	-0.390911	0.402152	-0.972048	0.331027	0.660578	Non-sig.		zinc finger protein 280C [Source:HGNC Symbol;Acc:HGNC:25955]
ENSG00000056487	PHF21B	12.9308	-1.02502	0.492545	-2.08107	0.0374279	0.205687	Non-sig.		PHD finger protein 21B [Source:HGNC Symbol;Acc:HGNC:25161]
ENSG00000056558	TRAF1	18.8796	0.0869803	0.292823	0.297041	0.766435	0.918922	Non-sig.		TNF receptor associated factor 1 [Source:HGNC Symbol;Acc:HGNC:12031]
ENSG00000056586	RC3H2	306.366	-0.0454474	0.139772	-0.325153	0.745065	0.90993	Non-sig.		ring finger and CCCH-type domains 2 [Source:HGNC Symbol;Acc:HGNC:21461]
ENSG00000056736	IL17RB	10.7757	0.209429	0.444068	0.471614	0.637202	0.861925	Non-sig.		interleukin 17 receptor B [Source:HGNC Symbol;Acc:HGNC:18015]
ENSG00000056972	TRAF3IP2	290.494	0.101576	0.090147	1.12678	0.259835	0.589368	Non-sig.		TRAF3 interacting protein 2 [Source:HGNC Symbol;Acc:HGNC:1343]
ENSG00000056998	GYG2	42.9675	-0.327875	0.203477	-1.61136	0.107101	0.378787	Non-sig.		glycogenin 2 [Source:HGNC Symbol;Acc:HGNC:4700]
ENSG00000057019	DCBLD2	287.417	0.587566	0.171511	3.42581	0.000612963	0.0109019	Sig. genes		discoidin, CUB and LCCL domain containing 2 [Source:HGNC Symbol;Acc:HGNC:24627]
ENSG00000057252	SOAT1	66.5465	-0.0972639	0.144214	-0.674441	0.500031	0.788811	Non-sig.		sterol O-acyltransferase 1 [Source:HGNC Symbol;Acc:HGNC:11177]
ENSG00000057294	PKP2	19.5169	0.686228	0.27885	2.46092	0.0138581	0.108621	Non-sig.		plakophilin 2 [Source:HGNC Symbol;Acc:HGNC:9024]
ENSG00000057608	GDI2	518.464	0.18518	0.0816234	2.26871	0.0232858	0.151489	Non-sig.		GDP dissociation inhibitor 2 [Source:HGNC Symbol;Acc:HGNC:4227]
ENSG00000057657	PRDM1	9.90042	0.387926	0.685726	0.565717	0.571586	0.829339	Non-sig.		PR/SET domain 1 [Source:HGNC Symbol;Acc:HGNC:9346]
ENSG00000057663	ATG5	90.5614	0.297347	0.169852	1.75063	0.0800099	0.321873	Non-sig.		autophagy related 5 [Source:HGNC Symbol;Acc:HGNC:589]
ENSG00000057704	TMCC3	84.2036	-0.188507	0.253198	-0.744506	0.45657	0.760007	Non-sig.		transmembrane and coiled-coil domain family 3 [Source:HGNC Symbol;Acc:HGNC:29199]
ENSG00000057757	PITHD1	211.224	0.113392	0.0900573	1.25911	0.20799	0.528832	Non-sig.		PITH domain containing 1 [Source:HGNC Symbol;Acc:HGNC:25022]
ENSG00000057935	MTA3	93.2343	0.150419	0.127777	1.1772	0.239117	0.566856	Non-sig.		metastasis associated 1 family member 3 [Source:HGNC Symbol;Acc:HGNC:23784]
ENSG00000058056	USP13	78.2774	0.225674	0.37396	0.603469	0.546196	0.816496	Non-sig.		ubiquitin specific peptidase 13 [Source:HGNC Symbol;Acc:HGNC:12611]
ENSG00000058063	ATP11B	157.546	0.0541806	0.172129	0.314767	0.752938	0.913094	Non-sig.		ATPase phospholipid transporting 11B (putative) [Source:HGNC Symbol;Acc:HGNC:13553]
ENSG00000058085	LAMC2	510.437	0.979015	0.228769	4.27949	1.87326e-05	0.000661738	Sig. genes		laminin subunit gamma 2 [Source:HGNC Symbol;Acc:HGNC:6493]
ENSG00000058091	CDK14	506.937	0.353613	0.164822	2.14543	0.0319186	0.185846	Non-sig.		cyclin dependent kinase 14 [Source:HGNC Symbol;Acc:HGNC:8883]
ENSG00000058262	SEC61A1	489.176	0.160476	0.0918926	1.74635	0.0807509	0.323763	Non-sig.		SEC61 translocon subunit alpha 1 [Source:HGNC Symbol;Acc:HGNC:18276]
ENSG00000058272	PPP1R12A	703.215	0.0370718	0.0814821	0.454969	0.649132	0.867587	Non-sig.		protein phosphatase 1 regulatory subunit 12A [Source:HGNC Symbol;Acc:HGNC:7618]
ENSG00000058335	RASGRF1	5.28167	-0.691806	0.704426	-0.982086	0.326058	0.655961	Non-sig.		Ras protein specific guanine nucleotide releasing factor 1 [Source:HGNC Symbol;Acc:HGNC:9875]
ENSG00000058404	CAMK2B	8.89918	-0.253776	0.43153	-0.588084	0.556476	0.82103	Non-sig.		calcium/calmodulin dependent protein kinase II beta [Source:HGNC Symbol;Acc:HGNC:1461]
ENSG00000058453	CROCC	65.3184	0.168404	0.144283	1.16717	0.24314	0.570456	Non-sig.		ciliary rootlet coiled-coil, rootletin [Source:HGNC Symbol;Acc:HGNC:21299]
ENSG00000058600	POLR3E	99.0019	0.0241069	0.124942	0.192945	0.847002	0.94883	Non-sig.		RNA polymerase III subunit E [Source:HGNC Symbol;Acc:HGNC:30347]
ENSG00000058668	ATP2B4	579.271	-0.251319	0.103745	-2.42246	0.0154158	0.117388	Non-sig.		ATPase plasma membrane Ca2+ transporting 4 [Source:HGNC Symbol;Acc:HGNC:817]
ENSG00000058673	ZC3H11A	583.26	-0.0288729	0.104317	-0.276779	0.78195	0.925069	Non-sig.		zinc finger CCCH-type containing 11A [Source:HGNC Symbol;Acc:HGNC:29093]
ENSG00000058729	RIOK2	70.5508	-0.794155	0.304507	-2.608	0.00910724	0.0811496	Non-sig.		RIO kinase 2 [Source:HGNC Symbol;Acc:HGNC:18999]
ENSG00000058799	YIPF1	107.378	-0.109281	0.1104	-0.989871	0.322237	0.65249	Non-sig.		Yip1 domain family member 1 [Source:HGNC Symbol;Acc:HGNC:25231]
ENSG00000058804	NDC1	74.0126	0.179413	0.146801	1.22215	0.221652	0.546351	Non-sig.		NDC1 transmembrane nucleoporin [Source:HGNC Symbol;Acc:HGNC:25525]
ENSG00000058866	DGKG	11.8298	-0.497371	0.609903	-0.815492	0.41479	0.727354	Non-sig.		diacylglycerol kinase gamma [Source:HGNC Symbol;Acc:HGNC:2853]
ENSG00000059122	FLYWCH1	129.862	0.239629	0.134275	1.78461	0.0743252	0.308283	Non-sig.		FLYWCH-type zinc finger 1 [Source:HGNC Symbol;Acc:HGNC:25404]
ENSG00000059145	UNKL	156.034	0.5167	0.132044	3.91309	9.11231e-05	0.00244703	Sig. genes		unk like zinc finger [Source:HGNC Symbol;Acc:HGNC:14184]
ENSG00000059377	TBXAS1	8.50117	-0.919544	0.545187	-1.68666	0.091669	0.34769	Non-sig.		thromboxane A synthase 1 [Source:HGNC Symbol;Acc:HGNC:11609]
ENSG00000059378	PARP12	49.307	-0.0955763	0.200548	-0.476576	0.633664	0.859961	Non-sig.		poly(ADP-ribose) polymerase family member 12 [Source:HGNC Symbol;Acc:HGNC:21919]
ENSG00000059573	ALDH18A1	131.191	0.258341	0.12518	2.06376	0.0390404	0.211115	Non-sig.		aldehyde dehydrogenase 18 family member A1 [Source:HGNC Symbol;Acc:HGNC:9722]
ENSG00000059588	TARBP1	86.2672	-0.440445	0.338168	-1.30244	0.192764	0.509957	Non-sig.		TAR (HIV-1) RNA binding protein 1 [Source:HGNC Symbol;Acc:HGNC:11568]
ENSG00000059691	GATB	51.147	-0.274941	0.163239	-1.68428	0.0921268	0.347889	Non-sig.		glutamyl-tRNA amidotransferase subunit B [Source:HGNC Symbol;Acc:HGNC:8849]
ENSG00000059728	MXD1	62.8945	0.696856	0.240583	2.89653	0.00377315	0.0433742	Sig. genes		MAX dimerization protein 1 [Source:HGNC Symbol;Acc:HGNC:6761]
ENSG00000059758	CDK17	95.9429	0.338829	0.193745	1.74884	0.080318	0.322618	Non-sig.		cyclin dependent kinase 17 [Source:HGNC Symbol;Acc:HGNC:8750]
ENSG00000059769	DNAJC25	176.899	0.0183886	0.0914314	0.201119	0.840605	0.946573	Non-sig.		DnaJ heat shock protein family (Hsp40) member C25 [Source:HGNC Symbol;Acc:HGNC:34187]
ENSG00000059804	SLC2A3	554.867	1.03159	0.169595	6.08269	1.18181e-09	1.34817e-07	Sig. genes		solute carrier family 2 member 3 [Source:HGNC Symbol;Acc:HGNC:11007]
ENSG00000059915	PSD	11.2589	0.378336	0.415809	0.909879	0.362886	0.687807	Non-sig.		pleckstrin and Sec7 domain containing [Source:HGNC Symbol;Acc:HGNC:9507]
ENSG00000060069	CTDP1	46.6072	0.159888	0.187576	0.852394	0.393995	0.713783	Non-sig.		CTD phosphatase subunit 1 [Source:HGNC Symbol;Acc:HGNC:2498]
ENSG00000060138	YBX3	1238.57	0.0187519	0.144603	0.129679	0.89682	0.966081	Non-sig.		Y-box binding protein 3 [Source:HGNC Symbol;Acc:HGNC:2428]
ENSG00000060237	WNK1	1273.56	0.200764	0.0972304	2.06483	0.0389393	0.21085	Non-sig.		WNK lysine deficient protein kinase 1 [Source:HGNC Symbol;Acc:HGNC:14540]
ENSG00000060303	RPS17P5	9.25653	0.350832	0.432999	0.810236	0.417804	0.72969	Non-sig.		ribosomal protein S17 pseudogene 5 [Source:HGNC Symbol;Acc:HGNC:21352]
ENSG00000060339	CCAR1	774.128	-0.0551506	0.123833	-0.445363	0.656058	0.870195	Non-sig.		cell division cycle and apoptosis regulator 1 [Source:HGNC Symbol;Acc:HGNC:24236]
ENSG00000060491	OGFR	95.7953	0.00101943	0.120827	0.0084371	0.993268	0.998369	Non-sig.		opioid growth factor receptor [Source:HGNC Symbol;Acc:HGNC:15768]
ENSG00000060558	GNA15	23.2004	0.817596	0.464106	1.76166	0.078127	0.316645	Non-sig.		G protein subunit alpha 15 [Source:HGNC Symbol;Acc:HGNC:4383]
ENSG00000060642	PIGV	52.8652	-0.0173545	0.216869	-0.080023	0.936219	0.980413	Non-sig.
ENSG00000060656	PTPRU	660.385	-0.12861	0.106164	-1.21143	0.22573	0.551175	Non-sig.		protein tyrosine phosphatase receptor type U [Source:HGNC Symbol;Acc:HGNC:9683]
ENSG00000060688	SNRNP40	26.8934	-0.201873	0.260488	-0.77498	0.438352	0.747489	Non-sig.		small nuclear ribonucleoprotein U5 subunit 40 [Source:HGNC Symbol;Acc:HGNC:30857]
ENSG00000060709	RIMBP2	34.2655	-0.556209	0.360747	-1.54183	0.123116	0.40903	Non-sig.
ENSG00000060718	COL11A1	10.4017	2.15021	0.663464	3.24089	0.00119159	0.0182405	Sig. genes		collagen type XI alpha 1 chain [Source:HGNC Symbol;Acc:HGNC:2186]
ENSG00000060749	QSER1	265.55	-0.118119	0.141994	-0.831859	0.405489	0.721382	Non-sig.		glutamine and serine rich 1 [Source:HGNC Symbol;Acc:HGNC:26154]
ENSG00000060762	MPC1	194.428	-0.123212	0.0996847	-1.23601	0.216454	0.538703	Non-sig.		mitochondrial pyruvate carrier 1 [Source:HGNC Symbol;Acc:HGNC:21606]
ENSG00000060971	ACAA1	183.935	-0.319084	0.133293	-2.39386	0.0166722	0.123888	Non-sig.		acetyl-CoA acyltransferase 1 [Source:HGNC Symbol;Acc:HGNC:82]
ENSG00000060982	BCAT1	42.9081	0.671979	0.33247	2.02117	0.0432623	0.223704	Non-sig.		branched chain amino acid transaminase 1 [Source:HGNC Symbol;Acc:HGNC:976]
ENSG00000061273	HDAC7	556.161	0.0527898	0.098651	0.535117	0.592569	0.840511	Non-sig.		histone deacetylase 7 [Source:HGNC Symbol;Acc:HGNC:14067]
ENSG00000061337	LZTS1	32.8955	-0.0893776	0.284797	-0.31383	0.75365	0.913315	Non-sig.		leucine zipper tumor suppressor 1 [Source:HGNC Symbol;Acc:HGNC:13861]
ENSG00000061455	PRDM6	38.2332	0.1135	0.292535	0.387988	0.698025	0.887749	Non-sig.		PR/SET domain 6 [Source:HGNC Symbol;Acc:HGNC:9350]
ENSG00000061656	SPAG4	23.1904	0.170368	0.289342	0.588813	0.555987	0.820885	Non-sig.		sperm associated antigen 4 [Source:HGNC Symbol;Acc:HGNC:11214]
ENSG00000061676	NCKAP1	507.707	0.0288946	0.130394	0.221594	0.82463	0.940959	Non-sig.		NCK associated protein 1 [Source:HGNC Symbol;Acc:HGNC:7666]
ENSG00000061794	MRPS35	172.561	-0.0126655	0.132786	-0.0953832	0.92401	0.976704	Non-sig.		mitochondrial ribosomal protein S35 [Source:HGNC Symbol;Acc:HGNC:16635]
ENSG00000061918	GUCY1B1	45.8957	0.448097	0.3239	1.38344	0.166529	0.47652	Non-sig.		guanylate cyclase 1 soluble subunit beta 1 [Source:HGNC Symbol;Acc:HGNC:4687]
ENSG00000061936	SFSWAP	418.923	0.0963231	0.248925	0.386956	0.698789	0.887989	Non-sig.		splicing factor SWAP [Source:HGNC Symbol;Acc:HGNC:10790]
ENSG00000061938	TNK2	249.248	-0.190236	0.090518	-2.10164	0.0355851	0.199415	Non-sig.		tyrosine kinase non receptor 2 [Source:HGNC Symbol;Acc:HGNC:19297]
ENSG00000061987	MON2	124.854	-0.366083	0.202106	-1.81134	0.0700882	0.298659	Non-sig.		MON2 homolog, regulator of endosome-to-Golgi trafficking [Source:HGNC Symbol;Acc:HGNC:29177]
ENSG00000062038	CDH3	52.5292	-0.0230146	0.347679	-0.0661949	0.947223	0.984549	Non-sig.		cadherin 3 [Source:HGNC Symbol;Acc:HGNC:1762]
ENSG00000062194	GPBP1	405.509	-0.115473	0.0995121	-1.16039	0.245891	0.573052	Non-sig.		GC-rich promoter binding protein 1 [Source:HGNC Symbol;Acc:HGNC:29520]
ENSG00000062282	DGAT2	13.0353	0.310628	0.353467	0.878803	0.379508	0.702967	Non-sig.		diacylglycerol O-acyltransferase 2 [Source:HGNC Symbol;Acc:HGNC:16940]
ENSG00000062370	ZNF112	25.76	1.08341	0.532323	2.03524	0.0418266	0.219784	Non-sig.		zinc finger protein 112 [Source:HGNC Symbol;Acc:HGNC:12892]
ENSG00000062485	CS	243.569	-0.262016	0.114417	-2.29001	0.022021	0.146608	Non-sig.		citrate synthase [Source:HGNC Symbol;Acc:HGNC:2422]
ENSG00000062582	MRPS24	485.366	-0.12878	0.090939	-1.41612	0.156741	0.462628	Non-sig.		mitochondrial ribosomal protein S24 [Source:HGNC Symbol;Acc:HGNC:14510]
ENSG00000062598	ELMO2	102.56	-0.22801	0.148298	-1.53751	0.124168	0.410736	Non-sig.		engulfment and cell motility 2 [Source:HGNC Symbol;Acc:HGNC:17233]
ENSG00000062650	WAPL	303.601	0.138292	0.096369	1.43503	0.151279	0.454752	Non-sig.		WAPL cohesin release factor [Source:HGNC Symbol;Acc:HGNC:23293]
ENSG00000062716	VMP1	703.673	0.702649	0.135893	5.17059	2.33359e-07	1.46135e-05	Sig. genes		vacuole membrane protein 1 [Source:HGNC Symbol;Acc:HGNC:29559]
ENSG00000062725	APPBP2	198.641	0.0335403	0.0819605	0.409225	0.682374	0.881134	Non-sig.		amyloid beta precursor protein binding protein 2 [Source:HGNC Symbol;Acc:HGNC:622]
ENSG00000062822	POLD1	15.049	0.0143597	0.354629	0.0404921	0.967701	0.991808	Non-sig.
ENSG00000063015	SEZ6	3.28318	0.554597	0.758101	0.731561	0.464437	0.765513	Non-sig.
ENSG00000063046	EIF4B	1016.89	0.0891527	0.0631762	1.41118	0.158193	0.465059	Non-sig.		eukaryotic translation initiation factor 4B [Source:HGNC Symbol;Acc:HGNC:3285]
ENSG00000063127	SLC6A16	28.6816	0.44478	0.424312	1.04824	0.294528	0.62655	Non-sig.		solute carrier family 6 member 16 [Source:HGNC Symbol;Acc:HGNC:13622]
ENSG00000063169	BICRA	21.8285	0.481449	0.309915	1.55349	0.120307	0.403727	Non-sig.
ENSG00000063176	SPHK2	80.4444	-0.383986	0.152449	-2.51879	0.011776	0.0968802	Non-sig.		sphingosine kinase 2 [Source:HGNC Symbol;Acc:HGNC:18859]
ENSG00000063177	RPL18	5232.62	0.136199	0.0672728	2.02457	0.0429111	0.223124	Non-sig.		ribosomal protein L18 [Source:HGNC Symbol;Acc:HGNC:10310]
ENSG00000063180	CA11	277.081	-0.858598	0.222691	-3.85556	0.000115464	0.00299675	Sig. genes		carbonic anhydrase 11 [Source:HGNC Symbol;Acc:HGNC:1370]
ENSG00000063241	ISOC2	20.0189	-0.209311	0.258602	-0.809395	0.418288	0.729956	Non-sig.		isochorismatase domain containing 2 [Source:HGNC Symbol;Acc:HGNC:26278]
ENSG00000063244	U2AF2	386.099	-0.0558605	0.0802298	-0.696256	0.486269	0.780526	Non-sig.		U2 small nuclear RNA auxiliary factor 2 [Source:HGNC Symbol;Acc:HGNC:23156]
ENSG00000063245	EPN1	279.65	-0.021688	0.138835	-0.156214	0.875864	0.958876	Non-sig.		epsin 1 [Source:HGNC Symbol;Acc:HGNC:21604]
ENSG00000063322	MED29	159.344	-0.275933	0.119137	-2.31611	0.0205525	0.140871	Non-sig.		mediator complex subunit 29 [Source:HGNC Symbol;Acc:HGNC:23074]
ENSG00000063438	AHRR	33.6821	-0.117067	0.277422	-0.421983	0.673038	0.877492	Non-sig.		aryl-hydrocarbon receptor repressor [Source:HGNC Symbol;Acc:HGNC:346]
ENSG00000063587	ZNF275	216.632	0.194124	0.0828652	2.34265	0.0191476	0.134642	Non-sig.		zinc finger protein 275 [Source:HGNC Symbol;Acc:HGNC:13069]
ENSG00000063601	MTMR1	64.6671	-0.0504871	0.192986	-0.26161	0.793622	0.929403	Non-sig.		myotubularin related protein 1 [Source:HGNC Symbol;Acc:HGNC:7449]
ENSG00000063660	GPC1	276.369	0.109332	0.119641	0.913834	0.360804	0.686241	Non-sig.		glypican 1 [Source:HGNC Symbol;Acc:HGNC:4449]
ENSG00000063761	ADCK1	18.5617	0.244789	0.271207	0.902592	0.366742	0.691359	Non-sig.		aarF domain containing kinase 1 [Source:HGNC Symbol;Acc:HGNC:19038]
ENSG00000063854	HAGH	303.676	-0.0549674	0.0916492	-0.599758	0.548667	0.817348	Non-sig.		hydroxyacylglutathione hydrolase [Source:HGNC Symbol;Acc:HGNC:4805]
ENSG00000063978	RNF4	64.6147	0.316189	0.176832	1.78807	0.0737641	0.306951	Non-sig.		ring finger protein 4 [Source:HGNC Symbol;Acc:HGNC:10067]
ENSG00000064012	CASP8	32.9216	-0.0377403	0.351	-0.107522	0.914375	0.974027	Non-sig.
ENSG00000064042	LIMCH1	247.862	-0.114181	0.163	-0.700499	0.483616	0.778681	Non-sig.		LIM and calponin homology domains 1 [Source:HGNC Symbol;Acc:HGNC:29191]
ENSG00000064102	INTS13	106.076	-0.0304318	0.113088	-0.269098	0.787855	0.927771	Non-sig.		integrator complex subunit 13 [Source:HGNC Symbol;Acc:HGNC:20174]
ENSG00000064115	TM7SF3	241.305	-0.144969	0.131151	-1.10536	0.269004	0.598753	Non-sig.		transmembrane 7 superfamily member 3 [Source:HGNC Symbol;Acc:HGNC:23049]
ENSG00000064195	DLX3	10.8822	-0.026586	0.559853	-0.0474875	0.962125	0.990807	Non-sig.		distal-less homeobox 3 [Source:HGNC Symbol;Acc:HGNC:2916]
ENSG00000064199	SPA17	60.5911	-0.346863	0.342152	-1.01377	0.310693	0.642451	Non-sig.		sperm autoantigenic protein 17 [Source:HGNC Symbol;Acc:HGNC:11210]
ENSG00000064205	CCN5	19.5528	0.123723	0.357428	0.346147	0.729232	0.902826	Non-sig.		cellular communication network factor 5 [Source:HGNC Symbol;Acc:HGNC:12770]
ENSG00000064225	ST3GAL6	22.8115	0.0756943	0.409239	0.184963	0.853258	0.951713	Non-sig.
ENSG00000064300	NGFR	11.4752	1.23575	0.456152	2.70908	0.00674696	0.0662126	Non-sig.		nerve growth factor receptor [Source:HGNC Symbol;Acc:HGNC:7809]
ENSG00000064309	CDON	669.134	-0.150636	0.150069	-1.00378	0.315484	0.646416	Non-sig.		cell adhesion associated, oncogene regulated [Source:HGNC Symbol;Acc:HGNC:17104]
ENSG00000064313	TAF2	155.376	-0.0719642	0.131061	-0.549088	0.582945	0.835444	Non-sig.
ENSG00000064393	HIPK2	1221.31	-0.176359	0.0850169	-2.0744	0.0380418	0.207923	Non-sig.		homeodomain interacting protein kinase 2 [Source:HGNC Symbol;Acc:HGNC:14402]
ENSG00000064419	TNPO3	257.845	-0.0609031	0.0743059	-0.819627	0.412429	0.725956	Non-sig.		transportin 3 [Source:HGNC Symbol;Acc:HGNC:17103]
ENSG00000064490	RFXANK	64.2926	0.280151	0.201401	1.39101	0.164223	0.473248	Non-sig.		regulatory factor X associated ankyrin containing protein [Source:HGNC Symbol;Acc:HGNC:9987]
ENSG00000064545	TMEM161A	104.536	-0.303176	0.120117	-2.52401	0.0116024	0.0958388	Non-sig.		transmembrane protein 161A [Source:HGNC Symbol;Acc:HGNC:26020]
ENSG00000064547	LPAR2	30.2552	-0.00566283	0.241717	-0.0234275	0.981309	0.99495	Non-sig.		lysophosphatidic acid receptor 2 [Source:HGNC Symbol;Acc:HGNC:3168]
ENSG00000064601	CTSA	697.009	0.21208	0.0967742	2.1915	0.0284158	0.172869	Non-sig.		cathepsin A [Source:HGNC Symbol;Acc:HGNC:9251]
ENSG00000064607	SUGP2	377.086	-0.0501244	0.13422	-0.37345	0.708814	0.892598	Non-sig.		SURP and G-patch domain containing 2 [Source:HGNC Symbol;Acc:HGNC:18641]
ENSG00000064651	SLC12A2	853.871	-0.478642	0.11148	-4.29352	1.75865e-05	0.000623711	Sig. genes		solute carrier family 12 member 2 [Source:HGNC Symbol;Acc:HGNC:10911]
ENSG00000064652	SNX24	206.068	0.93419	0.179982	5.19045	2.09781e-07	1.34185e-05	Sig. genes		sorting nexin 24 [Source:HGNC Symbol;Acc:HGNC:21533]
ENSG00000064655	EYA2	30.0111	-0.309089	0.292847	-1.05546	0.291214	0.62401	Non-sig.		EYA transcriptional coactivator and phosphatase 2 [Source:HGNC Symbol;Acc:HGNC:3520]
ENSG00000064666	CNN2	530.029	0.253012	0.0970851	2.60608	0.00915845	0.081363	Non-sig.		calponin 2 [Source:HGNC Symbol;Acc:HGNC:2156]
ENSG00000064687	ABCA7	90.134	-0.943482	0.151886	-6.21177	5.23923e-10	6.60807e-08	Sig. genes		ATP binding cassette subfamily A member 7 [Source:HGNC Symbol;Acc:HGNC:37]
ENSG00000064692	SNCAIP	15.8545	0.393878	0.41726	0.943964	0.345188	0.674077	Non-sig.		synuclein alpha interacting protein [Source:HGNC Symbol;Acc:HGNC:11139]
ENSG00000064703	DDX20	78.6875	-0.0290472	0.135408	-0.214516	0.830145	0.943155	Non-sig.		DEAD-box helicase 20 [Source:HGNC Symbol;Acc:HGNC:2743]
ENSG00000064726	BTBD1	27.7531	-0.356028	0.274791	-1.29563	0.195102	0.512969	Non-sig.		BTB domain containing 1 [Source:HGNC Symbol;Acc:HGNC:1120]
ENSG00000064763	FAR2	32.5959	-0.617475	0.337909	-1.82734	0.0676487	0.293423	Non-sig.
ENSG00000064787	BCAS1	35.4503	-0.146936	0.488229	-0.300957	0.763447	0.917403	Non-sig.
ENSG00000064886	CHI3L2	140.406	-0.0746859	0.324059	-0.23047	0.817727	0.93844	Non-sig.		chitinase 3 like 2 [Source:HGNC Symbol;Acc:HGNC:1933]
ENSG00000064932	SBNO2	169.076	-0.295969	0.116008	-2.55129	0.0107326	0.0909273	Non-sig.		strawberry notch homolog 2 [Source:HGNC Symbol;Acc:HGNC:29158]
ENSG00000064933	PMS1	65.2945	0.0297017	0.197825	0.150142	0.880653	0.960098	Non-sig.
ENSG00000064961	HMG20B	160.335	-0.234644	0.122514	-1.91524	0.0554617	0.260218	Non-sig.		high mobility group 20B [Source:HGNC Symbol;Acc:HGNC:5002]
ENSG00000064989	CALCRL	15.4215	0.534367	0.621176	0.86025	0.389651	0.710296	Non-sig.		calcitonin receptor like receptor [Source:HGNC Symbol;Acc:HGNC:16709]
ENSG00000064995	TAF11	250.778	-0.0186856	0.0953576	-0.195953	0.844647	0.947906	Non-sig.
ENSG00000064999	ANKS1A	106.466	-0.476243	0.216313	-2.20163	0.0276912	0.170254	Non-sig.		ankyrin repeat and sterile alpha motif domain containing 1A [Source:HGNC Symbol;Acc:HGNC:20961]
ENSG00000065000	AP3D1	1224.95	-0.0200017	0.0752367	-0.265851	0.790354	0.928741	Non-sig.		adaptor related protein complex 3 subunit delta 1 [Source:HGNC Symbol;Acc:HGNC:568]
ENSG00000065029	ZNF76	42.2103	0.0533461	0.182504	0.292302	0.770056	0.920797	Non-sig.		zinc finger protein 76 [Source:HGNC Symbol;Acc:HGNC:13149]
ENSG00000065054	SLC9A3R2	188.84	-0.308858	0.121358	-2.54501	0.0109274	0.0920124	Non-sig.		SLC9A3 regulator 2 [Source:HGNC Symbol;Acc:HGNC:11076]
ENSG00000065057	NTHL1	54.0174	-0.416701	0.251135	-1.65927	0.0970613	0.357468	Non-sig.		nth like DNA glycosylase 1 [Source:HGNC Symbol;Acc:HGNC:8028]
ENSG00000065060	UHRF1BP1	85.619	0.360719	0.138026	2.61341	0.00896439	0.0801559	Non-sig.
ENSG00000065135	GNAI3	309.942	0.0710816	0.096459	0.736909	0.461177	0.763392	Non-sig.		G protein subunit alpha i3 [Source:HGNC Symbol;Acc:HGNC:4387]
ENSG00000065150	IPO5	384.782	0.353553	0.100014	3.53502	0.000407741	0.00796363	Sig. genes		importin 5 [Source:HGNC Symbol;Acc:HGNC:6402]
ENSG00000065154	OAT	118.534	0.305563	0.154237	1.98113	0.0475764	0.237551	Non-sig.		ornithine aminotransferase [Source:HGNC Symbol;Acc:HGNC:8091]
ENSG00000065183	WDR3	188.982	-0.112261	0.104039	-1.07902	0.280577	0.613201	Non-sig.		WD repeat domain 3 [Source:HGNC Symbol;Acc:HGNC:12755]
ENSG00000065243	PKN2	290.268	0.0588004	0.130647	0.450072	0.652659	0.868692	Non-sig.		protein kinase N2 [Source:HGNC Symbol;Acc:HGNC:9406]
ENSG00000065268	WDR18	59.4583	-0.0610868	0.23273	-0.26248	0.792952	0.929118	Non-sig.		WD repeat domain 18 [Source:HGNC Symbol;Acc:HGNC:17956]
ENSG00000065308	TRAM2	483.204	0.634074	0.0943199	6.72259	1.78517e-11	3.01626e-09	Sig. genes		translocation associated membrane protein 2 [Source:HGNC Symbol;Acc:HGNC:16855]
ENSG00000065320	NTN1	320.686	-0.309078	0.121969	-2.53406	0.0112748	0.0939566	Non-sig.		netrin 1 [Source:HGNC Symbol;Acc:HGNC:8029]
ENSG00000065328	MCM10	8.19169	-0.867741	0.654685	-1.32543	0.185028	0.500053	Non-sig.		minichromosome maintenance 10 replication initiation factor [Source:HGNC Symbol;Acc:HGNC:18043]
ENSG00000065357	DGKA	128.756	0.0420423	0.173445	0.242395	0.808474	0.934377	Non-sig.		diacylglycerol kinase alpha [Source:HGNC Symbol;Acc:HGNC:2849]
ENSG00000065361	ERBB3	179.391	0.32181	0.200801	1.60263	0.109016	0.382613	Non-sig.		erb-b2 receptor tyrosine kinase 3 [Source:HGNC Symbol;Acc:HGNC:3431]
ENSG00000065413	ANKRD44	80.6445	0.0354473	0.295069	0.120133	0.904378	0.969943	Non-sig.		ankyrin repeat domain 44 [Source:HGNC Symbol;Acc:HGNC:25259]
ENSG00000065427	KARS1	612.02	-0.00477575	0.0846391	-0.0564249	0.955003	0.987566	Non-sig.		lysyl-tRNA synthetase 1 [Source:HGNC Symbol;Acc:HGNC:6215]
ENSG00000065457	ADAT1	204.272	-0.142067	0.124175	-1.14408	0.252589	0.580504	Non-sig.		adenosine deaminase tRNA specific 1 [Source:HGNC Symbol;Acc:HGNC:228]
ENSG00000065485	PDIA5	64.2718	0.910166	0.201781	4.51066	6.46271e-06	0.000258942	Sig. genes		protein disulfide isomerase family A member 5 [Source:HGNC Symbol;Acc:HGNC:24811]
ENSG00000065491	TBC1D22B	44.5266	0.204726	0.207636	0.985989	0.324139	0.653866	Non-sig.		TBC1 domain family member 22B [Source:HGNC Symbol;Acc:HGNC:21602]
ENSG00000065518	NDUFB4	598.14	-0.13632	0.0607199	-2.24507	0.0247638	0.158238	Non-sig.		NADH:ubiquinone oxidoreductase subunit B4 [Source:HGNC Symbol;Acc:HGNC:7699]
ENSG00000065526	SPEN	599.347	0.0552689	0.0655441	0.843233	0.399098	0.716935	Non-sig.		spen family transcriptional repressor [Source:HGNC Symbol;Acc:HGNC:17575]
ENSG00000065534	MYLK	204.972	0.446316	0.323115	1.38129	0.167189	0.477273	Non-sig.
ENSG00000065548	ZC3H15	963.597	-0.098489	0.076395	-1.28921	0.197326	0.516224	Non-sig.		zinc finger CCCH-type containing 15 [Source:HGNC Symbol;Acc:HGNC:29528]
ENSG00000065559	MAP2K4	107.664	0.0199876	0.128884	0.155082	0.876757	0.959178	Non-sig.		mitogen-activated protein kinase kinase 4 [Source:HGNC Symbol;Acc:HGNC:6844]
ENSG00000065600	PACC1	29.6305	0.0550828	0.220046	0.250324	0.802337	0.932524	Non-sig.		proton activated chloride channel 1 [Source:HGNC Symbol;Acc:HGNC:25593]
ENSG00000065613	SLK	861.251	-0.302892	0.0998164	-3.0345	0.00240937	0.0314169	Sig. genes		STE20 like kinase [Source:HGNC Symbol;Acc:HGNC:11088]
ENSG00000065615	CYB5R4	75.843	-0.544963	0.228716	-2.3827	0.0171861	0.126097	Non-sig.		cytochrome b5 reductase 4 [Source:HGNC Symbol;Acc:HGNC:20147]
ENSG00000065618	COL17A1	336.171	-0.0606093	0.473538	-0.127992	0.898155	0.966794	Non-sig.		collagen type XVII alpha 1 chain [Source:HGNC Symbol;Acc:HGNC:2194]
ENSG00000065621	GSTO2	71.0554	-0.490745	0.198688	-2.46992	0.0135143	0.106626	Non-sig.		glutathione S-transferase omega 2 [Source:HGNC Symbol;Acc:HGNC:23064]
ENSG00000065665	SEC61A2	28.6262	-0.036329	0.219488	-0.165517	0.868537	0.956908	Non-sig.		SEC61 translocon subunit alpha 2 [Source:HGNC Symbol;Acc:HGNC:17702]
ENSG00000065675	PRKCQ	13.1174	0.140955	0.425662	0.331143	0.740536	0.907306	Non-sig.
ENSG00000065717	TLE2	109.546	-0.544231	0.558777	-0.973967	0.330073	0.659556	Non-sig.		TLE family member 2, transcriptional corepressor [Source:HGNC Symbol;Acc:HGNC:11838]
ENSG00000065802	ASB1	82.2377	-0.0050307	0.16397	-0.0306807	0.975524	0.993789	Non-sig.		ankyrin repeat and SOCS box containing 1 [Source:HGNC Symbol;Acc:HGNC:16011]
ENSG00000065809	FAM107B	515.578	0.127585	0.195506	0.652586	0.514023	0.797739	Non-sig.		family with sequence similarity 107 member B [Source:HGNC Symbol;Acc:HGNC:23726]
ENSG00000065833	ME1	178.176	0.345821	0.14536	2.37906	0.0173568	0.126867	Non-sig.		malic enzyme 1 [Source:HGNC Symbol;Acc:HGNC:6983]
ENSG00000065882	TBC1D1	168.675	0.380042	0.176403	2.15439	0.0312093	0.183282	Non-sig.
ENSG00000065883	CDK13	369.075	0.0796742	0.129665	0.614461	0.53891	0.81273	Non-sig.
ENSG00000065911	MTHFD2	430.224	0.353636	0.171131	2.06647	0.0387844	0.210321	Non-sig.		methylenetetrahydrofolate dehydrogenase (NADP+ dependent) 2, methenyltetrahydrofolate cyclohydrolase [Source:HGNC Symbol;Acc:HGNC:7434]
ENSG00000065923	SLC9A7	345.237	-0.291165	0.150685	-1.93228	0.0533251	0.254341	Non-sig.		solute carrier family 9 member A7 [Source:HGNC Symbol;Acc:HGNC:17123]
ENSG00000065970	FOXJ2	88.4174	0.113439	0.149046	0.761103	0.446596	0.752731	Non-sig.		forkhead box J2 [Source:HGNC Symbol;Acc:HGNC:24818]
ENSG00000065978	YBX1	2392.3	-0.0141756	0.0567083	-0.249974	0.802608	0.932524	Non-sig.		Y-box binding protein 1 [Source:HGNC Symbol;Acc:HGNC:8014]
ENSG00000065989	PDE4A	45.2027	0.505373	0.249878	2.02248	0.0431272	0.223527	Non-sig.		phosphodiesterase 4A [Source:HGNC Symbol;Acc:HGNC:8780]
ENSG00000066027	PPP2R5A	103.232	0.000258161	0.142681	0.00180935	0.998556	0.999645	Non-sig.		protein phosphatase 2 regulatory subunit B'alpha [Source:HGNC Symbol;Acc:HGNC:9309]
ENSG00000066044	ELAVL1	210.126	-0.118559	0.090825	-1.30535	0.191772	0.508309	Non-sig.		ELAV like RNA binding protein 1 [Source:HGNC Symbol;Acc:HGNC:3312]
ENSG00000066056	TIE1	10.1025	-0.746371	0.633427	-1.17831	0.238675	0.566631	Non-sig.		tyrosine kinase with immunoglobulin like and EGF like domains 1 [Source:HGNC Symbol;Acc:HGNC:11809]
ENSG00000066084	DIP2B	340.982	0.156358	0.233976	0.668265	0.503964	0.791338	Non-sig.		disco interacting protein 2 homolog B [Source:HGNC Symbol;Acc:HGNC:29284]
ENSG00000066117	SMARCD1	103.761	-0.294834	0.231072	-1.27594	0.201977	0.522024	Non-sig.		SWI/SNF related, matrix associated, actin dependent regulator of chromatin, subfamily d, member 1 [Source:HGNC Symbol;Acc:HGNC:11106]
ENSG00000066135	KDM4A	192.45	0.0221649	0.0908225	0.244046	0.807195	0.933883	Non-sig.		lysine demethylase 4A [Source:HGNC Symbol;Acc:HGNC:22978]
ENSG00000066136	NFYC	98.5864	-0.192026	0.137522	-1.39633	0.162615	0.471039	Non-sig.
ENSG00000066185	ZMYND12	3.84229	-1.07908	0.767277	-1.40637	0.159614	0.466039	Non-sig.		zinc finger MYND-type containing 12 [Source:HGNC Symbol;Acc:HGNC:21192]
ENSG00000066230	SLC9A3	38.8163	0.16411	0.186573	0.879603	0.379074	0.702535	Non-sig.		solute carrier family 9 member A3 [Source:HGNC Symbol;Acc:HGNC:11073]
ENSG00000066248	NGEF	3.7067	-0.185285	1.05703	-0.175289	0.860853	0.954542	Non-sig.		neuronal guanine nucleotide exchange factor [Source:HGNC Symbol;Acc:HGNC:7807]
ENSG00000066279	ASPM	36.9578	0.758449	0.388716	1.95116	0.0510377	0.248457	Non-sig.		assembly factor for spindle microtubules [Source:HGNC Symbol;Acc:HGNC:19048]
ENSG00000066294	CD84	26.2787	-0.00345631	0.419229	-0.00824444	0.993422	0.998369	Non-sig.		CD84 molecule [Source:HGNC Symbol;Acc:HGNC:1704]
ENSG00000066322	ELOVL1	94.1287	0.13609	0.126244	1.07799	0.281038	0.613528	Non-sig.		ELOVL fatty acid elongase 1 [Source:HGNC Symbol;Acc:HGNC:14418]
ENSG00000066379	POLR1H	57.0957	0.139195	0.145574	0.956179	0.338982	0.667601	Non-sig.		RNA polymerase I subunit H [Source:HGNC Symbol;Acc:HGNC:13182]
ENSG00000066382	MPPED2	9.39528	0.165002	0.698018	0.236386	0.813133	0.936066	Non-sig.		metallophosphoesterase domain containing 2 [Source:HGNC Symbol;Acc:HGNC:1180]
ENSG00000066422	ZBTB11	95.4365	-0.124296	0.177552	-0.700056	0.483892	0.778964	Non-sig.
ENSG00000066427	ATXN3	211.812	-0.118682	0.126938	-0.934962	0.349808	0.678477	Non-sig.
ENSG00000066455	GOLGA5	81.2177	-0.0604559	0.128044	-0.472149	0.636821	0.861775	Non-sig.		golgin A5 [Source:HGNC Symbol;Acc:HGNC:4428]
ENSG00000066468	FGFR2	222.519	-0.407738	0.183033	-2.22768	0.025902	0.162633	Non-sig.		fibroblast growth factor receptor 2 [Source:HGNC Symbol;Acc:HGNC:3689]
ENSG00000066557	LRRC40	44.7482	0.0527321	0.166006	0.317653	0.750748	0.912541	Non-sig.		leucine rich repeat containing 40 [Source:HGNC Symbol;Acc:HGNC:26004]
ENSG00000066583	ISOC1	28.57	-0.117979	0.171191	-0.689165	0.490719	0.783134	Non-sig.		isochorismatase domain containing 1 [Source:HGNC Symbol;Acc:HGNC:24254]
ENSG00000066629	EML1	56.4512	0.0866698	0.301946	0.287037	0.774084	0.922279	Non-sig.		EMAP like 1 [Source:HGNC Symbol;Acc:HGNC:3330]
ENSG00000066651	TRMT11	62.015	-0.222676	0.185061	-1.20326	0.228877	0.55507	Non-sig.		tRNA methyltransferase 11 homolog [Source:HGNC Symbol;Acc:HGNC:21080]
ENSG00000066654	THUMPD1	358.613	0.133657	0.0778012	1.71792	0.0858105	0.33625	Non-sig.		THUMP domain containing 1 [Source:HGNC Symbol;Acc:HGNC:23807]
ENSG00000066697	MSANTD3	104.178	0.266114	0.098592	2.69915	0.00695174	0.0672019	Non-sig.		Myb/SANT DNA binding domain containing 3 [Source:HGNC Symbol;Acc:HGNC:23370]
ENSG00000066735	KIF26A	33.7971	0.477535	0.341269	1.39929	0.161726	0.469281	Non-sig.		kinesin family member 26A [Source:HGNC Symbol;Acc:HGNC:20226]
ENSG00000066739	ATG2B	145.388	-0.793941	0.542505	-1.46347	0.143338	0.441629	Non-sig.		autophagy related 2B [Source:HGNC Symbol;Acc:HGNC:20187]
ENSG00000066777	ARFGEF1	229.224	0.125901	0.107335	1.17297	0.240806	0.568226	Non-sig.		ADP ribosylation factor guanine nucleotide exchange factor 1 [Source:HGNC Symbol;Acc:HGNC:15772]
ENSG00000066827	ZFAT	45.8441	-0.186529	0.243206	-0.766957	0.443107	0.750637	Non-sig.		zinc finger and AT-hook domain containing [Source:HGNC Symbol;Acc:HGNC:19899]
ENSG00000066855	MTFR1	51.1451	-0.0194747	0.327645	-0.0594385	0.952603	0.986762	Non-sig.		mitochondrial fission regulator 1 [Source:HGNC Symbol;Acc:HGNC:29510]
ENSG00000066923	STAG3	6.53833	-1.27401	1.01828	-1.25114	0.210885	0.531724	Non-sig.		stromal antigen 3 [Source:HGNC Symbol;Acc:HGNC:11356]
ENSG00000066926	FECH	80.3725	0.00783889	0.165684	0.0473123	0.962264	0.990807	Non-sig.		ferrochelatase [Source:HGNC Symbol;Acc:HGNC:3647]
ENSG00000066933	MYO9A	379.217	-0.2212	0.199082	-1.1111	0.266525	0.596385	Non-sig.		myosin IXA [Source:HGNC Symbol;Acc:HGNC:7608]
ENSG00000067048	DDX3Y	240.449	0.2591	0.249033	1.04042	0.298144	0.630506	Non-sig.		DEAD-box helicase 3 Y-linked [Source:HGNC Symbol;Acc:HGNC:2699]
ENSG00000067057	PFKP	981.614	0.292134	0.187579	1.55739	0.119378	0.402057	Non-sig.		phosphofructokinase, platelet [Source:HGNC Symbol;Acc:HGNC:8878]
ENSG00000067064	IDI1	115.404	-0.0551713	0.176752	-0.31214	0.754934	0.913943	Non-sig.
ENSG00000067066	SP100	649.442	0.113562	0.0950673	1.19455	0.232264	0.55949	Non-sig.		SP100 nuclear antigen [Source:HGNC Symbol;Acc:HGNC:11206]
ENSG00000067082	KLF6	238.883	0.483461	0.201332	2.40131	0.0163363	0.122499	Non-sig.		Kruppel like factor 6 [Source:HGNC Symbol;Acc:HGNC:2235]
ENSG00000067113	PLPP1	72.2778	-0.164415	0.154114	-1.06684	0.286044	0.619064	Non-sig.		phospholipid phosphatase 1 [Source:HGNC Symbol;Acc:HGNC:9228]
ENSG00000067141	NEO1	432.667	-0.0402508	0.103362	-0.389416	0.696968	0.887081	Non-sig.		neogenin 1 [Source:HGNC Symbol;Acc:HGNC:7754]
ENSG00000067167	TRAM1	1037.47	0.314913	0.117302	2.68464	0.0072608	0.0691707	Non-sig.		translocation associated membrane protein 1 [Source:HGNC Symbol;Acc:HGNC:20568]
ENSG00000067177	PHKA1	67.8358	-0.470571	0.179665	-2.61916	0.00881477	0.0791341	Non-sig.		phosphorylase kinase regulatory subunit alpha 1 [Source:HGNC Symbol;Acc:HGNC:8925]
ENSG00000067182	TNFRSF1A	454.159	-0.166835	0.101305	-1.64685	0.0995885	0.362674	Non-sig.		TNF receptor superfamily member 1A [Source:HGNC Symbol;Acc:HGNC:11916]
ENSG00000067191	CACNB1	20.3002	0.142721	0.345877	0.412634	0.679875	0.880077	Non-sig.		calcium voltage-gated channel auxiliary subunit beta 1 [Source:HGNC Symbol;Acc:HGNC:1401]
ENSG00000067208	EVI5	616.616	0.0684324	0.0906619	0.754809	0.450364	0.755386	Non-sig.
ENSG00000067221	STOML1	68.98	-0.0330426	0.162005	-0.203961	0.838384	0.945404	Non-sig.		stomatin like 1 [Source:HGNC Symbol;Acc:HGNC:14560]
ENSG00000067225	PKM	3080.25	-0.0434636	0.0881151	-0.493259	0.621829	0.853624	Non-sig.
ENSG00000067248	DHX29	367.333	-0.0537814	0.0867124	-0.620227	0.535108	0.811168	Non-sig.
ENSG00000067334	DNTTIP2	363.78	0.147988	0.10849	1.36407	0.172547	0.484477	Non-sig.		deoxynucleotidyltransferase terminal interacting protein 2 [Source:HGNC Symbol;Acc:HGNC:24013]
ENSG00000067365	METTL22	37.1812	0.628585	0.325086	1.93359	0.0531631	0.25395	Non-sig.		methyltransferase 22, Kin17 lysine [Source:HGNC Symbol;Acc:HGNC:28368]
ENSG00000067369	TP53BP1	439.287	0.114412	0.179647	0.636868	0.524211	0.804213	Non-sig.		tumor protein p53 binding protein 1 [Source:HGNC Symbol;Acc:HGNC:11999]
ENSG00000067445	TRO	123.366	0.379172	0.163127	2.32439	0.0201045	0.139024	Non-sig.
ENSG00000067533	RRP15	237.111	0.151992	0.0980872	1.54956	0.121247	0.405362	Non-sig.		ribosomal RNA processing 15 homolog [Source:HGNC Symbol;Acc:HGNC:24255]
ENSG00000067560	RHOA	1542.05	0.174807	0.0624741	2.79807	0.00514091	0.0544815	Non-sig.		ras homolog family member A [Source:HGNC Symbol;Acc:HGNC:667]
ENSG00000067596	DHX8	128.44	-0.136082	0.264803	-0.513899	0.607322	0.847261	Non-sig.		DEAH-box helicase 8 [Source:HGNC Symbol;Acc:HGNC:2749]
ENSG00000067601	PMS2P4	3.65409	-1.53773	0.988838	-1.55509	0.119925	0.40303	Non-sig.
ENSG00000067606	PRKCZ	86.5806	-0.25992	0.143929	-1.80589	0.0709348	0.300847	Non-sig.		protein kinase C zeta [Source:HGNC Symbol;Acc:HGNC:9412]
ENSG00000067646	ZFY	34.1999	0.0219908	0.404467	0.0543699	0.95664	0.9886	Non-sig.		zinc finger protein Y-linked [Source:HGNC Symbol;Acc:HGNC:12870]
ENSG00000067704	IARS2	282.808	-0.0640159	0.071039	-0.901137	0.367516	0.692135	Non-sig.		isoleucyl-tRNA synthetase 2, mitochondrial [Source:HGNC Symbol;Acc:HGNC:29685]
ENSG00000067798	NAV3	36.33	0.241927	0.426023	0.567873	0.570121	0.828631	Non-sig.		neuron navigator 3 [Source:HGNC Symbol;Acc:HGNC:15998]
ENSG00000067829	IDH3G	122.45	0.000348296	0.149168	0.00233493	0.998137	0.999588	Non-sig.
ENSG00000067836	ROGDI	45.5989	-0.57937	0.185373	-3.12544	0.00177541	0.0250375	Sig. genes		rogdi atypical leucine zipper [Source:HGNC Symbol;Acc:HGNC:29478]
ENSG00000067840	PDZD4	16.0662	0.406103	0.358098	1.13406	0.256771	0.585607	Non-sig.		PDZ domain containing 4 [Source:HGNC Symbol;Acc:HGNC:21167]
ENSG00000067900	ROCK1	884.978	0.252852	0.104846	2.41165	0.0158807	0.12006	Non-sig.		Rho associated coiled-coil containing protein kinase 1 [Source:HGNC Symbol;Acc:HGNC:10251]
ENSG00000067955	CBFB	155.399	0.124014	0.130323	0.951589	0.341305	0.669967	Non-sig.		core-binding factor subunit beta [Source:HGNC Symbol;Acc:HGNC:1539]
ENSG00000067992	PDK3	195.303	-0.277267	0.110158	-2.51699	0.0118361	0.0971957	Non-sig.
ENSG00000068001	HYAL2	93.7043	-0.467978	0.144657	-3.2351	0.001216	0.0185348	Sig. genes		hyaluronidase 2 [Source:HGNC Symbol;Acc:HGNC:5321]
ENSG00000068024	HDAC4	78.7878	-0.344695	0.209164	-1.64797	0.0993598	0.362411	Non-sig.
ENSG00000068028	RASSF1	61.3764	0.285447	0.165523	1.72452	0.0846142	0.333204	Non-sig.		Ras association domain family member 1 [Source:HGNC Symbol;Acc:HGNC:9882]
ENSG00000068078	FGFR3	51.4682	-0.124834	0.399914	-0.312152	0.754925	0.913943	Non-sig.		fibroblast growth factor receptor 3 [Source:HGNC Symbol;Acc:HGNC:3690]
ENSG00000068079	IFI35	24.9125	-0.488096	0.241299	-2.02278	0.0430956	0.223527	Non-sig.		interferon induced protein 35 [Source:HGNC Symbol;Acc:HGNC:5399]
ENSG00000068097	HEATR6	129.618	-0.107401	0.137255	-0.782495	0.433924	0.743918	Non-sig.
ENSG00000068120	COASY	152.819	-0.358137	0.0903297	-3.96477	7.34654e-05	0.00209517	Sig. genes		Coenzyme A synthase [Source:HGNC Symbol;Acc:HGNC:29932]
ENSG00000068137	PLEKHH3	145.312	-0.386675	0.14087	-2.74491	0.00605274	0.0613495	Non-sig.		pleckstrin homology, MyTH4 and FERM domain containing H3 [Source:HGNC Symbol;Acc:HGNC:26105]
ENSG00000068305	MEF2A	215.569	0.231508	0.201518	1.14882	0.25063	0.578173	Non-sig.
ENSG00000068308	OTUD5	237.162	-0.0977239	0.0985134	-0.991986	0.321204	0.651798	Non-sig.
ENSG00000068323	TFE3	182.733	0.116033	0.110844	1.04681	0.295188	0.626935	Non-sig.		transcription factor binding to IGHM enhancer 3 [Source:HGNC Symbol;Acc:HGNC:11752]
ENSG00000068354	TBC1D25	63.9051	0.142405	0.169542	0.839942	0.400941	0.717727	Non-sig.		TBC1 domain family member 25 [Source:HGNC Symbol;Acc:HGNC:8092]
ENSG00000068366	ACSL4	236.067	0.682907	0.168293	4.05786	4.9525e-05	0.00152404	Sig. genes		acyl-CoA synthetase long chain family member 4 [Source:HGNC Symbol;Acc:HGNC:3571]
ENSG00000068383	INPP5A	69.2655	0.0823412	0.174492	0.471889	0.637006	0.861775	Non-sig.		inositol polyphosphate-5-phosphatase A [Source:HGNC Symbol;Acc:HGNC:6076]
ENSG00000068394	GPKOW	45.5023	0.232274	0.168143	1.38141	0.167154	0.477273	Non-sig.		G-patch domain and KOW motifs [Source:HGNC Symbol;Acc:HGNC:30677]
ENSG00000068400	GRIPAP1	318.079	-0.056902	0.180871	-0.3146	0.753065	0.913094	Non-sig.		GRIP1 associated protein 1 [Source:HGNC Symbol;Acc:HGNC:18706]
ENSG00000068438	FTSJ1	66.1958	0.0872271	0.146144	0.596858	0.550602	0.818916	Non-sig.		FtsJ RNA 2'-O-methyltransferase 1 [Source:HGNC Symbol;Acc:HGNC:13254]
ENSG00000068489	PRR11	139.939	-0.0344353	0.358301	-0.0961071	0.923436	0.976704	Non-sig.		proline rich 11 [Source:HGNC Symbol;Acc:HGNC:25619]
ENSG00000068650	ATP11A	84.2297	-0.312242	0.215289	-1.45034	0.146964	0.447759	Non-sig.		ATPase phospholipid transporting 11A [Source:HGNC Symbol;Acc:HGNC:13552]
ENSG00000068654	POLR1A	180.414	-0.0344112	0.134611	-0.255634	0.798233	0.931192	Non-sig.		RNA polymerase I subunit A [Source:HGNC Symbol;Acc:HGNC:17264]
ENSG00000068697	LAPTM4A	4264.41	0.134842	0.0490915	2.74675	0.00601885	0.0610405	Non-sig.		lysosomal protein transmembrane 4 alpha [Source:HGNC Symbol;Acc:HGNC:6924]
ENSG00000068724	TTC7A	80.032	0.127323	0.161188	0.789904	0.429584	0.740291	Non-sig.		tetratricopeptide repeat domain 7A [Source:HGNC Symbol;Acc:HGNC:19750]
ENSG00000068745	IP6K2	244.976	-0.208888	0.138986	-1.50294	0.132855	0.425171	Non-sig.		inositol hexakisphosphate kinase 2 [Source:HGNC Symbol;Acc:HGNC:17313]
ENSG00000068784	SRBD1	46.2608	-0.167306	0.212925	-0.785747	0.432016	0.742054	Non-sig.		S1 RNA binding domain 1 [Source:HGNC Symbol;Acc:HGNC:25521]
ENSG00000068796	KIF2A	448.128	-0.22091	0.153894	-1.43547	0.151154	0.454527	Non-sig.		kinesin family member 2A [Source:HGNC Symbol;Acc:HGNC:6318]
ENSG00000068831	RASGRP2	14.9241	-2.11235	0.450089	-4.69318	2.68991e-06	0.000119841	Sig. genes		RAS guanyl releasing protein 2 [Source:HGNC Symbol;Acc:HGNC:9879]
ENSG00000068878	PSME4	234.128	-0.0287991	0.142748	-0.201748	0.840114	0.946388	Non-sig.		proteasome activator subunit 4 [Source:HGNC Symbol;Acc:HGNC:20635]
ENSG00000068885	IFT80	85.4739	-0.288104	0.206792	-1.39321	0.163557	0.472698	Non-sig.		intraflagellar transport 80 [Source:HGNC Symbol;Acc:HGNC:29262]
ENSG00000068903	SIRT2	137.514	-0.053942	0.173297	-0.31127	0.755596	0.914064	Non-sig.
ENSG00000068912	ERLEC1	458.409	0.237436	0.0823977	2.88159	0.00395672	0.044738	Sig. genes
ENSG00000068971	PPP2R5B	13.9522	-0.865607	0.326003	-2.65521	0.00792579	0.0733596	Non-sig.		protein phosphatase 2 regulatory subunit B'beta [Source:HGNC Symbol;Acc:HGNC:9310]
ENSG00000068976	PYGM	3.99614	-1.01186	0.919201	-1.10081	0.27098	0.60132	Non-sig.		glycogen phosphorylase, muscle associated [Source:HGNC Symbol;Acc:HGNC:9726]
ENSG00000069011	PITX1	323.399	-0.309236	0.0914037	-3.38318	0.000716507	0.0123391	Sig. genes		paired like homeodomain 1 [Source:HGNC Symbol;Acc:HGNC:9004]
ENSG00000069020	MAST4	292.42	-0.871523	0.263238	-3.31078	0.000930368	0.0150387	Sig. genes
ENSG00000069122	ADGRF5	5.84695	1.02407	0.816821	1.25372	0.209942	0.530783	Non-sig.		adhesion G protein-coupled receptor F5 [Source:HGNC Symbol;Acc:HGNC:19030]
ENSG00000069188	SDK2	6.49802	0.472808	0.440173	1.07414	0.282759	0.61571	Non-sig.		sidekick cell adhesion molecule 2 [Source:HGNC Symbol;Acc:HGNC:19308]
ENSG00000069248	NUP133	119.226	-0.19319	0.136985	-1.4103	0.15845	0.465059	Non-sig.		nucleoporin 133 [Source:HGNC Symbol;Acc:HGNC:18016]
ENSG00000069275	NUCKS1	4827.34	-0.37038	0.182688	-2.02739	0.0426222	0.22262	Non-sig.		nuclear casein kinase and cyclin dependent kinase substrate 1 [Source:HGNC Symbol;Acc:HGNC:29923]
ENSG00000069329	VPS35	675.517	-0.0939034	0.0782426	-1.20016	0.230079	0.557003	Non-sig.		VPS35 retromer complex component [Source:HGNC Symbol;Acc:HGNC:13487]
ENSG00000069345	DNAJA2	307.825	0.0288889	0.103337	0.279559	0.779816	0.924921	Non-sig.		DnaJ heat shock protein family (Hsp40) member A2 [Source:HGNC Symbol;Acc:HGNC:14884]
ENSG00000069399	BCL3	436.389	-0.384054	0.138429	-2.77437	0.00553089	0.0574251	Non-sig.		BCL3 transcription coactivator [Source:HGNC Symbol;Acc:HGNC:998]
ENSG00000069424	KCNAB2	153.891	-0.47067	0.182864	-2.57388	0.0100565	0.0867175	Non-sig.
ENSG00000069431	ABCC9	20.1451	0.77857	0.553537	1.40654	0.159564	0.466006	Non-sig.
ENSG00000069493	CLEC2D	308.145	0.436444	0.230438	1.89397	0.0582285	0.26892	Non-sig.		C-type lectin domain family 2 member D [Source:HGNC Symbol;Acc:HGNC:14351]
ENSG00000069509	FUNDC1	92.4111	-0.197351	0.144312	-1.36753	0.17146	0.483598	Non-sig.		FUN14 domain containing 1 [Source:HGNC Symbol;Acc:HGNC:28746]
ENSG00000069535	MAOB	92.8418	-0.118783	0.231644	-0.512783	0.608103	0.847573	Non-sig.		monoamine oxidase B [Source:HGNC Symbol;Acc:HGNC:6834]
ENSG00000069667	RORA	916.12	-0.189944	0.125459	-1.514	0.130027	0.420434	Non-sig.		RAR related orphan receptor A [Source:HGNC Symbol;Acc:HGNC:10258]
ENSG00000069702	TGFBR3	2296.02	-0.476198	0.111156	-4.28406	1.83516e-05	0.000649559	Sig. genes		transforming growth factor beta receptor 3 [Source:HGNC Symbol;Acc:HGNC:11774]
ENSG00000069812	HES2	26.5267	0.14517	0.489459	0.296594	0.766777	0.918962	Non-sig.		hes family bHLH transcription factor 2 [Source:HGNC Symbol;Acc:HGNC:16005]
ENSG00000069849	ATP1B3	950.252	-0.0991716	0.116974	-0.847806	0.396546	0.715684	Non-sig.		ATPase Na+/K+ transporting subunit beta 3 [Source:HGNC Symbol;Acc:HGNC:806]
ENSG00000069869	NEDD4	103.689	0.779123	0.334174	2.33149	0.0197275	0.137051	Non-sig.		NEDD4 E3 ubiquitin protein ligase [Source:HGNC Symbol;Acc:HGNC:7727]
ENSG00000069943	PIGB	30.2937	-0.250035	0.195978	-1.27583	0.202015	0.522024	Non-sig.		phosphatidylinositol glycan anchor biosynthesis class B [Source:HGNC Symbol;Acc:HGNC:8959]
ENSG00000069956	MAPK6	275.606	0.0555034	0.190393	0.29152	0.770654	0.921082	Non-sig.
ENSG00000069966	GNB5	364.669	-0.363317	0.133219	-2.72722	0.006387	0.0635505	Non-sig.		G protein subunit beta 5 [Source:HGNC Symbol;Acc:HGNC:4401]
ENSG00000069974	RAB27A	207.086	0.0565932	0.0965308	0.586271	0.557694	0.821988	Non-sig.		RAB27A, member RAS oncogene family [Source:HGNC Symbol;Acc:HGNC:9766]
ENSG00000069998	HDHD5	68.3345	0.287826	0.14859	1.93705	0.052739	0.252757	Non-sig.		haloacid dehalogenase like hydrolase domain containing 5 [Source:HGNC Symbol;Acc:HGNC:1843]
ENSG00000070010	UFD1	284.244	0.0353928	0.110136	0.321356	0.747941	0.911266	Non-sig.		ubiquitin recognition factor in ER associated degradation 1 [Source:HGNC Symbol;Acc:HGNC:12520]
ENSG00000070018	LRP6	193.586	0.0979391	0.187214	0.523138	0.600878	0.844591	Non-sig.		LDL receptor related protein 6 [Source:HGNC Symbol;Acc:HGNC:6698]
ENSG00000070047	PHRF1	309.163	0.0504864	0.0794519	0.635433	0.525146	0.80484	Non-sig.		PHD and ring finger domains 1 [Source:HGNC Symbol;Acc:HGNC:24351]
ENSG00000070061	ELP1	82.1627	-0.242597	0.187001	-1.2973	0.194527	0.51265	Non-sig.		elongator acetyltransferase complex subunit 1 [Source:HGNC Symbol;Acc:HGNC:5959]
ENSG00000070081	NUCB2	932.264	0.0295601	0.114825	0.257437	0.796842	0.930653	Non-sig.
ENSG00000070087	PFN2	593.984	-0.0966065	0.111684	-0.865002	0.387038	0.708005	Non-sig.
ENSG00000070159	PTPN3	43.983	0.621739	0.322342	1.92882	0.0537536	0.255431	Non-sig.		protein tyrosine phosphatase non-receptor type 3 [Source:HGNC Symbol;Acc:HGNC:9655]
ENSG00000070182	SPTB	51.5906	-0.219442	0.183001	-1.19913	0.230478	0.557505	Non-sig.		spectrin beta, erythrocytic [Source:HGNC Symbol;Acc:HGNC:11274]
ENSG00000070190	DAPP1	10.0852	0.770182	0.611417	1.25967	0.207789	0.528685	Non-sig.		dual adaptor of phosphotyrosine and 3-phosphoinositides 1 [Source:HGNC Symbol;Acc:HGNC:16500]
ENSG00000070193	FGF10	2808.55	-0.741695	0.167376	-4.43131	9.36622e-06	0.000366264	Sig. genes		fibroblast growth factor 10 [Source:HGNC Symbol;Acc:HGNC:3666]
ENSG00000070214	SLC44A1	286.773	-0.134847	0.116644	-1.15605	0.24766	0.575378	Non-sig.		solute carrier family 44 member 1 [Source:HGNC Symbol;Acc:HGNC:18798]
ENSG00000070269	TMEM260	81.2775	-0.102951	0.15678	-0.656656	0.511402	0.795509	Non-sig.		transmembrane protein 260 [Source:HGNC Symbol;Acc:HGNC:20185]
ENSG00000070366	SMG6	203.7	0.0821677	0.089833	0.914671	0.360364	0.686116	Non-sig.		SMG6 nonsense mediated mRNA decay factor [Source:HGNC Symbol;Acc:HGNC:17809]
ENSG00000070367	EXOC5	224.672	0.0416339	0.0751113	0.554296	0.579376	0.833512	Non-sig.		exocyst complex component 5 [Source:HGNC Symbol;Acc:HGNC:10696]
ENSG00000070371	CLTCL1	22.3358	-0.0857212	0.336648	-0.254631	0.799008	0.931494	Non-sig.		clathrin heavy chain like 1 [Source:HGNC Symbol;Acc:HGNC:2093]
ENSG00000070388	FGF22	10.56	-0.425166	0.481725	-0.882591	0.377457	0.701303	Non-sig.
ENSG00000070404	FSTL3	212.688	1.80876	0.182683	9.90108	4.11822e-23	4.09763e-20	Sig. genes		follistatin like 3 [Source:HGNC Symbol;Acc:HGNC:3973]
ENSG00000070413	DGCR2	240.052	-0.000916485	0.0981233	-0.00934014	0.992548	0.998178	Non-sig.		DiGeorge syndrome critical region gene 2 [Source:HGNC Symbol;Acc:HGNC:2845]
ENSG00000070423	RNF126	161.228	-0.0607286	0.10608	-0.572479	0.566998	0.827194	Non-sig.		ring finger protein 126 [Source:HGNC Symbol;Acc:HGNC:21151]
ENSG00000070444	MNT	136.433	-0.249522	0.123581	-2.0191	0.0434772	0.224273	Non-sig.		MAX network transcriptional repressor [Source:HGNC Symbol;Acc:HGNC:7188]
ENSG00000070476	ZXDC	85.5534	0.0292695	0.188536	0.155246	0.876627	0.959178	Non-sig.		ZXD family zinc finger C [Source:HGNC Symbol;Acc:HGNC:28160]
ENSG00000070495	JMJD6	82.0032	0.385606	0.212689	1.813	0.0698317	0.298209	Non-sig.		jumonji domain containing 6, arginine demethylase and lysine hydroxylase [Source:HGNC Symbol;Acc:HGNC:19355]
ENSG00000070501	POLB	220.418	-0.548058	0.118437	-4.62743	3.70239e-06	0.000157132	Sig. genes		DNA polymerase beta [Source:HGNC Symbol;Acc:HGNC:9174]
ENSG00000070526	ST6GALNAC1	4.5446	0.0600667	1.29808	0.0462734	0.963092	0.99115	Non-sig.		ST6 N-acetylgalactosaminide alpha-2,6-sialyltransferase 1 [Source:HGNC Symbol;Acc:HGNC:23614]
ENSG00000070540	WIPI1	148.203	-0.0692514	0.169717	-0.40804	0.683245	0.881379	Non-sig.		WD repeat domain, phosphoinositide interacting 1 [Source:HGNC Symbol;Acc:HGNC:25471]
ENSG00000070601	FRMPD1	16.1015	-1.47404	0.545039	-2.70447	0.00684132	0.0667364	Non-sig.		FERM and PDZ domain containing 1 [Source:HGNC Symbol;Acc:HGNC:29159]
ENSG00000070610	GBA2	214.29	-0.250177	0.117287	-2.13303	0.0329221	0.189945	Non-sig.		glucosylceramidase beta 2 [Source:HGNC Symbol;Acc:HGNC:18986]
ENSG00000070614	NDST1	510.733	0.725724	0.107938	6.72351	1.77395e-11	3.01626e-09	Sig. genes		N-deacetylase and N-sulfotransferase 1 [Source:HGNC Symbol;Acc:HGNC:7680]
ENSG00000070669	ASNS	365.659	0.465958	0.145489	3.2027	0.00136147	0.0202525	Sig. genes		asparagine synthetase (glutamine-hydrolyzing) [Source:HGNC Symbol;Acc:HGNC:753]
ENSG00000070718	AP3M2	204.037	-0.152159	0.115597	-1.31628	0.188079	0.504644	Non-sig.		adaptor related protein complex 3 subunit mu 2 [Source:HGNC Symbol;Acc:HGNC:570]
ENSG00000070756	PABPC1	3604.34	0.457473	0.0919994	4.97257	6.60724e-07	3.60779e-05	Sig. genes		poly(A) binding protein cytoplasmic 1 [Source:HGNC Symbol;Acc:HGNC:8554]
ENSG00000070759	TESK2	19.2627	0.0633634	0.303179	0.208997	0.834451	0.944111	Non-sig.		testis associated actin remodelling kinase 2 [Source:HGNC Symbol;Acc:HGNC:11732]
ENSG00000070761	CFAP20	56.8242	-0.026639	0.168027	-0.15854	0.874031	0.958187	Non-sig.		cilia and flagella associated protein 20 [Source:HGNC Symbol;Acc:HGNC:29523]
ENSG00000070770	CSNK2A2	248.463	0.389785	0.120068	3.24636	0.00116891	0.0179978	Sig. genes		casein kinase 2 alpha 2 [Source:HGNC Symbol;Acc:HGNC:2459]
ENSG00000070778	PTPN21	82.7807	0.143882	0.168679	0.852993	0.393663	0.713742	Non-sig.		protein tyrosine phosphatase non-receptor type 21 [Source:HGNC Symbol;Acc:HGNC:9651]
ENSG00000070785	EIF2B3	111.632	-0.412033	0.212984	-1.93457	0.053043	0.253604	Non-sig.		eukaryotic translation initiation factor 2B subunit gamma [Source:HGNC Symbol;Acc:HGNC:3259]
ENSG00000070814	TCOF1	201.145	0.182463	0.159438	1.14442	0.252451	0.580489	Non-sig.		treacle ribosome biogenesis factor 1 [Source:HGNC Symbol;Acc:HGNC:11654]
ENSG00000070831	CDC42	614.268	0.127999	0.13495	0.948493	0.342879	0.67173	Non-sig.
ENSG00000070882	OSBPL3	84.667	0.177023	0.3452	0.512812	0.608083	0.847573	Non-sig.		oxysterol binding protein like 3 [Source:HGNC Symbol;Acc:HGNC:16370]
ENSG00000070950	RAD18	53.0137	0.0956536	0.40357	0.237019	0.812642	0.93587	Non-sig.		RAD18 E3 ubiquitin protein ligase [Source:HGNC Symbol;Acc:HGNC:18278]
ENSG00000070961	ATP2B1	610.41	-0.0583305	0.120399	-0.484475	0.628049	0.857278	Non-sig.		ATPase plasma membrane Ca2+ transporting 1 [Source:HGNC Symbol;Acc:HGNC:814]
ENSG00000071051	NCK2	162.624	-0.117433	0.130729	-0.898293	0.369029	0.693309	Non-sig.		NCK adaptor protein 2 [Source:HGNC Symbol;Acc:HGNC:7665]
ENSG00000071054	MAP4K4	1161.02	0.151613	0.134749	1.12516	0.260522	0.590253	Non-sig.
ENSG00000071073	MGAT4A	102.772	-0.472738	0.200512	-2.35765	0.018391	0.131964	Non-sig.		alpha-1,3-mannosyl-glycoprotein 4-beta-N-acetylglucosaminyltransferase A [Source:HGNC Symbol;Acc:HGNC:7047]
ENSG00000071082	RPL31	7042.63	0.102924	0.0669348	1.53768	0.124127	0.410699	Non-sig.		ribosomal protein L31 [Source:HGNC Symbol;Acc:HGNC:10334]
ENSG00000071127	WDR1	812.191	0.232995	0.0683003	3.41133	0.000646477	0.0113292	Sig. genes		WD repeat domain 1 [Source:HGNC Symbol;Acc:HGNC:12754]
ENSG00000071189	SNX13	257.249	-0.157483	0.0939413	-1.6764	0.0936606	0.350546	Non-sig.		sorting nexin 13 [Source:HGNC Symbol;Acc:HGNC:21335]
ENSG00000071205	ARHGAP10	124.77	0.435525	0.174057	2.5022	0.0123425	0.100115	Non-sig.		Rho GTPase activating protein 10 [Source:HGNC Symbol;Acc:HGNC:26099]
ENSG00000071242	RPS6KA2	492.127	0.1919	0.0825488	2.32468	0.020089	0.139024	Non-sig.		ribosomal protein S6 kinase A2 [Source:HGNC Symbol;Acc:HGNC:10431]
ENSG00000071243	ING3	140.402	-0.0651518	0.141608	-0.460085	0.645455	0.866159	Non-sig.		inhibitor of growth family member 3 [Source:HGNC Symbol;Acc:HGNC:14587]
ENSG00000071246	VASH1	31.8141	-0.427259	0.318628	-1.34094	0.179941	0.493425	Non-sig.		vasohibin 1 [Source:HGNC Symbol;Acc:HGNC:19964]
ENSG00000071282	LMCD1	412.601	1.80746	0.14708	12.289	1.03812e-34	4.6482e-31	Sig. genes		LIM and cysteine rich domains 1 [Source:HGNC Symbol;Acc:HGNC:6633]
ENSG00000071462	BUD23	335.51	0.114553	0.0733978	1.56071	0.118593	0.400866	Non-sig.		BUD23 rRNA methyltransferase and ribosome maturation factor [Source:HGNC Symbol;Acc:HGNC:16405]
ENSG00000071537	SEL1L	792.55	0.298351	0.133272	2.23866	0.0251779	0.159511	Non-sig.		SEL1L adaptor subunit of ERAD E3 ubiquitin ligase [Source:HGNC Symbol;Acc:HGNC:10717]
ENSG00000071539	TRIP13	8.72358	-0.141727	0.525222	-0.269843	0.787281	0.927401	Non-sig.		thyroid hormone receptor interactor 13 [Source:HGNC Symbol;Acc:HGNC:12307]
ENSG00000071553	ATP6AP1	618.303	0.0253567	0.0780578	0.324846	0.745298	0.90997	Non-sig.		ATPase H+ transporting accessory protein 1 [Source:HGNC Symbol;Acc:HGNC:868]
ENSG00000071564	TCF3	159.027	0.0968983	0.126134	0.768219	0.442357	0.750372	Non-sig.		transcription factor 3 [Source:HGNC Symbol;Acc:HGNC:11633]
ENSG00000071575	TRIB2	304.543	-1.04866	0.127434	-8.22908	1.88656e-16	7.34527e-14	Sig. genes		tribbles pseudokinase 2 [Source:HGNC Symbol;Acc:HGNC:30809]
ENSG00000071626	DAZAP1	342.737	0.218302	0.0935934	2.33245	0.0196771	0.136907	Non-sig.		DAZ associated protein 1 [Source:HGNC Symbol;Acc:HGNC:2683]
ENSG00000071655	MBD3	225.239	-0.0390368	0.130904	-0.29821	0.765543	0.918582	Non-sig.		methyl-CpG binding domain protein 3 [Source:HGNC Symbol;Acc:HGNC:6918]
ENSG00000071794	HLTF	311.258	-0.506503	0.191577	-2.64386	0.00819666	0.0753218	Non-sig.		helicase like transcription factor [Source:HGNC Symbol;Acc:HGNC:11099]
ENSG00000071859	FAM50A	245.109	0.26985	0.105403	2.56017	0.0104621	0.0892691	Non-sig.		family with sequence similarity 50 member A [Source:HGNC Symbol;Acc:HGNC:18786]
ENSG00000071889	FAM3A	105.828	0.0120682	0.114012	0.10585	0.915701	0.974027	Non-sig.		FAM3 metabolism regulating signaling molecule A [Source:HGNC Symbol;Acc:HGNC:13749]
[truncated: 16,888 more rows]

## Sheet: stroma FBS vs hPL (signf.)
gene_id	gene_name	baseMean	log2FoldChange	lfcSE	stat	pvalue	padj	sig	highlight	description
[truncated: 214 more rows]

## Sheet: stroma FBS vs hPL
gene_id	gene_name	baseMean	log2FoldChange	lfcSE	stat	pvalue	padj	sig	highlight	description
[truncated: 15,892 more rows]

[truncated: 1 more sheets: common sig genes]
