# Supplementary material for: Cytoprotective Effects of Human Platelet Lysate during the Xeno-Free Culture of Human Donor Corneas
Source: Int J Mol Sci. 2023 Feb 2;24(3):2882. doi: 10.3390/ijms24032882 (PMC9917909; doi:10.3390/ijms24032882)
Supplement: Supplementary file 1 [file ijms-24-02882-s001.zip › Supplementary Data S2 .xlsx]

## Sheet: Explanation
	Suppl. Data S2: Excel file with the GSEA (Gene Set Enrichment Analysis) and the associated DGEA (Differential Gene Expression Analyses) from the next generation sequencing data of the stroma and Descemet membrane/endothelium (DmE) complex of donor corneas after 25 days of differential culture conditions in either 2%HPL or 2%FBS containing medium.

## Sheet: GSEA
ID	Description	p.adjust.endothelial	p.adjust.stroma
HALLMARK_EPITHELIAL_MESENCHYMAL_TRANSITION	EPITHELIAL MESENCHYMAL TRANSITION	4.38807e-09	0.130584
HALLMARK_TNFA_SIGNALING_VIA_NFKB	TNFA SIGNALING VIA NFKB	4.38807e-09	0.390204
HALLMARK_HYPOXIA	HYPOXIA	7.14493e-08	0.130584
HALLMARK_APICAL_JUNCTION	APICAL JUNCTION	1.00681e-07	0.390204
HALLMARK_INFLAMMATORY_RESPONSE	INFLAMMATORY RESPONSE	2.39089e-06	0.653465
HALLMARK_G2M_CHECKPOINT	G2M CHECKPOINT	9.57685e-06	0.130584
HALLMARK_GLYCOLYSIS	GLYCOLYSIS	4.422e-05	1
HALLMARK_OXIDATIVE_PHOSPHORYLATION	OXIDATIVE PHOSPHORYLATION	0.000427897	1
HALLMARK_KRAS_SIGNALING_UP	KRAS SIGNALING UP	0.00141157	0.426995
HALLMARK_P53_PATHWAY	P53 PATHWAY	0.00150741	0.653465
HALLMARK_TGF_BETA_SIGNALING	TGF BETA SIGNALING	0.00163945	1
HALLMARK_ALLOGRAFT_REJECTION	ALLOGRAFT REJECTION	0.00241271	0.653465
HALLMARK_MYOGENESIS	MYOGENESIS	0.00449722	0.390204
HALLMARK_COAGULATION	COAGULATION	0.00449722	1
HALLMARK_UV_RESPONSE_DN	UV RESPONSE DN	0.00449722	1
HALLMARK_E2F_TARGETS	E2F TARGETS	0.00679406	0.624789
HALLMARK_ESTROGEN_RESPONSE_EARLY	ESTROGEN RESPONSE EARLY	0.00823171	0.0127237
HALLMARK_COMPLEMENT	COMPLEMENT	0.00940835	1
HALLMARK_IL2_STAT5_SIGNALING	IL2 STAT5 SIGNALING	0.0105121	1
HALLMARK_UNFOLDED_PROTEIN_RESPONSE	UNFOLDED PROTEIN RESPONSE	0.0135962	0.437767
HALLMARK_APOPTOSIS	APOPTOSIS	0.0138066	0.865441
HALLMARK_IL6_JAK_STAT3_SIGNALING	IL6 JAK STAT3 SIGNALING	0.0139005	0.797555
HALLMARK_MITOTIC_SPINDLE	MITOTIC SPINDLE	0.0182193	0.43574
HALLMARK_ANDROGEN_RESPONSE	ANDROGEN RESPONSE	0.0182193	0.865441
HALLMARK_ESTROGEN_RESPONSE_LATE	ESTROGEN RESPONSE LATE	0.0359561	0.0127237
HALLMARK_PANCREAS_BETA_CELLS	PANCREAS BETA CELLS	0.0503777	1
HALLMARK_XENOBIOTIC_METABOLISM	XENOBIOTIC METABOLISM	0.0833013	1
HALLMARK_REACTIVE_OXYGEN_SPECIES_PATHWAY	REACTIVE OXYGEN SPECIES PATHWAY	0.0923645	0.390204
HALLMARK_KRAS_SIGNALING_DN	KRAS SIGNALING DN	0.103937	0.0235491
HALLMARK_MTORC1_SIGNALING	MTORC1 SIGNALING	0.123355	1
HALLMARK_UV_RESPONSE_UP	UV RESPONSE UP	0.136263	1
HALLMARK_WNT_BETA_CATENIN_SIGNALING	WNT BETA CATENIN SIGNALING	0.142857	0.443131
HALLMARK_HEDGEHOG_SIGNALING	HEDGEHOG SIGNALING	0.177722	0.445312
HALLMARK_MYC_TARGETS_V2	MYC TARGETS V2	0.188257	1
HALLMARK_NOTCH_SIGNALING	NOTCH SIGNALING	0.275808	0.251317
HALLMARK_CHOLESTEROL_HOMEOSTASIS	CHOLESTEROL HOMEOSTASIS	0.275808	1
HALLMARK_ANGIOGENESIS	ANGIOGENESIS	0.390625	0.653465
HALLMARK_ADIPOGENESIS	ADIPOGENESIS	0.448763	1
HALLMARK_BILE_ACID_METABOLISM	BILE ACID METABOLISM	0.546791	1
HALLMARK_APICAL_SURFACE	APICAL SURFACE	0.784259	0.0397301
HALLMARK_MYC_TARGETS_V1	MYC TARGETS V1	0.784259	1
HALLMARK_PI3K_AKT_MTOR_SIGNALING	PI3K AKT MTOR SIGNALING	0.985312	1
HALLMARK_SPERMATOGENESIS	SPERMATOGENESIS	0.985312	0.251317
HALLMARK_INTERFERON_ALPHA_RESPONSE	INTERFERON ALPHA RESPONSE	1	0.865441
HALLMARK_INTERFERON_GAMMA_RESPONSE	INTERFERON GAMMA RESPONSE	1	0.426995
HALLMARK_FATTY_ACID_METABOLISM	FATTY ACID METABOLISM	1	1
HALLMARK_DNA_REPAIR	DNA REPAIR	1	1
HALLMARK_HEME_METABOLISM	HEME METABOLISM	1	1
HALLMARK_PEROXISOME	PEROXISOME	1	1
HALLMARK_PROTEIN_SECRETION	PROTEIN SECRETION	1	0.390204

## Sheet: EPI_MESENCHYMAL_TRANSITION Endo
	V1	gene_id	gene_name	description	baseMean	log2FoldChange	lfcSE	stat	pvalue	padj	sig
1	3299	ENSG00000106366.9	SERPINE1	serpin family E member 1 [Source:HGNC Symbol;Acc:HGNC:8583]	1135.4	2.90334	0.175057	16.5851	8.93365e-62	1.60002e-57	Sig. genes
2	8868	ENSG00000146674.16	IGFBP3	insulin like growth factor binding protein 3 [Source:HGNC Symbol;Acc:HGNC:5472]	1383.81	2.49669	0.170106	14.6773	9.01215e-49	8.07038e-45	Sig. genes
3	5489	ENSG00000124225.16	PMEPA1	prostate transmembrane protein, androgen induced 1 [Source:HGNC Symbol;Acc:HGNC:14107]	404.657	2.08905	0.181416	11.5153	1.10528e-30	2.82793e-27	Sig. genes
4	4825	ENSG00000118523.6	CCN2	cellular communication network factor 2 [Source:HGNC Symbol;Acc:HGNC:2500]	10148.5	2.12098	0.189101	11.2161	3.39932e-29	6.08819e-26	Sig. genes
5	2126	ENSG00000099860.9	GADD45B	growth arrest and DNA damage inducible beta [Source:HGNC Symbol;Acc:HGNC:4096]	597.575	1.31625	0.125522	10.4862	9.99809e-26	1.49221e-22	Sig. genes
6	8288	ENSG00000142871.18	CCN1	cellular communication network factor 1 [Source:HGNC Symbol;Acc:HGNC:2654]	901.853	1.78902	0.173476	10.3128	6.1666e-25	8.49567e-22	Sig. genes
7	1111	ENSG00000070404.10	FSTL3	follistatin like 3 [Source:HGNC Symbol;Acc:HGNC:3973]	212.688	1.80876	0.182683	9.90108	4.11822e-23	4.09763e-20	Sig. genes
8	15254	ENSG00000182492.16	BGN	biglycan [Source:HGNC Symbol;Acc:HGNC:1044]	1956.74	1.38041	0.140414	9.83095	8.28317e-23	7.06436e-20	Sig. genes
9	7174	ENSG00000135919.14	SERPINE2	serpin family E member 2 [Source:HGNC Symbol;Acc:HGNC:8951]	4384.74	1.2596	0.1362	9.24818	2.2835e-20	1.31928e-17	Sig. genes
10	1410	ENSG00000078098.14	FAP		368.283	1.47513	0.164399	8.97288	2.88862e-19	1.61672e-16	Sig. genes
11	3200	ENSG00000105825.14	TFPI2	tissue factor pathway inhibitor 2 [Source:HGNC Symbol;Acc:HGNC:11761]	200.672	2.05196	0.244607	8.3888	4.91149e-17	2.14548e-14	Sig. genes
12	8660	ENSG00000145147.20	SLIT2	slit guidance ligand 2 [Source:HGNC Symbol;Acc:HGNC:11086]	132.029	2.70844	0.326807	8.28759	1.15568e-16	4.5996e-14	Sig. genes
13	9235	ENSG00000149591.17	TAGLN	transgelin [Source:HGNC Symbol;Acc:HGNC:11553]	611.275	1.89946	0.239627	7.92673	2.24985e-15	7.90093e-13	Sig. genes
14	9597	ENSG00000152952.12	PLOD2	procollagen-lysine,2-oxoglutarate 5-dioxygenase 2 [Source:HGNC Symbol;Acc:HGNC:9082]	719.14	1.09167	0.140759	7.75563	8.79061e-15	2.81142e-12	Sig. genes
15	4698	ENSG00000117385.16	P3H1	prolyl 3-hydroxylase 1 [Source:HGNC Symbol;Acc:HGNC:19316]	142.917	0.69097	0.0891889	7.74727	9.38919e-15	2.95018e-12	Sig. genes
16	7531	ENSG00000137801.11	THBS1	thrombospondin 1 [Source:HGNC Symbol;Acc:HGNC:11785]	3524.01	0.965449	0.125046	7.72072	1.15671e-14	3.51131e-12	Sig. genes
17	553	ENSG00000038427.16	VCAN	versican [Source:HGNC Symbol;Acc:HGNC:2464]	108.88	2.48498	0.323098	7.6911	1.45877e-14	4.35444e-12	Sig. genes
18	6446	ENSG00000131435.13	PDLIM4	PDZ and LIM domain 4 [Source:HGNC Symbol;Acc:HGNC:16501]	785.789	0.5791	0.0774068	7.48126	7.36154e-14	1.8835e-11	Sig. genes
19	133	ENSG00000006327.14	TNFRSF12A	TNF receptor superfamily member 12A [Source:HGNC Symbol;Acc:HGNC:18152]	181.625	1.11784	0.154012	7.25813	3.92491e-13	9.0122e-11	Sig. genes
20	2905	ENSG00000104332.12	SFRP1	secreted frizzled related protein 1 [Source:HGNC Symbol;Acc:HGNC:10776]	3602.1	-1.18326	0.166706	-7.09786	1.26703e-12	2.6697e-10	Sig. genes
21	3291	ENSG00000106333.13	PCOLCE	procollagen C-endopeptidase enhancer [Source:HGNC Symbol;Acc:HGNC:8738]	1257.45	-1.03235	0.146859	-7.02956	2.07186e-12	4.16932e-10	Sig. genes
22	6098	ENSG00000129038.16	LOXL1	lysyl oxidase like 1 [Source:HGNC Symbol;Acc:HGNC:6665]	885.506	0.85173	0.123322	6.90655	4.96598e-12	9.26465e-10	Sig. genes
23	4607	ENSG00000116717.13	GADD45A	growth arrest and DNA damage inducible alpha [Source:HGNC Symbol;Acc:HGNC:4095]	421.248	0.92598	0.136444	6.78654	1.14857e-11	2.07786e-09	Sig. genes
24	7918	ENSG00000140092.15	FBLN5	fibulin 5 [Source:HGNC Symbol;Acc:HGNC:3602]	411.059	1.19318	0.178235	6.69443	2.1652e-11	3.52535e-09	Sig. genes
25	6973	ENSG00000134871.19	COL4A2	collagen type IV alpha 2 chain [Source:HGNC Symbol;Acc:HGNC:2203]	253.073	1.59734	0.24189	6.60357	4.01365e-11	6.19694e-09	Sig. genes
26	4423	ENSG00000115414.21	FN1	fibronectin 1 [Source:HGNC Symbol;Acc:HGNC:3778]	995.87	1.19631	0.182343	6.5608	5.3521e-11	8.05514e-09	Sig. genes
27	9280	ENSG00000150093.20	ITGB1	integrin subunit beta 1 [Source:HGNC Symbol;Acc:HGNC:6153]	2972.02	0.74358	0.117916	6.30604	2.86271e-10	3.85498e-08	Sig. genes
28	1216	ENSG00000073008.15	PVR	PVR cell adhesion molecule [Source:HGNC Symbol;Acc:HGNC:9705]	464.341	0.719525	0.114875	6.26354	3.76339e-10	4.88423e-08	Sig. genes
29	15296	ENSG00000182667.15	NTM	neurotrimin [Source:HGNC Symbol;Acc:HGNC:17941]	45.6677	2.17615	0.351173	6.19682	5.76169e-10	7.21621e-08	Sig. genes
30	12852	ENSG00000170558.10	CDH2	cadherin 2 [Source:HGNC Symbol;Acc:HGNC:1759]	1667.72	0.693678	0.112492	6.16647	6.98303e-10	8.33773e-08	Sig. genes
31	4143	ENSG00000113140.11	SPARC	secreted protein acidic and cysteine rich [Source:HGNC Symbol;Acc:HGNC:11219]	2477.07	0.655493	0.108408	6.04652	1.48009e-09	1.63632e-07	Sig. genes
32	4269	ENSG00000114270.18	COL7A1	collagen type VII alpha 1 chain [Source:HGNC Symbol;Acc:HGNC:2214]	228.467	1.04324	0.176395	5.91423	3.33435e-09	3.39308e-07	Sig. genes
33	9524	ENSG00000152377.14	SPOCK1	SPARC (osteonectin), cwcv and kazal like domains proteoglycan 1 [Source:HGNC Symbol;Acc:HGNC:11251]	835.241	0.682196	0.119645	5.70183	1.18529e-08	1.04062e-06	Sig. genes
34	6045	ENSG00000128595.17	CALU	calumenin [Source:HGNC Symbol;Acc:HGNC:1458]	1222.85	0.575869	0.101634	5.66609	1.46093e-08	1.25795e-06	Sig. genes
35	4138	ENSG00000113083.15	LOX	lysyl oxidase [Source:HGNC Symbol;Acc:HGNC:6664]	85.0351	1.84551	0.327344	5.63783	1.7221e-08	1.46175e-06	Sig. genes
36	3887	ENSG00000111341.10	MGP	matrix Gla protein [Source:HGNC Symbol;Acc:HGNC:7060]	38573.8	-0.993031	0.177115	-5.60671	2.06205e-08	1.72576e-06	Sig. genes
37	1579	ENSG00000082781.12	ITGB5	integrin subunit beta 5 [Source:HGNC Symbol;Acc:HGNC:6160]	2177.84	0.508843	0.0908662	5.59992	2.14453e-08	1.77817e-06	Sig. genes
38	17252	ENSG00000196924.19	FLNA	filamin A [Source:HGNC Symbol;Acc:HGNC:3754]	1761.86	0.69912	0.127569	5.48034	4.245e-08	3.27707e-06	Sig. genes
39	6818	ENSG00000134013.16	LOXL2	lysyl oxidase like 2 [Source:HGNC Symbol;Acc:HGNC:6666]	125.888	0.990358	0.182083	5.43903	5.35706e-08	4.04831e-06	Sig. genes
40	3317	ENSG00000106484.16	MEST	mesoderm specific transcript [Source:HGNC Symbol;Acc:HGNC:7028]	82.1375	1.17777	0.218354	5.39384	6.89684e-08	4.98074e-06	Sig. genes
41	6300	ENSG00000130635.16	COL5A1	collagen type V alpha 1 chain [Source:HGNC Symbol;Acc:HGNC:2209]	218.567	1.24307	0.242396	5.12827	2.92419e-07	1.77533e-05	Sig. genes
42	665	ENSG00000049540.18	ELN		44.1325	1.86312	0.363561	5.12464	2.98102e-07	1.80372e-05	Sig. genes
43	1633	ENSG00000084636.18	COL16A1	collagen type XVI alpha 1 chain [Source:HGNC Symbol;Acc:HGNC:2193]	50.7974	1.33805	0.263694	5.07425	3.89023e-07	2.27693e-05	Sig. genes
44	3592	ENSG00000108821.14	COL1A1	collagen type I alpha 1 chain [Source:HGNC Symbol;Acc:HGNC:2197]	385.094	1.08448	0.215027	5.04347	4.57159e-07	2.6412e-05	Sig. genes
45	12092	ENSG00000167460.17	TPM4	tropomyosin 4 [Source:HGNC Symbol;Acc:HGNC:12013]	2433.18	0.616928	0.123678	4.98817	6.09524e-07	3.35434e-05	Sig. genes
46	16454	ENSG00000187498.16	COL4A1	collagen type IV alpha 1 chain [Source:HGNC Symbol;Acc:HGNC:2202]	121.715	1.83437	0.379136	4.83829	1.30962e-06	6.47937e-05	Sig. genes
47	9183	ENSG00000149257.16	SERPINH1	serpin family H member 1 [Source:HGNC Symbol;Acc:HGNC:1546]	324.876	0.398091	0.0830754	4.79192	1.65189e-06	7.92762e-05	Sig. genes
48	7049	ENSG00000135318.12	NT5E	5'-nucleotidase ecto [Source:HGNC Symbol;Acc:HGNC:8021]	469.626	0.466139	0.0988299	4.71658	2.39848e-06	0.000108477	Sig. genes
49	6716	ENSG00000133110.15	POSTN	periostin [Source:HGNC Symbol;Acc:HGNC:16953]	85.0295	2.13712	0.457434	4.67196	2.98338e-06	0.000130323	Sig. genes
50	1594	ENSG00000083444.17	PLOD1	procollagen-lysine,2-oxoglutarate 5-dioxygenase 1 [Source:HGNC Symbol;Acc:HGNC:9081]	610.427	0.490351	0.109173	4.49152	7.07182e-06	0.000282085	Sig. genes
51	11767	ENSG00000166147.15	FBN1	fibrillin 1 [Source:HGNC Symbol;Acc:HGNC:3603]	361.331	0.505871	0.112853	4.48255	7.37564e-06	0.000292899	Sig. genes
52	6536	ENSG00000132031.13	MATN3	matrilin 3 [Source:HGNC Symbol;Acc:HGNC:6909]	10.5354	2.44451	0.553134	4.41938	9.89862e-06	0.000385401	Sig. genes
53	1083	ENSG00000069702.11	TGFBR3	transforming growth factor beta receptor 3 [Source:HGNC Symbol;Acc:HGNC:11774]	2296.02	-0.476198	0.111156	-4.28406	1.83516e-05	0.000649559	Sig. genes
54	783	ENSG00000058085.15	LAMC2	laminin subunit gamma 2 [Source:HGNC Symbol;Acc:HGNC:6493]	510.437	0.979015	0.228769	4.27949	1.87326e-05	0.000661738	Sig. genes
55	580	ENSG00000041982.16	TNC	tenascin C [Source:HGNC Symbol;Acc:HGNC:5318]	31.4456	1.22366	0.294374	4.15683	3.22692e-05	0.0010585	Sig. genes
56	2502	ENSG00000101335.10	MYL9	myosin light chain 9 [Source:HGNC Symbol;Acc:HGNC:15754]	778.702	0.524365	0.128743	4.07295	4.64205e-05	0.00144842	Sig. genes
57	7961	ENSG00000140416.23	TPM1	tropomyosin 1 [Source:HGNC Symbol;Acc:HGNC:12010]	2662.42	0.527297	0.130448	4.0422	5.2951e-05	0.00160738	Sig. genes
58	11477	ENSG00000164932.13	CTHRC1	collagen triple helix repeat containing 1 [Source:HGNC Symbol;Acc:HGNC:18831]	67.5104	1.29215	0.322445	4.00734	6.14053e-05	0.00182081	Sig. genes
59	8483	ENSG00000143878.10	RHOB	ras homolog family member B [Source:HGNC Symbol;Acc:HGNC:668]	67.662	0.689797	0.173748	3.97011	7.18391e-05	0.00205205	Sig. genes
60	5311	ENSG00000122786.20	CALD1	caldesmon 1 [Source:HGNC Symbol;Acc:HGNC:1441]	7172.68	0.53368	0.13483	3.95816	7.55309e-05	0.00213706	Sig. genes
61	14253	ENSG00000177283.8	FZD8	frizzled class receptor 8 [Source:HGNC Symbol;Acc:HGNC:4046]	25.5937	0.9985	0.258939	3.85612	0.000115202	0.00299459	Sig. genes
62	13343	ENSG00000172638.13	EFEMP2	EGF containing fibulin extracellular matrix protein 2 [Source:HGNC Symbol;Acc:HGNC:3219]	282.275	0.45395	0.117862	3.85155	0.000117371	0.00303543	Sig. genes
63	11272	ENSG00000164171.11	ITGA2	integrin subunit alpha 2 [Source:HGNC Symbol;Acc:HGNC:6137]	440.017	0.976285	0.255538	3.8205	0.000133181	0.00335009	Sig. genes
64	9145	ENSG00000148848.15	ADAM12	ADAM metallopeptidase domain 12 [Source:HGNC Symbol;Acc:HGNC:190]	187.962	0.628893	0.168625	3.72955	0.000191825	0.00448526	Sig. genes
65	11435	ENSG00000164761.9	TNFRSF11B	TNF receptor superfamily member 11b [Source:HGNC Symbol;Acc:HGNC:11909]	106.185	1.02797	0.275628	3.72954	0.000191832	0.00448526	Sig. genes
66	17742	ENSG00000198467.16	TPM2	tropomyosin 2 [Source:HGNC Symbol;Acc:HGNC:12011]	665.73	0.442732	0.121479	3.64451	0.000267898	0.00578078	Sig. genes
67	14864	ENSG00000180447.7	GAS1	growth arrest specific 1 [Source:HGNC Symbol;Acc:HGNC:4165]	211.316	-0.706932	0.197993	-3.57049	0.000356311	0.00720263	Sig. genes
68	7671	ENSG00000138448.12	ITGAV	integrin subunit alpha V [Source:HGNC Symbol;Acc:HGNC:6150]	278.485	0.473595	0.133788	3.5399	0.00040028	0.00786939	Sig. genes
69	10615	ENSG00000161638.11	ITGA5	integrin subunit alpha 5 [Source:HGNC Symbol;Acc:HGNC:6141]	69.2159	0.777503	0.225523	3.44756	0.000565678	0.010213	Sig. genes
70	4018	ENSG00000112186.12	CAP2		150.944	0.464982	0.135239	3.43821	0.000585569	0.0105191	Sig. genes
71	10077	ENSG00000157227.14	MMP14	matrix metallopeptidase 14 [Source:HGNC Symbol;Acc:HGNC:7160]	644.283	0.470903	0.140511	3.35137	0.000804128	0.0134976	Sig. genes
72	44949	ENSG00000259207.9	ITGB3	integrin subunit beta 3 [Source:HGNC Symbol;Acc:HGNC:6156]	45.0309	1.09345	0.329169	3.32186	0.00089419	0.0145989	Sig. genes
73	822	ENSG00000060718.22	COL11A1	collagen type XI alpha 1 chain [Source:HGNC Symbol;Acc:HGNC:2186]	10.4017	2.15021	0.663464	3.24089	0.00119159	0.0182405	Sig. genes
74	5287	ENSG00000122641.11	INHBA	inhibin subunit beta A [Source:HGNC Symbol;Acc:HGNC:6066]	304.249	0.786238	0.248132	3.16862	0.00153163	0.0222839	Sig. genes
75	3481	ENSG00000107984.10	DKK1	dickkopf WNT signaling pathway inhibitor 1 [Source:HGNC Symbol;Acc:HGNC:2891]	4.5805	2.41814	0.77418	3.12348	0.00178726	0.025165	Sig. genes
76	11930	ENSG00000166794.6	PPIB	peptidylprolyl isomerase B [Source:HGNC Symbol;Acc:HGNC:9255]	237.012	0.372797	0.120353	3.09753	0.00195138	0.0267605	Sig. genes
77	4558	ENSG00000116260.17	QSOX1	quiescin sulfhydryl oxidase 1 [Source:HGNC Symbol;Acc:HGNC:9756]	657.005	0.35155	0.114771	3.06307	0.00219082	0.0291947	Sig. genes
78	17474	ENSG00000197614.11	MFAP5	microfibril associated protein 5 [Source:HGNC Symbol;Acc:HGNC:29673]	6.93539	2.50366	0.821795	3.04658	0.0023146	0.0304589	Sig. genes
79	5087	ENSG00000120708.17	TGFBI	transforming growth factor beta induced [Source:HGNC Symbol;Acc:HGNC:11771]	4317.82	0.60512	0.199697	3.03018	0.00244404	0.0316735	Sig. genes
80	7800	ENSG00000139278.10	GLIPR1	GLI pathogenesis related 1 [Source:HGNC Symbol;Acc:HGNC:17001]	298.597	0.648438	0.215301	3.01178	0.00259725	0.0330609	Sig. genes
81	11874	ENSG00000166508.18	MCM7	minichromosome maintenance complex component 7 [Source:HGNC Symbol;Acc:HGNC:6950]	149.082	0.402173	0.138887	2.89569	0.00378331	0.0434631	Sig. genes
82	2230	ENSG00000100234.12	TIMP3	TIMP metallopeptidase inhibitor 3 [Source:HGNC Symbol;Acc:HGNC:11822]	7186.01	0.363656	0.125993	2.88632	0.00389775	0.044323	Sig. genes
83	4215	ENSG00000113657.13	DPYSL3	dihydropyrimidinase like 3 [Source:HGNC Symbol;Acc:HGNC:3015]	1627.14	-0.319821	0.111044	-2.88014	0.00397497	0.0448849	Sig. genes
84	14327	ENSG00000177606.8	JUN	Jun proto-oncogene, AP-1 transcription factor subunit [Source:HGNC Symbol;Acc:HGNC:6204]	288.275	0.528634	0.189176	2.79441	0.00519946	0.0548424	Non-sig.
85	9615	ENSG00000153071.15	DAB2	DAB adaptor protein 2 [Source:HGNC Symbol;Acc:HGNC:2662]	1944.45	0.277372	0.0998222	2.77866	0.00545839	0.0569363	Non-sig.
86	8202	ENSG00000142173.16	COL6A2	collagen type VI alpha 2 chain [Source:HGNC Symbol;Acc:HGNC:2212]	274.535	0.609886	0.222233	2.74436	0.0060629	0.0613503	Non-sig.
87	12866	ENSG00000170624.14	SGCD	sarcoglycan delta [Source:HGNC Symbol;Acc:HGNC:10807]	29.5013	1.01739	0.37233	2.7325	0.00628557	0.0631023	Non-sig.
88	15706	ENSG00000184347.15	SLIT3	slit guidance ligand 3 [Source:HGNC Symbol;Acc:HGNC:11087]	57.0671	0.687109	0.253493	2.71057	0.00671681	0.0660367	Non-sig.
89	3079	ENSG00000105329.11	TGFB1	transforming growth factor beta 1 [Source:HGNC Symbol;Acc:HGNC:11766]	78.4867	0.547903	0.202787	2.70186	0.00689531	0.0668987	Non-sig.
90	1732	ENSG00000087245.13	MMP2	matrix metallopeptidase 2 [Source:HGNC Symbol;Acc:HGNC:7166]	623.692	0.867449	0.32206	2.69344	0.00707194	0.0677318	Non-sig.
91	5460	ENSG00000124145.6	SDC4	syndecan 4 [Source:HGNC Symbol;Acc:HGNC:10661]	1007.63	0.402933	0.15063	2.67498	0.00747338	0.0705207	Non-sig.
92	10999	ENSG00000163430.12	FSTL1	follistatin like 1 [Source:HGNC Symbol;Acc:HGNC:3972]	1058.43	0.327365	0.123708	2.64627	0.00813856	0.0749032	Non-sig.
93	4174	ENSG00000113361.13	CDH6	cadherin 6 [Source:HGNC Symbol;Acc:HGNC:1765]	4.26322	2.43846	0.927094	2.63022	0.00853292	0.0772621	Non-sig.
94	3959	ENSG00000111799.22	COL12A1	collagen type XII alpha 1 chain [Source:HGNC Symbol;Acc:HGNC:2188]	984.158	-0.423263	0.169526	-2.49674	0.0125341	0.101211	Non-sig.
95	2187	ENSG00000100097.12	LGALS1	galectin 1 [Source:HGNC Symbol;Acc:HGNC:6561]	1468.6	0.367977	0.153245	2.40123	0.0163401	0.122499	Non-sig.
96	10923	ENSG00000163132.8	MSX1	msh homeobox 1 [Source:HGNC Symbol;Acc:HGNC:7391]	99.1873	0.636198	0.274819	2.31498	0.0206142	0.141186	Non-sig.
97	13211	ENSG00000172061.9	LRRC15	leucine rich repeat containing 15 [Source:HGNC Symbol;Acc:HGNC:20818]	8.2014	1.20933	0.536276	2.25505	0.0241301	0.155305	Non-sig.
98	4845	ENSG00000118785.15	SPP1	secreted phosphoprotein 1 [Source:HGNC Symbol;Acc:HGNC:11255]	76.752	0.896055	0.40421	2.21681	0.0266364	0.165878	Non-sig.
99	4430	ENSG00000115457.10	IGFBP2	insulin like growth factor binding protein 2 [Source:HGNC Symbol;Acc:HGNC:5471]	1412.55	-0.238518	0.10871	-2.19408	0.0282299	0.172382	Non-sig.
100	9733	ENSG00000154175.18	ABI3BP	ABI family member 3 binding protein [Source:HGNC Symbol;Acc:HGNC:17265]	370.109	0.366211	0.170003	2.15414	0.0312289	0.183307	Non-sig.
101	10904	ENSG00000163069.13	SGCB	sarcoglycan beta [Source:HGNC Symbol;Acc:HGNC:10806]	87.1825	0.312724	0.145361	2.15136	0.0314477	0.183939	Non-sig.
102	3450	ENSG00000107796.13	ACTA2	actin alpha 2, smooth muscle [Source:HGNC Symbol;Acc:HGNC:130]	178.706	0.902806	0.421915	2.13978	0.0323726	0.187757	Non-sig.
103	8168	ENSG00000141753.7	IGFBP4	insulin like growth factor binding protein 4 [Source:HGNC Symbol;Acc:HGNC:5473]	1877.42	0.437727	0.208968	2.09471	0.0361972	0.201208	Non-sig.
104	14145	ENSG00000176788.9	BASP1	brain abundant membrane attached signal protein 1 [Source:HGNC Symbol;Acc:HGNC:957]	1239.89	0.256257	0.122325	2.09488	0.0361817	0.201208	Non-sig.
105	302	ENSG00000011465.18	DCN	decorin [Source:HGNC Symbol;Acc:HGNC:2705]	3378.1	0.392345	0.187539	2.09207	0.0364323	0.202201	Non-sig.
106	1237	ENSG00000073712.15	FERMT2	FERM domain containing kindlin 2 [Source:HGNC Symbol;Acc:HGNC:15767]	325.039	0.302538	0.148717	2.03431	0.0419199	0.219978	Non-sig.
107	5240	ENSG00000122176.12	FMOD	fibromodulin [Source:HGNC Symbol;Acc:HGNC:3774]	705.315	0.332343	0.163998	2.02651	0.0427126	0.222675	Non-sig.
108	11089	ENSG00000163661.4	PTX3	pentraxin 3 [Source:HGNC Symbol;Acc:HGNC:9692]	414.186	0.41682	0.206145	2.02198	0.0431787	0.223527	Non-sig.
109	11975	ENSG00000166923.12	GREM1	gremlin 1, DAN family BMP antagonist [Source:HGNC Symbol;Acc:HGNC:2001]	28.156	0.514012	0.2552	2.01415	0.0439937	0.225896	Non-sig.
110	11918	ENSG00000166741.8	NNMT	nicotinamide N-methyltransferase [Source:HGNC Symbol;Acc:HGNC:7861]	1686.34	0.270557	0.134367	2.01356	0.0440558	0.226063	Non-sig.
111	298	ENSG00000011422.12	PLAUR	plasminogen activator, urokinase receptor [Source:HGNC Symbol;Acc:HGNC:9053]	196.872	0.313323	0.156377	2.00364	0.0451086	0.229125	Non-sig.
112	10980	ENSG00000163359.17	COL6A3	collagen type VI alpha 3 chain [Source:HGNC Symbol;Acc:HGNC:2213]	271.839	0.458329	0.235136	1.94921	0.0512705	0.249104	Non-sig.
113	6247	ENSG00000130309.11	COLGALT1		166.918	0.276456	0.142459	1.9406	0.0523063	0.251977	Non-sig.
114	7161	ENSG00000135862.6	LAMC1	laminin subunit gamma 1 [Source:HGNC Symbol;Acc:HGNC:6492]	396.793	0.420402	0.218176	1.9269	0.0539926	0.255822	Non-sig.
115	19793	ENSG00000204262.14	COL5A2	collagen type V alpha 2 chain [Source:HGNC Symbol;Acc:HGNC:2210]	693.355	-0.25149	0.131589	-1.91118	0.0559813	0.261646	Non-sig.
116	14629	ENSG00000179163.12	FUCA1	alpha-L-fucosidase 1 [Source:HGNC Symbol;Acc:HGNC:4006]	201.794	0.164641	0.08819	1.86689	0.0619176	0.278815	Non-sig.
117	6863	ENSG00000134250.20	NOTCH2		329.285	0.274712	0.150071	1.83054	0.0671685	0.292769	Non-sig.
118	4101	ENSG00000112715.25	VEGFA		413.696	0.371446	0.203218	1.82782	0.067577	0.293392	Non-sig.
119	1645	ENSG00000085063.17	CD59	CD59 molecule (CD59 blood group) [Source:HGNC Symbol;Acc:HGNC:1689]	1786.18	0.190625	0.104474	1.82462	0.0680578	0.294132	Non-sig.
120	9716	ENSG00000154096.14	THY1	Thy-1 cell surface antigen [Source:HGNC Symbol;Acc:HGNC:11801]	21.341	0.673254	0.36962	1.82148	0.0685342	0.294765	Non-sig.
121	1500	ENSG00000080573.7	COL5A3	collagen type V alpha 3 chain [Source:HGNC Symbol;Acc:HGNC:14864]	11.4671	-0.785394	0.436617	-1.79882	0.0720475	0.302975	Non-sig.
122	8033	ENSG00000140937.14	CDH11	cadherin 11 [Source:HGNC Symbol;Acc:HGNC:1750]	441.534	0.387948	0.223677	1.73441	0.0828449	0.328846	Non-sig.
123	11942	ENSG00000166825.15	ANPEP	alanyl aminopeptidase, membrane [Source:HGNC Symbol;Acc:HGNC:500]	41.3643	0.76692	0.448037	1.71173	0.086946	0.338081	Non-sig.
124	2654	ENSG00000102265.12	TIMP1	TIMP metallopeptidase inhibitor 1 [Source:HGNC Symbol;Acc:HGNC:11820]	3953.77	0.185831	0.108865	1.70698	0.087825	0.340023	Non-sig.
125	225	ENSG00000008517.19	IL32	interleukin 32 [Source:HGNC Symbol;Acc:HGNC:16830]	15.7581	0.565159	0.337089	1.67659	0.0936229	0.350546	Non-sig.
126	13182	ENSG00000171951.5	SCG2	secretogranin II [Source:HGNC Symbol;Acc:HGNC:10575]	681.082	0.33316	0.199168	1.67276	0.0943754	0.351992	Non-sig.
127	9564	ENSG00000152661.9	GJA1	gap junction protein alpha 1 [Source:HGNC Symbol;Acc:HGNC:4274]	1376.77	0.193758	0.11704	1.65549	0.0978254	0.359322	Non-sig.
128	17962	ENSG00000198959.12	TGM2	transglutaminase 2 [Source:HGNC Symbol;Acc:HGNC:11778]	134.77	0.602548	0.368769	1.63394	0.102271	0.368767	Non-sig.
129	17163	ENSG00000196611.6	MMP1	matrix metallopeptidase 1 [Source:HGNC Symbol;Acc:HGNC:7155]	405.356	0.410041	0.253707	1.6162	0.106051	0.376876	Non-sig.
130	6612	ENSG00000132561.14	MATN2	matrilin 2 [Source:HGNC Symbol;Acc:HGNC:6908]	90.1251	0.418489	0.260466	1.6067	0.108121	0.380816	Non-sig.
131	14119	ENSG00000176692.8	FOXC2	forkhead box C2 [Source:HGNC Symbol;Acc:HGNC:3801]	16.7234	0.556853	0.34993	1.59133	0.111536	0.388112	Non-sig.
132	11032	ENSG00000163520.14	FBLN2	fibulin 2 [Source:HGNC Symbol;Acc:HGNC:3601]	6.60787	-0.90149	0.609204	-1.47978	0.138931	0.432965	Non-sig.
133	2574	ENSG00000101825.8	MXRA5	matrix remodeling associated 5 [Source:HGNC Symbol;Acc:HGNC:7539]	187.87	-0.44792	0.303938	-1.47372	0.140557	0.436232	Non-sig.
134	4540	ENSG00000116157.6	GPX7	glutathione peroxidase 7 [Source:HGNC Symbol;Acc:HGNC:4559]	19.4773	0.430008	0.295509	1.45514	0.145629	0.445734	Non-sig.
135	11115	ENSG00000163739.5	CXCL1	C-X-C motif chemokine ligand 1 [Source:HGNC Symbol;Acc:HGNC:4602]	83.9659	-0.513047	0.355057	-1.44497	0.148466	0.450455	Non-sig.
136	716	ENSG00000053747.17	LAMA3	laminin subunit alpha 3 [Source:HGNC Symbol;Acc:HGNC:6483]	31.8007	0.91934	0.640703	1.43489	0.151318	0.454791	Non-sig.
137	11485	ENSG00000164949.8	GEM	GTP binding protein overexpressed in skeletal muscle [Source:HGNC Symbol;Acc:HGNC:4234]	36.4087	0.436443	0.305286	1.42962	0.152825	0.457022	Non-sig.
138	1743	ENSG00000087303.18	NID2		8.11452	0.881104	0.626821	1.40567	0.159822	0.466318	Non-sig.
139	6352	ENSG00000130821.17	SLC6A8	solute carrier family 6 member 8 [Source:HGNC Symbol;Acc:HGNC:11055]	210.83	0.13767	0.0990786	1.3895	0.16468	0.473953	Non-sig.
140	935	ENSG00000065534.19	MYLK		204.972	0.446316	0.323115	1.38129	0.167189	0.477273	Non-sig.
141	458	ENSG00000026508.20	CD44		546.009	0.55949	0.410485	1.363	0.172883	0.48494	Non-sig.
142	3659	ENSG00000109321.11	AREG	amphiregulin [Source:HGNC Symbol;Acc:HGNC:651]	39.0226	0.574946	0.438764	1.31038	0.190069	0.506974	Non-sig.
143	7809	ENSG00000139329.5	LUM	lumican [Source:HGNC Symbol;Acc:HGNC:6724]	643.218	0.276188	0.211074	1.30849	0.190707	0.50784	Non-sig.
144	589	ENSG00000042493.16	CAPG	capping actin protein, gelsolin like [Source:HGNC Symbol;Acc:HGNC:1474]	116.046	0.252757	0.194337	1.30061	0.193391	0.510626	Non-sig.
145	6210	ENSG00000130066.17	SAT1	spermidine/spermine N1-acetyltransferase 1 [Source:HGNC Symbol;Acc:HGNC:10540]	2055.11	0.138322	0.106416	1.29982	0.193662	0.510899	Non-sig.
146	7246	ENSG00000136244.12	IL6	interleukin 6 [Source:HGNC Symbol;Acc:HGNC:6018]	8.31593	-0.691496	0.54852	-1.26066	0.207433	0.528616	Non-sig.
147	1749	ENSG00000087494.16	PTHLH	parathyroid hormone like hormone [Source:HGNC Symbol;Acc:HGNC:9607]	11.8927	0.652071	0.526873	1.23762	0.215856	0.538212	Non-sig.
148	14950	ENSG00000180914.11	OXTR	oxytocin receptor [Source:HGNC Symbol;Acc:HGNC:8529]	8.64516	-0.647924	0.533141	-1.2153	0.224253	0.549661	Non-sig.
149	456	ENSG00000026103.22	FAS		23.5061	0.462124	0.415986	1.11091	0.266606	0.596465	Non-sig.
150	7712	ENSG00000138685.17	FGF2	fibroblast growth factor 2 [Source:HGNC Symbol;Acc:HGNC:3676]	432.477	-0.132599	0.125061	-1.06028	0.289017	0.62209	Non-sig.
151	17148	ENSG00000196569.13	LAMA2		3.42024	-0.820517	0.775867	-1.05755	0.290261	0.623107	Non-sig.
152	4477	ENSG00000115738.10	ID2	inhibitor of DNA binding 2 [Source:HGNC Symbol;Acc:HGNC:5361]	962.086	-0.176431	0.186449	-0.946271	0.344011	0.672779	Non-sig.
153	8374	ENSG00000143369.15	ECM1	extracellular matrix protein 1 [Source:HGNC Symbol;Acc:HGNC:3153]	47.2749	0.305715	0.328483	0.930687	0.352015	0.679521	Non-sig.
154	3303	ENSG00000106397.12	PLOD3	procollagen-lysine,2-oxoglutarate 5-dioxygenase 3 [Source:HGNC Symbol;Acc:HGNC:9083]	172.566	0.0993186	0.107986	0.919736	0.357711	0.684393	Non-sig.
155	866	ENSG00000063660.9	GPC1	glypican 1 [Source:HGNC Symbol;Acc:HGNC:4449]	276.369	0.109332	0.119641	0.913834	0.360804	0.686241	Non-sig.
156	2564	ENSG00000101680.15	LAMA1		32.4156	0.499262	0.546885	0.912919	0.361285	0.686319	Non-sig.
157	4675	ENSG00000117152.14	RGS4	regulator of G protein signaling 4 [Source:HGNC Symbol;Acc:HGNC:10000]	143.674	0.2065	0.226958	0.90986	0.362896	0.687807	Non-sig.
158	1100	ENSG00000070087.14	PFN2		593.984	-0.0966065	0.111684	-0.865002	0.387038	0.708005	Non-sig.
159	394	ENSG00000019549.13	SNAI2	snail family transcriptional repressor 2 [Source:HGNC Symbol;Acc:HGNC:11094]	41.9467	0.245097	0.291263	0.841497	0.40007	0.717308	Non-sig.
160	3929	ENSG00000111674.9	ENO2	enolase 2 [Source:HGNC Symbol;Acc:HGNC:3353]	578.716	0.0979986	0.122444	0.800355	0.423505	0.734689	Non-sig.
161	11275	ENSG00000164176.13	EDIL3	EGF like repeats and discoidin domains 3 [Source:HGNC Symbol;Acc:HGNC:3173]	18.1409	-0.357223	0.456784	-0.782038	0.434192	0.744114	Non-sig.
162	11741	ENSG00000166033.13	HTRA1	HtrA serine peptidase 1 [Source:HGNC Symbol;Acc:HGNC:9476]	2030.06	-0.0884706	0.121144	-0.730291	0.465212	0.766086	Non-sig.
163	8213	ENSG00000142227.11	EMP3	epithelial membrane protein 3 [Source:HGNC Symbol;Acc:HGNC:3335]	65.8243	0.118803	0.165842	0.71636	0.473769	0.772547	Non-sig.
164	4817	ENSG00000118503.15	TNFAIP3		30.368	0.182099	0.255437	0.71289	0.475914	0.773645	Non-sig.
165	3073	ENSG00000105290.13	APLP1	amyloid beta precursor like protein 1 [Source:HGNC Symbol;Acc:HGNC:597]	110.133	-0.114251	0.160998	-0.709641	0.477927	0.774841	Non-sig.
166	5599	ENSG00000124875.10	CXCL6	C-X-C motif chemokine ligand 6 [Source:HGNC Symbol;Acc:HGNC:10643]	10.3798	-0.43156	0.634775	-0.679862	0.496592	0.787137	Non-sig.
167	4534	ENSG00000116132.12	PRRX1	paired related homeobox 1 [Source:HGNC Symbol;Acc:HGNC:9142]	1950.47	0.123581	0.192435	0.642195	0.520747	0.802155	Non-sig.
168	14121	ENSG00000176697.20	BDNF	brain derived neurotrophic factor [Source:HGNC Symbol;Acc:HGNC:1033]	30.3066	0.203179	0.33229	0.611452	0.540901	0.813374	Non-sig.
169	9471	ENSG00000151914.21	DST		2349.11	-0.114923	0.188348	-0.610164	0.541753	0.813925	Non-sig.
170	11261	ENSG00000164136.17	IL15	interleukin 15 [Source:HGNC Symbol;Acc:HGNC:5977]	12.8186	-0.253555	0.415849	-0.609727	0.542042	0.813961	Non-sig.
171	12594	ENSG00000169429.11	CXCL8		109.45	-0.156708	0.262487	-0.597013	0.550499	0.81889	Non-sig.
172	1401	ENSG00000077942.19	FBLN1	fibulin 1 [Source:HGNC Symbol;Acc:HGNC:3600]	771.454	-0.092545	0.156268	-0.592218	0.553704	0.820344	Non-sig.
173	4497	ENSG00000115884.11	SDC1	syndecan 1 [Source:HGNC Symbol;Acc:HGNC:10658]	346.906	0.231702	0.39374	0.588465	0.55622	0.820926	Non-sig.
174	15371	ENSG00000182985.18	CADM1	cell adhesion molecule 1 [Source:HGNC Symbol;Acc:HGNC:5951]	1271.31	-0.0780609	0.133984	-0.582612	0.560155	0.823585	Non-sig.
175	9313	ENSG00000150630.4	VEGFC	vascular endothelial growth factor C [Source:HGNC Symbol;Acc:HGNC:12682]	3.42853	-0.473769	0.853396	-0.555158	0.578787	0.833512	Non-sig.
176	5377	ENSG00000123384.14	LRP1	LDL receptor related protein 1 [Source:HGNC Symbol;Acc:HGNC:6692]	696.513	0.0604716	0.11993	0.504222	0.614105	0.851101	Non-sig.
177	3428	ENSG00000107562.16	CXCL12		13.0341	0.292682	0.582851	0.502156	0.615558	0.851652	Non-sig.
178	10797	ENSG00000162692.12	VCAM1	vascular cell adhesion molecule 1 [Source:HGNC Symbol;Acc:HGNC:12663]	388.021	-0.192562	0.390426	-0.493211	0.621863	0.853624	Non-sig.
179	9273	ENSG00000149968.12	MMP3	matrix metallopeptidase 3 [Source:HGNC Symbol;Acc:HGNC:7173]	813.182	0.10873	0.228295	0.476269	0.633883	0.859999	Non-sig.
180	5245	ENSG00000122218.16	COPA		692.095	0.0397327	0.101735	0.39055	0.69613	0.887081	Non-sig.
181	13145	ENSG00000171812.13	COL8A2	collagen type VIII alpha 2 chain [Source:HGNC Symbol;Acc:HGNC:2216]	1929.74	-0.0454406	0.117344	-0.387242	0.698577	0.887908	Non-sig.
182	13230	ENSG00000172164.15	SNTB1	syntrophin beta 1 [Source:HGNC Symbol;Acc:HGNC:11168]	29.6678	-0.1039	0.269746	-0.385176	0.700107	0.888946	Non-sig.
183	4503	ENSG00000115935.18	WIPF1	WAS/WASL interacting protein family member 1 [Source:HGNC Symbol;Acc:HGNC:12736]	82.5754	0.138335	0.365295	0.378695	0.704914	0.891471	Non-sig.
184	11106	ENSG00000163710.9	PCOLCE2	procollagen C-endopeptidase enhancer 2 [Source:HGNC Symbol;Acc:HGNC:8739]	8.27653	0.277874	0.734286	0.378428	0.705113	0.891533	Non-sig.
185	3316	ENSG00000106483.12	SFRP4	secreted frizzled related protein 4 [Source:HGNC Symbol;Acc:HGNC:10778]	39.861	0.139353	0.376797	0.369835	0.711506	0.893779	Non-sig.
186	3369	ENSG00000106823.12	ECM2		15.2395	-0.186802	0.505819	-0.369306	0.711899	0.893779	Non-sig.
187	12384	ENSG00000168542.16	COL3A1	collagen type III alpha 1 chain [Source:HGNC Symbol;Acc:HGNC:2201]	108.097	-0.135719	0.414655	-0.327307	0.743436	0.909101	Non-sig.
188	118	ENSG00000006016.12	CRLF1	cytokine receptor like factor 1 [Source:HGNC Symbol;Acc:HGNC:2364]	260.959	-0.0839477	0.263808	-0.318215	0.750322	0.912305	Non-sig.
189	4267	ENSG00000114251.15	WNT5A	Wnt family member 5A [Source:HGNC Symbol;Acc:HGNC:12784]	221.039	-0.0383539	0.1586	-0.241828	0.808913	0.934494	Non-sig.
190	16219	ENSG00000186340.17	THBS2	thrombospondin 2 [Source:HGNC Symbol;Acc:HGNC:11786]	157.603	0.0642962	0.268462	0.239499	0.810719	0.935301	Non-sig.
191	4220	ENSG00000113721.14	PDGFRB	platelet derived growth factor receptor beta [Source:HGNC Symbol;Acc:HGNC:8804]	494.253	-0.0220617	0.0943909	-0.233727	0.815197	0.936886	Non-sig.
192	11414	ENSG00000164692.18	COL1A2		1422.26	-0.024752	0.130347	-0.189894	0.849392	0.950135	Non-sig.
193	12367	ENSG00000168487.20	BMP1	bone morphogenetic protein 1 [Source:HGNC Symbol;Acc:HGNC:1067]	99.518	0.0347566	0.186564	0.186298	0.852211	0.951446	Non-sig.
194	17951	ENSG00000198934.5	MAGEE1	MAGE family member E1 [Source:HGNC Symbol;Acc:HGNC:24934]	30.0938	-0.0355298	0.259547	-0.136892	0.891117	0.96336	Non-sig.
195	454	ENSG00000026025.16	VIM	vimentin [Source:HGNC Symbol;Acc:HGNC:12692]	4341.41	0.0118737	0.102083	0.116314	0.907403	0.971042	Non-sig.
196	7751	ENSG00000138829.12	FBN2	fibrillin 2 [Source:HGNC Symbol;Acc:HGNC:3604]	13.2632	0.048712	0.4798	0.101526	0.919133	0.975218	Non-sig.
197	3633	ENSG00000109099.16	PMP22	peripheral myelin protein 22 [Source:HGNC Symbol;Acc:HGNC:9118]	519.402	0.00166032	0.10484	0.0158367	0.987365	0.996714	Non-sig.

## Sheet: TNFA_SIGNALING_VIA_NFKB Endo
	V1	gene_id	gene_name	description	baseMean	log2FoldChange	lfcSE	stat	pvalue	padj	sig
1	3299	ENSG00000106366.9	SERPINE1	serpin family E member 1 [Source:HGNC Symbol;Acc:HGNC:8583]	1135.4	2.90334	0.175057	16.5851	8.93365e-62	1.60002e-57	Sig. genes
2	5489	ENSG00000124225.16	PMEPA1	prostate transmembrane protein, androgen induced 1 [Source:HGNC Symbol;Acc:HGNC:14107]	404.657	2.08905	0.181416	11.5153	1.10528e-30	2.82793e-27	Sig. genes
3	2126	ENSG00000099860.9	GADD45B	growth arrest and DNA damage inducible beta [Source:HGNC Symbol;Acc:HGNC:4096]	597.575	1.31625	0.125522	10.4862	9.99809e-26	1.49221e-22	Sig. genes
4	8288	ENSG00000142871.18	CCN1	cellular communication network factor 1 [Source:HGNC Symbol;Acc:HGNC:2654]	901.853	1.78902	0.173476	10.3128	6.1666e-25	8.49567e-22	Sig. genes
5	3748	ENSG00000110092.4	CCND1	cyclin D1 [Source:HGNC Symbol;Acc:HGNC:1582]	908.692	1.23261	0.128799	9.57003	1.0687e-21	7.97521e-19	Sig. genes
6	16110	ENSG00000185950.9	IRS2	insulin receptor substrate 2 [Source:HGNC Symbol;Acc:HGNC:6126]	718.157	0.867165	0.102369	8.47095	2.4339e-17	1.14714e-14	Sig. genes
7	4011	ENSG00000112149.10	CD83	CD83 molecule [Source:HGNC Symbol;Acc:HGNC:1703]	273.297	-1.163	0.160483	-7.24689	4.26466e-13	9.42963e-11	Sig. genes
8	11986	ENSG00000166949.17	SMAD3	SMAD family member 3 [Source:HGNC Symbol;Acc:HGNC:6769]	594.914	-0.627791	0.0866155	-7.24803	4.2289e-13	9.42963e-11	Sig. genes
9	4607	ENSG00000116717.13	GADD45A	growth arrest and DNA damage inducible alpha [Source:HGNC Symbol;Acc:HGNC:4095]	421.248	0.92598	0.136444	6.78654	1.14857e-11	2.07786e-09	Sig. genes
10	807	ENSG00000059804.16	SLC2A3	solute carrier family 2 member 3 [Source:HGNC Symbol;Acc:HGNC:11007]	554.867	1.03159	0.169595	6.08269	1.18181e-09	1.34817e-07	Sig. genes
11	4822	ENSG00000118515.12	SGK1	serum/glucocorticoid regulated kinase 1 [Source:HGNC Symbol;Acc:HGNC:10810]	387.434	-0.778503	0.141315	-5.50897	3.60931e-08	2.83521e-06	Sig. genes
12	10721	ENSG00000162407.9	PLPP3	phospholipid phosphatase 3 [Source:HGNC Symbol;Acc:HGNC:9229]	3320.08	-0.649019	0.123062	-5.27393	1.33535e-07	9.0591e-06	Sig. genes
13	4240	ENSG00000113916.18	BCL6	BCL6 transcription repressor [Source:HGNC Symbol;Acc:HGNC:1001]	797.697	-0.606679	0.115966	-5.23154	1.68102e-07	1.09083e-05	Sig. genes
14	10113	ENSG00000157557.13	ETS2	ETS proto-oncogene 2, transcription factor [Source:HGNC Symbol;Acc:HGNC:3489]	468.524	-0.54719	0.105755	-5.17414	2.28957e-07	1.44388e-05	Sig. genes
15	13009	ENSG00000171223.6	JUNB	JunB proto-oncogene, AP-1 transcription factor subunit [Source:HGNC Symbol;Acc:HGNC:6205]	351.298	0.753893	0.145957	5.16518	2.40207e-07	1.49567e-05	Sig. genes
16	4136	ENSG00000113070.8	HBEGF	heparin binding EGF like growth factor [Source:HGNC Symbol;Acc:HGNC:3059]	221.985	1.04862	0.208603	5.02687	4.98561e-07	2.86193e-05	Sig. genes
17	1684	ENSG00000086062.13	B4GALT1	beta-1,4-galactosyltransferase 1 [Source:HGNC Symbol;Acc:HGNC:924]	1178.6	0.485864	0.0977449	4.97073	6.67004e-07	3.63101e-05	Sig. genes
18	6018	ENSG00000128342.5	LIF	LIF interleukin 6 family cytokine [Source:HGNC Symbol;Acc:HGNC:6596]	33.8547	1.46069	0.302089	4.83529	1.3295e-06	6.54159e-05	Sig. genes
19	13105	ENSG00000171621.14	SPSB1	splA/ryanodine receptor domain and SOCS box containing 1 [Source:HGNC Symbol;Acc:HGNC:30628]	82.8186	0.618698	0.130034	4.75796	1.95557e-06	9.05021e-05	Sig. genes
20	4981	ENSG00000119922.11	IFIT2	interferon induced protein with tetratricopeptide repeats 2 [Source:HGNC Symbol;Acc:HGNC:5409]	330.991	-0.918891	0.197741	-4.64693	3.36905e-06	0.000144447	Sig. genes
21	14018	ENSG00000176170.14	SPHK1	sphingosine kinase 1 [Source:HGNC Symbol;Acc:HGNC:11240]	71.9734	1.04292	0.238222	4.37793	1.19812e-05	0.000448917	Sig. genes
22	10295	ENSG00000159128.15	IFNGR2		286.74	0.5968	0.136753	4.36406	1.27669e-05	0.000469518	Sig. genes
23	580	ENSG00000041982.16	TNC	tenascin C [Source:HGNC Symbol;Acc:HGNC:5318]	31.4456	1.22366	0.294374	4.15683	3.22692e-05	0.0010585	Sig. genes
24	1425	ENSG00000078401.7	EDN1	endothelin 1 [Source:HGNC Symbol;Acc:HGNC:3176]	51.7858	1.21505	0.30025	4.04681	5.19211e-05	0.00158147	Sig. genes
25	1716	ENSG00000087074.8	PPP1R15A	protein phosphatase 1 regulatory subunit 15A [Source:HGNC Symbol;Acc:HGNC:14375]	364.123	0.491237	0.123579	3.9751	7.03503e-05	0.00201596	Sig. genes
26	8483	ENSG00000143878.10	RHOB	ras homolog family member B [Source:HGNC Symbol;Acc:HGNC:668]	67.662	0.689797	0.173748	3.97011	7.18391e-05	0.00205205	Sig. genes
27	7392	ENSG00000136997.21	MYC	MYC proto-oncogene, bHLH transcription factor [Source:HGNC Symbol;Acc:HGNC:7553]	28.1443	1.11059	0.280477	3.95965	7.50593e-05	0.00213045	Sig. genes
28	10773	ENSG00000162616.9	DNAJB4	DnaJ heat shock protein family (Hsp40) member B4 [Source:HGNC Symbol;Acc:HGNC:14886]	137.233	0.62814	0.166471	3.77328	0.000161118	0.00390477	Sig. genes
29	11294	ENSG00000164251.5	F2RL1	F2R like trypsin receptor 1 [Source:HGNC Symbol;Acc:HGNC:3538]	16.0612	1.61164	0.429321	3.75392	0.000174092	0.00414076	Sig. genes
30	13245	ENSG00000172216.6	CEBPB	CCAAT enhancer binding protein beta [Source:HGNC Symbol;Acc:HGNC:1834]	194.536	0.393125	0.105971	3.70975	0.000207464	0.00478208	Sig. genes
31	10916	ENSG00000163110.15	PDLIM5	PDZ and LIM domain 5 [Source:HGNC Symbol;Acc:HGNC:17468]	2248.19	0.287175	0.0784961	3.65846	0.000253737	0.00555341	Sig. genes
32	9837	ENSG00000155090.15	KLF10	Kruppel like factor 10 [Source:HGNC Symbol;Acc:HGNC:11810]	78.1342	0.573066	0.157019	3.64966	0.000262588	0.00568676	Sig. genes
33	13583	ENSG00000173812.11	EIF1	eukaryotic translation initiation factor 1 [Source:HGNC Symbol;Acc:HGNC:3249]	2252.13	0.249696	0.0685757	3.64117	0.000271397	0.00583521	Sig. genes
34	14557	ENSG00000178860.9	MSC	musculin [Source:HGNC Symbol;Acc:HGNC:7321]	15.2868	1.2843	0.368208	3.48796	0.000486713	0.00912778	Sig. genes
35	5322	ENSG00000122877.17	EGR2		5.83029	2.6393	0.763369	3.45744	0.000545335	0.00988558	Sig. genes
36	4724	ENSG00000117525.14	F3	coagulation factor III, tissue factor [Source:HGNC Symbol;Acc:HGNC:3541]	40.1899	1.08341	0.327752	3.30558	0.00094781	0.0152518	Sig. genes
37	5093	ENSG00000120738.8	EGR1	early growth response 1 [Source:HGNC Symbol;Acc:HGNC:3238]	479.622	0.727388	0.222021	3.27622	0.00105208	0.0165433	Sig. genes
38	14677	ENSG00000179431.7	FJX1	four-jointed box kinase 1 [Source:HGNC Symbol;Acc:HGNC:17166]	121.459	-0.477428	0.14814	-3.22281	0.00126939	0.0192017	Sig. genes
39	5287	ENSG00000122641.11	INHBA	inhibin subunit beta A [Source:HGNC Symbol;Acc:HGNC:6066]	304.249	0.786238	0.248132	3.16862	0.00153163	0.0222839	Sig. genes
40	8719	ENSG00000145632.15	PLK2	polo like kinase 2 [Source:HGNC Symbol;Acc:HGNC:19699]	104.303	0.7671	0.246569	3.1111	0.00186393	0.0259184	Sig. genes
41	2405	ENSG00000100906.11	NFKBIA	NFKB inhibitor alpha [Source:HGNC Symbol;Acc:HGNC:7797]	560.841	-0.267911	0.0878252	-3.0505	0.00228458	0.0302182	Sig. genes
42	15764	ENSG00000184588.18	PDE4B	phosphodiesterase 4B [Source:HGNC Symbol;Acc:HGNC:8781]	55.6596	-0.751567	0.246449	-3.04959	0.00229157	0.0302446	Sig. genes
43	10567	ENSG00000161011.20	SQSTM1	sequestosome 1 [Source:HGNC Symbol;Acc:HGNC:11280]	3502.56	0.350325	0.116055	3.01861	0.00253934	0.0325551	Sig. genes
44	13913	ENSG00000175592.9	FOSL1	FOS like 1, AP-1 transcription factor subunit [Source:HGNC Symbol;Acc:HGNC:13718]	83.0549	0.616726	0.20452	3.01548	0.00256571	0.0327759	Sig. genes
45	6890	ENSG00000134352.20	IL6ST	interleukin 6 cytokine family signal transducer [Source:HGNC Symbol;Acc:HGNC:6021]	1366.54	0.327628	0.109465	2.99299	0.00276259	0.0346485	Sig. genes
46	804	ENSG00000059728.11	MXD1	MAX dimerization protein 1 [Source:HGNC Symbol;Acc:HGNC:6761]	62.8945	0.696856	0.240583	2.89653	0.00377315	0.0433742	Sig. genes
47	15630	ENSG00000184014.9	DENND5A	DENN domain containing 5A [Source:HGNC Symbol;Acc:HGNC:19344]	124.102	0.378726	0.132714	2.8537	0.00432129	0.047911	Sig. genes
48	6478	ENSG00000131669.10	NINJ1	ninjurin 1 [Source:HGNC Symbol;Acc:HGNC:7824]	376.842	-0.306271	0.108019	-2.83535	0.00457756	0.0498686	Sig. genes
49	5735	ENSG00000125845.7	BMP2	bone morphogenetic protein 2 [Source:HGNC Symbol;Acc:HGNC:1069]	29.86	0.902461	0.321297	2.80881	0.00497256	0.0530244	Non-sig.
50	14327	ENSG00000177606.8	JUN	Jun proto-oncogene, AP-1 transcription factor subunit [Source:HGNC Symbol;Acc:HGNC:6204]	288.275	0.528634	0.189176	2.79441	0.00519946	0.0548424	Non-sig.
51	1074	ENSG00000069399.15	BCL3	BCL3 transcription coactivator [Source:HGNC Symbol;Acc:HGNC:998]	436.389	-0.384054	0.138429	-2.77437	0.00553089	0.0574251	Non-sig.
52	15714	ENSG00000184371.14	CSF1	colony stimulating factor 1 [Source:HGNC Symbol;Acc:HGNC:2432]	74.2755	0.461446	0.166542	2.77074	0.00559287	0.058035	Non-sig.
53	14285	ENSG00000177426.22	TGIF1	TGFB induced factor homeobox 1 [Source:HGNC Symbol;Acc:HGNC:11776]	76.2525	0.384914	0.14243	2.70248	0.00688237	0.0668819	Non-sig.
54	10310	ENSG00000159200.18	RCAN1	regulator of calcineurin 1 [Source:HGNC Symbol;Acc:HGNC:3040]	650.243	0.416573	0.154158	2.70225	0.00688717	0.0668829	Non-sig.
55	13490	ENSG00000173334.4	TRIB1	tribbles pseudokinase 1 [Source:HGNC Symbol;Acc:HGNC:16891]	57.4831	1.0076	0.373382	2.69858	0.0069635	0.0672325	Non-sig.
56	5460	ENSG00000124145.6	SDC4	syndecan 4 [Source:HGNC Symbol;Acc:HGNC:10661]	1007.63	0.402933	0.15063	2.67498	0.00747338	0.0705207	Non-sig.
57	5577	ENSG00000124762.14	CDKN1A	cyclin dependent kinase inhibitor 1A [Source:HGNC Symbol;Acc:HGNC:1784]	977.553	0.282036	0.107345	2.62736	0.00860493	0.0777962	Non-sig.
58	15868	ENSG00000185022.12	MAFF	MAF bZIP transcription factor F [Source:HGNC Symbol;Acc:HGNC:6780]	197.199	0.365965	0.139645	2.62068	0.00877533	0.0788591	Non-sig.
59	6834	ENSG00000134107.5	BHLHE40	basic helix-loop-helix family member e40 [Source:HGNC Symbol;Acc:HGNC:1046]	106.251	0.538314	0.21905	2.45749	0.0139912	0.109186	Non-sig.
60	8203	ENSG00000142178.9	SIK1	salt inducible kinase 1 [Source:HGNC Symbol;Acc:HGNC:11142]	7.0084	2.54419	1.04044	2.44531	0.0144726	0.112087	Non-sig.
61	16871	ENSG00000189067.14	LITAF	lipopolysaccharide induced TNF factor [Source:HGNC Symbol;Acc:HGNC:16841]	638.502	0.392327	0.161636	2.42723	0.0152147	0.1165	Non-sig.
62	998	ENSG00000067082.15	KLF6	Kruppel like factor 6 [Source:HGNC Symbol;Acc:HGNC:2235]	238.883	0.483461	0.201332	2.40131	0.0163363	0.122499	Non-sig.
63	12412	ENSG00000168685.15	IL7R	interleukin 7 receptor [Source:HGNC Symbol;Acc:HGNC:6024]	11.0238	1.27745	0.543263	2.35143	0.0187013	0.133271	Non-sig.
64	2897	ENSG00000104312.8	RIPK2	receptor interacting serine/threonine kinase 2 [Source:HGNC Symbol;Acc:HGNC:10020]	58.1979	0.55267	0.235265	2.34914	0.0188169	0.133537	Non-sig.
65	2980	ENSG00000104856.14	RELB	RELB proto-oncogene, NF-kB subunit [Source:HGNC Symbol;Acc:HGNC:9956]	71.4537	0.432239	0.18412	2.3476	0.0188948	0.13378	Non-sig.
66	7205	ENSG00000136048.14	DRAM1	DNA damage regulated autophagy modulator 1 [Source:HGNC Symbol;Acc:HGNC:25645]	61.3375	-0.711336	0.303403	-2.34452	0.0190515	0.134441	Non-sig.
67	11502	ENSG00000165029.17	ABCA1	ATP binding cassette subfamily A member 1 [Source:HGNC Symbol;Acc:HGNC:29]	88.1009	0.508822	0.220786	2.30459	0.0211893	0.14375	Non-sig.
68	3610	ENSG00000108932.12	SLC16A6		7.4195	1.19106	0.518523	2.29703	0.021617	0.144939	Non-sig.
69	12552	ENSG00000169242.12	EFNA1	ephrin A1 [Source:HGNC Symbol;Acc:HGNC:3221]	603.894	0.402846	0.175561	2.29462	0.0217547	0.145438	Non-sig.
70	510	ENSG00000034152.19	MAP2K3	mitogen-activated protein kinase kinase 3 [Source:HGNC Symbol;Acc:HGNC:6843]	136.493	-0.271842	0.121175	-2.24338	0.0248724	0.158585	Non-sig.
71	10452	ENSG00000160223.17	ICOSLG	inducible T cell costimulator ligand [Source:HGNC Symbol;Acc:HGNC:17087]	45.4514	0.867874	0.387269	2.24101	0.0250255	0.159208	Non-sig.
72	6774	ENSG00000133639.6	BTG1	BTG anti-proliferation factor 1 [Source:HGNC Symbol;Acc:HGNC:1130]	755.108	0.347099	0.15561	2.23056	0.02571	0.161839	Non-sig.
73	11503	ENSG00000165030.4	NFIL3	nuclear factor, interleukin 3 regulated [Source:HGNC Symbol;Acc:HGNC:7787]	81.1469	0.379729	0.173857	2.18415	0.0289514	0.174998	Non-sig.
74	13428	ENSG00000173039.19	RELA		422.445	0.167148	0.0772856	2.16273	0.0305622	0.181188	Non-sig.
75	5701	ENSG00000125740.14	FOSB	FosB proto-oncogene, AP-1 transcription factor subunit [Source:HGNC Symbol;Acc:HGNC:3797]	19.3322	1.14331	0.544563	2.0995	0.0357732	0.199926	Non-sig.
76	41	ENSG00000003402.20	CFLAR		629.84	-0.22701	0.110223	-2.05955	0.039442	0.212645	Non-sig.
77	15756	ENSG00000184557.4	SOCS3	suppressor of cytokine signaling 3 [Source:HGNC Symbol;Acc:HGNC:19391]	306.967	-0.277933	0.135079	-2.05755	0.0396329	0.213417	Non-sig.
78	11089	ENSG00000163661.4	PTX3	pentraxin 3 [Source:HGNC Symbol;Acc:HGNC:9692]	414.186	0.41682	0.206145	2.02198	0.0431787	0.223527	Non-sig.
79	10827	ENSG00000162772.17	ATF3	activating transcription factor 3 [Source:HGNC Symbol;Acc:HGNC:785]	39.9855	0.642075	0.320377	2.00413	0.0450565	0.229056	Non-sig.
80	298	ENSG00000011422.12	PLAUR	plasminogen activator, urokinase receptor [Source:HGNC Symbol;Acc:HGNC:9053]	196.872	0.313323	0.156377	2.00364	0.0451086	0.229125	Non-sig.
81	5631	ENSG00000125347.15	IRF1	interferon regulatory factor 1 [Source:HGNC Symbol;Acc:HGNC:6116]	218.112	-0.278802	0.139863	-1.99339	0.0462192	0.233021	Non-sig.
82	11087	ENSG00000163659.13	TIPARP	TCDD inducible poly(ADP-ribose) polymerase [Source:HGNC Symbol;Acc:HGNC:23696]	293.677	0.248462	0.128139	1.939	0.0525012	0.252369	Non-sig.
83	7453	ENSG00000137331.12	IER3	immediate early response 3 [Source:HGNC Symbol;Acc:HGNC:5392]	9708.73	-0.174045	0.089883	-1.93635	0.0528248	0.25302	Non-sig.
84	6602	ENSG00000132510.11	KDM6B	lysine demethylase 6B [Source:HGNC Symbol;Acc:HGNC:29012]	71.3571	0.276643	0.147604	1.87422	0.0609003	0.276442	Non-sig.
85	2516	ENSG00000101384.12	JAG1	jagged canonical Notch ligand 1 [Source:HGNC Symbol;Acc:HGNC:6188]	106.077	0.507643	0.275321	1.84382	0.0652089	0.287179	Non-sig.
86	4101	ENSG00000112715.25	VEGFA		413.696	0.371446	0.203218	1.82782	0.067577	0.293392	Non-sig.
87	10344	ENSG00000159388.6	BTG2	BTG anti-proliferation factor 2 [Source:HGNC Symbol;Acc:HGNC:1131]	74.0083	-0.308371	0.1742	-1.77021	0.0766917	0.314097	Non-sig.
88	54259	ENSG00000277443.3	MARCKS	myristoylated alanine rich protein kinase C substrate [Source:HGNC Symbol;Acc:HGNC:6759]	326.377	0.438939	0.251565	1.74483	0.081014	0.324382	Non-sig.
89	1371	ENSG00000077150.20	NFKB2	nuclear factor kappa B subunit 2 [Source:HGNC Symbol;Acc:HGNC:7795]	64.4823	-0.346402	0.19908	-1.74001	0.0818567	0.326588	Non-sig.
90	2726	ENSG00000102908.22	NFAT5	nuclear factor of activated T cells 5 [Source:HGNC Symbol;Acc:HGNC:7774]	458.924	-0.167425	0.0980429	-1.70767	0.0876971	0.33992	Non-sig.
91	5930	ENSG00000127528.6	KLF2	Kruppel like factor 2 [Source:HGNC Symbol;Acc:HGNC:6347]	15.3362	0.842806	0.493647	1.7073	0.0877656	0.33992	Non-sig.
92	3735	ENSG00000110047.18	EHD1	EH domain containing 1 [Source:HGNC Symbol;Acc:HGNC:3242]	253.862	-0.196326	0.116063	-1.69155	0.0907314	0.346064	Non-sig.
93	5010	ENSG00000120129.6	DUSP1	dual specificity phosphatase 1 [Source:HGNC Symbol;Acc:HGNC:3064]	107.596	0.387098	0.231774	1.67015	0.0948888	0.352825	Non-sig.
94	12610	ENSG00000169508.7	GPR183	G protein-coupled receptor 183 [Source:HGNC Symbol;Acc:HGNC:3128]	6.24578	1.23655	0.74296	1.66435	0.096042	0.355443	Non-sig.
95	12846	ENSG00000170525.21	PFKFB3	6-phosphofructo-2-kinase/fructose-2,6-biphosphatase 3 [Source:HGNC Symbol;Acc:HGNC:8874]	354.122	0.213789	0.130497	1.63826	0.101367	0.366615	Non-sig.
96	5316	ENSG00000122861.16	PLAU	plasminogen activator, urokinase [Source:HGNC Symbol;Acc:HGNC:9052]	42.2983	0.641565	0.395677	1.62144	0.104924	0.374863	Non-sig.
97	8381	ENSG00000143384.14	MCL1	MCL1 apoptosis regulator, BCL2 family member [Source:HGNC Symbol;Acc:HGNC:6943]	764.131	0.109814	0.0687814	1.59657	0.110362	0.38545	Non-sig.
98	3759	ENSG00000110218.9	PANX1	pannexin 1 [Source:HGNC Symbol;Acc:HGNC:8599]	36.6181	-0.264741	0.174947	-1.51326	0.130213	0.420697	Non-sig.
99	5373	ENSG00000123358.20	NR4A1	nuclear receptor subfamily 4 group A member 1 [Source:HGNC Symbol;Acc:HGNC:7980]	21.617	-1.09164	0.725348	-1.505	0.132325	0.42419	Non-sig.
100	5412	ENSG00000123610.5	TNFAIP6	TNF alpha induced protein 6 [Source:HGNC Symbol;Acc:HGNC:11898]	23.1047	0.556055	0.371854	1.49536	0.134821	0.428129	Non-sig.
101	12455	ENSG00000168884.15	TNIP2	TNFAIP3 interacting protein 2 [Source:HGNC Symbol;Acc:HGNC:19118]	207.256	0.204475	0.136866	1.49398	0.135182	0.428643	Non-sig.
102	3400	ENSG00000107201.11	DDX58	DExD/H-box helicase 58 [Source:HGNC Symbol;Acc:HGNC:19102]	82.6613	-0.369262	0.247321	-1.49305	0.135425	0.428905	Non-sig.
103	17242	ENSG00000196878.15	LAMB3	laminin subunit beta 3 [Source:HGNC Symbol;Acc:HGNC:6490]	104.207	0.63547	0.434799	1.46152	0.143871	0.442586	Non-sig.
104	3202	ENSG00000105835.13	NAMPT	nicotinamide phosphoribosyltransferase [Source:HGNC Symbol;Acc:HGNC:30092]	1110.47	0.24123	0.166076	1.45253	0.146354	0.446922	Non-sig.
105	11115	ENSG00000163739.5	CXCL1	C-X-C motif chemokine ligand 1 [Source:HGNC Symbol;Acc:HGNC:4602]	83.9659	-0.513047	0.355057	-1.44497	0.148466	0.450455	Non-sig.
106	7802	ENSG00000139289.14	PHLDA1	pleckstrin homology like domain family A member 1 [Source:HGNC Symbol;Acc:HGNC:8933]	317.134	-0.155837	0.10836	-1.43814	0.150394	0.453309	Non-sig.
107	11485	ENSG00000164949.8	GEM	GTP binding protein overexpressed in skeletal muscle [Source:HGNC Symbol;Acc:HGNC:4234]	36.4087	0.436443	0.305286	1.42962	0.152825	0.457022	Non-sig.
108	5688	ENSG00000125657.5	TNFSF9	TNF superfamily member 9 [Source:HGNC Symbol;Acc:HGNC:11939]	5.49705	0.846989	0.59713	1.41843	0.156065	0.461977	Non-sig.
109	5418	ENSG00000123689.6	G0S2	G0/G1 switch 2 [Source:HGNC Symbol;Acc:HGNC:30229]	97.2722	0.438683	0.31168	1.40748	0.159285	0.465611	Non-sig.
110	12794	ENSG00000170345.10	FOS	Fos proto-oncogene, AP-1 transcription factor subunit [Source:HGNC Symbol;Acc:HGNC:3796]	80.9171	0.416331	0.304897	1.36548	0.172102	0.484112	Non-sig.
111	458	ENSG00000026508.20	CD44		546.009	0.55949	0.410485	1.363	0.172883	0.48494	Non-sig.
112	4525	ENSG00000116044.16	NFE2L2	nuclear factor, erythroid 2 like 2 [Source:HGNC Symbol;Acc:HGNC:7782]	1080.52	0.131456	0.0969738	1.35558	0.175232	0.487688	Non-sig.
113	3659	ENSG00000109321.11	AREG	amphiregulin [Source:HGNC Symbol;Acc:HGNC:651]	39.0226	0.574946	0.438764	1.31038	0.190069	0.506974	Non-sig.
114	6210	ENSG00000130066.17	SAT1	spermidine/spermine N1-acetyltransferase 1 [Source:HGNC Symbol;Acc:HGNC:10540]	2055.11	0.138322	0.106416	1.29982	0.193662	0.510899	Non-sig.
115	15072	ENSG00000181649.8	PHLDA2	pleckstrin homology like domain family A member 2 [Source:HGNC Symbol;Acc:HGNC:12385]	99.3067	0.426477	0.331331	1.28716	0.198038	0.517338	Non-sig.
116	7951	ENSG00000140379.9	BCL2A1	BCL2 related protein A1 [Source:HGNC Symbol;Acc:HGNC:991]	6.871	0.936859	0.734425	1.27564	0.202084	0.522024	Non-sig.
117	430	ENSG00000023445.16	BIRC3	baculoviral IAP repeat containing 3 [Source:HGNC Symbol;Acc:HGNC:591]	50.3182	-0.394346	0.309593	-1.27376	0.20275	0.522797	Non-sig.
118	7341	ENSG00000136826.15	KLF4	Kruppel like factor 4 [Source:HGNC Symbol;Acc:HGNC:6348]	24.1493	0.530221	0.419893	1.26275	0.206678	0.527797	Non-sig.
119	7246	ENSG00000136244.12	IL6	interleukin 6 [Source:HGNC Symbol;Acc:HGNC:6018]	8.31593	-0.691496	0.54852	-1.26066	0.207433	0.528616	Non-sig.
120	10474	ENSG00000160326.14	SLC2A6	solute carrier family 2 member 6 [Source:HGNC Symbol;Acc:HGNC:11011]	79.6071	-0.182313	0.146659	-1.24311	0.213828	0.535543	Non-sig.
121	7442	ENSG00000137267.7	TUBB2A	tubulin beta 2A class IIa [Source:HGNC Symbol;Acc:HGNC:12412]	89.5183	0.371698	0.305077	1.21838	0.223081	0.548138	Non-sig.
122	3575	ENSG00000108691.9	CCL2		353.761	-0.250518	0.207994	-1.20445	0.228416	0.554411	Non-sig.
123	4272	ENSG00000114315.4	HES1	hes family bHLH transcription factor 1 [Source:HGNC Symbol;Acc:HGNC:5192]	350.104	0.209082	0.177532	1.17771	0.238911	0.566707	Non-sig.
124	11088	ENSG00000163660.12	CCNL1	cyclin L1 [Source:HGNC Symbol;Acc:HGNC:20569]	383.29	-0.126811	0.110545	-1.14715	0.25132	0.579298	Non-sig.
125	4394	ENSG00000115267.9	IFIH1	interferon induced with helicase C domain 1 [Source:HGNC Symbol;Acc:HGNC:18873]	61.2536	-0.222171	0.203533	-1.09157	0.275022	0.606692	Non-sig.
126	8568	ENSG00000144476.6	ACKR3	atypical chemokine receptor 3 [Source:HGNC Symbol;Acc:HGNC:23692]	80.9034	0.214155	0.197427	1.08473	0.278042	0.609216	Non-sig.
127	3658	ENSG00000109320.13	NFKB1	nuclear factor kappa B subunit 1 [Source:HGNC Symbol;Acc:HGNC:7794]	211.065	0.118077	0.111022	1.06355	0.287534	0.62045	Non-sig.
128	1241	ENSG00000073756.13	PTGS2	prostaglandin-endoperoxide synthase 2 [Source:HGNC Symbol;Acc:HGNC:9605]	1847.54	0.148664	0.143975	1.03257	0.301804	0.633834	Non-sig.
129	7470	ENSG00000137462.9	TLR2	toll like receptor 2 [Source:HGNC Symbol;Acc:HGNC:11848]	77.7707	-0.208366	0.202614	-1.02839	0.303768	0.635792	Non-sig.
130	10548	ENSG00000160888.7	IER2	immediate early response 2 [Source:HGNC Symbol;Acc:HGNC:28871]	732.944	0.131255	0.127631	1.02839	0.303765	0.635792	Non-sig.
131	5980	ENSG00000128016.7	ZFP36	ZFP36 ring finger protein [Source:HGNC Symbol;Acc:HGNC:12862]	14.1456	-0.292101	0.285181	-1.02427	0.305709	0.638011	Non-sig.
132	8825	ENSG00000146278.11	PNRC1	proline rich nuclear receptor coactivator 1 [Source:HGNC Symbol;Acc:HGNC:17278]	377.075	-0.106237	0.105868	-1.00348	0.315629	0.646639	Non-sig.
133	10168	ENSG00000158050.5	DUSP2	dual specificity phosphatase 2 [Source:HGNC Symbol;Acc:HGNC:3068]	6.62831	0.610343	0.61449	0.993252	0.320587	0.650988	Non-sig.
134	9785	ENSG00000154640.15	BTG3	BTG anti-proliferation factor 3 [Source:HGNC Symbol;Acc:HGNC:1132]	187.16	0.0879705	0.0900997	0.976368	0.328882	0.658044	Non-sig.
135	14611	ENSG00000179094.16	PER1	period circadian regulator 1 [Source:HGNC Symbol;Acc:HGNC:8845]	215.695	0.149366	0.155923	0.95795	0.338088	0.66672	Non-sig.
136	4477	ENSG00000115738.10	ID2	inhibitor of DNA binding 2 [Source:HGNC Symbol;Acc:HGNC:5361]	962.086	-0.176431	0.186449	-0.946271	0.344011	0.672779	Non-sig.
137	5107	ENSG00000120875.9	DUSP4	dual specificity phosphatase 4 [Source:HGNC Symbol;Acc:HGNC:3070]	40.754	0.214628	0.228895	0.937671	0.348414	0.677393	Non-sig.
138	15919	ENSG00000185215.11	TNFAIP2	TNF alpha induced protein 2 [Source:HGNC Symbol;Acc:HGNC:11895]	132.414	0.198418	0.216257	0.917509	0.358876	0.685085	Non-sig.
139	24081	ENSG00000221869.5	CEBPD	CCAAT enhancer binding protein delta [Source:HGNC Symbol;Acc:HGNC:1835]	1135.97	-0.0863644	0.0985336	-0.876497	0.38076	0.703518	Non-sig.
140	4001	ENSG00000112096.19	SOD2	superoxide dismutase 2 [Source:HGNC Symbol;Acc:HGNC:11180]	2533.92	0.150839	0.176235	0.855899	0.392054	0.712875	Non-sig.
141	17482	ENSG00000197632.9	SERPINB2	serpin family B member 2 [Source:HGNC Symbol;Acc:HGNC:8584]	21.9393	0.445973	0.534984	0.833619	0.404496	0.720828	Non-sig.
142	8816	ENSG00000146232.17	NFKBIE	NFKB inhibitor epsilon [Source:HGNC Symbol;Acc:HGNC:7799]	48.2398	-0.147988	0.178912	-0.827159	0.408147	0.723682	Non-sig.
143	2707	ENSG00000102804.15	TSC22D1	TSC22 domain family member 1 [Source:HGNC Symbol;Acc:HGNC:16826]	1909.77	-0.110032	0.140032	-0.785762	0.432007	0.742054	Non-sig.
144	9334	ENSG00000150782.12	IL18	interleukin 18 [Source:HGNC Symbol;Acc:HGNC:5986]	20.3002	0.382709	0.488293	0.78377	0.433175	0.743336	Non-sig.
145	3480	ENSG00000107968.10	MAP3K8	mitogen-activated protein kinase kinase kinase 8 [Source:HGNC Symbol;Acc:HGNC:6860]	44.7199	-0.188236	0.251044	-0.749811	0.453369	0.757478	Non-sig.
146	4874	ENSG00000119138.5	KLF9	Kruppel like factor 9 [Source:HGNC Symbol;Acc:HGNC:1123]	448.046	-0.10079	0.135763	-0.7424	0.457845	0.761374	Non-sig.
147	4817	ENSG00000118503.15	TNFAIP3		30.368	0.182099	0.255437	0.71289	0.475914	0.773645	Non-sig.
148	4576	ENSG00000116514.17	RNF19B	ring finger protein 19B [Source:HGNC Symbol;Acc:HGNC:26886]	13.2664	0.191775	0.274639	0.69828	0.485002	0.779381	Non-sig.
149	6523	ENSG00000131979.20	GCH1	GTP cyclohydrolase 1 [Source:HGNC Symbol;Acc:HGNC:4193]	8.80769	-0.285614	0.412863	-0.691788	0.48907	0.781864	Non-sig.
150	5599	ENSG00000124875.10	CXCL6	C-X-C motif chemokine ligand 6 [Source:HGNC Symbol;Acc:HGNC:10643]	10.3798	-0.43156	0.634775	-0.679862	0.496592	0.787137	Non-sig.
151	6449	ENSG00000131459.13	GFPT2	glutamine-fructose-6-phosphate transaminase 2 [Source:HGNC Symbol;Acc:HGNC:4242]	28.5686	0.170785	0.262866	0.649701	0.515885	0.798989	Non-sig.
152	6568	ENSG00000132334.17	PTPRE	protein tyrosine phosphatase receptor type E [Source:HGNC Symbol;Acc:HGNC:9669]	73.2214	0.158261	0.253774	0.623629	0.532872	0.809839	Non-sig.
153	13893	ENSG00000175505.11	CLCF1	cardiotrophin like cytokine factor 1 [Source:HGNC Symbol;Acc:HGNC:17412]	10.1047	0.277437	0.447595	0.619838	0.535364	0.811168	Non-sig.
154	8742	ENSG00000145779.8	TNFAIP8	TNF alpha induced protein 8 [Source:HGNC Symbol;Acc:HGNC:17260]	35.5952	-0.186007	0.302197	-0.615516	0.538214	0.812529	Non-sig.
155	4909	ENSG00000119508.18	NR4A3	nuclear receptor subfamily 4 group A member 3 [Source:HGNC Symbol;Acc:HGNC:7982]	4.36835	-0.475466	0.775139	-0.613395	0.539615	0.812908	Non-sig.
156	8765	ENSG00000145901.16	TNIP1	TNFAIP3 interacting protein 1 [Source:HGNC Symbol;Acc:HGNC:16903]	221.645	0.107707	0.178141	0.604616	0.545434	0.815821	Non-sig.
157	12345	ENSG00000168394.12	TAP1	transporter 1, ATP binding cassette subfamily B member [Source:HGNC Symbol;Acc:HGNC:43]	156.52	0.061509	0.109592	0.561256	0.574623	0.831275	Non-sig.
158	6216	ENSG00000130164.14	LDLR	low density lipoprotein receptor [Source:HGNC Symbol;Acc:HGNC:6547]	408.732	0.0784621	0.154923	0.506458	0.612535	0.850097	Non-sig.
159	4508	ENSG00000115956.10	PLEK	pleckstrin [Source:HGNC Symbol;Acc:HGNC:9070]	6.16874	-0.387049	0.764476	-0.506293	0.612651	0.850136	Non-sig.
160	1141	ENSG00000070961.16	ATP2B1	ATPase plasma membrane Ca2+ transporting 1 [Source:HGNC Symbol;Acc:HGNC:814]	610.41	-0.0583305	0.120399	-0.484475	0.628049	0.857278	Non-sig.
161	1311	ENSG00000075426.12	FOSL2	FOS like 2, AP-1 transcription factor subunit [Source:HGNC Symbol;Acc:HGNC:3798]	537.335	0.0490595	0.105804	0.463682	0.642875	0.864416	Non-sig.
162	11840	ENSG00000166401.15	SERPINB8	serpin family B member 8 [Source:HGNC Symbol;Acc:HGNC:8952]	69.036	-0.0938565	0.204628	-0.458668	0.646473	0.866186	Non-sig.
163	6909	ENSG00000134470.21	IL15RA	interleukin 15 receptor subunit alpha [Source:HGNC Symbol;Acc:HGNC:5978]	7.47076	0.179343	0.493678	0.363279	0.716397	0.895535	Non-sig.
164	13081	ENSG00000171522.6	PTGER4	prostaglandin E receptor 4 [Source:HGNC Symbol;Acc:HGNC:9596]	10.5899	0.148614	0.431909	0.344086	0.730782	0.903712	Non-sig.
165	1873	ENSG00000090339.9	ICAM1	intercellular adhesion molecule 1 [Source:HGNC Symbol;Acc:HGNC:5344]	190.57	-0.0340223	0.102124	-0.333146	0.739024	0.906694	Non-sig.
166	764	ENSG00000056558.11	TRAF1	TNF receptor associated factor 1 [Source:HGNC Symbol;Acc:HGNC:12031]	18.8796	0.0869803	0.292823	0.297041	0.766435	0.918922	Non-sig.
167	17107	ENSG00000196449.4	YRDC	yrdC N6-threonylcarbamoyltransferase domain containing [Source:HGNC Symbol;Acc:HGNC:28905]	37.7973	-0.0542515	0.215287	-0.251996	0.801044	0.931967	Non-sig.
168	661	ENSG00000049249.9	TNFRSF9	TNF receptor superfamily member 9 [Source:HGNC Symbol;Acc:HGNC:11924]	3.42311	0.211783	0.843789	0.250991	0.801821	0.93234	Non-sig.
169	4501	ENSG00000115919.15	KYNU	kynureninase [Source:HGNC Symbol;Acc:HGNC:6469]	18.0004	0.148685	0.670305	0.221818	0.824456	0.940959	Non-sig.
170	15767	ENSG00000184602.6	SNN	stannin [Source:HGNC Symbol;Acc:HGNC:11149]	103.678	-0.0340238	0.156429	-0.217504	0.827816	0.94252	Non-sig.
171	5698	ENSG00000125733.18	TRIP10	thyroid hormone receptor interactor 10 [Source:HGNC Symbol;Acc:HGNC:12304]	256.334	0.0193312	0.0915841	0.211076	0.832828	0.943988	Non-sig.
172	5834	ENSG00000126561.18	STAT5A	signal transducer and activator of transcription 5A [Source:HGNC Symbol;Acc:HGNC:11366]	61.3553	-0.0344315	0.163829	-0.210168	0.833537	0.944111	Non-sig.
173	9636	ENSG00000153234.15	NR4A2	nuclear receptor subfamily 4 group A member 2 [Source:HGNC Symbol;Acc:HGNC:7981]	34.1569	-0.0609686	0.351646	-0.17338	0.862352	0.955029	Non-sig.
174	10832	ENSG00000162783.11	IER5	immediate early response 5 [Source:HGNC Symbol;Acc:HGNC:5393]	177.048	0.0186441	0.116035	0.160677	0.872348	0.957791	Non-sig.
175	17074	ENSG00000196371.4	FUT4	fucosyltransferase 4 [Source:HGNC Symbol;Acc:HGNC:4015]	8.40521	-0.066048	0.435349	-0.151713	0.879413	0.959965	Non-sig.
176	20122	ENSG00000205189.12	ZBTB10	zinc finger and BTB domain containing 10 [Source:HGNC Symbol;Acc:HGNC:30953]	203.668	0.0162951	0.120479	0.135252	0.892413	0.963912	Non-sig.
177	10216	ENSG00000158470.5	B4GALT5	beta-1,4-galactosyltransferase 5 [Source:HGNC Symbol;Acc:HGNC:928]	556.378	0.0132073	0.113394	0.116473	0.907278	0.97098	Non-sig.
178	1521	ENSG00000081041.9	CXCL2	C-X-C motif chemokine ligand 2 [Source:HGNC Symbol;Acc:HGNC:4603]	10.0587	0.0480929	0.454763	0.105754	0.915778	0.974027	Non-sig.
179	11156	ENSG00000163874.11	ZC3H12A	zinc finger CCCH-type containing 12A [Source:HGNC Symbol;Acc:HGNC:26259]	35.3314	-0.0247657	0.281085	-0.0881074	0.929791	0.978768	Non-sig.
180	7300	ENSG00000136560.14	TANK	TRAF family member associated NFKB activator [Source:HGNC Symbol;Acc:HGNC:11562]	84.2824	-0.0208363	0.240492	-0.0866402	0.930957	0.978885	Non-sig.
181	3770	ENSG00000110330.9	BIRC2		349.705	-0.0146368	0.183403	-0.0798066	0.936391	0.980413	Non-sig.
182	11110	ENSG00000163734.4	CXCL3	C-X-C motif chemokine ligand 3 [Source:HGNC Symbol;Acc:HGNC:4604]	15.4293	0.0268225	0.464737	0.0577155	0.953975	0.987266	Non-sig.
183	51223	ENSG00000271503.6	CCL5	C-C motif chemokine ligand 5 [Source:HGNC Symbol;Acc:HGNC:10632]	11.4036	-0.0150609	0.458096	-0.0328771	0.973773	0.993514	Non-sig.
184	7624	ENSG00000138166.6	DUSP5	dual specificity phosphatase 5 [Source:HGNC Symbol;Acc:HGNC:3071]	83.4859	0.00610052	0.192158	0.0317474	0.974673	0.993676	Non-sig.
185	5198	ENSG00000121797.10	CCRL2	C-C motif chemokine receptor like 2 [Source:HGNC Symbol;Acc:HGNC:1612]	4.07295	-0.0263483	1.07083	-0.0246054	0.98037	0.994785	Non-sig.
186	10863	ENSG00000162924.15	REL	REL proto-oncogene, NF-kB subunit [Source:HGNC Symbol;Acc:HGNC:9954]	174.306	-0.00160174	0.125689	-0.0127437	0.989832	0.997462	Non-sig.

## Sheet: HYPOXIA Endo
	V1	gene_id	gene_name	description	baseMean	log2FoldChange	lfcSE	stat	pvalue	padj	sig
1	3299	ENSG00000106366.9	SERPINE1	serpin family E member 1 [Source:HGNC Symbol;Acc:HGNC:8583]	1135.4	2.90334	0.175057	16.5851	8.93365e-62	1.60002e-57	Sig. genes
2	8868	ENSG00000146674.16	IGFBP3	insulin like growth factor binding protein 3 [Source:HGNC Symbol;Acc:HGNC:5472]	1383.81	2.49669	0.170106	14.6773	9.01215e-49	8.07038e-45	Sig. genes
3	12192	ENSG00000167772.12	ANGPTL4	angiopoietin like 4 [Source:HGNC Symbol;Acc:HGNC:16039]	236.25	2.84313	0.246632	11.5278	9.55551e-31	2.82793e-27	Sig. genes
4	4825	ENSG00000118523.6	CCN2	cellular communication network factor 2 [Source:HGNC Symbol;Acc:HGNC:2500]	10148.5	2.12098	0.189101	11.2161	3.39932e-29	6.08819e-26	Sig. genes
5	8288	ENSG00000142871.18	CCN1	cellular communication network factor 1 [Source:HGNC Symbol;Acc:HGNC:2654]	901.853	1.78902	0.173476	10.3128	6.1666e-25	8.49567e-22	Sig. genes
6	2249	ENSG00000100292.18	HMOX1	heme oxygenase 1 [Source:HGNC Symbol;Acc:HGNC:5013]	849.525	3.44089	0.348217	9.88143	5.01113e-23	4.72365e-20	Sig. genes
7	15254	ENSG00000182492.16	BGN	biglycan [Source:HGNC Symbol;Acc:HGNC:1044]	1956.74	1.38041	0.140414	9.83095	8.28317e-23	7.06436e-20	Sig. genes
8	1356	ENSG00000076716.9	GPC4	glypican 4 [Source:HGNC Symbol;Acc:HGNC:4452]	1041.16	0.863727	0.0902212	9.57343	1.03416e-21	7.97521e-19	Sig. genes
9	2274	ENSG00000100345.22	MYH9		1802.34	0.472472	0.0504063	9.37329	7.03084e-21	4.34215e-18	Sig. genes
10	16110	ENSG00000185950.9	IRS2	insulin receptor substrate 2 [Source:HGNC Symbol;Acc:HGNC:6126]	718.157	0.867165	0.102369	8.47095	2.4339e-17	1.14714e-14	Sig. genes
11	6380	ENSG00000131016.17	AKAP12	A-kinase anchoring protein 12 [Source:HGNC Symbol;Acc:HGNC:370]	1351.23	1.03971	0.129086	8.05439	7.98771e-16	2.98042e-13	Sig. genes
12	1200	ENSG00000072682.20	P4HA2	prolyl 4-hydroxylase subunit alpha 2 [Source:HGNC Symbol;Acc:HGNC:8547]	471.608	0.723701	0.0918391	7.8801	3.27119e-15	1.12667e-12	Sig. genes
13	9027	ENSG00000147872.10	PLIN2	perilipin 2 [Source:HGNC Symbol;Acc:HGNC:248]	844.807	1.38062	0.188073	7.34087	2.12214e-13	5.06767e-11	Sig. genes
14	15187	ENSG00000182197.13	EXT1	exostosin glycosyltransferase 1 [Source:HGNC Symbol;Acc:HGNC:3512]	294.153	0.78053	0.107662	7.24981	4.17349e-13	9.42963e-11	Sig. genes
15	1122	ENSG00000070614.15	NDST1	N-deacetylase and N-sulfotransferase 1 [Source:HGNC Symbol;Acc:HGNC:7680]	510.733	0.725724	0.107938	6.72351	1.77395e-11	3.01626e-09	Sig. genes
16	15043	ENSG00000181458.10	TMEM45A	transmembrane protein 45A [Source:HGNC Symbol;Acc:HGNC:25480]	303.853	1.14544	0.172332	6.6467	2.99747e-11	4.79327e-09	Sig. genes
17	807	ENSG00000059804.16	SLC2A3	solute carrier family 2 member 3 [Source:HGNC Symbol;Acc:HGNC:11007]	554.867	1.03159	0.169595	6.08269	1.18181e-09	1.34817e-07	Sig. genes
18	9022	ENSG00000147852.17	VLDLR	very low density lipoprotein receptor [Source:HGNC Symbol;Acc:HGNC:12698]	106.064	0.877202	0.148307	5.91477	3.32349e-09	3.39308e-07	Sig. genes
19	1277	ENSG00000074800.16	ENO1	enolase 1 [Source:HGNC Symbol;Acc:HGNC:3350]	18591.4	-0.426622	0.0737789	-5.78243	7.36279e-09	6.83251e-07	Sig. genes
20	4224	ENSG00000113739.11	STC2	stanniocalcin 2 [Source:HGNC Symbol;Acc:HGNC:11374]	2785.51	1.47072	0.255524	5.7557	8.62821e-09	7.84423e-07	Sig. genes
21	4138	ENSG00000113083.15	LOX	lysyl oxidase [Source:HGNC Symbol;Acc:HGNC:6664]	85.0351	1.84551	0.327344	5.63783	1.7221e-08	1.46175e-06	Sig. genes
22	6300	ENSG00000130635.16	COL5A1	collagen type V alpha 1 chain [Source:HGNC Symbol;Acc:HGNC:2209]	218.567	1.24307	0.242396	5.12827	2.92419e-07	1.77533e-05	Sig. genes
23	6177	ENSG00000129757.15	CDKN1C	cyclin dependent kinase inhibitor 1C [Source:HGNC Symbol;Acc:HGNC:1786]	892.084	-0.68884	0.139957	-4.92179	8.5755e-07	4.55749e-05	Sig. genes
24	2259	ENSG00000100311.17	PDGFB	platelet derived growth factor subunit B [Source:HGNC Symbol;Acc:HGNC:8800]	246.4	0.674215	0.143934	4.68421	2.8104e-06	0.000123856	Sig. genes
25	12299	ENSG00000168209.6	DDIT4	DNA damage inducible transcript 4 [Source:HGNC Symbol;Acc:HGNC:24944]	465.834	0.765202	0.168579	4.53914	5.64848e-06	0.000230969	Sig. genes
26	3636	ENSG00000109107.14	ALDOC	aldolase, fructose-bisphosphate C [Source:HGNC Symbol;Acc:HGNC:418]	256.721	-0.446023	0.101069	-4.41304	1.01929e-05	0.000395141	Sig. genes
27	6987	ENSG00000134954.14	ETS1	ETS proto-oncogene 1, transcription factor [Source:HGNC Symbol;Acc:HGNC:3488]	134.189	0.634716	0.15211	4.17274	3.0096e-05	0.000992669	Sig. genes
28	5615	ENSG00000125148.7	MT2A	metallothionein 2A [Source:HGNC Symbol;Acc:HGNC:7406]	13074.7	0.978738	0.239983	4.07836	4.53538e-05	0.00142506	Sig. genes
29	265	ENSG00000010404.18	IDS	iduronate 2-sulfatase [Source:HGNC Symbol;Acc:HGNC:5389]	1175.1	0.315437	0.0776349	4.06308	4.84301e-05	0.00150066	Sig. genes
30	4293	ENSG00000114480.13	GBE1	1,4-alpha-glucan branching enzyme 1 [Source:HGNC Symbol;Acc:HGNC:4180]	383.759	0.554783	0.138163	4.01541	5.93415e-05	0.00176546	Sig. genes
31	16996	ENSG00000196154.12	S100A4	S100 calcium binding protein A4 [Source:HGNC Symbol;Acc:HGNC:10494]	2279.17	-1.07203	0.26765	-4.00532	6.19323e-05	0.0018334	Sig. genes
32	1716	ENSG00000087074.8	PPP1R15A	protein phosphatase 1 regulatory subunit 15A [Source:HGNC Symbol;Acc:HGNC:14375]	364.123	0.491237	0.123579	3.9751	7.03503e-05	0.00201596	Sig. genes
33	1263	ENSG00000074410.14	CA12	carbonic anhydrase 12 [Source:HGNC Symbol;Acc:HGNC:1371]	11680	-0.463797	0.123129	-3.76675	0.000165386	0.00395985	Sig. genes
34	7426	ENSG00000137193.14	PIM1	Pim-1 proto-oncogene, serine/threonine kinase [Source:HGNC Symbol;Acc:HGNC:8986]	110.188	0.493273	0.13467	3.66282	0.000249458	0.00549044	Sig. genes
35	7413	ENSG00000137106.18	GRHPR	glyoxylate and hydroxypyruvate reductase [Source:HGNC Symbol;Acc:HGNC:4570]	387.595	-0.469884	0.128731	-3.65012	0.000262121	0.00568475	Sig. genes
36	5324	ENSG00000122884.13	P4HA1	prolyl 4-hydroxylase subunit alpha 1 [Source:HGNC Symbol;Acc:HGNC:8546]	670.991	0.324029	0.0896948	3.61257	0.000303177	0.00636772	Sig. genes
37	8952	ENSG00000147257.15	GPC3		26.808	1.10341	0.311189	3.54578	0.00039146	0.00774702	Sig. genes
38	2961	ENSG00000104765.16	BNIP3L	BCL2 interacting protein 3 like [Source:HGNC Symbol;Acc:HGNC:1085]	1197.67	0.391579	0.110716	3.53681	0.000404994	0.00792727	Sig. genes
39	8389	ENSG00000143416.21	SELENBP1	selenium binding protein 1 [Source:HGNC Symbol;Acc:HGNC:10719]	41.7845	-0.754176	0.223599	-3.37289	0.00074383	0.0127361	Sig. genes
40	12598	ENSG00000169439.12	SDC2	syndecan 2 [Source:HGNC Symbol;Acc:HGNC:10659]	374.212	-0.323973	0.0967487	-3.3486	0.000812215	0.0135951	Sig. genes
41	3055	ENSG00000105220.17	GPI	glucose-6-phosphate isomerase [Source:HGNC Symbol;Acc:HGNC:4458]	1296.54	-0.187626	0.0563489	-3.32971	0.00086936	0.014324	Sig. genes
42	4724	ENSG00000117525.14	F3	coagulation factor III, tissue factor [Source:HGNC Symbol;Acc:HGNC:3541]	40.1899	1.08341	0.327752	3.30558	0.00094781	0.0152518	Sig. genes
43	3229	ENSG00000105974.13	CAV1	caveolin 1 [Source:HGNC Symbol;Acc:HGNC:1527]	983.086	-0.318127	0.09811	-3.24255	0.00118465	0.0181653	Sig. genes
44	4561	ENSG00000116285.13	ERRFI1	ERBB receptor feedback inhibitor 1 [Source:HGNC Symbol;Acc:HGNC:18185]	212.949	0.415857	0.137169	3.0317	0.00243178	0.0315603	Sig. genes
45	5087	ENSG00000120708.17	TGFBI	transforming growth factor beta induced [Source:HGNC Symbol;Acc:HGNC:11771]	4317.82	0.60512	0.199697	3.03018	0.00244404	0.0316735	Sig. genes
46	13835	ENSG00000175197.13	DDIT3	DNA damage inducible transcript 3 [Source:HGNC Symbol;Acc:HGNC:2726]	427.029	0.409449	0.137123	2.98599	0.00282661	0.0350414	Sig. genes
47	10729	ENSG00000162433.15	AK4	adenylate kinase 4 [Source:HGNC Symbol;Acc:HGNC:363]	1287.64	-0.226398	0.0780683	-2.9	0.00373167	0.0430633	Sig. genes
48	4793	ENSG00000118263.15	KLF7	Kruppel like factor 7 [Source:HGNC Symbol;Acc:HGNC:6350]	75.7632	0.643421	0.222724	2.88887	0.00386624	0.0441172	Sig. genes
49	4248	ENSG00000114023.15	FAM162A		541.285	-0.245534	0.0854229	-2.87433	0.00404883	0.0454637	Sig. genes
50	13832	ENSG00000175183.10	CSRP2	cysteine and glycine rich protein 2 [Source:HGNC Symbol;Acc:HGNC:2470]	102.104	0.70597	0.247264	2.85513	0.00430198	0.0477376	Sig. genes
51	14327	ENSG00000177606.8	JUN	Jun proto-oncogene, AP-1 transcription factor subunit [Source:HGNC Symbol;Acc:HGNC:6204]	288.275	0.528634	0.189176	2.79441	0.00519946	0.0548424	Non-sig.
52	14298	ENSG00000177469.13	CAVIN1	caveolae associated protein 1 [Source:HGNC Symbol;Acc:HGNC:9688]	3309.16	0.234046	0.0847974	2.76006	0.00577912	0.0593827	Non-sig.
53	12654	ENSG00000169715.15	MT1E	metallothionein 1E [Source:HGNC Symbol;Acc:HGNC:7397]	611.298	0.572899	0.210529	2.72124	0.00650382	0.064498	Non-sig.
54	2599	ENSG00000101955.15	SRPX	sushi repeat containing protein X-linked [Source:HGNC Symbol;Acc:HGNC:11309]	88.2672	0.485934	0.178729	2.71883	0.00655135	0.0648616	Non-sig.
55	5460	ENSG00000124145.6	SDC4	syndecan 4 [Source:HGNC Symbol;Acc:HGNC:10661]	1007.63	0.402933	0.15063	2.67498	0.00747338	0.0705207	Non-sig.
56	3876	ENSG00000111276.12	CDKN1B	cyclin dependent kinase inhibitor 1B [Source:HGNC Symbol;Acc:HGNC:1785]	175.962	-0.269225	0.100969	-2.66641	0.00766658	0.0715894	Non-sig.
57	5577	ENSG00000124762.14	CDKN1A	cyclin dependent kinase inhibitor 1A [Source:HGNC Symbol;Acc:HGNC:1784]	977.553	0.282036	0.107345	2.62736	0.00860493	0.0777962	Non-sig.
58	15868	ENSG00000185022.12	MAFF	MAF bZIP transcription factor F [Source:HGNC Symbol;Acc:HGNC:6780]	197.199	0.365965	0.139645	2.62068	0.00877533	0.0788591	Non-sig.
59	35756	ENSG00000240972.2	MIF	macrophage migration inhibitory factor [Source:HGNC Symbol;Acc:HGNC:7097]	2963.07	-0.212937	0.0825768	-2.57865	0.00991874	0.0859016	Non-sig.
60	1028	ENSG00000067992.16	PDK3		195.303	-0.277267	0.110158	-2.51699	0.0118361	0.0971957	Non-sig.
61	10346	ENSG00000159399.10	HK2	hexokinase 2 [Source:HGNC Symbol;Acc:HGNC:4923]	133.849	0.467027	0.187357	2.49271	0.0126772	0.102007	Non-sig.
62	669	ENSG00000049759.20	NEDD4L	NEDD4 like E3 ubiquitin protein ligase [Source:HGNC Symbol;Acc:HGNC:7728]	297.525	-0.524698	0.212686	-2.46701	0.0136247	0.107214	Non-sig.
63	4846	ENSG00000118804.9	STBD1	starch binding domain 1 [Source:HGNC Symbol;Acc:HGNC:24854]	20.2155	0.583545	0.23691	2.46314	0.0137724	0.108139	Non-sig.
64	6834	ENSG00000134107.5	BHLHE40	basic helix-loop-helix family member e40 [Source:HGNC Symbol;Acc:HGNC:1046]	106.251	0.538314	0.21905	2.45749	0.0139912	0.109186	Non-sig.
65	11530	ENSG00000165140.12	FBP1	fructose-bisphosphatase 1 [Source:HGNC Symbol;Acc:HGNC:3606]	25.8054	-0.660135	0.274542	-2.4045	0.0161946	0.121816	Non-sig.
66	998	ENSG00000067082.15	KLF6	Kruppel like factor 6 [Source:HGNC Symbol;Acc:HGNC:2235]	238.883	0.483461	0.201332	2.40131	0.0163363	0.122499	Non-sig.
67	2214	ENSG00000100196.11	KDELR3	KDEL endoplasmic reticulum protein retention receptor 3 [Source:HGNC Symbol;Acc:HGNC:6306]	234.908	-0.399346	0.167357	-2.38618	0.0170242	0.125374	Non-sig.
68	3915	ENSG00000111640.15	GAPDH	glyceraldehyde-3-phosphate dehydrogenase [Source:HGNC Symbol;Acc:HGNC:4141]	9942.6	-0.24155	0.10213	-2.36513	0.0180238	0.130164	Non-sig.
69	12669	ENSG00000169764.16	UGP2	UDP-glucose pyrophosphorylase 2 [Source:HGNC Symbol;Acc:HGNC:12527]	474.763	0.270076	0.117326	2.30194	0.0213386	0.144217	Non-sig.
70	10746	ENSG00000162512.16	SDC3	syndecan 3 [Source:HGNC Symbol;Acc:HGNC:10660]	92.6087	0.476843	0.207491	2.29813	0.0215543	0.144842	Non-sig.
71	12552	ENSG00000169242.12	EFNA1	ephrin A1 [Source:HGNC Symbol;Acc:HGNC:3221]	603.894	0.402846	0.175561	2.29462	0.0217547	0.145438	Non-sig.
72	8818	ENSG00000146242.9	TPBG	trophoblast glycoprotein [Source:HGNC Symbol;Acc:HGNC:12004]	81.7124	0.415311	0.18233	2.27779	0.0227388	0.14936	Non-sig.
73	15307	ENSG00000182718.18	ANXA2	annexin A2 [Source:HGNC Symbol;Acc:HGNC:537]	3180.27	0.297115	0.130409	2.27834	0.0227065	0.14936	Non-sig.
74	6774	ENSG00000133639.6	BTG1	BTG anti-proliferation factor 1 [Source:HGNC Symbol;Acc:HGNC:1130]	755.108	0.347099	0.15561	2.23056	0.02571	0.161839	Non-sig.
75	9431	ENSG00000151640.13	DPYSL4	dihydropyrimidinase like 4 [Source:HGNC Symbol;Acc:HGNC:3016]	50.7439	0.43458	0.197626	2.199	0.0278776	0.171106	Non-sig.
76	11503	ENSG00000165030.4	NFIL3	nuclear factor, interleukin 3 regulated [Source:HGNC Symbol;Acc:HGNC:7787]	81.1469	0.379729	0.173857	2.18415	0.0289514	0.174998	Non-sig.
77	6794	ENSG00000133805.15	AMPD3		131.814	0.716299	0.328262	2.1821	0.0291022	0.175536	Non-sig.
78	22430	ENSG00000213614.11	HEXA	hexosaminidase subunit alpha [Source:HGNC Symbol;Acc:HGNC:4878]	445.699	0.32694	0.149853	2.18174	0.0291286	0.175536	Non-sig.
79	608	ENSG00000044574.9	HSPA5	heat shock protein family A (Hsp70) member 5 [Source:HGNC Symbol;Acc:HGNC:5238]	5064.11	0.246407	0.116415	2.11664	0.0342908	0.194474	Non-sig.
80	302	ENSG00000011465.18	DCN	decorin [Source:HGNC Symbol;Acc:HGNC:2705]	3378.1	0.392345	0.187539	2.09207	0.0364323	0.202201	Non-sig.
81	2179	ENSG00000100075.10	SLC25A1	solute carrier family 25 member 1 [Source:HGNC Symbol;Acc:HGNC:10979]	296.495	-0.171698	0.0835151	-2.05589	0.0397929	0.213812	Non-sig.
82	10827	ENSG00000162772.17	ATF3	activating transcription factor 3 [Source:HGNC Symbol;Acc:HGNC:785]	39.9855	0.642075	0.320377	2.00413	0.0450565	0.229056	Non-sig.
83	298	ENSG00000011422.12	PLAUR	plasminogen activator, urokinase receptor [Source:HGNC Symbol;Acc:HGNC:9053]	196.872	0.313323	0.156377	2.00364	0.0451086	0.229125	Non-sig.
84	3709	ENSG00000109819.9	PPARGC1A	PPARG coactivator 1 alpha [Source:HGNC Symbol;Acc:HGNC:9237]	51.1069	-0.697017	0.351441	-1.98331	0.0473328	0.236862	Non-sig.
85	3538	ENSG00000108479.13	GALK1	galactokinase 1 [Source:HGNC Symbol;Acc:HGNC:4118]	49.5604	-0.426504	0.218978	-1.9477	0.0514506	0.249656	Non-sig.
86	4699	ENSG00000117394.24	SLC2A1	solute carrier family 2 member 1 [Source:HGNC Symbol;Acc:HGNC:11005]	4241.02	-0.238588	0.122945	-1.94061	0.0523053	0.251977	Non-sig.
87	11087	ENSG00000163659.13	TIPARP	TCDD inducible poly(ADP-ribose) polymerase [Source:HGNC Symbol;Acc:HGNC:23696]	293.677	0.248462	0.128139	1.939	0.0525012	0.252369	Non-sig.
88	7453	ENSG00000137331.12	IER3	immediate early response 3 [Source:HGNC Symbol;Acc:HGNC:5392]	9708.73	-0.174045	0.089883	-1.93635	0.0528248	0.25302	Non-sig.
89	9995	ENSG00000156515.24	HK1	hexokinase 1 [Source:HGNC Symbol;Acc:HGNC:4922]	642.503	0.13688	0.0747079	1.83221	0.0669203	0.292275	Non-sig.
90	4101	ENSG00000112715.25	VEGFA		413.696	0.371446	0.203218	1.82782	0.067577	0.293392	Non-sig.
91	1116	ENSG00000070495.15	JMJD6	jumonji domain containing 6, arginine demethylase and lysine hydroxylase [Source:HGNC Symbol;Acc:HGNC:19355]	82.0032	0.385606	0.212689	1.813	0.0698317	0.298209	Non-sig.
92	9925	ENSG00000155980.13	KIF5A	kinesin family member 5A [Source:HGNC Symbol;Acc:HGNC:6323]	55.4639	-0.583965	0.322617	-1.81009	0.0702824	0.299176	Non-sig.
93	7039	ENSG00000135269.18	TES	testin LIM domain protein [Source:HGNC Symbol;Acc:HGNC:14620]	1383.32	-0.223863	0.125206	-1.78795	0.0737835	0.30696	Non-sig.
94	4984	ENSG00000119938.9	PPP1R3C	protein phosphatase 1 regulatory subunit 3C [Source:HGNC Symbol;Acc:HGNC:9293]	122.401	0.39226	0.22651	1.73176	0.0833169	0.329623	Non-sig.
95	4201	ENSG00000113580.15	NR3C1	nuclear receptor subfamily 3 group C member 1 [Source:HGNC Symbol;Acc:HGNC:7978]	448.173	0.142305	0.0822261	1.73066	0.0835127	0.330252	Non-sig.
96	12300	ENSG00000168214.21	RBPJ		933.839	0.125176	0.0726833	1.72222	0.0850299	0.334406	Non-sig.
97	4471	ENSG00000115677.18	HDLBP	high density lipoprotein binding protein [Source:HGNC Symbol;Acc:HGNC:4857]	1656.99	-0.158903	0.0931529	-1.70584	0.0880387	0.340629	Non-sig.
98	5010	ENSG00000120129.6	DUSP1	dual specificity phosphatase 1 [Source:HGNC Symbol;Acc:HGNC:3064]	107.596	0.387098	0.231774	1.67015	0.0948888	0.352825	Non-sig.
99	2921	ENSG00000104419.17	NDRG1	N-myc downstream regulated 1 [Source:HGNC Symbol;Acc:HGNC:7679]	731.795	0.558024	0.335744	1.66205	0.0965024	0.356289	Non-sig.
100	12846	ENSG00000170525.21	PFKFB3	6-phosphofructo-2-kinase/fructose-2,6-biphosphatase 3 [Source:HGNC Symbol;Acc:HGNC:8874]	354.122	0.213789	0.130497	1.63826	0.101367	0.366615	Non-sig.
101	15097	ENSG00000181788.4	SIAH2	siah E3 ubiquitin protein ligase 2 [Source:HGNC Symbol;Acc:HGNC:10858]	88.185	-0.245244	0.149746	-1.63774	0.101477	0.366792	Non-sig.
102	17962	ENSG00000198959.12	TGM2	transglutaminase 2 [Source:HGNC Symbol;Acc:HGNC:11778]	134.77	0.602548	0.368769	1.63394	0.102271	0.368767	Non-sig.
103	7730	ENSG00000138764.15	CCNG2	cyclin G2 [Source:HGNC Symbol;Acc:HGNC:1593]	63.8208	0.32518	0.200739	1.61992	0.10525	0.375397	Non-sig.
104	6009	ENSG00000128294.16	TPST2	tyrosylprotein sulfotransferase 2 [Source:HGNC Symbol;Acc:HGNC:12021]	36.0578	0.519698	0.322491	1.61151	0.107068	0.378746	Non-sig.
105	3037	ENSG00000105135.16	ILVBL	ilvB acetolactate synthase like [Source:HGNC Symbol;Acc:HGNC:6041]	189.551	0.193662	0.121018	1.60027	0.109539	0.383923	Non-sig.
106	995	ENSG00000067057.18	PFKP	phosphofructokinase, platelet [Source:HGNC Symbol;Acc:HGNC:8878]	981.614	0.292134	0.187579	1.55739	0.119378	0.402057	Non-sig.
107	1081	ENSG00000069667.16	RORA	RAR related orphan receptor A [Source:HGNC Symbol;Acc:HGNC:10258]	916.12	-0.189944	0.125459	-1.514	0.130027	0.420434	Non-sig.
108	10301	ENSG00000159167.12	STC1	stanniocalcin 1 [Source:HGNC Symbol;Acc:HGNC:11373]	2047.17	-0.292057	0.193016	-1.51312	0.130248	0.420697	Non-sig.
109	4944	ENSG00000119699.8	TGFB3	transforming growth factor beta 3 [Source:HGNC Symbol;Acc:HGNC:11769]	172.761	0.267767	0.186432	1.43627	0.150925	0.454269	Non-sig.
110	6887	ENSG00000134333.14	LDHA	lactate dehydrogenase A [Source:HGNC Symbol;Acc:HGNC:6535]	3164.47	-0.124951	0.0880151	-1.41966	0.155708	0.461509	Non-sig.
111	9148	ENSG00000148926.10	ADM	adrenomedullin [Source:HGNC Symbol;Acc:HGNC:259]	1215	-0.170614	0.120893	-1.41128	0.158162	0.465059	Non-sig.
112	444	ENSG00000025039.15	RRAGD	Ras related GTP binding D [Source:HGNC Symbol;Acc:HGNC:19903]	488.964	0.143175	0.102177	1.40124	0.161143	0.468161	Non-sig.
113	13802	ENSG00000175040.6	CHST2	carbohydrate sulfotransferase 2 [Source:HGNC Symbol;Acc:HGNC:1970]	13.5388	0.727607	0.522961	1.39132	0.164128	0.473236	Non-sig.
114	5819	ENSG00000126432.14	PRDX5	peroxiredoxin 5 [Source:HGNC Symbol;Acc:HGNC:9355]	828.148	-0.099005	0.0721382	-1.37244	0.169928	0.481171	Non-sig.
115	12794	ENSG00000170345.10	FOS	Fos proto-oncogene, AP-1 transcription factor subunit [Source:HGNC Symbol;Acc:HGNC:3796]	80.9171	0.416331	0.304897	1.36548	0.172102	0.484112	Non-sig.
116	9739	ENSG00000154229.12	PRKCA	protein kinase C alpha [Source:HGNC Symbol;Acc:HGNC:9393]	104.893	-0.506307	0.374878	-1.35059	0.176826	0.489711	Non-sig.
117	4330	ENSG00000114796.16	KLHL24	kelch like family member 24 [Source:HGNC Symbol;Acc:HGNC:25947]	238.242	0.291979	0.217019	1.34541	0.178493	0.492238	Non-sig.
118	6756	ENSG00000133424.22	LARGE1	LARGE xylosyl- and glucuronyltransferase 1 [Source:HGNC Symbol;Acc:HGNC:6511]	68.4424	-0.258367	0.192085	-1.34507	0.178603	0.492373	Non-sig.
119	1534	ENSG00000081277.13	PKP1	plakophilin 1 [Source:HGNC Symbol;Acc:HGNC:9023]	194.957	0.803693	0.601694	1.33572	0.181642	0.495168	Non-sig.
120	12568	ENSG00000169299.14	PGM2	phosphoglucomutase 2 [Source:HGNC Symbol;Acc:HGNC:8906]	65.2828	-0.245854	0.191874	-1.28133	0.200077	0.52001	Non-sig.
121	7246	ENSG00000136244.12	IL6	interleukin 6 [Source:HGNC Symbol;Acc:HGNC:6018]	8.31593	-0.691496	0.54852	-1.26066	0.207433	0.528616	Non-sig.
122	623	ENSG00000047457.14	CP	ceruloplasmin [Source:HGNC Symbol;Acc:HGNC:2295]	443.89	0.48851	0.439757	1.11086	0.266628	0.596465	Non-sig.
123	2636	ENSG00000102144.15	PGK1	phosphoglycerate kinase 1 [Source:HGNC Symbol;Acc:HGNC:8896]	1018.54	-0.0851685	0.0769266	-1.10714	0.268233	0.598202	Non-sig.
124	1062	ENSG00000068976.14	PYGM	glycogen phosphorylase, muscle associated [Source:HGNC Symbol;Acc:HGNC:9726]	3.99614	-1.01186	0.919201	-1.10081	0.27098	0.60132	Non-sig.
125	4836	ENSG00000118689.15	FOXO3	forkhead box O3 [Source:HGNC Symbol;Acc:HGNC:3821]	619.898	0.0906167	0.0826176	1.09682	0.27272	0.603572	Non-sig.
126	8568	ENSG00000144476.6	ACKR3	atypical chemokine receptor 3 [Source:HGNC Symbol;Acc:HGNC:23692]	80.9034	0.214155	0.197427	1.08473	0.278042	0.609216	Non-sig.
127	7741	ENSG00000138794.10	CASP6	caspase 6 [Source:HGNC Symbol;Acc:HGNC:1507]	67.6207	0.200147	0.188814	1.06003	0.289133	0.62209	Non-sig.
128	5980	ENSG00000128016.7	ZFP36	ZFP36 ring finger protein [Source:HGNC Symbol;Acc:HGNC:12862]	14.1456	-0.292101	0.285181	-1.02427	0.305709	0.638011	Non-sig.
129	8825	ENSG00000146278.11	PNRC1	proline rich nuclear receptor coactivator 1 [Source:HGNC Symbol;Acc:HGNC:17278]	377.075	-0.106237	0.105868	-1.00348	0.315629	0.646639	Non-sig.
130	5439	ENSG00000123999.5	INHA	inhibin subunit alpha [Source:HGNC Symbol;Acc:HGNC:6065]	4.71665	-0.512879	0.528575	-0.970307	0.331894	0.661645	Non-sig.
131	11028	ENSG00000163516.14	ANKZF1	ankyrin repeat and zinc finger peptidyl tRNA hydrolase 1 [Source:HGNC Symbol;Acc:HGNC:25527]	178.914	-0.137694	0.144214	-0.954795	0.339682	0.66847	Non-sig.
132	1475	ENSG00000079739.17	PGM1	phosphoglucomutase 1 [Source:HGNC Symbol;Acc:HGNC:8905]	213.624	-0.125561	0.131817	-0.952535	0.340825	0.669398	Non-sig.
133	3926	ENSG00000111669.15	TPI1	triosephosphate isomerase 1 [Source:HGNC Symbol;Acc:HGNC:12009]	1728.67	-0.0676584	0.073396	-0.921827	0.356619	0.683612	Non-sig.
134	866	ENSG00000063660.9	GPC1	glypican 1 [Source:HGNC Symbol;Acc:HGNC:4449]	276.369	0.109332	0.119641	0.913834	0.360804	0.686241	Non-sig.
135	9351	ENSG00000151014.6	NOCT	nocturnin [Source:HGNC Symbol;Acc:HGNC:14254]	3.74037	0.689619	0.76304	0.903778	0.366113	0.690977	Non-sig.
136	13236	ENSG00000172183.16	ISG20	interferon stimulated exonuclease gene 20 [Source:HGNC Symbol;Acc:HGNC:6130]	37.1369	0.190745	0.216127	0.88256	0.377474	0.701303	Non-sig.
137	13465	ENSG00000173221.14	GLRX	glutaredoxin [Source:HGNC Symbol;Acc:HGNC:4330]	130.065	0.111846	0.127339	0.87833	0.379765	0.703007	Non-sig.
138	8865	ENSG00000146648.20	EGFR	epidermal growth factor receptor [Source:HGNC Symbol;Acc:HGNC:3236]	541.336	0.101257	0.118275	0.85612	0.391932	0.712856	Non-sig.
139	3543	ENSG00000108515.18	ENO3	enolase 3 [Source:HGNC Symbol;Acc:HGNC:3354]	46.7287	-0.19504	0.227853	-0.855989	0.392004	0.712875	Non-sig.
140	3929	ENSG00000111674.9	ENO2	enolase 2 [Source:HGNC Symbol;Acc:HGNC:3353]	578.716	0.0979986	0.122444	0.800355	0.423505	0.734689	Non-sig.
141	8475	ENSG00000143847.15	PPFIA4		11.3065	0.344711	0.444327	0.775804	0.437865	0.747228	Non-sig.
142	4925	ENSG00000119630.14	PGF	placental growth factor [Source:HGNC Symbol;Acc:HGNC:8893]	27.7124	0.292739	0.387363	0.755721	0.449816	0.755066	Non-sig.
143	8181	ENSG00000141959.17	PFKL	phosphofructokinase, liver type [Source:HGNC Symbol;Acc:HGNC:8876]	298.378	0.075784	0.102724	0.737742	0.460671	0.763381	Non-sig.
144	8734	ENSG00000145730.21	PAM	peptidylglycine alpha-amidating monooxygenase [Source:HGNC Symbol;Acc:HGNC:8596]	225.479	-0.0827422	0.115511	-0.716311	0.473799	0.772547	Non-sig.
145	4817	ENSG00000118503.15	TNFAIP3		30.368	0.182099	0.255437	0.71289	0.475914	0.773645	Non-sig.
146	12943	ENSG00000170955.10	CAVIN3	caveolae associated protein 3 [Source:HGNC Symbol;Acc:HGNC:9400]	121.709	0.106742	0.155085	0.688279	0.491277	0.783297	Non-sig.
147	8251	ENSG00000142583.18	SLC2A5	solute carrier family 2 member 5 [Source:HGNC Symbol;Acc:HGNC:11010]	5.92188	0.443379	0.655443	0.676458	0.49875	0.788473	Non-sig.
148	7511	ENSG00000137700.18	SLC37A4	solute carrier family 37 member 4 [Source:HGNC Symbol;Acc:HGNC:4061]	107.376	-0.0892712	0.140164	-0.636907	0.524185	0.804213	Non-sig.
149	5219	ENSG00000121966.7	CXCR4		54.723	0.209666	0.352101	0.595471	0.551529	0.819537	Non-sig.
150	11873	ENSG00000166507.19	NDST2	N-deacetylase and N-sulfotransferase 2 [Source:HGNC Symbol;Acc:HGNC:7681]	11.6662	0.204157	0.368683	0.553748	0.579751	0.833736	Non-sig.
151	11242	ENSG00000164105.4	SAP30	Sin3A associated protein 30 [Source:HGNC Symbol;Acc:HGNC:10532]	142.667	-0.0744808	0.137366	-0.542205	0.587677	0.838643	Non-sig.
152	1759	ENSG00000088002.12	SULT2B1	sulfotransferase family 2B member 1 [Source:HGNC Symbol;Acc:HGNC:11459]	3.36582	0.47361	0.894267	0.529607	0.596385	0.842124	Non-sig.
153	26	ENSG00000002587.10	HS3ST1	heparan sulfate-glucosamine 3-sulfotransferase 1 [Source:HGNC Symbol;Acc:HGNC:5194]	21.1868	-0.238034	0.47899	-0.49695	0.619224	0.852594	Non-sig.
154	3969	ENSG00000111846.19	GCNT2		7.96037	0.318436	0.666838	0.477531	0.632984	0.859887	Non-sig.
155	5514	ENSG00000124357.13	NAGK	N-acetylglucosamine kinase [Source:HGNC Symbol;Acc:HGNC:17174]	187.189	0.0554402	0.116721	0.474979	0.634802	0.860704	Non-sig.
156	2015	ENSG00000095015.6	MAP3K1	mitogen-activated protein kinase kinase kinase 1 [Source:HGNC Symbol;Acc:HGNC:6848]	103.91	0.076131	0.161738	0.470707	0.63785	0.862026	Non-sig.
157	5499	ENSG00000124253.11	PCK1	phosphoenolpyruvate carboxykinase 1 [Source:HGNC Symbol;Acc:HGNC:8724]	17.656	-0.279431	0.595899	-0.468923	0.639125	0.862602	Non-sig.
158	1311	ENSG00000075426.12	FOSL2	FOS like 2, AP-1 transcription factor subunit [Source:HGNC Symbol;Acc:HGNC:3798]	537.335	0.0490595	0.105804	0.463682	0.642875	0.864416	Non-sig.
159	16848	ENSG00000188994.13	ZNF292	zinc finger protein 292 [Source:HGNC Symbol;Acc:HGNC:18410]	792.694	0.0983585	0.217031	0.4532	0.650405	0.867727	Non-sig.
160	5318	ENSG00000122863.6	CHST3	carbohydrate sulfotransferase 3 [Source:HGNC Symbol;Acc:HGNC:1971]	53.8481	-0.0671673	0.156139	-0.430175	0.667068	0.875479	Non-sig.
161	11437	ENSG00000164776.10	PHKG1		26.7265	-0.102026	0.24113	-0.423116	0.672211	0.87747	Non-sig.
162	8431	ENSG00000143590.14	EFNA3	ephrin A3 [Source:HGNC Symbol;Acc:HGNC:3223]	41.9307	-0.0788848	0.22516	-0.35035	0.726076	0.901277	Non-sig.
163	11555	ENSG00000165240.21	ATP7A		75.1942	0.0678685	0.193851	0.350106	0.726259	0.901277	Non-sig.
164	877	ENSG00000064205.11	CCN5	cellular communication network factor 5 [Source:HGNC Symbol;Acc:HGNC:12770]	19.5528	0.123723	0.357428	0.346147	0.729232	0.902826	Non-sig.
165	9514	ENSG00000152256.14	PDK1	pyruvate dehydrogenase kinase 1 [Source:HGNC Symbol;Acc:HGNC:8809]	153.27	0.0976797	0.288721	0.338319	0.735123	0.904925	Non-sig.
166	2967	ENSG00000104812.15	GYS1	glycogen synthase 1 [Source:HGNC Symbol;Acc:HGNC:4706]	48.7772	-0.0611105	0.198101	-0.308482	0.757716	0.914899	Non-sig.
167	1348	ENSG00000076554.16	TPD52	tumor protein D52 [Source:HGNC Symbol;Acc:HGNC:12005]	190.251	-0.0477448	0.168342	-0.283619	0.776703	0.923198	Non-sig.
168	11354	ENSG00000164442.10	CITED2	Cbp/p300 interacting transactivator with Glu/Asp rich carboxy-terminal domain 2 [Source:HGNC Symbol;Acc:HGNC:1987]	111.27	-0.036706	0.132376	-0.277286	0.78156	0.925044	Non-sig.
169	6440	ENSG00000131389.18	SLC6A6	solute carrier family 6 member 6 [Source:HGNC Symbol;Acc:HGNC:11052]	356.546	0.0346715	0.137162	0.252777	0.800441	0.931921	Non-sig.
170	4987	ENSG00000119950.21	MXI1	MAX interactor 1, dimerization protein [Source:HGNC Symbol;Acc:HGNC:7534]	442.968	-0.0261068	0.104022	-0.250975	0.801833	0.93234	Non-sig.
171	3343	ENSG00000106633.18	GCK	glucokinase [Source:HGNC Symbol;Acc:HGNC:4195]	7.59899	-0.0832609	0.390935	-0.212979	0.831343	0.943461	Non-sig.
172	17572	ENSG00000197930.13	ERO1A	endoplasmic reticulum oxidoreductase 1 alpha [Source:HGNC Symbol;Acc:HGNC:13280]	351.932	0.0295207	0.143832	0.205244	0.837381	0.945201	Non-sig.
173	13988	ENSG00000176022.7	B3GALT6	beta-1,3-galactosyltransferase 6 [Source:HGNC Symbol;Acc:HGNC:17978]	116.534	0.0229978	0.119593	0.1923	0.847507	0.949212	Non-sig.
174	6833	ENSG00000134086.8	VHL		418.218	0.0128394	0.0694447	0.184887	0.853318	0.951713	Non-sig.
175	6956	ENSG00000134769.23	DTNA	dystrobrevin alpha [Source:HGNC Symbol;Acc:HGNC:3057]	67.5738	-0.0579913	0.368971	-0.15717	0.875111	0.958725	Non-sig.
176	13137	ENSG00000171791.14	BCL2	BCL2 apoptosis regulator [Source:HGNC Symbol;Acc:HGNC:990]	50.5335	0.0656765	0.426796	0.153883	0.877702	0.959277	Non-sig.
177	3486	ENSG00000108039.18	XPNPEP1	X-prolyl aminopeptidase 1 [Source:HGNC Symbol;Acc:HGNC:12822]	223.199	0.0178838	0.124657	0.143464	0.885924	0.962271	Non-sig.
178	13020	ENSG00000171298.13	GAA	alpha glucosidase [Source:HGNC Symbol;Acc:HGNC:4065]	146.273	0.0152034	0.145081	0.104793	0.91654	0.974229	Non-sig.
179	1218	ENSG00000073060.17	SCARB1	scavenger receptor class B member 1 [Source:HGNC Symbol;Acc:HGNC:1664]	135.74	-0.00966315	0.119298	-0.0810002	0.935442	0.980197	Non-sig.
180	3621	ENSG00000109046.15	WSB1	WD repeat and SOCS box containing 1 [Source:HGNC Symbol;Acc:HGNC:19221]	1012.07	0.00507887	0.0872529	0.0582087	0.953582	0.987186	Non-sig.
181	9266	ENSG00000149925.22	ALDOA	aldolase, fructose-bisphosphate A [Source:HGNC Symbol;Acc:HGNC:414]	1864.84	-0.00300235	0.0713092	-0.0421033	0.966416	0.991568	Non-sig.
182	1455	ENSG00000079257.8	LXN	latexin [Source:HGNC Symbol;Acc:HGNC:13347]	59.2392	0.000941481	0.224026	0.00420255	0.996647	0.999157	Non-sig.
183	4450	ENSG00000115548.17	KDM3A	lysine demethylase 3A [Source:HGNC Symbol;Acc:HGNC:20815]	146.2	-0.000110702	0.181804	-0.000608907	0.999514	0.99995	Non-sig.

## Sheet: APICAL_JUNCTION Endo
	V1	gene_id	gene_name	description	baseMean	log2FoldChange	lfcSE	stat	pvalue	padj	sig
1	1177	ENSG00000072110.16	ACTN1	actinin alpha 1 [Source:HGNC Symbol;Acc:HGNC:163]	3610.32	0.872783	0.0915917	9.52905	1.58726e-21	1.13046e-18	Sig. genes
2	2274	ENSG00000100345.22	MYH9		1802.34	0.472472	0.0504063	9.37329	7.03084e-21	4.34215e-18	Sig. genes
3	8660	ENSG00000145147.20	SLIT2	slit guidance ligand 2 [Source:HGNC Symbol;Acc:HGNC:11086]	132.029	2.70844	0.326807	8.28759	1.15568e-16	4.5996e-14	Sig. genes
4	553	ENSG00000038427.16	VCAN	versican [Source:HGNC Symbol;Acc:HGNC:2464]	108.88	2.48498	0.323098	7.6911	1.45877e-14	4.35444e-12	Sig. genes
5	9280	ENSG00000150093.20	ITGB1	integrin subunit beta 1 [Source:HGNC Symbol;Acc:HGNC:6153]	2972.02	0.74358	0.117916	6.30604	2.86271e-10	3.85498e-08	Sig. genes
6	11196	ENSG00000164007.11	CLDN19	claudin 19 [Source:HGNC Symbol;Acc:HGNC:2040]	30.8288	-1.61286	0.277406	-5.81408	6.09674e-09	5.83918e-07	Sig. genes
7	11037	ENSG00000163531.17	NFASC	neurofascin [Source:HGNC Symbol;Acc:HGNC:29866]	233.46	0.878085	0.154405	5.68689	1.29371e-08	1.12478e-06	Sig. genes
8	10389	ENSG00000159840.16	ZYX	zyxin [Source:HGNC Symbol;Acc:HGNC:13200]	374.942	0.570329	0.102144	5.5836	2.3559e-08	1.90924e-06	Sig. genes
9	6422	ENSG00000131236.18	CAP1	cyclase associated actin cytoskeleton regulatory protein 1 [Source:HGNC Symbol;Acc:HGNC:20040]	1507.45	0.42272	0.0818873	5.16222	2.44036e-07	1.51235e-05	Sig. genes
10	1633	ENSG00000084636.18	COL16A1	collagen type XVI alpha 1 chain [Source:HGNC Symbol;Acc:HGNC:2193]	50.7974	1.33805	0.263694	5.07425	3.89023e-07	2.27693e-05	Sig. genes
11	1684	ENSG00000086062.13	B4GALT1	beta-1,4-galactosyltransferase 1 [Source:HGNC Symbol;Acc:HGNC:924]	1178.6	0.485864	0.0977449	4.97073	6.67004e-07	3.63101e-05	Sig. genes
12	3786	ENSG00000110492.16	MDK		223.559	0.479486	0.0978872	4.89836	9.66411e-07	5.06094e-05	Sig. genes
13	17619	ENSG00000198053.12	SIRPA	signal regulatory protein alpha [Source:HGNC Symbol;Acc:HGNC:9662]	99.8607	0.708549	0.144731	4.89561	9.79988e-07	5.11708e-05	Sig. genes
14	3056	ENSG00000105221.18	AKT2	AKT serine/threonine kinase 2 [Source:HGNC Symbol;Acc:HGNC:392]	570.078	-0.353196	0.0722632	-4.88764	1.02054e-06	5.29796e-05	Sig. genes
15	11767	ENSG00000166147.15	FBN1	fibrillin 1 [Source:HGNC Symbol;Acc:HGNC:3603]	361.331	0.505871	0.112853	4.48255	7.37564e-06	0.000292899	Sig. genes
16	6043	ENSG00000128591.16	FLNC	filamin C [Source:HGNC Symbol;Acc:HGNC:3756]	44.918	1.32634	0.300907	4.40782	1.04415e-05	0.000403035	Sig. genes
17	783	ENSG00000058085.15	LAMC2	laminin subunit gamma 2 [Source:HGNC Symbol;Acc:HGNC:6493]	510.437	0.979015	0.228769	4.27949	1.87326e-05	0.000661738	Sig. genes
18	6264	ENSG00000130402.13	ACTN4	actinin alpha 4 [Source:HGNC Symbol;Acc:HGNC:166]	2665.08	0.379805	0.091603	4.14621	3.38025e-05	0.00110475	Sig. genes
19	2858	ENSG00000103855.18	CD276	CD276 molecule [Source:HGNC Symbol;Acc:HGNC:19137]	99.6148	0.595957	0.144095	4.13585	3.53642e-05	0.00114741	Sig. genes
20	10324	ENSG00000159251.8	ACTC1	actin alpha cardiac muscle 1 [Source:HGNC Symbol;Acc:HGNC:143]	4.872	3.03879	0.741887	4.09603	4.20302e-05	0.00133943	Sig. genes
21	2502	ENSG00000101335.10	MYL9	myosin light chain 9 [Source:HGNC Symbol;Acc:HGNC:15754]	778.702	0.524365	0.128743	4.07295	4.64205e-05	0.00144842	Sig. genes
22	330	ENSG00000013297.12	CLDN11	claudin 11 [Source:HGNC Symbol;Acc:HGNC:8514]	727.131	-0.570471	0.142568	-4.0014	6.29696e-05	0.00185797	Sig. genes
23	1317	ENSG00000075624.17	ACTB	actin beta [Source:HGNC Symbol;Acc:HGNC:132]	4352.68	0.513604	0.128713	3.99031	6.59879e-05	0.00191237	Sig. genes
24	15628	ENSG00000184009.13	ACTG1	actin gamma 1 [Source:HGNC Symbol;Acc:HGNC:144]	6761.49	0.406522	0.104592	3.88673	0.000101605	0.00267609	Sig. genes
25	11272	ENSG00000164171.11	ITGA2	integrin subunit alpha 2 [Source:HGNC Symbol;Acc:HGNC:6137]	440.017	0.976285	0.255538	3.8205	0.000133181	0.00335009	Sig. genes
26	11435	ENSG00000164761.9	TNFRSF11B	TNF receptor superfamily member 11b [Source:HGNC Symbol;Acc:HGNC:11909]	106.185	1.02797	0.275628	3.72954	0.000191832	0.00448526	Sig. genes
27	9102	ENSG00000148484.18	RSU1	Ras suppressor protein 1 [Source:HGNC Symbol;Acc:HGNC:10464]	244.624	0.284654	0.0786449	3.61948	0.000295193	0.0062493	Sig. genes
28	17498	ENSG00000197702.14	PARVA	parvin alpha [Source:HGNC Symbol;Acc:HGNC:14652]	619.808	0.264051	0.0739092	3.57264	0.000353402	0.00715999	Sig. genes
29	6697	ENSG00000133026.13	MYH10		1143.98	-0.590158	0.174356	-3.3848	0.000712311	0.0122905	Sig. genes
30	520	ENSG00000035403.18	VCL	vinculin [Source:HGNC Symbol;Acc:HGNC:12665]	449.127	0.299688	0.0889158	3.37047	0.000750413	0.0128121	Sig. genes
31	8914	ENSG00000147065.17	MSN	moesin [Source:HGNC Symbol;Acc:HGNC:7373]	993.018	0.340051	0.101314	3.35641	0.000789626	0.0133166	Sig. genes
32	1556	ENSG00000082074.19	FYB1	FYN binding protein 1 [Source:HGNC Symbol;Acc:HGNC:4036]	51.8063	0.991993	0.299507	3.31208	0.000926043	0.0149823	Sig. genes
33	5975	ENSG00000127990.19	SGCE	sarcoglycan epsilon [Source:HGNC Symbol;Acc:HGNC:10808]	37.2503	0.987646	0.304273	3.24592	0.00117071	0.0179978	Sig. genes
34	5706	ENSG00000125753.14	VASP	vasodilator stimulated phosphoprotein [Source:HGNC Symbol;Acc:HGNC:12652]	89.8892	0.422945	0.13165	3.21265	0.00131517	0.019744	Sig. genes
35	8163	ENSG00000141738.14	GRB7	growth factor receptor bound protein 7 [Source:HGNC Symbol;Acc:HGNC:4567]	97.8823	-0.537215	0.173018	-3.10498	0.00190294	0.0262976	Sig. genes
36	3545	ENSG00000108518.8	PFN1	profilin 1 [Source:HGNC Symbol;Acc:HGNC:8881]	334.056	0.361696	0.117324	3.08289	0.00205002	0.0277222	Sig. genes
37	5087	ENSG00000120708.17	TGFBI	transforming growth factor beta induced [Source:HGNC Symbol;Acc:HGNC:11771]	4317.82	0.60512	0.199697	3.03018	0.00244404	0.0316735	Sig. genes
38	6595	ENSG00000132470.14	ITGB4	integrin subunit beta 4 [Source:HGNC Symbol;Acc:HGNC:6158]	577.776	0.548838	0.185432	2.95977	0.00307865	0.0372307	Sig. genes
39	379	ENSG00000018236.15	CNTN1	contactin 1 [Source:HGNC Symbol;Acc:HGNC:2171]	69.7411	-0.500088	0.180873	-2.76486	0.00569469	0.0587511	Non-sig.
40	5823	ENSG00000126458.4	RRAS	RAS related [Source:HGNC Symbol;Acc:HGNC:10447]	211.433	0.305222	0.110613	2.75937	0.00579127	0.0594201	Non-sig.
41	7743	ENSG00000138796.18	HADH	hydroxyacyl-CoA dehydrogenase [Source:HGNC Symbol;Acc:HGNC:4799]	74.6066	-0.460318	0.170837	-2.69449	0.00704962	0.0676738	Non-sig.
42	1732	ENSG00000087245.13	MMP2	matrix metallopeptidase 2 [Source:HGNC Symbol;Acc:HGNC:7166]	623.692	0.867449	0.32206	2.69344	0.00707194	0.0677318	Non-sig.
43	7790	ENSG00000139211.7	AMIGO2	adhesion molecule with Ig like domain 2 [Source:HGNC Symbol;Acc:HGNC:24073]	556.162	-0.266775	0.09995	-2.66909	0.0076058	0.0712548	Non-sig.
44	6198	ENSG00000130005.13	GAMT	guanidinoacetate N-methyltransferase [Source:HGNC Symbol;Acc:HGNC:4136]	71.847	-0.393122	0.149299	-2.63312	0.00846042	0.0769168	Non-sig.
45	4174	ENSG00000113361.13	CDH6	cadherin 6 [Source:HGNC Symbol;Acc:HGNC:1765]	4.26322	2.43846	0.927094	2.63022	0.00853292	0.0772621	Non-sig.
46	895	ENSG00000064666.15	CNN2	calponin 2 [Source:HGNC Symbol;Acc:HGNC:2156]	530.029	0.253012	0.0970851	2.60608	0.00915845	0.081363	Non-sig.
47	3812	ENSG00000110799.14	VWF	von Willebrand factor [Source:HGNC Symbol;Acc:HGNC:12726]	14.6864	-1.2997	0.500628	-2.59613	0.00942806	0.083017	Non-sig.
48	1316	ENSG00000075618.18	FSCN1	fascin actin-bundling protein 1 [Source:HGNC Symbol;Acc:HGNC:11148]	149.299	0.396258	0.162078	2.44486	0.0144909	0.112158	Non-sig.
49	4835	ENSG00000118680.14	MYL12B	myosin light chain 12B [Source:HGNC Symbol;Acc:HGNC:29827]	532.75	0.283395	0.116713	2.42814	0.0151763	0.116257	Non-sig.
50	13254	ENSG00000172260.15	NEGR1	neuronal growth regulator 1 [Source:HGNC Symbol;Acc:HGNC:17302]	36.4325	0.726349	0.30295	2.39759	0.0165034	0.123317	Non-sig.
51	12762	ENSG00000170214.5	ADRA1B	adrenoceptor alpha 1B [Source:HGNC Symbol;Acc:HGNC:278]	36.4515	0.741136	0.31017	2.38945	0.0168734	0.124774	Non-sig.
52	13826	ENSG00000175161.14	CADM2	cell adhesion molecule 2 [Source:HGNC Symbol;Acc:HGNC:29849]	30.8281	0.912129	0.390566	2.3354	0.0195225	0.136262	Non-sig.
53	1012	ENSG00000067445.21	TRO		123.366	0.379172	0.163127	2.32439	0.0201045	0.139024	Non-sig.
54	10746	ENSG00000162512.16	SDC3	syndecan 3 [Source:HGNC Symbol;Acc:HGNC:10660]	92.6087	0.476843	0.207491	2.29813	0.0215543	0.144842	Non-sig.
55	3283	ENSG00000106299.8	WASL	WASP like actin nucleation promoting factor [Source:HGNC Symbol;Acc:HGNC:12735]	325.348	-0.226021	0.103338	-2.1872	0.0287281	0.17406	Non-sig.
56	680	ENSG00000050405.13	LIMA1		1164.3	0.330911	0.153864	2.15067	0.0315024	0.184081	Non-sig.
57	12397	ENSG00000168615.13	ADAM9	ADAM metallopeptidase domain 9 [Source:HGNC Symbol;Acc:HGNC:216]	258.966	0.242985	0.115328	2.1069	0.0351261	0.197708	Non-sig.
58	24	ENSG00000002586.20	CD99	CD99 molecule (Xg blood group) [Source:HGNC Symbol;Acc:HGNC:7082]	414.902	0.178716	0.0865682	2.06445	0.0389749	0.210888	Non-sig.
59	5707	ENSG00000125755.19	SYMPK	symplekin scaffold protein [Source:HGNC Symbol;Acc:HGNC:22935]	152.658	-0.223828	0.116571	-1.9201	0.054845	0.258285	Non-sig.
60	9798	ENSG00000154736.6	ADAMTS5	ADAM metallopeptidase with thrombospondin type 1 motif 5 [Source:HGNC Symbol;Acc:HGNC:221]	73.1066	0.573272	0.302618	1.89437	0.0581755	0.268889	Non-sig.
61	14642	ENSG00000179242.16	CDH4	cadherin 4 [Source:HGNC Symbol;Acc:HGNC:1763]	5.52319	1.18682	0.63386	1.87237	0.0611561	0.276811	Non-sig.
62	9716	ENSG00000154096.14	THY1	Thy-1 cell surface antigen [Source:HGNC Symbol;Acc:HGNC:11801]	21.341	0.673254	0.36962	1.82148	0.0685342	0.294765	Non-sig.
63	13162	ENSG00000171862.11	PTEN		312.877	0.328013	0.180665	1.81559	0.0694335	0.2971	Non-sig.
64	25	ENSG00000002586.20_PAR_Y	CD99		404.262	0.22123	0.122164	1.81092	0.0701525	0.298794	Non-sig.
65	6017	ENSG00000128340.15	RAC2	Rac family small GTPase 2 [Source:HGNC Symbol;Acc:HGNC:9802]	4.79673	1.00542	0.564639	1.78065	0.0749696	0.309736	Non-sig.
66	2419	ENSG00000100985.7	MMP9	matrix metallopeptidase 9 [Source:HGNC Symbol;Acc:HGNC:7176]	33.6426	0.878105	0.494764	1.77479	0.0759321	0.312578	Non-sig.
67	8033	ENSG00000140937.14	CDH11	cadherin 11 [Source:HGNC Symbol;Acc:HGNC:1750]	441.534	0.387948	0.223677	1.73441	0.0828449	0.328846	Non-sig.
68	17772	ENSG00000198561.16	CTNND1	catenin delta 1 [Source:HGNC Symbol;Acc:HGNC:2515]	454.498	-0.232417	0.134619	-1.72649	0.08426	0.332181	Non-sig.
69	5835	ENSG00000126562.17	WNK4	WNK lysine deficient protein kinase 4 [Source:HGNC Symbol;Acc:HGNC:14544]	19.9694	0.708021	0.418531	1.69168	0.0907067	0.346064	Non-sig.
70	16254	ENSG00000186480.13	INSIG1	insulin induced gene 1 [Source:HGNC Symbol;Acc:HGNC:6083]	354.337	-0.295954	0.177226	-1.66993	0.0949337	0.352825	Non-sig.
71	22653	ENSG00000214063.11	TSPAN4		559.03	-0.144826	0.0879227	-1.6472	0.0995172	0.362488	Non-sig.
72	2873	ENSG00000104067.17	TJP1	tight junction protein 1 [Source:HGNC Symbol;Acc:HGNC:11827]	579.021	-0.272335	0.16811	-1.61998	0.105237	0.375397	Non-sig.
73	130	ENSG00000006210.7	CX3CL1	C-X3-C motif chemokine ligand 1 [Source:HGNC Symbol;Acc:HGNC:10647]	48.9705	0.399286	0.253374	1.57587	0.115055	0.394426	Non-sig.
74	1322	ENSG00000075711.21	DLG1	discs large MAGUK scaffold protein 1 [Source:HGNC Symbol;Acc:HGNC:2900]	1027.35	0.202117	0.132644	1.52375	0.127571	0.416857	Non-sig.
75	50065	ENSG00000269335.6	IKBKG		172.4	0.167588	0.111763	1.4995	0.133745	0.426375	Non-sig.
76	13963	ENSG00000175866.16	BAIAP2	BAR/IMD domain containing adaptor protein 2 [Source:HGNC Symbol;Acc:HGNC:947]	97.0099	0.321832	0.217815	1.47755	0.139529	0.433998	Non-sig.
77	17242	ENSG00000196878.15	LAMB3	laminin subunit beta 3 [Source:HGNC Symbol;Acc:HGNC:6490]	104.207	0.63547	0.434799	1.46152	0.143871	0.442586	Non-sig.
78	4377	ENSG00000115194.11	SLC30A3	solute carrier family 30 member 3 [Source:HGNC Symbol;Acc:HGNC:11014]	4.24016	0.891411	0.619432	1.43908	0.150128	0.453042	Non-sig.
79	1255	ENSG00000074211.14	PPP2R2C	protein phosphatase 2 regulatory subunit Bgamma [Source:HGNC Symbol;Acc:HGNC:9306]	94.5431	0.830759	0.578516	1.43602	0.150997	0.454362	Non-sig.
80	716	ENSG00000053747.17	LAMA3	laminin subunit alpha 3 [Source:HGNC Symbol;Acc:HGNC:6483]	31.8007	0.91934	0.640703	1.43489	0.151318	0.454791	Non-sig.
81	226	ENSG00000008710.20	PKD1	polycystin 1, transient receptor potential channel interacting [Source:HGNC Symbol;Acc:HGNC:9008]	264.781	0.201374	0.140359	1.4347	0.151372	0.454858	Non-sig.
82	4660	ENSG00000117020.19	AKT3	AKT serine/threonine kinase 3 [Source:HGNC Symbol;Acc:HGNC:393]	277.659	-0.233291	0.162915	-1.43198	0.152148	0.456292	Non-sig.
83	2025	ENSG00000095321.18	CRAT	carnitine O-acetyltransferase [Source:HGNC Symbol;Acc:HGNC:2342]	135.459	-0.208674	0.150564	-1.38595	0.165763	0.475694	Non-sig.
84	9231	ENSG00000149573.9	MPZL2	myelin protein zero like 2 [Source:HGNC Symbol;Acc:HGNC:3496]	135.326	-0.537839	0.388763	-1.38346	0.166524	0.47652	Non-sig.
85	556	ENSG00000039068.20	CDH1	cadherin 1 [Source:HGNC Symbol;Acc:HGNC:1748]	30.2096	0.694472	0.504934	1.37537	0.169017	0.480033	Non-sig.
86	10772	ENSG00000162614.19	NEXN	nexilin F-actin binding protein [Source:HGNC Symbol;Acc:HGNC:29557]	96.6904	0.27196	0.200188	1.35852	0.174299	0.486775	Non-sig.
87	12722	ENSG00000169992.10	NLGN2	neuroligin 2 [Source:HGNC Symbol;Acc:HGNC:14290]	82.1081	-0.142682	0.106752	-1.33658	0.181361	0.495165	Non-sig.
88	3306	ENSG00000106404.14	CLDN15	claudin 15 [Source:HGNC Symbol;Acc:HGNC:2036]	36.871	0.373113	0.280322	1.33102	0.183183	0.497845	Non-sig.
89	16276	ENSG00000186575.19	NF2	neurofibromin 2 [Source:HGNC Symbol;Acc:HGNC:7773]	267.545	-0.157207	0.118593	-1.3256	0.184971	0.499975	Non-sig.
90	8730	ENSG00000145715.15	RASA1	RAS p21 protein activator 1 [Source:HGNC Symbol;Acc:HGNC:9871]	162.549	0.148417	0.11546	1.28544	0.198637	0.518202	Non-sig.
91	5021	ENSG00000120217.14	CD274	CD274 molecule [Source:HGNC Symbol;Acc:HGNC:17635]	38.8761	0.362022	0.292259	1.2387	0.215456	0.537815	Non-sig.
92	1478	ENSG00000079819.19	EPB41L2	erythrocyte membrane protein band 4.1 like 2 [Source:HGNC Symbol;Acc:HGNC:3379]	1692.93	-0.128886	0.107201	-1.20228	0.229254	0.555758	Non-sig.
93	8317	ENSG00000143127.13	ITGA10	integrin subunit alpha 10 [Source:HGNC Symbol;Acc:HGNC:6135]	68.5554	-0.367999	0.312058	-1.17926	0.238293	0.5662	Non-sig.
94	111	ENSG00000005884.18	ITGA3	integrin subunit alpha 3 [Source:HGNC Symbol;Acc:HGNC:6139]	1028.28	-0.0729179	0.0618562	-1.17883	0.238466	0.56651	Non-sig.
95	8341	ENSG00000143217.9	NECTIN4	nectin cell adhesion molecule 4 [Source:HGNC Symbol;Acc:HGNC:19688]	32.8073	0.715479	0.607988	1.1768	0.239276	0.566935	Non-sig.
96	2828	ENSG00000103496.15	STX4	syntaxin 4 [Source:HGNC Symbol;Acc:HGNC:11439]	248.884	0.0932281	0.0797098	1.16959	0.242164	0.569406	Non-sig.
97	4711	ENSG00000117461.15	PIK3R3	phosphoinositide-3-kinase regulatory subunit 3 [Source:HGNC Symbol;Acc:HGNC:8981]	13.6171	-0.523045	0.448455	-1.16633	0.243483	0.570783	Non-sig.
98	6689	ENSG00000132964.12	CDK8	cyclin dependent kinase 8 [Source:HGNC Symbol;Acc:HGNC:1779]	44.9601	0.260384	0.224442	1.16014	0.245991	0.573137	Non-sig.
99	7872	ENSG00000139725.8	RHOF	ras homolog family member F, filopodia associated [Source:HGNC Symbol;Acc:HGNC:15703]	96.0186	0.26609	0.233714	1.13853	0.2549	0.58331	Non-sig.
100	5971	ENSG00000127955.17	GNAI1	G protein subunit alpha i1 [Source:HGNC Symbol;Acc:HGNC:4384]	12.9459	0.621817	0.561538	1.10735	0.268144	0.598202	Non-sig.
101	17315	ENSG00000197122.12	SRC		32.1861	0.286247	0.258861	1.1058	0.268814	0.598739	Non-sig.
102	19912	ENSG00000204560.10	DHX16	DEAH-box helicase 16 [Source:HGNC Symbol;Acc:HGNC:2739]	95.4541	-0.152753	0.138539	-1.1026	0.270202	0.600278	Non-sig.
103	16888	ENSG00000189143.10	CLDN4	claudin 4 [Source:HGNC Symbol;Acc:HGNC:2046]	92.4492	0.419521	0.395641	1.06036	0.288982	0.62209	Non-sig.
104	8598	ENSG00000144668.12	ITGA9	integrin subunit alpha 9 [Source:HGNC Symbol;Acc:HGNC:6145]	7.42089	0.486034	0.48253	1.00726	0.313809	0.644874	Non-sig.
105	10463	ENSG00000160293.17	VAV2	vav guanine nucleotide exchange factor 2 [Source:HGNC Symbol;Acc:HGNC:12658]	202.375	0.137628	0.145366	0.946771	0.343756	0.672565	Non-sig.
106	6468	ENSG00000131558.15	EXOC4	exocyst complex component 4 [Source:HGNC Symbol;Acc:HGNC:30389]	178.856	-0.125735	0.141501	-0.888575	0.374232	0.698758	Non-sig.
107	15649	ENSG00000184113.10	CLDN5	claudin 5 [Source:HGNC Symbol;Acc:HGNC:2047]	10.1457	0.634705	0.725125	0.875304	0.381409	0.703867	Non-sig.
108	15088	ENSG00000181754.7	AMIGO1	adhesion molecule with Ig like domain 1 [Source:HGNC Symbol;Acc:HGNC:20824]	94.7754	-0.122077	0.140475	-0.869024	0.384834	0.706629	Non-sig.
109	8865	ENSG00000146648.20	EGFR	epidermal growth factor receptor [Source:HGNC Symbol;Acc:HGNC:3236]	541.336	0.101257	0.118275	0.85612	0.391932	0.712856	Non-sig.
110	3743	ENSG00000110076.19	NRXN2		16.5617	0.325828	0.384366	0.847703	0.396603	0.715684	Non-sig.
111	5685	ENSG00000125651.14	GTF2F1	general transcription factor IIF subunit 1 [Source:HGNC Symbol;Acc:HGNC:4652]	341.801	-0.0914676	0.107968	-0.847172	0.396899	0.715887	Non-sig.
112	6170	ENSG00000129675.16	ARHGEF6	Rac/Cdc42 guanine nucleotide exchange factor 6 [Source:HGNC Symbol;Acc:HGNC:685]	131.619	-0.15332	0.184723	-0.829996	0.406541	0.72233	Non-sig.
113	5110	ENSG00000120896.14	SORBS3	sorbin and SH3 domain containing 3 [Source:HGNC Symbol;Acc:HGNC:30907]	161.247	0.0782216	0.096736	0.808609	0.41874	0.730175	Non-sig.
114	13578	ENSG00000173801.17	JUP	junction plakoglobin [Source:HGNC Symbol;Acc:HGNC:6207]	208.575	0.184616	0.230904	0.799538	0.423979	0.734946	Non-sig.
115	11749	ENSG00000166086.13	JAM3	junctional adhesion molecule 3 [Source:HGNC Symbol;Acc:HGNC:15532]	585.134	-0.07717	0.0974385	-0.791987	0.428368	0.738765	Non-sig.
116	7412	ENSG00000137103.20	TMEM8B	transmembrane protein 8B [Source:HGNC Symbol;Acc:HGNC:21427]	142.501	-0.0989246	0.129286	-0.765163	0.444175	0.75119	Non-sig.
117	6450	ENSG00000131462.9	TUBG1	tubulin gamma 1 [Source:HGNC Symbol;Acc:HGNC:12417]	220.309	-0.0888578	0.120317	-0.738528	0.460193	0.763083	Non-sig.
118	6954	ENSG00000134762.17	DSC3	desmocollin 3 [Source:HGNC Symbol;Acc:HGNC:3037]	117.112	0.530039	0.733757	0.722364	0.470071	0.769328	Non-sig.
119	11595	ENSG00000165458.14	INPPL1		482.976	-0.111568	0.157075	-0.710284	0.477528	0.774616	Non-sig.
120	9270	ENSG00000149930.18	TAOK2	TAO kinase 2 [Source:HGNC Symbol;Acc:HGNC:16835]	89.8065	-0.0978674	0.139158	-0.703284	0.481878	0.778069	Non-sig.
121	9980	ENSG00000156453.14	PCDH1	protocadherin 1 [Source:HGNC Symbol;Acc:HGNC:8655]	212.512	0.202562	0.29325	0.690749	0.489723	0.782073	Non-sig.
122	4346	ENSG00000114948.13	ADAM23	ADAM metallopeptidase domain 23 [Source:HGNC Symbol;Acc:HGNC:202]	5.32396	0.386803	0.560755	0.689789	0.490327	0.782757	Non-sig.
123	12101	ENSG00000167508.12	MVD	mevalonate diphosphate decarboxylase [Source:HGNC Symbol;Acc:HGNC:7529]	115.55	0.225397	0.339977	0.662979	0.507344	0.793237	Non-sig.
124	12587	ENSG00000169398.19	PTK2		132.387	-0.130253	0.197655	-0.658989	0.509903	0.794958	Non-sig.
125	3775	ENSG00000110400.11	NECTIN1	nectin cell adhesion molecule 1 [Source:HGNC Symbol;Acc:HGNC:9706]	65.1102	-0.265397	0.422717	-0.627836	0.530111	0.807956	Non-sig.
126	14439	ENSG00000178184.16	PARD6G	par-6 family cell polarity regulator gamma [Source:HGNC Symbol;Acc:HGNC:16076]	27.4981	0.271732	0.44418	0.611762	0.540695	0.813374	Non-sig.
127	12028	ENSG00000167123.19	CERCAM		50.2701	0.203088	0.334495	0.60715	0.543751	0.814565	Non-sig.
128	17586	ENSG00000197965.12	MPZL1	myelin protein zero like 1 [Source:HGNC Symbol;Acc:HGNC:7226]	544.665	0.0549853	0.0915564	0.600562	0.548132	0.817348	Non-sig.
129	19808	ENSG00000204304.12	PBX2	PBX homeobox 2 [Source:HGNC Symbol;Acc:HGNC:8633]	16.8524	-0.219641	0.365903	-0.60027	0.548326	0.817348	Non-sig.
130	13221	ENSG00000172137.19	CALB2	calbindin 2 [Source:HGNC Symbol;Acc:HGNC:1435]	21.8708	0.260969	0.441208	0.591488	0.554194	0.820688	Non-sig.
131	12271	ENSG00000168067.12	MAP4K2	mitogen-activated protein kinase kinase kinase kinase 2 [Source:HGNC Symbol;Acc:HGNC:6864]	115.119	-0.0718992	0.130811	-0.54964	0.582566	0.835436	Non-sig.
132	11009	ENSG00000163466.16	ARPC2	actin related protein 2/3 complex subunit 2 [Source:HGNC Symbol;Acc:HGNC:705]	1627.79	0.0539289	0.0996261	0.541313	0.588292	0.838686	Non-sig.
133	10803	ENSG00000162706.13	CADM3	cell adhesion molecule 3 [Source:HGNC Symbol;Acc:HGNC:17601]	107.724	0.112416	0.208052	0.540329	0.58897	0.838977	Non-sig.
134	694	ENSG00000051382.9	PIK3CB	phosphatidylinositol-4,5-bisphosphate 3-kinase catalytic subunit beta [Source:HGNC Symbol;Acc:HGNC:8976]	87.7558	-0.11961	0.223128	-0.536058	0.591919	0.84037	Non-sig.
135	4277	ENSG00000114353.17	GNAI2	G protein subunit alpha i2 [Source:HGNC Symbol;Acc:HGNC:4385]	1143.83	0.0313015	0.0629663	0.497116	0.619107	0.852546	Non-sig.
136	19836	ENSG00000204381.12	LAYN	layilin [Source:HGNC Symbol;Acc:HGNC:29471]	132.986	0.07944	0.159774	0.497202	0.619047	0.852546	Non-sig.
137	10797	ENSG00000162692.12	VCAM1	vascular cell adhesion molecule 1 [Source:HGNC Symbol;Acc:HGNC:12663]	388.021	-0.192562	0.390426	-0.493211	0.621863	0.853624	Non-sig.
138	12499	ENSG00000169047.6	IRS1	insulin receptor substrate 1 [Source:HGNC Symbol;Acc:HGNC:6125]	83.9037	-0.107669	0.218816	-0.492053	0.622682	0.854381	Non-sig.
139	10014	ENSG00000156711.17	MAPK13	mitogen-activated protein kinase 13 [Source:HGNC Symbol;Acc:HGNC:6875]	92.913	0.105645	0.232914	0.453579	0.650132	0.867727	Non-sig.
140	17194	ENSG00000196712.18	NF1		389.352	0.0725867	0.163426	0.444155	0.65693	0.870221	Non-sig.
141	15968	ENSG00000185386.15	MAPK11	mitogen-activated protein kinase 11 [Source:HGNC Symbol;Acc:HGNC:6873]	37.8055	0.10549	0.240868	0.437959	0.661416	0.872646	Non-sig.
142	17087	ENSG00000196405.13	EVL	Enah/Vasp-like [Source:HGNC Symbol;Acc:HGNC:20234]	226.932	0.0761343	0.185698	0.409991	0.681813	0.88079	Non-sig.
143	604	ENSG00000044115.21	CTNNA1	catenin alpha 1 [Source:HGNC Symbol;Acc:HGNC:2509]	677.405	-0.0426817	0.109964	-0.388143	0.69791	0.88769	Non-sig.
144	6225	ENSG00000130202.10	NECTIN2	nectin cell adhesion molecule 2 [Source:HGNC Symbol;Acc:HGNC:9707]	262.292	-0.0379548	0.101517	-0.373876	0.708497	0.892473	Non-sig.
145	5995	ENSG00000128245.15	YWHAH	tyrosine 3-monooxygenase/tryptophan 5-monooxygenase activation protein eta [Source:HGNC Symbol;Acc:HGNC:12853]	144.827	-0.0565514	0.151709	-0.372762	0.709325	0.892826	Non-sig.
146	1927	ENSG00000091436.17	MAP3K20	mitogen-activated protein kinase kinase kinase 20 [Source:HGNC Symbol;Acc:HGNC:17797]	821.785	0.0354413	0.0952265	0.372178	0.70976	0.893122	Non-sig.
147	15115	ENSG00000181885.18	CLDN7	claudin 7 [Source:HGNC Symbol;Acc:HGNC:2049]	31.4453	0.178343	0.487664	0.365709	0.714582	0.894416	Non-sig.
148	76	ENSG00000005020.13	SKAP2	src kinase associated phosphoprotein 2 [Source:HGNC Symbol;Acc:HGNC:15687]	69.3476	0.0973659	0.268086	0.363189	0.716464	0.895535	Non-sig.
149	1873	ENSG00000090339.9	ICAM1	intercellular adhesion molecule 1 [Source:HGNC Symbol;Acc:HGNC:5344]	190.57	-0.0340223	0.102124	-0.333146	0.739024	0.906694	Non-sig.
150	14702	ENSG00000179593.16	ALOX15B	arachidonate 15-lipoxygenase type B [Source:HGNC Symbol;Acc:HGNC:434]	4.77729	0.302517	1.00955	0.299655	0.76444	0.917636	Non-sig.
151	764	ENSG00000056558.11	TRAF1	TNF receptor associated factor 1 [Source:HGNC Symbol;Acc:HGNC:12031]	18.8796	0.0869803	0.292823	0.297041	0.766435	0.918922	Non-sig.
152	13629	ENSG00000174059.17	CD34	CD34 molecule [Source:HGNC Symbol;Acc:HGNC:1662]	40.0729	-0.0850484	0.294739	-0.288555	0.772922	0.9219	Non-sig.
153	4245	ENSG00000114013.16	CD86	CD86 molecule [Source:HGNC Symbol;Acc:HGNC:1705]	7.64743	0.172539	0.599909	0.287609	0.773646	0.921951	Non-sig.
154	1184	ENSG00000072195.15	SPEG	striated muscle enriched protein kinase [Source:HGNC Symbol;Acc:HGNC:16901]	53.359	0.0603522	0.225818	0.26726	0.789269	0.928399	Non-sig.
155	13747	ENSG00000174775.18	HRAS	HRas proto-oncogene, GTPase [Source:HGNC Symbol;Acc:HGNC:5173]	144.413	-0.036389	0.140878	-0.258302	0.796174	0.930593	Non-sig.
156	10157	ENSG00000157978.12	LDLRAP1	low density lipoprotein receptor adaptor protein 1 [Source:HGNC Symbol;Acc:HGNC:18640]	508.749	-0.0172589	0.0750883	-0.229848	0.81821	0.938466	Non-sig.
157	46566	ENSG00000261371.6	PECAM1	platelet and endothelial cell adhesion molecule 1 [Source:HGNC Symbol;Acc:HGNC:8823]	49.1499	0.0838262	0.39236	0.213646	0.830823	0.943461	Non-sig.
158	14353	ENSG00000177707.11	NECTIN3	nectin cell adhesion molecule 3 [Source:HGNC Symbol;Acc:HGNC:17664]	344.656	-0.0269472	0.132128	-0.203947	0.838395	0.945404	Non-sig.
159	12367	ENSG00000168487.20	BMP1	bone morphogenetic protein 1 [Source:HGNC Symbol;Acc:HGNC:1067]	99.518	0.0347566	0.186564	0.186298	0.852211	0.951446	Non-sig.
160	12549	ENSG00000169231.13	THBS3	thrombospondin 3 [Source:HGNC Symbol;Acc:HGNC:11787]	42.7664	0.0355307	0.194958	0.182248	0.855388	0.952634	Non-sig.
161	5470	ENSG00000124181.14	PLCG1		130.768	0.0336536	0.228413	0.147337	0.882866	0.961204	Non-sig.
162	3996	ENSG00000112062.11	MAPK14	mitogen-activated protein kinase 14 [Source:HGNC Symbol;Acc:HGNC:6876]	155.06	0.0122107	0.0949355	0.128621	0.897658	0.966584	Non-sig.
163	942	ENSG00000065618.21	COL17A1	collagen type XVII alpha 1 chain [Source:HGNC Symbol;Acc:HGNC:2194]	336.171	-0.0606093	0.473538	-0.127992	0.898155	0.966794	Non-sig.
164	8902	ENSG00000146950.13	SHROOM2	shroom family member 2 [Source:HGNC Symbol;Acc:HGNC:630]	5.36297	-0.0905496	0.767207	-0.118025	0.906048	0.970247	Non-sig.
165	6287	ENSG00000130545.16	CRB3	crumbs cell polarity complex component 3 [Source:HGNC Symbol;Acc:HGNC:20237]	9.01356	-0.0426775	0.421116	-0.101344	0.919277	0.975255	Non-sig.
166	11500	ENSG00000165025.15	SYK	spleen associated tyrosine kinase [Source:HGNC Symbol;Acc:HGNC:11491]	16.1428	0.0527914	0.551601	0.0957058	0.923754	0.976704	Non-sig.
167	8418	ENSG00000143537.14	ADAM15	ADAM metallopeptidase domain 15 [Source:HGNC Symbol;Acc:HGNC:193]	384.483	-0.00732941	0.0884613	-0.0828544	0.933967	0.97992	Non-sig.
168	838	ENSG00000062038.15	CDH3	cadherin 3 [Source:HGNC Symbol;Acc:HGNC:1762]	52.5292	-0.0230146	0.347679	-0.0661949	0.947223	0.984549	Non-sig.
169	1532	ENSG00000081237.20	PTPRC	protein tyrosine phosphatase receptor type C [Source:HGNC Symbol;Acc:HGNC:9666]	15.2276	-0.0217401	0.509316	-0.042685	0.965953	0.991478	Non-sig.
170	11663	ENSG00000165699.15	TSC1	TSC complex subunit 1 [Source:HGNC Symbol;Acc:HGNC:12362]	275.583	0.00322356	0.140028	0.0230207	0.981634	0.995079	Non-sig.
171	9473	ENSG00000151923.18	TIAL1	TIA1 cytotoxic granule associated RNA binding protein like 1 [Source:HGNC Symbol;Acc:HGNC:11804]	436.376	-0.00147377	0.0872771	-0.0168861	0.986527	0.996414	Non-sig.
172	10513	ENSG00000160691.19	SHC1	SHC adaptor protein 1 [Source:HGNC Symbol;Acc:HGNC:10840]	888.279	-0.000937171	0.0806463	-0.0116207	0.990728	0.997691	Non-sig.

## Sheet: G2M_CHECKPOINT Endo
	V1	gene_id	gene_name	description	baseMean	log2FoldChange	lfcSE	stat	pvalue	padj	sig
1	3748	ENSG00000110092.4	CCND1	cyclin D1 [Source:HGNC Symbol;Acc:HGNC:1582]	908.692	1.23261	0.128799	9.57003	1.0687e-21	7.97521e-19	Sig. genes
2	11986	ENSG00000166949.17	SMAD3	SMAD family member 3 [Source:HGNC Symbol;Acc:HGNC:6769]	594.914	-0.627791	0.0866155	-7.24803	4.2289e-13	9.42963e-11	Sig. genes
3	7831	ENSG00000139514.13	SLC7A1	solute carrier family 7 member 1 [Source:HGNC Symbol;Acc:HGNC:11057]	423.123	0.782038	0.131772	5.93479	2.94222e-09	3.09971e-07	Sig. genes
4	11204	ENSG00000164032.12	H2AZ1	H2A.Z variant histone 1 [Source:HGNC Symbol;Acc:HGNC:4741]	1206.92	0.446862	0.0822869	5.43054	5.61837e-08	4.15806e-06	Sig. genes
5	7450	ENSG00000137309.20	HMGA1	high mobility group AT-hook 1 [Source:HGNC Symbol;Acc:HGNC:5010]	934.735	0.609683	0.113976	5.3492	8.8342e-08	6.25378e-06	Sig. genes
6	3893	ENSG00000111371.16	SLC38A1	solute carrier family 38 member 1 [Source:HGNC Symbol;Acc:HGNC:13447]	547.357	0.519215	0.102682	5.05653	4.26963e-07	2.48276e-05	Sig. genes
7	5099	ENSG00000120802.14	TMPO	thymopoietin [Source:HGNC Symbol;Acc:HGNC:11875]	191.381	0.702035	0.148426	4.72987	2.24664e-06	0.000102409	Sig. genes
8	4480	ENSG00000115758.13	ODC1	ornithine decarboxylase 1 [Source:HGNC Symbol;Acc:HGNC:8109]	181.405	0.921832	0.198989	4.63257	3.61151e-06	0.000154005	Sig. genes
9	892	ENSG00000064651.14	SLC12A2	solute carrier family 12 member 2 [Source:HGNC Symbol;Acc:HGNC:10911]	853.871	-0.478642	0.11148	-4.29352	1.75865e-05	0.000623711	Sig. genes
10	5615	ENSG00000125148.7	MT2A	metallothionein 2A [Source:HGNC Symbol;Acc:HGNC:7406]	13074.7	0.978738	0.239983	4.07836	4.53538e-05	0.00142506	Sig. genes
11	7392	ENSG00000136997.21	MYC	MYC proto-oncogene, bHLH transcription factor [Source:HGNC Symbol;Acc:HGNC:7553]	28.1443	1.11059	0.280477	3.95965	7.50593e-05	0.00213045	Sig. genes
12	4030	ENSG00000112242.15	E2F3		169.303	0.395309	0.101023	3.91307	9.11319e-05	0.00244703	Sig. genes
13	2791	ENSG00000103257.9	SLC7A5	solute carrier family 7 member 5 [Source:HGNC Symbol;Acc:HGNC:11063]	132.105	0.746318	0.216218	3.45169	0.000557093	0.0100681	Sig. genes
14	483	ENSG00000029993.15	HMGB3	high mobility group box 3 [Source:HGNC Symbol;Acc:HGNC:5004]	67.0029	0.933032	0.29032	3.2138	0.00130989	0.0196813	Sig. genes
15	2007	ENSG00000094804.12	CDC6	cell division cycle 6 [Source:HGNC Symbol;Acc:HGNC:1744]	22.0847	1.89391	0.593433	3.19144	0.00141564	0.0210056	Sig. genes
16	4720	ENSG00000117505.13	DR1	down-regulator of transcription 1 [Source:HGNC Symbol;Acc:HGNC:3017]	166.429	-0.509986	0.165432	-3.08276	0.00205091	0.0277222	Sig. genes
17	2072	ENSG00000097007.19	ABL1	ABL proto-oncogene 1, non-receptor tyrosine kinase [Source:HGNC Symbol;Acc:HGNC:76]	210.069	0.34804	0.117683	2.95743	0.00310213	0.0374135	Sig. genes
18	2477	ENSG00000101224.18	CDC25B	cell division cycle 25B [Source:HGNC Symbol;Acc:HGNC:1726]	159.857	-0.390327	0.132496	-2.94596	0.00321957	0.0384905	Sig. genes
19	1648	ENSG00000085224.23	ATRX	ATRX chromatin remodeler [Source:HGNC Symbol;Acc:HGNC:886]	1563.16	-0.173506	0.0614693	-2.82265	0.00476284	0.0512943	Non-sig.
20	1074	ENSG00000069399.15	BCL3	BCL3 transcription coactivator [Source:HGNC Symbol;Acc:HGNC:998]	436.389	-0.384054	0.138429	-2.77437	0.00553089	0.0574251	Non-sig.
21	10672	ENSG00000162063.13	CCNF	cyclin F [Source:HGNC Symbol;Acc:HGNC:1591]	33.9383	-0.506944	0.183368	-2.76463	0.00569876	0.0587592	Non-sig.
22	2365	ENSG00000100644.17	HIF1A	hypoxia inducible factor 1 subunit alpha [Source:HGNC Symbol;Acc:HGNC:4910]	767.299	-0.303999	0.11239	-2.70486	0.00683342	0.0666956	Non-sig.
23	3079	ENSG00000105329.11	TGFB1	transforming growth factor beta 1 [Source:HGNC Symbol;Acc:HGNC:11766]	78.4867	0.547903	0.202787	2.70186	0.00689531	0.0668987	Non-sig.
24	3876	ENSG00000111276.12	CDKN1B	cyclin dependent kinase inhibitor 1B [Source:HGNC Symbol;Acc:HGNC:1785]	175.962	-0.269225	0.100969	-2.66641	0.00766658	0.0715894	Non-sig.
25	1581	ENSG00000082898.19	XPO1	exportin 1 [Source:HGNC Symbol;Acc:HGNC:12825]	347.27	0.660664	0.251588	2.62597	0.00864016	0.0779573	Non-sig.
26	3313	ENSG00000106462.12	EZH2	enhancer of zeste 2 polycomb repressive complex 2 subunit [Source:HGNC Symbol;Acc:HGNC:3527]	30.0817	0.858144	0.328212	2.6146	0.00893323	0.0800371	Non-sig.
27	1848	ENSG00000089685.15	BIRC5	baculoviral IAP repeat containing 5 [Source:HGNC Symbol;Acc:HGNC:593]	20.6237	1.14301	0.454605	2.51429	0.0119272	0.0976821	Non-sig.
28	13806	ENSG00000175063.17	UBE2C	ubiquitin conjugating enzyme E2 C [Source:HGNC Symbol;Acc:HGNC:15937]	8.48862	1.44914	0.581358	2.49268	0.0126782	0.102007	Non-sig.
29	17663	ENSG00000198176.13	TFDP1	transcription factor Dp-1 [Source:HGNC Symbol;Acc:HGNC:11749]	184.468	-0.314252	0.126706	-2.48016	0.0131323	0.104533	Non-sig.
30	7535	ENSG00000137807.16	KIF23	kinesin family member 23 [Source:HGNC Symbol;Acc:HGNC:6392]	13.1871	0.964989	0.401665	2.40247	0.0162847	0.122274	Non-sig.
31	7968	ENSG00000140464.20	PML	PML nuclear body scaffold [Source:HGNC Symbol;Acc:HGNC:9113]	158.258	0.334366	0.141557	2.36206	0.0181735	0.13062	Non-sig.
32	7744	ENSG00000138798.13	EGF	epidermal growth factor [Source:HGNC Symbol;Acc:HGNC:3229]	16.3483	1.59687	0.687274	2.32348	0.0201535	0.139201	Non-sig.
33	7705	ENSG00000138668.19	HNRNPD	heterogeneous nuclear ribonucleoprotein D [Source:HGNC Symbol;Acc:HGNC:5036]	708.932	-0.194761	0.0847513	-2.29802	0.0215605	0.144842	Non-sig.
34	494	ENSG00000032219.19	ARID4A	AT-rich interaction domain 4A [Source:HGNC Symbol;Acc:HGNC:9885]	379.397	-0.274361	0.124	-2.21259	0.0269261	0.167105	Non-sig.
35	9131	ENSG00000148773.14	MKI67	marker of proliferation Ki-67 [Source:HGNC Symbol;Acc:HGNC:7107]	67.3214	1.17494	0.538514	2.18182	0.0291225	0.175536	Non-sig.
36	7533	ENSG00000137804.14	NUSAP1	nucleolar and spindle associated protein 1 [Source:HGNC Symbol;Acc:HGNC:18538]	39.7667	-0.783387	0.359419	-2.17959	0.0292879	0.176199	Non-sig.
37	4744	ENSG00000117632.23	STMN1	stathmin 1 [Source:HGNC Symbol;Acc:HGNC:6510]	233.072	0.229663	0.107157	2.14323	0.0320943	0.186645	Non-sig.
38	6412	ENSG00000131153.9	GINS2	GINS complex subunit 2 [Source:HGNC Symbol;Acc:HGNC:24575]	12.7788	0.855584	0.401212	2.1325	0.0329659	0.190029	Non-sig.
39	7091	ENSG00000135476.12	ESPL1	extra spindle pole bodies like 1, separase [Source:HGNC Symbol;Acc:HGNC:16856]	3.70493	2.13385	1.01659	2.09903	0.0358142	0.199948	Non-sig.
40	1901	ENSG00000090889.12	KIF4A	kinesin family member 4A [Source:HGNC Symbol;Acc:HGNC:13339]	11.7149	0.984533	0.473038	2.0813	0.0374066	0.205687	Non-sig.
41	4103	ENSG00000112742.10	TTK	TTK protein kinase [Source:HGNC Symbol;Acc:HGNC:12401]	12.8405	1.33224	0.640114	2.08126	0.0374104	0.205687	Non-sig.
42	2333	ENSG00000100526.20	CDKN3		28.01	0.810891	0.397037	2.04236	0.0411159	0.217544	Non-sig.
43	3535	ENSG00000108468.15	CBX1	chromobox 1 [Source:HGNC Symbol;Acc:HGNC:1551]	401.355	0.188149	0.0921973	2.04072	0.0412786	0.218276	Non-sig.
44	4770	ENSG00000118007.13	STAG1	stromal antigen 1 [Source:HGNC Symbol;Acc:HGNC:11354]	250.852	0.215865	0.106517	2.02658	0.0427051	0.222675	Non-sig.
45	1305	ENSG00000075391.17	RASAL2		123.976	0.332542	0.166344	1.99912	0.045595	0.230941	Non-sig.
46	7340	ENSG00000136824.19	SMC2	structural maintenance of chromosomes 2 [Source:HGNC Symbol;Acc:HGNC:14011]	543.687	-0.287758	0.144296	-1.99422	0.0461281	0.232851	Non-sig.
47	10186	ENSG00000158169.13	FANCC		49.1817	-0.604125	0.307528	-1.96445	0.0494774	0.243184	Non-sig.
48	4124	ENSG00000112941.14	TENT4A	terminal nucleotidyltransferase 4A [Source:HGNC Symbol;Acc:HGNC:16705]	77.4981	0.325443	0.166091	1.95943	0.0500629	0.245315	Non-sig.
49	4805	ENSG00000118412.13	CASP8AP2	caspase 8 associated protein 2 [Source:HGNC Symbol;Acc:HGNC:1510]	198.989	-0.18456	0.096041	-1.92168	0.0546464	0.257693	Non-sig.
50	7480	ENSG00000137497.18	NUMA1		538.885	-0.232037	0.122845	-1.88886	0.0589102	0.27109	Non-sig.
51	6863	ENSG00000134250.20	NOTCH2		329.285	0.274712	0.150071	1.83054	0.0671685	0.292769	Non-sig.
52	7084	ENSG00000135451.13	TROAP	trophinin associated protein [Source:HGNC Symbol;Acc:HGNC:12327]	5.71075	1.60593	0.877971	1.82913	0.0673794	0.292975	Non-sig.
53	8330	ENSG00000143179.16	UCK2	uridine-cytidine kinase 2 [Source:HGNC Symbol;Acc:HGNC:12562]	92.5923	0.252089	0.138961	1.8141	0.0696621	0.29791	Non-sig.
54	9227	ENSG00000149554.14	CHEK1	checkpoint kinase 1 [Source:HGNC Symbol;Acc:HGNC:1925]	15.9546	0.778952	0.432114	1.80265	0.0714425	0.301777	Non-sig.
55	6656	ENSG00000132780.17	NASP	nuclear autoantigenic sperm protein [Source:HGNC Symbol;Acc:HGNC:7644]	337.848	0.176094	0.0990798	1.7773	0.0755191	0.31136	Non-sig.
56	54259	ENSG00000277443.3	MARCKS	myristoylated alanine rich protein kinase C substrate [Source:HGNC Symbol;Acc:HGNC:6759]	326.377	0.438939	0.251565	1.74483	0.081014	0.324382	Non-sig.
57	75	ENSG00000005007.13	UPF1	UPF1 RNA helicase and ATPase [Source:HGNC Symbol;Acc:HGNC:9962]	422.591	-0.152028	0.0897841	-1.69326	0.0904066	0.345536	Non-sig.
58	12344	ENSG00000168393.13	DTYMK	deoxythymidylate kinase [Source:HGNC Symbol;Acc:HGNC:3061]	92.6552	0.176636	0.106436	1.65955	0.097005	0.35739	Non-sig.
59	15707	ENSG00000184349.14	EFNA5	ephrin A5 [Source:HGNC Symbol;Acc:HGNC:3225]	530.963	-0.144207	0.0868988	-1.65948	0.0970191	0.35739	Non-sig.
60	7082	ENSG00000135446.17	CDK4	cyclin dependent kinase 4 [Source:HGNC Symbol;Acc:HGNC:1773]	344.785	0.16221	0.0996323	1.62809	0.103507	0.371727	Non-sig.
61	708	ENSG00000053254.16	FOXN3	forkhead box N3 [Source:HGNC Symbol;Acc:HGNC:1928]	1030.19	0.208658	0.130089	1.60396	0.108724	0.381886	Non-sig.
62	4175	ENSG00000113368.12	LMNB1	lamin B1 [Source:HGNC Symbol;Acc:HGNC:6637]	24.3835	-0.484681	0.303233	-1.59838	0.109959	0.384876	Non-sig.
63	8304	ENSG00000143033.18	MTF2	metal response element binding transcription factor 2 [Source:HGNC Symbol;Acc:HGNC:29535]	152.078	-0.199124	0.12543	-1.58753	0.112392	0.389426	Non-sig.
64	11245	ENSG00000164109.14	MAD2L1	mitotic arrest deficient 2 like 1 [Source:HGNC Symbol;Acc:HGNC:6763]	17.0869	0.646778	0.407463	1.58733	0.112438	0.389434	Non-sig.
65	35083	ENSG00000239306.5	RBM14	RNA binding motif protein 14 [Source:HGNC Symbol;Acc:HGNC:14219]	146.757	0.365746	0.232427	1.57359	0.115581	0.395276	Non-sig.
66	12643	ENSG00000169679.15	BUB1	BUB1 mitotic checkpoint serine/threonine kinase [Source:HGNC Symbol;Acc:HGNC:1148]	7.51533	-0.906012	0.57742	-1.56907	0.116632	0.397277	Non-sig.
67	20134	ENSG00000205250.9	E2F4	E2F transcription factor 4 [Source:HGNC Symbol;Acc:HGNC:3118]	89.8627	0.191664	0.122194	1.56852	0.11676	0.397409	Non-sig.
68	148	ENSG00000006634.8	DBF4	DBF4 zinc finger [Source:HGNC Symbol;Acc:HGNC:17364]	65.3626	-0.340498	0.218393	-1.5591	0.118972	0.401883	Non-sig.
69	10607	ENSG00000161547.17	SRSF2	serine and arginine rich splicing factor 2 [Source:HGNC Symbol;Acc:HGNC:10783]	327.292	-0.153185	0.0992812	-1.54294	0.122846	0.40857	Non-sig.
70	2736	ENSG00000102974.16	CTCF	CCCTC-binding factor [Source:HGNC Symbol;Acc:HGNC:13723]	258.707	-0.188162	0.123233	-1.52687	0.126793	0.415375	Non-sig.
71	529	ENSG00000036257.13	CUL3		222.587	0.260011	0.170529	1.52473	0.127326	0.416361	Non-sig.
72	7945	ENSG00000140332.17	TLE3		160.092	0.263642	0.175773	1.4999	0.133641	0.426306	Non-sig.
73	5347	ENSG00000123136.15	DDX39A	DExD-box helicase 39A [Source:HGNC Symbol;Acc:HGNC:17821]	114.098	0.254625	0.170212	1.49593	0.134671	0.427804	Non-sig.
74	3692	ENSG00000109685.19	NSD2	nuclear receptor binding SET domain protein 2 [Source:HGNC Symbol;Acc:HGNC:12766]	199.501	0.207742	0.144832	1.43437	0.151467	0.454932	Non-sig.
75	12275	ENSG00000168078.10	PBK	PDZ binding kinase [Source:HGNC Symbol;Acc:HGNC:18282]	5.51948	0.878384	0.612405	1.43432	0.151482	0.454932	Non-sig.
76	1333	ENSG00000076003.5	MCM6	minichromosome maintenance complex component 6 [Source:HGNC Symbol;Acc:HGNC:6949]	87.5862	0.266572	0.186037	1.4329	0.151887	0.455662	Non-sig.
77	9216	ENSG00000149503.13	INCENP	inner centromere protein [Source:HGNC Symbol;Acc:HGNC:6058]	47.5462	0.212796	0.154115	1.38076	0.167351	0.477651	Non-sig.
78	4754	ENSG00000117724.13	CENPF		110.903	0.431565	0.313445	1.37685	0.16856	0.479496	Non-sig.
79	4358	ENSG00000115053.17	NCL	nucleolin [Source:HGNC Symbol;Acc:HGNC:7667]	2767.39	-0.105316	0.0771503	-1.36508	0.172227	0.484237	Non-sig.
80	5434	ENSG00000123975.5	CKS2	CDC28 protein kinase regulatory subunit 2 [Source:HGNC Symbol;Acc:HGNC:2000]	30.9007	0.377132	0.277559	1.35875	0.174227	0.486775	Non-sig.
81	3803	ENSG00000110713.17	NUP98	nucleoporin 98 and 96 precursor [Source:HGNC Symbol;Acc:HGNC:8068]	71.4533	-0.352396	0.262457	-1.34268	0.179375	0.492917	Non-sig.
82	6413	ENSG00000131165.16	CHMP1A	charged multivesicular body protein 1A [Source:HGNC Symbol;Acc:HGNC:8740]	159.461	0.172703	0.128851	1.34034	0.180136	0.493685	Non-sig.
83	6839	ENSG00000134138.20	MEIS2	Meis homeobox 2 [Source:HGNC Symbol;Acc:HGNC:7001]	21.9786	0.472807	0.355783	1.32892	0.183874	0.498892	Non-sig.
84	2938	ENSG00000104549.12	SQLE	squalene epoxidase [Source:HGNC Symbol;Acc:HGNC:11279]	227.319	0.151588	0.115505	1.3124	0.189385	0.50629	Non-sig.
85	10101	ENSG00000157456.8	CCNB2	cyclin B2 [Source:HGNC Symbol;Acc:HGNC:1580]	7.36146	0.838827	0.650692	1.28913	0.197353	0.516224	Non-sig.
86	11805	ENSG00000166266.14	CUL5	cullin 5 [Source:HGNC Symbol;Acc:HGNC:2556]	327.021	0.140362	0.109964	1.27644	0.2018	0.522024	Non-sig.
87	6490	ENSG00000131747.15	TOP2A	DNA topoisomerase II alpha [Source:HGNC Symbol;Acc:HGNC:11989]	190.958	0.541946	0.433771	1.24938	0.211526	0.532307	Non-sig.
88	11134	ENSG00000163808.17	KIF15	kinesin family member 15 [Source:HGNC Symbol;Acc:HGNC:17273]	10.0586	0.684513	0.558266	1.22614	0.220146	0.543985	Non-sig.
89	9629	ENSG00000153187.20	HNRNPU	heterogeneous nuclear ribonucleoprotein U [Source:HGNC Symbol;Acc:HGNC:5048]	1311.86	0.141252	0.115921	1.21851	0.223029	0.548105	Non-sig.
90	7278	ENSG00000136450.13	SRSF1	serine and arginine rich splicing factor 1 [Source:HGNC Symbol;Acc:HGNC:10780]	222.696	-0.152695	0.130648	-1.16875	0.242505	0.569907	Non-sig.
91	2521	ENSG00000101412.13	E2F1	E2F transcription factor 1 [Source:HGNC Symbol;Acc:HGNC:3113]	8.34142	0.654439	0.568121	1.15194	0.249347	0.577277	Non-sig.
92	5395	ENSG00000123505.19	AMD1	adenosylmethionine decarboxylase 1 [Source:HGNC Symbol;Acc:HGNC:457]	774.854	-0.132677	0.115852	-1.14523	0.252114	0.58031	Non-sig.
93	3227	ENSG00000105968.19	H2AZ2	H2A.Z variant histone 2 [Source:HGNC Symbol;Acc:HGNC:20664]	578.203	-0.0773927	0.0688165	-1.12462	0.260748	0.590392	Non-sig.
94	16725	ENSG00000188529.15	SRSF10	serine and arginine rich splicing factor 10 [Source:HGNC Symbol;Acc:HGNC:16713]	515.331	-0.137366	0.122561	-1.1208	0.262371	0.591955	Non-sig.
95	14212	ENSG00000177084.18	POLE	DNA polymerase epsilon, catalytic subunit [Source:HGNC Symbol;Acc:HGNC:9177]	56.307	-0.212265	0.196566	-1.07987	0.280201	0.612598	Non-sig.
96	1939	ENSG00000091651.9	ORC6	origin recognition complex subunit 6 [Source:HGNC Symbol;Acc:HGNC:17151]	15.3009	0.431206	0.400571	1.07648	0.281713	0.614329	Non-sig.
97	12787	ENSG00000170312.16	CDK1		30.7484	0.697638	0.656914	1.06199	0.288238	0.621374	Non-sig.
98	1993	ENSG00000093000.19	NUP50	nucleoporin 50 [Source:HGNC Symbol;Acc:HGNC:8065]	234.051	0.123198	0.116865	1.05419	0.291794	0.624362	Non-sig.
99	7650	ENSG00000138376.11	BARD1	BRCA1 associated RING domain 1 [Source:HGNC Symbol;Acc:HGNC:952]	73.2448	0.280429	0.267605	1.04792	0.294675	0.626648	Non-sig.
100	7628	ENSG00000138182.15	KIF20B	kinesin family member 20B [Source:HGNC Symbol;Acc:HGNC:7212]	113.019	0.210057	0.205201	1.02366	0.305995	0.638421	Non-sig.
101	1771	ENSG00000088325.16	TPX2	TPX2 microtubule nucleation factor [Source:HGNC Symbol;Acc:HGNC:1249]	27.756	0.317324	0.310227	1.02288	0.306366	0.638917	Non-sig.
102	7621	ENSG00000138160.7	KIF11	kinesin family member 11 [Source:HGNC Symbol;Acc:HGNC:6388]	12.6502	0.397798	0.38988	1.02031	0.307582	0.639963	Non-sig.
103	4102	ENSG00000112739.17	PRPF4B	pre-mRNA processing factor 4B [Source:HGNC Symbol;Acc:HGNC:17346]	955.076	-0.0981871	0.099326	-0.988533	0.322892	0.652988	Non-sig.
104	3989	ENSG00000112029.10	FBXO5	F-box protein 5 [Source:HGNC Symbol;Acc:HGNC:13584]	17.7866	-0.273489	0.277959	-0.983922	0.325154	0.655019	Non-sig.
105	8276	ENSG00000142731.11	PLK4	polo like kinase 4 [Source:HGNC Symbol;Acc:HGNC:11397]	3.82522	0.904311	0.919379	0.983611	0.325307	0.655019	Non-sig.
106	11584	ENSG00000165392.11	WRN	WRN RecQ like helicase [Source:HGNC Symbol;Acc:HGNC:12791]	182.025	-0.132257	0.136344	-0.970028	0.332033	0.661654	Non-sig.
107	84	ENSG00000005156.12	LIG3	DNA ligase 3 [Source:HGNC Symbol;Acc:HGNC:6600]	127.459	-0.204029	0.211338	-0.965417	0.334336	0.663912	Non-sig.
108	1602	ENSG00000083642.19	PDS5B	PDS5 cohesin associated factor B [Source:HGNC Symbol;Acc:HGNC:20418]	339.344	-0.120983	0.125711	-0.962389	0.335854	0.664792	Non-sig.
109	3726	ENSG00000109971.14	HSPA8	heat shock protein family A (Hsp70) member 8 [Source:HGNC Symbol;Acc:HGNC:5241]	2524.8	0.0614446	0.0638728	0.961983	0.336058	0.664792	Non-sig.
110	8093	ENSG00000141380.14	SS18	SS18 subunit of BAF chromatin remodeling complex [Source:HGNC Symbol;Acc:HGNC:11340]	238.891	0.10806	0.11285	0.95756	0.338285	0.666888	Non-sig.
111	693	ENSG00000051341.15	POLQ	DNA polymerase theta [Source:HGNC Symbol;Acc:HGNC:9186]	22.1065	-0.711773	0.745576	-0.954662	0.339749	0.668524	Non-sig.
112	7538	ENSG00000137812.20	KNL1		22.3656	0.657133	0.691616	0.950141	0.342041	0.670722	Non-sig.
113	4747	ENSG00000117650.13	NEK2	NIMA related kinase 2 [Source:HGNC Symbol;Acc:HGNC:7745]	3.91766	0.961771	1.02215	0.940929	0.346741	0.67578	Non-sig.
114	13519	ENSG00000173473.11	SMARCC1	SWI/SNF related, matrix associated, actin dependent regulator of chromatin subfamily c member 1 [Source:HGNC Symbol;Acc:HGNC:11104]	481.716	0.0827472	0.0884701	0.935313	0.349627	0.6782	Non-sig.
115	8766	ENSG00000145907.16	G3BP1	G3BP stress granule assembly factor 1 [Source:HGNC Symbol;Acc:HGNC:30292]	475.05	0.17847	0.195088	0.914819	0.360286	0.686116	Non-sig.
116	11951	ENSG00000166851.15	PLK1	polo like kinase 1 [Source:HGNC Symbol;Acc:HGNC:9077]	11.5081	0.426652	0.468475	0.910725	0.36244	0.687528	Non-sig.
117	11210	ENSG00000164045.12	CDC25A	cell division cycle 25A [Source:HGNC Symbol;Acc:HGNC:1725]	14.0732	0.287214	0.323421	0.88805	0.374514	0.698848	Non-sig.
118	12013	ENSG00000167088.11	SNRPD1	small nuclear ribonucleoprotein D1 polypeptide [Source:HGNC Symbol;Acc:HGNC:11158]	450.776	0.0967456	0.110807	0.8731	0.382609	0.704712	Non-sig.
119	1194	ENSG00000072501.19	SMC1A	structural maintenance of chromosomes 1A [Source:HGNC Symbol;Acc:HGNC:11111]	693.94	-0.0906659	0.106477	-0.851509	0.394486	0.714297	Non-sig.
120	3527	ENSG00000108424.11	KPNB1	karyopherin subunit beta 1 [Source:HGNC Symbol;Acc:HGNC:6400]	2110.45	-0.0645856	0.0764418	-0.844899	0.398167	0.716546	Non-sig.
121	12523	ENSG00000169136.12	ATF5		120.075	0.128952	0.152528	0.845434	0.397869	0.716546	Non-sig.
122	170	ENSG00000007168.14	PAFAH1B1	platelet activating factor acetylhydrolase 1b regulatory subunit 1 [Source:HGNC Symbol;Acc:HGNC:8574]	344.268	-0.154152	0.192983	-0.798785	0.424415	0.735462	Non-sig.
123	8805	ENSG00000146143.19	PRIM2	DNA primase subunit 2 [Source:HGNC Symbol;Acc:HGNC:9370]	23.8703	-0.239472	0.301014	-0.795551	0.426293	0.737174	Non-sig.
124	14585	ENSG00000178999.13	AURKB	aurora kinase B [Source:HGNC Symbol;Acc:HGNC:11390]	11.3904	0.572733	0.733351	0.780981	0.434814	0.744433	Non-sig.
125	1616	ENSG00000083896.13	YTHDC1	YTH domain containing 1 [Source:HGNC Symbol;Acc:HGNC:30626]	695.809	0.271592	0.355102	0.76483	0.444373	0.751219	Non-sig.
126	7293	ENSG00000136527.18	TRA2B		511.44	0.0710904	0.0958173	0.741937	0.458126	0.76169	Non-sig.
127	11389	ENSG00000164611.13	PTTG1	PTTG1 regulator of sister chromatid separation, securin [Source:HGNC Symbol;Acc:HGNC:9690]	72.129	0.188453	0.254379	0.740838	0.458791	0.762453	Non-sig.
128	69	ENSG00000004897.12	CDC27	cell division cycle 27 [Source:HGNC Symbol;Acc:HGNC:1728]	313.019	-0.0510649	0.0690162	-0.739897	0.459363	0.76271	Non-sig.
129	16894	ENSG00000189159.16	JPT1	Jupiter microtubule associated homolog 1 [Source:HGNC Symbol;Acc:HGNC:14569]	191.586	0.105413	0.15013	0.702146	0.482588	0.778242	Non-sig.
130	8469	ENSG00000143815.15	LBR	lamin B receptor [Source:HGNC Symbol;Acc:HGNC:6518]	72.5326	0.135658	0.195247	0.694801	0.48718	0.780943	Non-sig.
131	15618	ENSG00000183955.13	KMT5A		202.074	-0.0804842	0.118977	-0.676469	0.498743	0.788473	Non-sig.
132	12156	ENSG00000167670.16	CHAF1A	chromatin assembly factor 1 subunit A [Source:HGNC Symbol;Acc:HGNC:1910]	55.6321	-0.178693	0.266382	-0.670816	0.502338	0.790239	Non-sig.
133	8500	ENSG00000143995.20	MEIS1	Meis homeobox 1 [Source:HGNC Symbol;Acc:HGNC:7000]	14.3059	0.431976	0.65401	0.660503	0.508931	0.794265	Non-sig.
134	2384	ENSG00000100784.12	RPS6KA5	ribosomal protein S6 kinase A5 [Source:HGNC Symbol;Acc:HGNC:10434]	132.823	-0.130049	0.198766	-0.654283	0.512929	0.796546	Non-sig.
135	3138	ENSG00000105576.16	TNPO2	transportin 2 [Source:HGNC Symbol;Acc:HGNC:19998]	411.201	-0.0656225	0.103375	-0.6348	0.525559	0.805138	Non-sig.
136	17886	ENSG00000198830.11	HMGN2	high mobility group nucleosomal binding domain 2 [Source:HGNC Symbol;Acc:HGNC:4986]	1254.03	0.0510462	0.0845896	0.603458	0.546204	0.816496	Non-sig.
137	1197	ENSG00000072571.20	HMMR	hyaluronan mediated motility receptor [Source:HGNC Symbol;Acc:HGNC:5012]	7.7111	0.384065	0.638063	0.601923	0.547225	0.817278	Non-sig.
138	11432	ENSG00000164754.15	RAD21		692.681	-0.0465792	0.0773801	-0.601954	0.547205	0.817278	Non-sig.
139	2184	ENSG00000100084.14	HIRA	histone cell cycle regulator [Source:HGNC Symbol;Acc:HGNC:4916]	9.37854	-0.288548	0.480516	-0.600497	0.548175	0.817348	Non-sig.
140	1472	ENSG00000079616.13	KIF22		98.2806	-0.0875329	0.146984	-0.595529	0.55149	0.819537	Non-sig.
141	5391	ENSG00000123473.17	STIL	STIL centriolar assembly protein [Source:HGNC Symbol;Acc:HGNC:10879]	15.6543	0.214676	0.37307	0.57543	0.565	0.825863	Non-sig.
142	6133	ENSG00000129351.17	ILF3	interleukin enhancer binding factor 3 [Source:HGNC Symbol;Acc:HGNC:6038]	614.675	-0.045155	0.079073	-0.571055	0.567963	0.827757	Non-sig.
143	2432	ENSG00000101057.16	MYBL2	MYB proto-oncogene like 2 [Source:HGNC Symbol;Acc:HGNC:7548]	7.89978	0.347684	0.626818	0.554681	0.579113	0.833512	Non-sig.
144	198	ENSG00000007968.7	E2F2	E2F transcription factor 2 [Source:HGNC Symbol;Acc:HGNC:3114]	6.3351	0.372587	0.682737	0.545725	0.585255	0.837287	Non-sig.
145	11242	ENSG00000164105.4	SAP30	Sin3A associated protein 30 [Source:HGNC Symbol;Acc:HGNC:10532]	142.667	-0.0744808	0.137366	-0.542205	0.587677	0.838643	Non-sig.
146	346	ENSG00000013810.21	TACC3	transforming acidic coiled-coil containing protein 3 [Source:HGNC Symbol;Acc:HGNC:11524]	28.9499	0.127382	0.238715	0.533613	0.593609	0.840668	Non-sig.
147	4755	ENSG00000117748.10	RPA2	replication protein A2 [Source:HGNC Symbol;Acc:HGNC:10290]	200.48	0.0535622	0.101236	0.529082	0.596749	0.842154	Non-sig.
148	4232	ENSG00000113810.16	SMC4	structural maintenance of chromosomes 4 [Source:HGNC Symbol;Acc:HGNC:14013]	186.227	-0.071581	0.137273	-0.521449	0.602054	0.845255	Non-sig.
149	1517	ENSG00000080986.13	NDC80	NDC80 kinetochore complex component [Source:HGNC Symbol;Acc:HGNC:16909]	7.19775	0.373999	0.728181	0.513608	0.607526	0.847282	Non-sig.
150	17957	ENSG00000198947.18	DMD	dystrophin [Source:HGNC Symbol;Acc:HGNC:2928]	27.8613	-0.219804	0.449755	-0.48872	0.62504	0.855434	Non-sig.
151	2804	ENSG00000103342.13	GSPT1	G1 to S phase transition 1 [Source:HGNC Symbol;Acc:HGNC:4621]	748.061	-0.0613231	0.129049	-0.475191	0.634651	0.860596	Non-sig.
152	2597	ENSG00000101945.17	SUV39H1	SUV39H1 histone lysine methyltransferase [Source:HGNC Symbol;Acc:HGNC:11479]	12.9303	0.147499	0.329265	0.447963	0.65418	0.869342	Non-sig.
153	16285	ENSG00000186625.14	KATNA1	katanin catalytic subunit A1 [Source:HGNC Symbol;Acc:HGNC:6216]	91.4289	0.0676692	0.154901	0.436856	0.662216	0.872706	Non-sig.
154	16712	ENSG00000188486.3	H2AX		59.3053	-0.0609394	0.139921	-0.435528	0.663179	0.873535	Non-sig.
155	9767	ENSG00000154473.18	BUB3	BUB3 mitotic checkpoint protein [Source:HGNC Symbol;Acc:HGNC:1151]	319.525	-0.0373138	0.0877185	-0.425381	0.670559	0.876749	Non-sig.
156	15249	ENSG00000182481.10	KPNA2	karyopherin subunit alpha 2 [Source:HGNC Symbol;Acc:HGNC:6395]	219.765	0.0475714	0.120112	0.396057	0.692063	0.885294	Non-sig.
157	8294	ENSG00000142945.13	KIF2C	kinesin family member 2C [Source:HGNC Symbol;Acc:HGNC:6393]	17.0829	0.201099	0.522244	0.385067	0.700187	0.888946	Non-sig.
158	3493	ENSG00000108106.14	UBE2S	ubiquitin conjugating enzyme E2 S [Source:HGNC Symbol;Acc:HGNC:17895]	161.027	0.0642744	0.16818	0.382177	0.70233	0.890271	Non-sig.
159	1927	ENSG00000091436.17	MAP3K20	mitogen-activated protein kinase kinase kinase 20 [Source:HGNC Symbol;Acc:HGNC:17797]	821.785	0.0354413	0.0952265	0.372178	0.70976	0.893122	Non-sig.
160	7253	ENSG00000136273.13	HUS1	HUS1 checkpoint clamp component [Source:HGNC Symbol;Acc:HGNC:5309]	57.5008	0.0640119	0.17226	0.3716	0.710191	0.893529	Non-sig.
161	4886	ENSG00000119318.13	RAD23B	RAD23 homolog B, nucleotide excision repair protein [Source:HGNC Symbol;Acc:HGNC:9813]	386.054	0.0446664	0.124596	0.35849	0.719976	0.897715	Non-sig.
162	12887	ENSG00000170759.11	KIF5B	kinesin family member 5B [Source:HGNC Symbol;Acc:HGNC:6324]	1148.51	-0.030348	0.0864492	-0.35105	0.725551	0.901038	Non-sig.
163	402	ENSG00000020426.11	MNAT1	MNAT1 component of CDK activating kinase [Source:HGNC Symbol;Acc:HGNC:7181]	85.9539	-0.0603197	0.189092	-0.318997	0.749729	0.912204	Non-sig.
164	5336	ENSG00000123080.12	CDKN2C	cyclin dependent kinase inhibitor 2C [Source:HGNC Symbol;Acc:HGNC:1789]	22.2281	0.0859991	0.311227	0.276323	0.7823	0.925069	Non-sig.
165	15360	ENSG00000182944.18	EWSR1	EWS RNA binding protein 1 [Source:HGNC Symbol;Acc:HGNC:3508]	344.356	0.0246969	0.08981	0.27499	0.783324	0.925539	Non-sig.
166	4581	ENSG00000116560.11	SFPQ		1456.51	-0.0227734	0.084046	-0.270963	0.786419	0.926934	Non-sig.
167	11442	ENSG00000164815.11	ORC5	origin recognition complex subunit 5 [Source:HGNC Symbol;Acc:HGNC:8491]	37.4266	-0.0521234	0.198914	-0.262039	0.793291	0.929285	Non-sig.
168	8693	ENSG00000145386.11	CCNA2	cyclin A2 [Source:HGNC Symbol;Acc:HGNC:1578]	9.51209	0.106203	0.413607	0.256772	0.797355	0.930662	Non-sig.
169	6354	ENSG00000130826.18	DKC1		886.033	-0.0275502	0.108221	-0.254575	0.799052	0.931494	Non-sig.
170	10633	ENSG00000161800.13	RACGAP1	Rac GTPase activating protein 1 [Source:HGNC Symbol;Acc:HGNC:9804]	16.1107	-0.0828074	0.342499	-0.241774	0.808955	0.934494	Non-sig.
171	17931	ENSG00000198901.14	PRC1	protein regulator of cytokinesis 1 [Source:HGNC Symbol;Acc:HGNC:9341]	76.8597	0.0771018	0.31865	0.241964	0.808808	0.934494	Non-sig.
172	745	ENSG00000055130.17	CUL1		296.618	0.0188785	0.078563	0.240297	0.8101	0.934971	Non-sig.
173	1220	ENSG00000073111.14	MCM2	minichromosome maintenance complex component 2 [Source:HGNC Symbol;Acc:HGNC:6944]	38.769	-0.0532523	0.228232	-0.233325	0.815509	0.937048	Non-sig.
174	2320	ENSG00000100462.16	PRMT5	protein arginine methyltransferase 5 [Source:HGNC Symbol;Acc:HGNC:10894]	269.416	0.0195262	0.0979682	0.199311	0.842019	0.947093	Non-sig.
175	7885	ENSG00000139842.15	CUL4A	cullin 4A [Source:HGNC Symbol;Acc:HGNC:2554]	286.516	0.0257313	0.132854	0.193682	0.846425	0.948817	Non-sig.
176	7847	ENSG00000139618.17	BRCA2	BRCA2 DNA repair associated [Source:HGNC Symbol;Acc:HGNC:1101]	58.2817	0.0483001	0.273866	0.176364	0.860008	0.95438	Non-sig.
177	15899	ENSG00000185129.8	PURA	purine rich element binding protein A [Source:HGNC Symbol;Acc:HGNC:9701]	1354.56	0.011746	0.0669263	0.175507	0.860681	0.954536	Non-sig.
178	4005	ENSG00000112118.20	MCM3	minichromosome maintenance complex component 3 [Source:HGNC Symbol;Acc:HGNC:6945]	176.979	0.0214141	0.128555	0.166576	0.867704	0.956637	Non-sig.
179	11786	ENSG00000166197.17	NOLC1	nucleolar and coiled-body phosphoprotein 1 [Source:HGNC Symbol;Acc:HGNC:15608]	342.236	-0.0185733	0.11414	-0.162724	0.870736	0.957573	Non-sig.
180	7336	ENSG00000136811.16	ODF2		101.596	-0.0273341	0.170919	-0.159925	0.872941	0.957812	Non-sig.
181	6130	ENSG00000129315.11	CCNT1	cyclin T1 [Source:HGNC Symbol;Acc:HGNC:1599]	221.073	0.016613	0.119916	0.138539	0.889815	0.962935	Non-sig.
182	348	ENSG00000014138.9	POLA2	DNA polymerase alpha 2, accessory subunit [Source:HGNC Symbol;Acc:HGNC:30073]	35.5497	0.0254414	0.193082	0.131764	0.895171	0.965297	Non-sig.
183	3996	ENSG00000112062.11	MAPK14	mitogen-activated protein kinase 14 [Source:HGNC Symbol;Acc:HGNC:6876]	155.06	0.0122107	0.0949355	0.128621	0.897658	0.966584	Non-sig.
184	2252	ENSG00000100297.16	MCM5	minichromosome maintenance complex component 5 [Source:HGNC Symbol;Acc:HGNC:6948]	46.7304	0.0261129	0.205629	0.12699	0.898948	0.967151	Non-sig.
185	17930	ENSG00000198900.7	TOP1	DNA topoisomerase I [Source:HGNC Symbol;Acc:HGNC:11986]	1241.94	-0.00781976	0.0620953	-0.125931	0.899786	0.967627	Non-sig.
186	2075	ENSG00000097046.13	CDC7	cell division cycle 7 [Source:HGNC Symbol;Acc:HGNC:1745]	16.6796	-0.039451	0.392994	-0.100386	0.920038	0.97544	Non-sig.
187	7047	ENSG00000135316.19	SYNCRIP	synaptotagmin binding cytoplasmic RNA interacting protein [Source:HGNC Symbol;Acc:HGNC:16918]	789.509	0.00688378	0.0956034	0.0720035	0.942599	0.982224	Non-sig.
188	1753	ENSG00000087586.18	AURKA	aurora kinase A [Source:HGNC Symbol;Acc:HGNC:11393]	27.5679	-0.0130208	0.274017	-0.0475182	0.9621	0.990807	Non-sig.
189	13457	ENSG00000173207.13	CKS1B	CDC28 protein kinase regulatory subunit 1B [Source:HGNC Symbol;Acc:HGNC:19083]	186.201	-0.00488395	0.109204	-0.0447231	0.964328	0.991409	Non-sig.
190	1994	ENSG00000093009.11	CDC45	cell division cycle 45 [Source:HGNC Symbol;Acc:HGNC:1739]	3.59291	-0.0369807	1.00717	-0.0367175	0.97071	0.993015	Non-sig.
191	7737	ENSG00000138778.13	CENPE		45.9618	0.0132556	0.492869	0.0268948	0.978544	0.994254	Non-sig.
192	4701	ENSG00000117399.14	CDC20	cell division cycle 20 [Source:HGNC Symbol;Acc:HGNC:1723]	15.0181	-0.00687903	0.55982	-0.0122879	0.990196	0.997552	Non-sig.
193	1512	ENSG00000080839.12	RBL1	RB transcriptional corepressor like 1 [Source:HGNC Symbol;Acc:HGNC:9893]	43.188	-0.00272205	0.365573	-0.00744598	0.994059	0.998511	Non-sig.

## Sheet: INFLAMMATORY_RESPONSE Endo
	V1	gene_id	gene_name	description	baseMean	log2FoldChange	lfcSE	stat	pvalue	padj	sig
1	3299	ENSG00000106366.9	SERPINE1	serpin family E member 1 [Source:HGNC Symbol;Acc:HGNC:8583]	1135.4	2.90334	0.175057	16.5851	8.93365e-62	1.60002e-57	Sig. genes
2	1216	ENSG00000073008.15	PVR	PVR cell adhesion molecule [Source:HGNC Symbol;Acc:HGNC:9705]	464.341	0.719525	0.114875	6.26354	3.76339e-10	4.88423e-08	Sig. genes
3	7831	ENSG00000139514.13	SLC7A1	solute carrier family 7 member 1 [Source:HGNC Symbol;Acc:HGNC:11057]	423.123	0.782038	0.131772	5.93479	2.94222e-09	3.09971e-07	Sig. genes
4	12682	ENSG00000169851.15	PCDH7		2742.08	-0.69285	0.118858	-5.8292	5.56935e-09	5.39173e-07	Sig. genes
5	30434	ENSG00000231925.12	TAPBP		890.948	-0.419934	0.0772248	-5.43781	5.3938e-08	4.05895e-06	Sig. genes
6	4136	ENSG00000113070.8	HBEGF	heparin binding EGF like growth factor [Source:HGNC Symbol;Acc:HGNC:3059]	221.985	1.04862	0.208603	5.02687	4.98561e-07	2.86193e-05	Sig. genes
7	12129	ENSG00000167601.12	AXL	AXL receptor tyrosine kinase [Source:HGNC Symbol;Acc:HGNC:905]	578.014	0.627835	0.125292	5.01097	5.41556e-07	3.04052e-05	Sig. genes
8	10741	ENSG00000162493.17	PDPN	podoplanin [Source:HGNC Symbol;Acc:HGNC:29602]	1414.5	0.661007	0.136139	4.85538	1.20156e-06	5.99443e-05	Sig. genes
9	6018	ENSG00000128342.5	LIF	LIF interleukin 6 family cytokine [Source:HGNC Symbol;Acc:HGNC:6596]	33.8547	1.46069	0.302089	4.83529	1.3295e-06	6.54159e-05	Sig. genes
10	14018	ENSG00000176170.14	SPHK1	sphingosine kinase 1 [Source:HGNC Symbol;Acc:HGNC:11240]	71.9734	1.04292	0.238222	4.37793	1.19812e-05	0.000448917	Sig. genes
11	10295	ENSG00000159128.15	IFNGR2		286.74	0.5968	0.136753	4.36406	1.27669e-05	0.000469518	Sig. genes
12	1425	ENSG00000078401.7	EDN1	endothelin 1 [Source:HGNC Symbol;Acc:HGNC:3176]	51.7858	1.21505	0.30025	4.04681	5.19211e-05	0.00158147	Sig. genes
13	7392	ENSG00000136997.21	MYC	MYC proto-oncogene, bHLH transcription factor [Source:HGNC Symbol;Acc:HGNC:7553]	28.1443	1.11059	0.280477	3.95965	7.50593e-05	0.00213045	Sig. genes
14	1409	ENSG00000078081.8	LAMP3	lysosomal associated membrane protein 3 [Source:HGNC Symbol;Acc:HGNC:14582]	47.7372	1.22923	0.319452	3.84793	0.000119122	0.00306971	Sig. genes
15	8952	ENSG00000147257.15	GPC3		26.808	1.10341	0.311189	3.54578	0.00039146	0.00774702	Sig. genes
16	12249	ENSG00000167995.17	BEST1	bestrophin 1 [Source:HGNC Symbol;Acc:HGNC:12703]	35.6591	0.747883	0.213859	3.49708	0.000470373	0.00892413	Sig. genes
17	10615	ENSG00000161638.11	ITGA5	integrin subunit alpha 5 [Source:HGNC Symbol;Acc:HGNC:6141]	69.2159	0.777503	0.225523	3.44756	0.000565678	0.010213	Sig. genes
18	769	ENSG00000057019.16	DCBLD2	discoidin, CUB and LCCL domain containing 2 [Source:HGNC Symbol;Acc:HGNC:24627]	287.417	0.587566	0.171511	3.42581	0.000612963	0.0109019	Sig. genes
19	10077	ENSG00000157227.14	MMP14	matrix metallopeptidase 14 [Source:HGNC Symbol;Acc:HGNC:7160]	644.283	0.470903	0.140511	3.35137	0.000804128	0.0134976	Sig. genes
20	44949	ENSG00000259207.9	ITGB3	integrin subunit beta 3 [Source:HGNC Symbol;Acc:HGNC:6156]	45.0309	1.09345	0.329169	3.32186	0.00089419	0.0145989	Sig. genes
21	4724	ENSG00000117525.14	F3	coagulation factor III, tissue factor [Source:HGNC Symbol;Acc:HGNC:3541]	40.1899	1.08341	0.327752	3.30558	0.00094781	0.0152518	Sig. genes
22	5287	ENSG00000122641.11	INHBA	inhibin subunit beta A [Source:HGNC Symbol;Acc:HGNC:6066]	304.249	0.786238	0.248132	3.16862	0.00153163	0.0222839	Sig. genes
23	2405	ENSG00000100906.11	NFKBIA	NFKB inhibitor alpha [Source:HGNC Symbol;Acc:HGNC:7797]	560.841	-0.267911	0.0878252	-3.0505	0.00228458	0.0302182	Sig. genes
24	15764	ENSG00000184588.18	PDE4B	phosphodiesterase 4B [Source:HGNC Symbol;Acc:HGNC:8781]	55.6596	-0.751567	0.246449	-3.04959	0.00229157	0.0302446	Sig. genes
25	1494	ENSG00000080493.18	SLC4A4	solute carrier family 4 member 4 [Source:HGNC Symbol;Acc:HGNC:11030]	1644.2	-0.472683	0.161651	-2.9241	0.00345451	0.0405589	Sig. genes
26	804	ENSG00000059728.11	MXD1	MAX dimerization protein 1 [Source:HGNC Symbol;Acc:HGNC:6761]	62.8945	0.696856	0.240583	2.89653	0.00377315	0.0433742	Sig. genes
27	8363	ENSG00000143333.7	RGS16	regulator of G protein signaling 16 [Source:HGNC Symbol;Acc:HGNC:9997]	195.43	-0.381814	0.133309	-2.86413	0.00418155	0.0467197	Sig. genes
28	16699	ENSG00000188404.10	SELL	selectin L [Source:HGNC Symbol;Acc:HGNC:10720]	8.7978	-1.51318	0.531214	-2.84852	0.00439225	0.048469	Sig. genes
29	10551	ENSG00000160932.11	LY6E	lymphocyte antigen 6 family member E [Source:HGNC Symbol;Acc:HGNC:6727]	204.829	-0.404426	0.143635	-2.81564	0.00486799	0.0522383	Non-sig.
30	15714	ENSG00000184371.14	CSF1	colony stimulating factor 1 [Source:HGNC Symbol;Acc:HGNC:2432]	74.2755	0.461446	0.166542	2.77074	0.00559287	0.058035	Non-sig.
31	2841	ENSG00000103569.10	AQP9	aquaporin 9 [Source:HGNC Symbol;Acc:HGNC:643]	4.97029	1.65159	0.598493	2.75958	0.00578761	0.0594201	Non-sig.
32	374	ENSG00000017260.20	ATP2C1	ATPase secretory pathway Ca2+ transporting 1 [Source:HGNC Symbol;Acc:HGNC:13211]	158.959	0.427427	0.155757	2.74418	0.00606623	0.0613503	Non-sig.
33	2365	ENSG00000100644.17	HIF1A	hypoxia inducible factor 1 subunit alpha [Source:HGNC Symbol;Acc:HGNC:4910]	767.299	-0.303999	0.11239	-2.70486	0.00683342	0.0666956	Non-sig.
34	3230	ENSG00000105976.16	MET	MET proto-oncogene, receptor tyrosine kinase [Source:HGNC Symbol;Acc:HGNC:7029]	594.234	0.41466	0.153813	2.69587	0.0070205	0.0676006	Non-sig.
35	5577	ENSG00000124762.14	CDKN1A	cyclin dependent kinase inhibitor 1A [Source:HGNC Symbol;Acc:HGNC:1784]	977.553	0.282036	0.107345	2.62736	0.00860493	0.0777962	Non-sig.
36	8717	ENSG00000145623.13	OSMR	oncostatin M receptor [Source:HGNC Symbol;Acc:HGNC:8507]	146.075	0.396156	0.153439	2.58184	0.00982747	0.0854832	Non-sig.
37	998	ENSG00000067082.15	KLF6	Kruppel like factor 6 [Source:HGNC Symbol;Acc:HGNC:2235]	238.883	0.483461	0.201332	2.40131	0.0163363	0.122499	Non-sig.
38	5419	ENSG00000123700.5	KCNJ2	potassium inwardly rectifying channel subfamily J member 2 [Source:HGNC Symbol;Acc:HGNC:6263]	9.63042	1.14113	0.481532	2.3698	0.0177978	0.129366	Non-sig.
39	12412	ENSG00000168685.15	IL7R	interleukin 7 receptor [Source:HGNC Symbol;Acc:HGNC:6024]	11.0238	1.27745	0.543263	2.35143	0.0187013	0.133271	Non-sig.
40	2897	ENSG00000104312.8	RIPK2	receptor interacting serine/threonine kinase 2 [Source:HGNC Symbol;Acc:HGNC:10020]	58.1979	0.55267	0.235265	2.34914	0.0188169	0.133537	Non-sig.
41	11502	ENSG00000165029.17	ABCA1	ATP binding cassette subfamily A member 1 [Source:HGNC Symbol;Acc:HGNC:29]	88.1009	0.508822	0.220786	2.30459	0.0211893	0.14375	Non-sig.
42	8818	ENSG00000146242.9	TPBG	trophoblast glycoprotein [Source:HGNC Symbol;Acc:HGNC:12004]	81.7124	0.415311	0.18233	2.27779	0.0227388	0.14936	Non-sig.
43	10452	ENSG00000160223.17	ICOSLG	inducible T cell costimulator ligand [Source:HGNC Symbol;Acc:HGNC:17087]	45.4514	0.867874	0.387269	2.24101	0.0250255	0.159208	Non-sig.
44	13428	ENSG00000173039.19	RELA		422.445	0.167148	0.0772856	2.16273	0.0305622	0.181188	Non-sig.
45	7329	ENSG00000136754.18	ABI1	abl interactor 1 [Source:HGNC Symbol;Acc:HGNC:11320]	109.701	0.399973	0.186156	2.1486	0.0316663	0.184737	Non-sig.
46	12946	ENSG00000170961.7	HAS2	hyaluronan synthase 2 [Source:HGNC Symbol;Acc:HGNC:4819]	116.423	-0.444203	0.209286	-2.12247	0.0337986	0.19272	Non-sig.
47	599	ENSG00000043462.13	LCP2	lymphocyte cytosolic protein 2 [Source:HGNC Symbol;Acc:HGNC:6529]	4.30553	1.15116	0.555491	2.07232	0.0382355	0.208602	Non-sig.
48	1289	ENSG00000075142.14	SRI	sorcin [Source:HGNC Symbol;Acc:HGNC:11292]	393.925	0.209002	0.102169	2.04564	0.0407919	0.216405	Non-sig.
49	1809	ENSG00000089041.17	P2RX7	purinergic receptor P2X 7 [Source:HGNC Symbol;Acc:HGNC:8537]	24.8496	0.610363	0.299454	2.03825	0.0415246	0.219164	Non-sig.
50	6316	ENSG00000130706.13	ADRM1	ADRM1 26S proteasome ubiquitin receptor [Source:HGNC Symbol;Acc:HGNC:15759]	397.732	0.262497	0.130922	2.00498	0.0449651	0.228721	Non-sig.
51	298	ENSG00000011422.12	PLAUR	plasminogen activator, urokinase receptor [Source:HGNC Symbol;Acc:HGNC:9053]	196.872	0.313323	0.156377	2.00364	0.0451086	0.229125	Non-sig.
52	5631	ENSG00000125347.15	IRF1	interferon regulatory factor 1 [Source:HGNC Symbol;Acc:HGNC:6116]	218.112	-0.278802	0.139863	-1.99339	0.0462192	0.233021	Non-sig.
53	17643	ENSG00000198121.14	LPAR1		66.06	0.448037	0.251426	1.78199	0.0747514	0.309191	Non-sig.
54	10344	ENSG00000159388.6	BTG2	BTG anti-proliferation factor 2 [Source:HGNC Symbol;Acc:HGNC:1131]	74.0083	-0.308371	0.1742	-1.77021	0.0766917	0.314097	Non-sig.
55	816	ENSG00000060558.4	GNA15	G protein subunit alpha 15 [Source:HGNC Symbol;Acc:HGNC:4383]	23.2004	0.817596	0.464106	1.76166	0.078127	0.316645	Non-sig.
56	2654	ENSG00000102265.12	TIMP1	TIMP metallopeptidase inhibitor 1 [Source:HGNC Symbol;Acc:HGNC:11820]	3953.77	0.185831	0.108865	1.70698	0.087825	0.340023	Non-sig.
57	12610	ENSG00000169508.7	GPR183	G protein-coupled receptor 183 [Source:HGNC Symbol;Acc:HGNC:3128]	6.24578	1.23655	0.74296	1.66435	0.096042	0.355443	Non-sig.
58	46	ENSG00000003989.18	SLC7A2	solute carrier family 7 member 2 [Source:HGNC Symbol;Acc:HGNC:11060]	14.2524	0.609296	0.368008	1.65566	0.0977909	0.359269	Non-sig.
59	3780	ENSG00000110436.13	SLC1A2	solute carrier family 1 member 2 [Source:HGNC Symbol;Acc:HGNC:10940]	19.3996	-0.871546	0.535129	-1.62867	0.103384	0.37136	Non-sig.
60	3326	ENSG00000106546.14	AHR	aryl hydrocarbon receptor [Source:HGNC Symbol;Acc:HGNC:348]	830.29	-0.220174	0.138348	-1.59145	0.111509	0.388092	Non-sig.
61	130	ENSG00000006210.7	CX3CL1	C-X3-C motif chemokine ligand 1 [Source:HGNC Symbol;Acc:HGNC:10647]	48.9705	0.399286	0.253374	1.57587	0.115055	0.394426	Non-sig.
62	5412	ENSG00000123610.5	TNFAIP6	TNF alpha induced protein 6 [Source:HGNC Symbol;Acc:HGNC:11898]	23.1047	0.556055	0.371854	1.49536	0.134821	0.428129	Non-sig.
63	1507	ENSG00000080815.19	PSEN1	presenilin 1 [Source:HGNC Symbol;Acc:HGNC:9508]	185.106	0.161294	0.110432	1.46058	0.144131	0.442853	Non-sig.
64	3202	ENSG00000105835.13	NAMPT	nicotinamide phosphoribosyltransferase [Source:HGNC Symbol;Acc:HGNC:30092]	1110.47	0.24123	0.166076	1.45253	0.146354	0.446922	Non-sig.
65	5688	ENSG00000125657.5	TNFSF9	TNF superfamily member 9 [Source:HGNC Symbol;Acc:HGNC:11939]	5.49705	0.846989	0.59713	1.41843	0.156065	0.461977	Non-sig.
66	7356	ENSG00000136868.11	SLC31A1	solute carrier family 31 member 1 [Source:HGNC Symbol;Acc:HGNC:11016]	326.836	0.16654	0.117516	1.41718	0.156431	0.462522	Non-sig.
67	9148	ENSG00000148926.10	ADM	adrenomedullin [Source:HGNC Symbol;Acc:HGNC:259]	1215	-0.170614	0.120893	-1.41128	0.158162	0.465059	Non-sig.
68	13802	ENSG00000175040.6	CHST2	carbohydrate sulfotransferase 2 [Source:HGNC Symbol;Acc:HGNC:1970]	13.5388	0.727607	0.522961	1.39132	0.164128	0.473236	Non-sig.
69	17062	ENSG00000196352.16	CD55		234.155	0.261019	0.18927	1.37909	0.167868	0.478288	Non-sig.
70	3768	ENSG00000110324.11	IL10RA		7.32555	0.909068	0.680991	1.33492	0.181902	0.495494	Non-sig.
71	17402	ENSG00000197405.8	C5AR1	complement C5a receptor 1 [Source:HGNC Symbol;Acc:HGNC:1338]	6.69949	0.87246	0.660899	1.32011	0.186798	0.502581	Non-sig.
72	13336	ENSG00000172575.12	RASGRP1		22.5567	0.378475	0.297473	1.2723	0.203266	0.523368	Non-sig.
73	7246	ENSG00000136244.12	IL6	interleukin 6 [Source:HGNC Symbol;Acc:HGNC:6018]	8.31593	-0.691496	0.54852	-1.26066	0.207433	0.528616	Non-sig.
74	4457	ENSG00000115594.12	IL1R1	interleukin 1 receptor type 1 [Source:HGNC Symbol;Acc:HGNC:5993]	53.1906	0.398427	0.316777	1.25775	0.208482	0.529408	Non-sig.
75	390	ENSG00000019169.11	MARCO	macrophage receptor with collagenous structure [Source:HGNC Symbol;Acc:HGNC:6895]	24.0607	0.638146	0.515011	1.23909	0.215311	0.537603	Non-sig.
76	3828	ENSG00000110911.17	SLC11A2	solute carrier family 11 member 2 [Source:HGNC Symbol;Acc:HGNC:10908]	364.234	0.121623	0.100116	1.21482	0.224435	0.54972	Non-sig.
77	5816	ENSG00000126353.3	CCR7	C-C motif chemokine receptor 7 [Source:HGNC Symbol;Acc:HGNC:1608]	3.85548	-0.921627	0.763181	-1.20761	0.227196	0.552488	Non-sig.
78	3575	ENSG00000108691.9	CCL2		353.761	-0.250518	0.207994	-1.20445	0.228416	0.554411	Non-sig.
79	10406	ENSG00000160013.9	PTGIR	prostaglandin I2 receptor [Source:HGNC Symbol;Acc:HGNC:9602]	13.1266	0.438554	0.373497	1.17418	0.240322	0.567608	Non-sig.
80	7020	ENSG00000135124.15	P2RX4		35.3614	0.281963	0.244089	1.15516	0.248024	0.57585	Non-sig.
81	1646	ENSG00000085117.12	CD82	CD82 molecule [Source:HGNC Symbol;Acc:HGNC:6210]	268.236	-0.195934	0.171517	-1.14236	0.253305	0.581479	Non-sig.
82	13635	ENSG00000174125.8	TLR1	toll like receptor 1 [Source:HGNC Symbol;Acc:HGNC:11847]	13.0268	0.445472	0.393436	1.13226	0.257525	0.586504	Non-sig.
83	16530	ENSG00000187764.12	SEMA4D	semaphorin 4D [Source:HGNC Symbol;Acc:HGNC:10732]	78.5918	-0.213435	0.190893	-1.11808	0.263531	0.593317	Non-sig.
84	3574	ENSG00000108688.11	CCL7	C-C motif chemokine ligand 7 [Source:HGNC Symbol;Acc:HGNC:10634]	7.82264	0.733033	0.661077	1.10885	0.267496	0.59766	Non-sig.
85	3658	ENSG00000109320.13	NFKB1	nuclear factor kappa B subunit 1 [Source:HGNC Symbol;Acc:HGNC:7794]	211.065	0.118077	0.111022	1.06355	0.287534	0.62045	Non-sig.
86	470	ENSG00000028137.19	TNFRSF1B	TNF receptor superfamily member 1B [Source:HGNC Symbol;Acc:HGNC:11917]	37.1061	-0.289663	0.27425	-1.0562	0.290876	0.623502	Non-sig.
87	7470	ENSG00000137462.9	TLR2	toll like receptor 2 [Source:HGNC Symbol;Acc:HGNC:11848]	77.7707	-0.208366	0.202614	-1.02839	0.303768	0.635792	Non-sig.
88	262	ENSG00000010327.10	STAB1	stabilin 1 [Source:HGNC Symbol;Acc:HGNC:18628]	21.3918	0.290591	0.295438	0.983594	0.325315	0.655019	Non-sig.
89	11534	ENSG00000165168.8	CYBB		14.2407	-0.446586	0.455838	-0.979702	0.327233	0.656763	Non-sig.
90	5640	ENSG00000125384.7	PTGER2	prostaglandin E receptor 2 [Source:HGNC Symbol;Acc:HGNC:9594]	116.001	0.291267	0.302212	0.963785	0.335154	0.664516	Non-sig.
91	11201	ENSG00000164023.14	SGMS2		58.2692	0.261224	0.271124	0.963487	0.335303	0.664516	Non-sig.
92	15992	ENSG00000185507.21	IRF7	interferon regulatory factor 7 [Source:HGNC Symbol;Acc:HGNC:6122]	48.4399	-0.18834	0.197726	-0.95253	0.340828	0.669398	Non-sig.
93	13912	ENSG00000175591.12	P2RY2	purinergic receptor P2Y2 [Source:HGNC Symbol;Acc:HGNC:8541]	12.3642	0.427074	0.461542	0.925321	0.354799	0.682188	Non-sig.
94	5202	ENSG00000121858.11	TNFSF10	TNF superfamily member 10 [Source:HGNC Symbol;Acc:HGNC:11925]	96.8164	-0.238115	0.258391	-0.921531	0.356773	0.683612	Non-sig.
95	16089	ENSG00000185885.17	IFITM1	interferon induced transmembrane protein 1 [Source:HGNC Symbol;Acc:HGNC:5412]	21.6242	0.370242	0.416885	0.888116	0.374479	0.698848	Non-sig.
96	2427	ENSG00000101017.14	CD40		44.8601	0.173279	0.198143	0.874512	0.381839	0.704274	Non-sig.
97	7097	ENSG00000135503.13	ACVR1B	activin A receptor type 1B [Source:HGNC Symbol;Acc:HGNC:172]	77.601	0.114315	0.131538	0.869062	0.384813	0.706629	Non-sig.
98	907	ENSG00000064989.13	CALCRL	calcitonin receptor like receptor [Source:HGNC Symbol;Acc:HGNC:16709]	15.4215	0.534367	0.621176	0.86025	0.389651	0.710296	Non-sig.
99	13721	ENSG00000174600.14	CMKLR1	chemerin chemokine-like receptor 1 [Source:HGNC Symbol;Acc:HGNC:2121]	23.1775	0.311363	0.368315	0.845371	0.397903	0.716546	Non-sig.
100	14216	ENSG00000177105.10	RHOG	ras homolog family member G [Source:HGNC Symbol;Acc:HGNC:672]	198.416	0.128646	0.152656	0.842722	0.399384	0.717003	Non-sig.
101	12825	ENSG00000170458.14	CD14		118.025	-0.144213	0.174434	-0.82675	0.408379	0.723764	Non-sig.
102	9334	ENSG00000150782.12	IL18	interleukin 18 [Source:HGNC Symbol;Acc:HGNC:5986]	20.3002	0.382709	0.488293	0.78377	0.433175	0.743336	Non-sig.
103	915	ENSG00000065135.12	GNAI3	G protein subunit alpha i3 [Source:HGNC Symbol;Acc:HGNC:4387]	309.942	0.0710816	0.096459	0.736909	0.461177	0.763392	Non-sig.
104	3511	ENSG00000108342.13	CSF3	colony stimulating factor 3 [Source:HGNC Symbol;Acc:HGNC:2438]	23.517	-0.400086	0.544575	-0.734677	0.462536	0.763822	Non-sig.
105	6243	ENSG00000130303.14	BST2	bone marrow stromal cell antigen 2 [Source:HGNC Symbol;Acc:HGNC:1119]	5.99535	0.327445	0.454861	0.719879	0.471599	0.770863	Non-sig.
106	8213	ENSG00000142227.11	EMP3	epithelial membrane protein 3 [Source:HGNC Symbol;Acc:HGNC:3335]	65.8243	0.118803	0.165842	0.71636	0.473769	0.772547	Non-sig.
107	6523	ENSG00000131979.20	GCH1	GTP cyclohydrolase 1 [Source:HGNC Symbol;Acc:HGNC:4193]	8.80769	-0.285614	0.412863	-0.691788	0.48907	0.781864	Non-sig.
108	6509	ENSG00000131871.15	SELENOS	selenoprotein S [Source:HGNC Symbol;Acc:HGNC:30396]	442.163	-0.0727585	0.10606	-0.686015	0.492703	0.784132	Non-sig.
109	5599	ENSG00000124875.10	CXCL6	C-X-C motif chemokine ligand 6 [Source:HGNC Symbol;Acc:HGNC:10643]	10.3798	-0.43156	0.634775	-0.679862	0.496592	0.787137	Non-sig.
110	15070	ENSG00000181634.8	TNFSF15	TNF superfamily member 15 [Source:HGNC Symbol;Acc:HGNC:11931]	6.88565	0.483968	0.716016	0.675917	0.499093	0.788701	Non-sig.
111	7355	ENSG00000136867.11	SLC31A2	solute carrier family 31 member 2 [Source:HGNC Symbol;Acc:HGNC:11017]	29.5841	-0.211255	0.317954	-0.66442	0.506421	0.793041	Non-sig.
112	3180	ENSG00000105711.14	SCN1B	sodium voltage-gated channel beta subunit 1 [Source:HGNC Symbol;Acc:HGNC:10586]	52.5832	-0.211888	0.33612	-0.630393	0.528438	0.806899	Non-sig.
113	6568	ENSG00000132334.17	PTPRE	protein tyrosine phosphatase receptor type E [Source:HGNC Symbol;Acc:HGNC:9669]	73.2214	0.158261	0.253774	0.623629	0.532872	0.809839	Non-sig.
114	12589	ENSG00000169403.12	PTAFR	platelet activating factor receptor [Source:HGNC Symbol;Acc:HGNC:9582]	42.6542	0.265299	0.428184	0.619591	0.535527	0.811168	Non-sig.
115	5221	ENSG00000121989.15	ACVR2A	activin A receptor type 2A [Source:HGNC Symbol;Acc:HGNC:173]	37.2436	0.16759	0.274394	0.610765	0.541355	0.8136	Non-sig.
116	11261	ENSG00000164136.17	IL15	interleukin 15 [Source:HGNC Symbol;Acc:HGNC:5977]	12.8186	-0.253555	0.415849	-0.609727	0.542042	0.813961	Non-sig.
117	12594	ENSG00000169429.11	CXCL8		109.45	-0.156708	0.262487	-0.597013	0.550499	0.81889	Non-sig.
118	10804	ENSG00000162711.18	NLRP3	NLR family pyrin domain containing 3 [Source:HGNC Symbol;Acc:HGNC:16400]	7.09888	-0.275523	0.489356	-0.563032	0.573413	0.830329	Non-sig.
119	13687	ENSG00000174437.18	ATP2A2	ATPase sarcoplasmic/endoplasmic reticulum Ca2+ transporting 2 [Source:HGNC Symbol;Acc:HGNC:812]	438.948	-0.0520939	0.0987572	-0.527495	0.59785	0.842982	Non-sig.
120	6216	ENSG00000130164.14	LDLR	low density lipoprotein receptor [Source:HGNC Symbol;Acc:HGNC:6547]	408.732	0.0784621	0.154923	0.506458	0.612535	0.850097	Non-sig.
121	1141	ENSG00000070961.16	ATP2B1	ATPase plasma membrane Ca2+ transporting 1 [Source:HGNC Symbol;Acc:HGNC:814]	610.41	-0.0583305	0.120399	-0.484475	0.628049	0.857278	Non-sig.
122	6830	ENSG00000134070.5	IRAK2	interleukin 1 receptor associated kinase 2 [Source:HGNC Symbol;Acc:HGNC:6113]	8.31543	-0.151833	0.34124	-0.444946	0.656359	0.870195	Non-sig.
123	17170	ENSG00000196639.7	HRH1	histamine receptor H1 [Source:HGNC Symbol;Acc:HGNC:5182]	96.515	0.130899	0.298162	0.43902	0.660647	0.872451	Non-sig.
124	19969	ENSG00000204681.11	GABBR1	gamma-aminobutyric acid type B receptor subunit 1 [Source:HGNC Symbol;Acc:HGNC:4070]	110.191	0.0873593	0.226138	0.38631	0.699267	0.888331	Non-sig.
125	6909	ENSG00000134470.21	IL15RA	interleukin 15 receptor subunit alpha [Source:HGNC Symbol;Acc:HGNC:5978]	7.47076	0.179343	0.493678	0.363279	0.716397	0.895535	Non-sig.
126	3207	ENSG00000105855.10	ITGB8	integrin subunit beta 8 [Source:HGNC Symbol;Acc:HGNC:6163]	47.9313	-0.103887	0.291205	-0.356748	0.721281	0.898341	Non-sig.
127	13081	ENSG00000171522.6	PTGER4	prostaglandin E receptor 4 [Source:HGNC Symbol;Acc:HGNC:9596]	10.5899	0.148614	0.431909	0.344086	0.730782	0.903712	Non-sig.
128	750	ENSG00000055332.19	EIF2AK2	eukaryotic translation initiation factor 2 alpha kinase 2 [Source:HGNC Symbol;Acc:HGNC:9437]	731.383	-0.035874	0.104839	-0.342181	0.732215	0.904536	Non-sig.
129	1873	ENSG00000090339.9	ICAM1	intercellular adhesion molecule 1 [Source:HGNC Symbol;Acc:HGNC:5344]	190.57	-0.0340223	0.102124	-0.333146	0.739024	0.906694	Non-sig.
130	1271	ENSG00000074660.16	SCARF1		9.36106	0.142465	0.452408	0.314904	0.752835	0.913094	Non-sig.
131	1376	ENSG00000077238.14	IL4R	interleukin 4 receptor [Source:HGNC Symbol;Acc:HGNC:6015]	97.1186	0.110177	0.368093	0.299318	0.764698	0.917822	Non-sig.
132	27099	ENSG00000226979.9	LTA	lymphotoxin alpha [Source:HGNC Symbol;Acc:HGNC:6709]	3.43666	-0.258655	0.897339	-0.288247	0.773158	0.9219	Non-sig.
133	555	ENSG00000038945.15	MSR1	macrophage scavenger receptor 1 [Source:HGNC Symbol;Acc:HGNC:7376]	8.18234	-0.173448	0.619399	-0.280026	0.779458	0.924919	Non-sig.
134	11329	ENSG00000164342.13	TLR3	toll like receptor 3 [Source:HGNC Symbol;Acc:HGNC:11849]	16.8542	-0.0996659	0.383565	-0.259841	0.794987	0.930063	Non-sig.
135	661	ENSG00000049249.9	TNFRSF9	TNF receptor superfamily member 9 [Source:HGNC Symbol;Acc:HGNC:11924]	3.42311	0.211783	0.843789	0.250991	0.801821	0.93234	Non-sig.
136	7459	ENSG00000137393.10	RNF144B	ring finger protein 144B [Source:HGNC Symbol;Acc:HGNC:21578]	45.7311	-0.0706763	0.333328	-0.212032	0.832082	0.943775	Non-sig.
137	4914	ENSG00000119535.18	CSF3R	colony stimulating factor 3 receptor [Source:HGNC Symbol;Acc:HGNC:2439]	5.11244	-0.144507	0.720825	-0.200475	0.841109	0.946723	Non-sig.
138	5411	ENSG00000123609.11	NMI	N-myc and STAT interactor [Source:HGNC Symbol;Acc:HGNC:7854]	63.9481	-0.0275995	0.165837	-0.166426	0.867822	0.956661	Non-sig.
139	10952	ENSG00000163251.4	FZD5	frizzled class receptor 5 [Source:HGNC Symbol;Acc:HGNC:4043]	23.2352	0.0364845	0.248019	0.147104	0.88305	0.961307	Non-sig.
140	8200	ENSG00000142166.13	IFNAR1	interferon alpha and beta receptor subunit 1 [Source:HGNC Symbol;Acc:HGNC:5432]	352.829	-0.0200449	0.152438	-0.131496	0.895383	0.965403	Non-sig.
141	6542	ENSG00000132155.13	RAF1		132.277	0.0099379	0.114859	0.0865228	0.931051	0.978885	Non-sig.
142	2379	ENSG00000100739.11	BDKRB1	bradykinin receptor B1 [Source:HGNC Symbol;Acc:HGNC:1029]	29.9492	-0.0190082	0.251104	-0.0756984	0.939659	0.981758	Non-sig.
143	13160	ENSG00000171860.5	C3AR1	complement C3a receptor 1 [Source:HGNC Symbol;Acc:HGNC:1319]	4.24099	0.0462835	0.765912	0.0604293	0.951814	0.98632	Non-sig.
144	7289	ENSG00000136514.3	RTP4	receptor transporter protein 4 [Source:HGNC Symbol;Acc:HGNC:23992]	7.36241	-0.0294032	0.623252	-0.0471771	0.962372	0.990807	Non-sig.
145	730	ENSG00000054523.19	KIF1B		359.168	-0.00636752	0.144247	-0.0441431	0.96479	0.991409	Non-sig.
146	41689	ENSG00000254087.8	LYN	LYN proto-oncogene, Src family tyrosine kinase [Source:HGNC Symbol;Acc:HGNC:6735]	103.551	-0.00786513	0.209409	-0.0375587	0.97004	0.992789	Non-sig.
147	51223	ENSG00000271503.6	CCL5	C-C motif chemokine ligand 5 [Source:HGNC Symbol;Acc:HGNC:10632]	11.4036	-0.0150609	0.458096	-0.0328771	0.973773	0.993514	Non-sig.
148	5198	ENSG00000121797.10	CCRL2	C-C motif chemokine receptor like 2 [Source:HGNC Symbol;Acc:HGNC:1612]	4.07295	-0.0263483	1.07083	-0.0246054	0.98037	0.994785	Non-sig.

## Sheet: GLYCOLYSIS Endo
	V1	gene_id	gene_name	description	baseMean	log2FoldChange	lfcSE	stat	pvalue	padj	sig
1	8868	ENSG00000146674.16	IGFBP3	insulin like growth factor binding protein 3 [Source:HGNC Symbol;Acc:HGNC:5472]	1383.81	2.49669	0.170106	14.6773	9.01215e-49	8.07038e-45	Sig. genes
2	12192	ENSG00000167772.12	ANGPTL4	angiopoietin like 4 [Source:HGNC Symbol;Acc:HGNC:16039]	236.25	2.84313	0.246632	11.5278	9.55551e-31	2.82793e-27	Sig. genes
3	1356	ENSG00000076716.9	GPC4	glypican 4 [Source:HGNC Symbol;Acc:HGNC:4452]	1041.16	0.863727	0.0902212	9.57343	1.03416e-21	7.97521e-19	Sig. genes
4	16110	ENSG00000185950.9	IRS2	insulin receptor substrate 2 [Source:HGNC Symbol;Acc:HGNC:6126]	718.157	0.867165	0.102369	8.47095	2.4339e-17	1.14714e-14	Sig. genes
5	1200	ENSG00000072682.20	P4HA2	prolyl 4-hydroxylase subunit alpha 2 [Source:HGNC Symbol;Acc:HGNC:8547]	471.608	0.723701	0.0918391	7.8801	3.27119e-15	1.12667e-12	Sig. genes
6	9597	ENSG00000152952.12	PLOD2	procollagen-lysine,2-oxoglutarate 5-dioxygenase 2 [Source:HGNC Symbol;Acc:HGNC:9082]	719.14	1.09167	0.140759	7.75563	8.79061e-15	2.81142e-12	Sig. genes
7	553	ENSG00000038427.16	VCAN	versican [Source:HGNC Symbol;Acc:HGNC:2464]	108.88	2.48498	0.323098	7.6911	1.45877e-14	4.35444e-12	Sig. genes
8	15187	ENSG00000182197.13	EXT1	exostosin glycosyltransferase 1 [Source:HGNC Symbol;Acc:HGNC:3512]	294.153	0.78053	0.107662	7.24981	4.17349e-13	9.42963e-11	Sig. genes
9	9022	ENSG00000147852.17	VLDLR	very low density lipoprotein receptor [Source:HGNC Symbol;Acc:HGNC:12698]	106.064	0.877202	0.148307	5.91477	3.32349e-09	3.39308e-07	Sig. genes
10	1277	ENSG00000074800.16	ENO1	enolase 1 [Source:HGNC Symbol;Acc:HGNC:3350]	18591.4	-0.426622	0.0737789	-5.78243	7.36279e-09	6.83251e-07	Sig. genes
11	4224	ENSG00000113739.11	STC2	stanniocalcin 2 [Source:HGNC Symbol;Acc:HGNC:11374]	2785.51	1.47072	0.255524	5.7557	8.62821e-09	7.84423e-07	Sig. genes
12	9389	ENSG00000151348.16	EXT2	exostosin glycosyltransferase 2 [Source:HGNC Symbol;Acc:HGNC:3513]	411.276	0.515154	0.0983542	5.23774	1.62558e-07	1.0639e-05	Sig. genes
13	6300	ENSG00000130635.16	COL5A1	collagen type V alpha 1 chain [Source:HGNC Symbol;Acc:HGNC:2209]	218.567	1.24307	0.242396	5.12827	2.92419e-07	1.77533e-05	Sig. genes
14	1684	ENSG00000086062.13	B4GALT1	beta-1,4-galactosyltransferase 1 [Source:HGNC Symbol;Acc:HGNC:924]	1178.6	0.485864	0.0977449	4.97073	6.67004e-07	3.63101e-05	Sig. genes
15	7049	ENSG00000135318.12	NT5E	5'-nucleotidase ecto [Source:HGNC Symbol;Acc:HGNC:8021]	469.626	0.466139	0.0988299	4.71658	2.39848e-06	0.000108477	Sig. genes
16	13848	ENSG00000175264.8	CHST1	carbohydrate sulfotransferase 1 [Source:HGNC Symbol;Acc:HGNC:1969]	259.578	-0.866617	0.187747	-4.61587	3.9145e-06	0.000164962	Sig. genes
17	12299	ENSG00000168209.6	DDIT4	DNA damage inducible transcript 4 [Source:HGNC Symbol;Acc:HGNC:24944]	465.834	0.765202	0.168579	4.53914	5.64848e-06	0.000230969	Sig. genes
18	1594	ENSG00000083444.17	PLOD1	procollagen-lysine,2-oxoglutarate 5-dioxygenase 1 [Source:HGNC Symbol;Acc:HGNC:9081]	610.427	0.490351	0.109173	4.49152	7.07182e-06	0.000282085	Sig. genes
19	14228	ENSG00000177156.11	TALDO1	transaldolase 1 [Source:HGNC Symbol;Acc:HGNC:11559]	490.844	0.373984	0.0989947	3.77782	0.000158209	0.00385513	Sig. genes
20	501	ENSG00000033100.16	CHPF2		302.254	0.447334	0.118769	3.76642	0.000165602	0.00395985	Sig. genes
21	352	ENSG00000014641.21	MDH1	malate dehydrogenase 1 [Source:HGNC Symbol;Acc:HGNC:6970]	361.245	-0.358217	0.0976751	-3.66743	0.000245002	0.0054374	Sig. genes
22	17034	ENSG00000196262.15	PPIA	peptidylprolyl isomerase A [Source:HGNC Symbol;Acc:HGNC:9253]	3141.2	-0.241675	0.0661982	-3.65078	0.000261445	0.00568262	Sig. genes
23	5324	ENSG00000122884.13	P4HA1	prolyl 4-hydroxylase subunit alpha 1 [Source:HGNC Symbol;Acc:HGNC:8546]	670.991	0.324029	0.0896948	3.61257	0.000303177	0.00636772	Sig. genes
24	8952	ENSG00000147257.15	GPC3		26.808	1.10341	0.311189	3.54578	0.00039146	0.00774702	Sig. genes
25	3470	ENSG00000107902.14	LHPP	phospholysine phosphohistidine inorganic pyrophosphate phosphatase [Source:HGNC Symbol;Acc:HGNC:30042]	25.0087	-0.974907	0.279102	-3.49301	0.000477606	0.00903643	Sig. genes
26	4195	ENSG00000113552.16	GNPDA1	glucosamine-6-phosphate deaminase 1 [Source:HGNC Symbol;Acc:HGNC:4417]	540.868	0.266131	0.0762119	3.49198	0.000479451	0.00903643	Sig. genes
27	12598	ENSG00000169439.12	SDC2	syndecan 2 [Source:HGNC Symbol;Acc:HGNC:10659]	374.212	-0.323973	0.0967487	-3.3486	0.000812215	0.0135951	Sig. genes
28	4558	ENSG00000116260.17	QSOX1	quiescin sulfhydryl oxidase 1 [Source:HGNC Symbol;Acc:HGNC:9756]	657.005	0.35155	0.114771	3.06307	0.00219082	0.0291947	Sig. genes
29	5087	ENSG00000120708.17	TGFBI	transforming growth factor beta induced [Source:HGNC Symbol;Acc:HGNC:11771]	4317.82	0.60512	0.199697	3.03018	0.00244404	0.0316735	Sig. genes
30	17717	ENSG00000198380.13	GFPT1	glutamine--fructose-6-phosphate transaminase 1 [Source:HGNC Symbol;Acc:HGNC:4241]	480.665	0.312534	0.104223	2.99872	0.00271117	0.0341855	Sig. genes
31	10729	ENSG00000162433.15	AK4	adenylate kinase 4 [Source:HGNC Symbol;Acc:HGNC:363]	1287.64	-0.226398	0.0780683	-2.9	0.00373167	0.0430633	Sig. genes
32	4248	ENSG00000114023.15	FAM162A		541.285	-0.245534	0.0854229	-2.87433	0.00404883	0.0454637	Sig. genes
33	442	ENSG00000024526.17	DEPDC1	DEP domain containing 1 [Source:HGNC Symbol;Acc:HGNC:22949]	8.56021	2.20587	0.774039	2.84982	0.00437445	0.0483215	Sig. genes
34	3230	ENSG00000105976.16	MET	MET proto-oncogene, receptor tyrosine kinase [Source:HGNC Symbol;Acc:HGNC:7029]	594.234	0.41466	0.153813	2.69587	0.0070205	0.0676006	Non-sig.
35	10445	ENSG00000160211.19	G6PD		223.733	0.348217	0.130651	2.66526	0.00769294	0.0717282	Non-sig.
36	35756	ENSG00000240972.2	MIF	macrophage migration inhibitory factor [Source:HGNC Symbol;Acc:HGNC:7097]	2963.07	-0.212937	0.0825768	-2.57865	0.00991874	0.0859016	Non-sig.
37	1028	ENSG00000067992.16	PDK3		195.303	-0.277267	0.110158	-2.51699	0.0118361	0.0971957	Non-sig.
38	10346	ENSG00000159399.10	HK2	hexokinase 2 [Source:HGNC Symbol;Acc:HGNC:4923]	133.849	0.467027	0.187357	2.49271	0.0126772	0.102007	Non-sig.
39	10660	ENSG00000161980.6	POLR3K	RNA polymerase III subunit K [Source:HGNC Symbol;Acc:HGNC:14121]	65.2847	-0.415262	0.166837	-2.48904	0.012809	0.102828	Non-sig.
40	7335	ENSG00000136810.13	TXN	thioredoxin [Source:HGNC Symbol;Acc:HGNC:12435]	601.599	0.359736	0.145074	2.47967	0.0131503	0.10463	Non-sig.
41	772	ENSG00000057294.16	PKP2	plakophilin 2 [Source:HGNC Symbol;Acc:HGNC:9024]	19.5169	0.686228	0.27885	2.46092	0.0138581	0.108621	Non-sig.
42	12698	ENSG00000169902.15	TPST1	tyrosylprotein sulfotransferase 1 [Source:HGNC Symbol;Acc:HGNC:12020]	56.865	0.598969	0.248447	2.41085	0.0159153	0.12022	Non-sig.
43	2214	ENSG00000100196.11	KDELR3	KDEL endoplasmic reticulum protein retention receptor 3 [Source:HGNC Symbol;Acc:HGNC:6306]	234.908	-0.399346	0.167357	-2.38618	0.0170242	0.125374	Non-sig.
44	949	ENSG00000065833.9	ME1	malic enzyme 1 [Source:HGNC Symbol;Acc:HGNC:6983]	178.176	0.345821	0.14536	2.37906	0.0173568	0.126867	Non-sig.
45	503	ENSG00000033170.17	FUT8	fucosyltransferase 8 [Source:HGNC Symbol;Acc:HGNC:4019]	60.7568	0.518465	0.220679	2.34941	0.018803	0.133529	Non-sig.
46	12669	ENSG00000169764.16	UGP2	UDP-glucose pyrophosphorylase 2 [Source:HGNC Symbol;Acc:HGNC:12527]	474.763	0.270076	0.117326	2.30194	0.0213386	0.144217	Non-sig.
47	10746	ENSG00000162512.16	SDC3	syndecan 3 [Source:HGNC Symbol;Acc:HGNC:10660]	92.6087	0.476843	0.207491	2.29813	0.0215543	0.144842	Non-sig.
48	8818	ENSG00000146242.9	TPBG	trophoblast glycoprotein [Source:HGNC Symbol;Acc:HGNC:12004]	81.7124	0.415311	0.18233	2.27779	0.0227388	0.14936	Non-sig.
49	9431	ENSG00000151640.13	DPYSL4	dihydropyrimidinase like 4 [Source:HGNC Symbol;Acc:HGNC:3016]	50.7439	0.43458	0.197626	2.199	0.0278776	0.171106	Non-sig.
50	4744	ENSG00000117632.23	STMN1	stathmin 1 [Source:HGNC Symbol;Acc:HGNC:6510]	233.072	0.229663	0.107157	2.14323	0.0320943	0.186645	Non-sig.
51	8945	ENSG00000147224.13	PRPS1	phosphoribosyl pyrophosphate synthetase 1 [Source:HGNC Symbol;Acc:HGNC:9462]	89.6856	0.408028	0.191581	2.12979	0.0331887	0.190699	Non-sig.
52	608	ENSG00000044574.9	HSPA5	heat shock protein family A (Hsp70) member 5 [Source:HGNC Symbol;Acc:HGNC:5238]	5064.11	0.246407	0.116415	2.11664	0.0342908	0.194474	Non-sig.
53	8128	ENSG00000141526.18	SLC16A3	solute carrier family 16 member 3 [Source:HGNC Symbol;Acc:HGNC:10924]	368.921	0.373351	0.177138	2.10769	0.0350578	0.197448	Non-sig.
54	302	ENSG00000011465.18	DCN	decorin [Source:HGNC Symbol;Acc:HGNC:2705]	3378.1	0.392345	0.187539	2.09207	0.0364323	0.202201	Non-sig.
55	11470	ENSG00000164904.18	ALDH7A1	aldehyde dehydrogenase 7 family member A1 [Source:HGNC Symbol;Acc:HGNC:877]	619.472	-0.697376	0.337894	-2.06389	0.0390281	0.211112	Non-sig.
56	13026	ENSG00000171314.9	PGAM1	phosphoglycerate mutase 1 [Source:HGNC Symbol;Acc:HGNC:8888]	1232.8	-0.142062	0.0707371	-2.0083	0.0446111	0.227645	Non-sig.
57	9632	ENSG00000153208.17	MERTK		27.9627	0.606379	0.307501	1.97196	0.0486142	0.240852	Non-sig.
58	13544	ENSG00000173599.15	PC	pyruvate carboxylase [Source:HGNC Symbol;Acc:HGNC:8636]	33.1567	-0.677388	0.344632	-1.96554	0.0493518	0.243094	Non-sig.
59	6483	ENSG00000131724.11	IL13RA1	interleukin 13 receptor subunit alpha 1 [Source:HGNC Symbol;Acc:HGNC:5974]	523.327	-0.235901	0.120053	-1.96497	0.0494177	0.243151	Non-sig.
60	5176	ENSG00000121578.13	B4GALT4	beta-1,4-galactosyltransferase 4 [Source:HGNC Symbol;Acc:HGNC:927]	142.572	0.361369	0.18447	1.95896	0.0501177	0.245449	Non-sig.
61	3538	ENSG00000108479.13	GALK1	galactokinase 1 [Source:HGNC Symbol;Acc:HGNC:4118]	49.5604	-0.426504	0.218978	-1.9477	0.0514506	0.249656	Non-sig.
62	7453	ENSG00000137331.12	IER3	immediate early response 3 [Source:HGNC Symbol;Acc:HGNC:5392]	9708.73	-0.174045	0.089883	-1.93635	0.0528248	0.25302	Non-sig.
63	6949	ENSG00000134755.18	DSC2	desmocollin 2 [Source:HGNC Symbol;Acc:HGNC:3036]	132.89	1.01171	0.52476	1.92794	0.0538622	0.255745	Non-sig.
64	2950	ENSG00000104695.13	PPP2CB	protein phosphatase 2 catalytic subunit beta [Source:HGNC Symbol;Acc:HGNC:9300]	542.815	0.168516	0.0884275	1.9057	0.0566895	0.26406	Non-sig.
65	228	ENSG00000008838.20	MED24		146.762	-0.21461	0.114922	-1.86745	0.0618394	0.278698	Non-sig.
66	5727	ENSG00000125826.21	RBCK1	RANBP2-type and C3HC4-type zinc finger containing 1 [Source:HGNC Symbol;Acc:HGNC:15864]	439.628	0.219009	0.117511	1.86373	0.0623601	0.279899	Non-sig.
67	4706	ENSG00000117411.18	B4GALT2	beta-1,4-galactosyltransferase 2 [Source:HGNC Symbol;Acc:HGNC:925]	348.858	0.173609	0.0948308	1.83072	0.0671423	0.292769	Non-sig.
68	4101	ENSG00000112715.25	VEGFA		413.696	0.371446	0.203218	1.82782	0.067577	0.293392	Non-sig.
69	15423	ENSG00000183196.10	CHST6	carbohydrate sulfotransferase 6 [Source:HGNC Symbol;Acc:HGNC:6938]	897.527	-0.219796	0.122298	-1.79722	0.0723008	0.303541	Non-sig.
70	6656	ENSG00000132780.17	NASP	nuclear autoantigenic sperm protein [Source:HGNC Symbol;Acc:HGNC:7644]	337.848	0.176094	0.0990798	1.7773	0.0755191	0.31136	Non-sig.
71	9224	ENSG00000149541.10	B3GAT3	beta-1,3-glucuronyltransferase 3 [Source:HGNC Symbol;Acc:HGNC:923]	91.4585	-0.247527	0.139761	-1.77107	0.0765498	0.31366	Non-sig.
72	10036	ENSG00000156958.15	GALK2	galactokinase 2 [Source:HGNC Symbol;Acc:HGNC:4119]	204.762	-0.312227	0.176859	-1.7654	0.0774967	0.315493	Non-sig.
73	4471	ENSG00000115677.18	HDLBP	high density lipoprotein binding protein [Source:HGNC Symbol;Acc:HGNC:4857]	1656.99	-0.158903	0.0931529	-1.70584	0.0880387	0.340629	Non-sig.
74	4692	ENSG00000117308.15	GALE	UDP-galactose-4-epimerase [Source:HGNC Symbol;Acc:HGNC:4116]	74.1217	0.393982	0.233341	1.68844	0.0913275	0.347007	Non-sig.
75	12760	ENSG00000170191.5	NANP	N-acetylneuraminic acid phosphatase [Source:HGNC Symbol;Acc:HGNC:16140]	24.0669	0.392974	0.234249	1.67759	0.0934273	0.350426	Non-sig.
76	4742	ENSG00000117620.15	SLC35A3	solute carrier family 35 member A3 [Source:HGNC Symbol;Acc:HGNC:11023]	143.575	-0.217849	0.132922	-1.63893	0.101228	0.366262	Non-sig.
77	995	ENSG00000067057.18	PFKP	phosphofructokinase, platelet [Source:HGNC Symbol;Acc:HGNC:8878]	981.614	0.292134	0.187579	1.55739	0.119378	0.402057	Non-sig.
78	10301	ENSG00000159167.12	STC1	stanniocalcin 1 [Source:HGNC Symbol;Acc:HGNC:11373]	2047.17	-0.292057	0.193016	-1.51312	0.130248	0.420697	Non-sig.
79	5644	ENSG00000125398.8	SOX9	SRY-box transcription factor 9 [Source:HGNC Symbol;Acc:HGNC:11204]	34.5198	0.522117	0.345536	1.51104	0.130779	0.421496	Non-sig.
80	8585	ENSG00000144591.20	GMPPA	GDP-mannose pyrophosphorylase A [Source:HGNC Symbol;Acc:HGNC:22923]	61.296	0.272246	0.183949	1.48001	0.13887	0.432946	Non-sig.
81	10402	ENSG00000159921.20	GNE	glucosamine (UDP-N-acetyl)-2-epimerase/N-acetylmannosamine kinase [Source:HGNC Symbol;Acc:HGNC:23657]	44.2162	0.439548	0.297827	1.47585	0.139984	0.434881	Non-sig.
82	10428	ENSG00000160180.17	TFF3	trefoil factor 3 [Source:HGNC Symbol;Acc:HGNC:11757]	17.6631	-0.603027	0.411858	-1.46416	0.143149	0.441123	Non-sig.
83	9530	ENSG00000152413.15	HOMER1	homer scaffold protein 1 [Source:HGNC Symbol;Acc:HGNC:17512]	306.72	-0.164516	0.11271	-1.45964	0.14439	0.44311	Non-sig.
84	6093	ENSG00000128989.11	ARPP19	cAMP regulated phosphoprotein 19 [Source:HGNC Symbol;Acc:HGNC:16967]	280.795	0.210444	0.146028	1.44112	0.149551	0.452214	Non-sig.
85	1055	ENSG00000068796.19	KIF2A	kinesin family member 2A [Source:HGNC Symbol;Acc:HGNC:6318]	448.128	-0.22091	0.153894	-1.43547	0.151154	0.454527	Non-sig.
86	6887	ENSG00000134333.14	LDHA	lactate dehydrogenase A [Source:HGNC Symbol;Acc:HGNC:6535]	3164.47	-0.124951	0.0880151	-1.41966	0.155708	0.461509	Non-sig.
87	10796	ENSG00000162688.17	AGL	amylo-alpha-1, 6-glucosidase, 4-alpha-glucanotransferase [Source:HGNC Symbol;Acc:HGNC:321]	179.678	-0.2401	0.170331	-1.40961	0.158656	0.465059	Non-sig.
88	9023	ENSG00000147853.17	AK3	adenylate kinase 3 [Source:HGNC Symbol;Acc:HGNC:17376]	855.556	-0.0982956	0.0699036	-1.40616	0.159677	0.466071	Non-sig.
89	444	ENSG00000025039.15	RRAGD	Ras related GTP binding D [Source:HGNC Symbol;Acc:HGNC:19903]	488.964	0.143175	0.102177	1.40124	0.161143	0.468161	Non-sig.
90	13802	ENSG00000175040.6	CHST2	carbohydrate sulfotransferase 2 [Source:HGNC Symbol;Acc:HGNC:1970]	13.5388	0.727607	0.522961	1.39132	0.164128	0.473236	Non-sig.
91	458	ENSG00000026508.20	CD44		546.009	0.55949	0.410485	1.363	0.172883	0.48494	Non-sig.
92	12705	ENSG00000169919.17	GUSB	glucuronidase beta [Source:HGNC Symbol;Acc:HGNC:4696]	175.68	-0.16523	0.121279	-1.36239	0.173074	0.485236	Non-sig.
93	327	ENSG00000013275.8	PSMC4	proteasome 26S subunit, ATPase 4 [Source:HGNC Symbol;Acc:HGNC:9551]	485.527	0.122284	0.0909787	1.34409	0.178919	0.492703	Non-sig.
94	4619	ENSG00000116761.12	CTH	cystathionine gamma-lyase [Source:HGNC Symbol;Acc:HGNC:2501]	30.983	-0.366392	0.279221	-1.31219	0.189456	0.50629	Non-sig.
95	4130	ENSG00000112984.12	KIF20A	kinesin family member 20A [Source:HGNC Symbol;Acc:HGNC:9787]	5.67956	1.11022	0.861157	1.28923	0.19732	0.516224	Non-sig.
96	12568	ENSG00000169299.14	PGM2	phosphoglucomutase 2 [Source:HGNC Symbol;Acc:HGNC:8906]	65.2828	-0.245854	0.191874	-1.28133	0.200077	0.52001	Non-sig.
97	10437	ENSG00000160194.18	NDUFV3	NADH:ubiquinone oxidoreductase subunit V3 [Source:HGNC Symbol;Acc:HGNC:7719]	444.216	-0.0887601	0.076159	-1.16546	0.243834	0.571082	Non-sig.
98	1919	ENSG00000091140.14	DLD		222.269	-0.112883	0.0990429	-1.13974	0.254396	0.583085	Non-sig.
99	4709	ENSG00000117448.14	AKR1A1	aldo-keto reductase family 1 member A1 [Source:HGNC Symbol;Acc:HGNC:380]	312.441	0.113339	0.101169	1.1203	0.262587	0.59216	Non-sig.
100	2934	ENSG00000104522.16	GFUS	GDP-L-fucose synthase [Source:HGNC Symbol;Acc:HGNC:12390]	88.395	0.181949	0.163811	1.11073	0.266685	0.596468	Non-sig.
101	2636	ENSG00000102144.15	PGK1	phosphoglycerate kinase 1 [Source:HGNC Symbol;Acc:HGNC:8896]	1018.54	-0.0851685	0.0769266	-1.10714	0.268233	0.598202	Non-sig.
102	1562	ENSG00000082212.13	ME2	malic enzyme 2 [Source:HGNC Symbol;Acc:HGNC:6984]	152.853	-0.198542	0.179578	-1.1056	0.268899	0.598753	Non-sig.
103	6154	ENSG00000129521.15	EGLN3	egl-9 family hypoxia inducible factor 3 [Source:HGNC Symbol;Acc:HGNC:14661]	276.81	0.190435	0.178603	1.06625	0.286312	0.61923	Non-sig.
104	12787	ENSG00000170312.16	CDK1		30.7484	0.697638	0.656914	1.06199	0.288238	0.621374	Non-sig.
105	7741	ENSG00000138794.10	CASP6	caspase 6 [Source:HGNC Symbol;Acc:HGNC:1507]	67.6207	0.200147	0.188814	1.06003	0.289133	0.62209	Non-sig.
106	7635	ENSG00000138271.6	GPR87	G protein-coupled receptor 87 [Source:HGNC Symbol;Acc:HGNC:4538]	18.1834	0.685808	0.653406	1.04959	0.293907	0.625962	Non-sig.
107	9184	ENSG00000149260.18	CAPN5	calpain 5 [Source:HGNC Symbol;Acc:HGNC:1482]	51.8756	0.268444	0.261551	1.02635	0.304725	0.636872	Non-sig.
108	4999	ENSG00000120053.12	GOT1	glutamic-oxaloacetic transaminase 1 [Source:HGNC Symbol;Acc:HGNC:4432]	198.173	-0.117198	0.117966	-0.993486	0.320473	0.650831	Non-sig.
109	5323	ENSG00000122882.11	ECD	ecdysoneless cell cycle regulator [Source:HGNC Symbol;Acc:HGNC:17029]	118.942	-0.247752	0.257696	-0.961413	0.336345	0.664967	Non-sig.
110	67	ENSG00000004864.14	SLC25A13	solute carrier family 25 member 13 [Source:HGNC Symbol;Acc:HGNC:10983]	163.945	-0.130622	0.136483	-0.95706	0.338537	0.667143	Non-sig.
111	11028	ENSG00000163516.14	ANKZF1	ankyrin repeat and zinc finger peptidyl tRNA hydrolase 1 [Source:HGNC Symbol;Acc:HGNC:25527]	178.914	-0.137694	0.144214	-0.954795	0.339682	0.66847	Non-sig.
112	8347	ENSG00000143252.16	SDHC	succinate dehydrogenase complex subunit C [Source:HGNC Symbol;Acc:HGNC:10682]	255.247	-0.107364	0.115992	-0.925614	0.354647	0.682079	Non-sig.
113	3926	ENSG00000111669.15	TPI1	triosephosphate isomerase 1 [Source:HGNC Symbol;Acc:HGNC:12009]	1728.67	-0.0676584	0.073396	-0.921827	0.356619	0.683612	Non-sig.
114	8873	ENSG00000146701.12	MDH2	malate dehydrogenase 2 [Source:HGNC Symbol;Acc:HGNC:6971]	365.975	-0.0920026	0.100234	-0.917877	0.358683	0.684899	Non-sig.
115	866	ENSG00000063660.9	GPC1	glypican 1 [Source:HGNC Symbol;Acc:HGNC:4449]	276.369	0.109332	0.119641	0.913834	0.360804	0.686241	Non-sig.
116	14754	ENSG00000179913.11	B3GNT3	UDP-GlcNAc:betaGal beta-1,3-N-acetylglucosaminyltransferase 3 [Source:HGNC Symbol;Acc:HGNC:13528]	6.44847	0.695376	0.772593	0.900054	0.368092	0.692743	Non-sig.
117	13236	ENSG00000172183.16	ISG20	interferon stimulated exonuclease gene 20 [Source:HGNC Symbol;Acc:HGNC:6130]	37.1369	0.190745	0.216127	0.88256	0.377474	0.701303	Non-sig.
118	13465	ENSG00000173221.14	GLRX	glutaredoxin [Source:HGNC Symbol;Acc:HGNC:4330]	130.065	0.111846	0.127339	0.87833	0.379765	0.703007	Non-sig.
119	8865	ENSG00000146648.20	EGFR	epidermal growth factor receptor [Source:HGNC Symbol;Acc:HGNC:3236]	541.336	0.101257	0.118275	0.85612	0.391932	0.712856	Non-sig.
120	3929	ENSG00000111674.9	ENO2	enolase 2 [Source:HGNC Symbol;Acc:HGNC:3353]	578.716	0.0979986	0.122444	0.800355	0.423505	0.734689	Non-sig.
121	498	ENSG00000033011.14	ALG1	ALG1 chitobiosyldiphosphodolichol beta-mannosyltransferase [Source:HGNC Symbol;Acc:HGNC:18294]	113.421	-0.110487	0.140946	-0.783895	0.433102	0.743336	Non-sig.
122	8475	ENSG00000143847.15	PPFIA4		11.3065	0.344711	0.444327	0.775804	0.437865	0.747228	Non-sig.
123	8034	ENSG00000140939.14	NOL3	nucleolar protein 3 [Source:HGNC Symbol;Acc:HGNC:7869]	140.298	-0.0994306	0.128829	-0.771805	0.44023	0.748127	Non-sig.
124	8960	ENSG00000147383.11	NSDHL	NAD(P) dependent steroid dehydrogenase-like [Source:HGNC Symbol;Acc:HGNC:13398]	172.497	-0.0923443	0.126518	-0.72989	0.465457	0.766207	Non-sig.
125	8734	ENSG00000145730.21	PAM	peptidylglycine alpha-amidating monooxygenase [Source:HGNC Symbol;Acc:HGNC:8596]	225.479	-0.0827422	0.115511	-0.716311	0.473799	0.772547	Non-sig.
126	53	ENSG00000004478.8	FKBP4	FKBP prolyl isomerase 4 [Source:HGNC Symbol;Acc:HGNC:3720]	284.897	-0.204418	0.285526	-0.715935	0.474032	0.772653	Non-sig.
127	10072	ENSG00000157212.19	PAXIP1	PAX interacting protein 1 [Source:HGNC Symbol;Acc:HGNC:8624]	66.764	-0.214773	0.323129	-0.664668	0.506263	0.793014	Non-sig.
128	7511	ENSG00000137700.18	SLC37A4	solute carrier family 37 member 4 [Source:HGNC Symbol;Acc:HGNC:4061]	107.376	-0.0892712	0.140164	-0.636907	0.524185	0.804213	Non-sig.
129	7663	ENSG00000138413.14	IDH1	isocitrate dehydrogenase (NADP(+)) 1 [Source:HGNC Symbol;Acc:HGNC:5382]	214.112	0.103702	0.16508	0.62819	0.52988	0.807878	Non-sig.
130	1197	ENSG00000072571.20	HMMR	hyaluronan mediated motility receptor [Source:HGNC Symbol;Acc:HGNC:5012]	7.7111	0.384065	0.638063	0.601923	0.547225	0.817278	Non-sig.
131	467	ENSG00000027847.14	B4GALT7	beta-1,4-galactosyltransferase 7 [Source:HGNC Symbol;Acc:HGNC:930]	172.968	-0.070896	0.119006	-0.595733	0.551354	0.819413	Non-sig.
132	5219	ENSG00000121966.7	CXCR4		54.723	0.209666	0.352101	0.595471	0.551529	0.819537	Non-sig.
133	831	ENSG00000061656.11	SPAG4	sperm associated antigen 4 [Source:HGNC Symbol;Acc:HGNC:11214]	23.1904	0.170368	0.289342	0.588813	0.555987	0.820885	Non-sig.
134	4497	ENSG00000115884.11	SDC1	syndecan 1 [Source:HGNC Symbol;Acc:HGNC:10658]	346.906	0.231702	0.39374	0.588465	0.55622	0.820926	Non-sig.
135	7239	ENSG00000136213.10	CHST12	carbohydrate sulfotransferase 12 [Source:HGNC Symbol;Acc:HGNC:17423]	126.22	-0.0621491	0.10758	-0.577703	0.563465	0.825155	Non-sig.
136	364	ENSG00000015532.10	XYLT2	xylosyltransferase 2 [Source:HGNC Symbol;Acc:HGNC:15517]	133.186	-0.0649207	0.112845	-0.575308	0.565083	0.825863	Non-sig.
137	6092	ENSG00000128973.13	CLN6	CLN6 transmembrane ER protein [Source:HGNC Symbol;Acc:HGNC:2077]	33.0103	0.143987	0.261781	0.550027	0.582301	0.83531	Non-sig.
138	9698	ENSG00000153936.17	HS2ST1		175.658	-0.0704682	0.129495	-0.544177	0.58632	0.837934	Non-sig.
139	11242	ENSG00000164105.4	SAP30	Sin3A associated protein 30 [Source:HGNC Symbol;Acc:HGNC:10532]	142.667	-0.0744808	0.137366	-0.542205	0.587677	0.838643	Non-sig.
140	8319	ENSG00000143149.12	ALDH9A1		365.255	-0.0362891	0.0673808	-0.538567	0.590186	0.839749	Non-sig.
141	14547	ENSG00000178802.18	MPI	mannose phosphate isomerase [Source:HGNC Symbol;Acc:HGNC:7216]	62.3379	-0.0918338	0.178334	-0.514954	0.606585	0.84715	Non-sig.
142	10834	ENSG00000162813.18	BPNT1	3'(2'), 5'-bisphosphate nucleotidase 1 [Source:HGNC Symbol;Acc:HGNC:1096]	57.7721	0.0895398	0.17433	0.513624	0.607515	0.847282	Non-sig.
143	1007	ENSG00000067225.19	PKM		3080.25	-0.0434636	0.0881151	-0.493259	0.621829	0.853624	Non-sig.
144	10949	ENSG00000163235.16	TGFA	transforming growth factor alpha [Source:HGNC Symbol;Acc:HGNC:11765]	36.5764	0.166511	0.358903	0.463945	0.642687	0.864416	Non-sig.
145	11826	ENSG00000166347.19	CYB5A	cytochrome b5 type A [Source:HGNC Symbol;Acc:HGNC:2570]	87.2562	-0.0585349	0.126103	-0.464183	0.642516	0.864416	Non-sig.
146	16848	ENSG00000188994.13	ZNF292	zinc finger protein 292 [Source:HGNC Symbol;Acc:HGNC:18410]	792.694	0.0983585	0.217031	0.4532	0.650405	0.867727	Non-sig.
147	16634	ENSG00000188157.15	AGRN	agrin [Source:HGNC Symbol;Acc:HGNC:329]	23.0681	-0.122636	0.298415	-0.410958	0.681104	0.880508	Non-sig.
148	2248	ENSG00000100290.3	BIK	BCL2 interacting killer [Source:HGNC Symbol;Acc:HGNC:1051]	4.93826	-0.306011	0.757823	-0.403802	0.686358	0.882777	Non-sig.
149	8003	ENSG00000140650.13	PMM2	phosphomannomutase 2 [Source:HGNC Symbol;Acc:HGNC:9115]	144.178	-0.0603935	0.167356	-0.360868	0.718198	0.8968	Non-sig.
150	8431	ENSG00000143590.14	EFNA3	ephrin A3 [Source:HGNC Symbol;Acc:HGNC:3223]	41.9307	-0.0788848	0.22516	-0.35035	0.726076	0.901277	Non-sig.
151	8429	ENSG00000143575.15	HAX1	HCLS1 associated protein X-1 [Source:HGNC Symbol;Acc:HGNC:16915]	549.708	0.0257957	0.0759132	0.339805	0.734003	0.904811	Non-sig.
152	22737	ENSG00000214274.10	ANG	angiogenin [Source:HGNC Symbol;Acc:HGNC:483]	117.484	0.0469638	0.149995	0.313101	0.754204	0.913666	Non-sig.
153	15728	ENSG00000184432.11	COPB2	COPI coat complex subunit beta 2 [Source:HGNC Symbol;Acc:HGNC:2232]	575.294	-0.0233365	0.07514	-0.310573	0.756125	0.9143	Non-sig.
154	2967	ENSG00000104812.15	GYS1	glycogen synthase 1 [Source:HGNC Symbol;Acc:HGNC:4706]	48.7772	-0.0611105	0.198101	-0.308482	0.757716	0.914899	Non-sig.
155	4703	ENSG00000117407.17	ARTN	artemin [Source:HGNC Symbol;Acc:HGNC:727]	11.0358	0.141646	0.469192	0.301892	0.762734	0.917053	Non-sig.
156	7685	ENSG00000138604.10	GLCE	glucuronic acid epimerase [Source:HGNC Symbol;Acc:HGNC:17855]	77.3859	-0.0598877	0.206533	-0.289967	0.771841	0.921763	Non-sig.
157	7147	ENSG00000135775.14	COG2	component of oligomeric golgi complex 2 [Source:HGNC Symbol;Acc:HGNC:6546]	133.858	-0.0467365	0.167579	-0.278892	0.780328	0.92496	Non-sig.
158	11354	ENSG00000164442.10	CITED2	Cbp/p300 interacting transactivator with Glu/Asp rich carboxy-terminal domain 2 [Source:HGNC Symbol;Acc:HGNC:1987]	111.27	-0.036706	0.132376	-0.277286	0.78156	0.925044	Non-sig.
159	8201	ENSG00000142168.15	SOD1	superoxide dismutase 1 [Source:HGNC Symbol;Acc:HGNC:11179]	1157.34	0.0183982	0.0714441	0.25752	0.796778	0.930653	Non-sig.
160	4211	ENSG00000113643.9	RARS1	arginyl-tRNA synthetase 1 [Source:HGNC Symbol;Acc:HGNC:9870]	470.363	-0.0251822	0.100095	-0.251583	0.801363	0.932113	Non-sig.
161	4987	ENSG00000119950.21	MXI1	MAX interactor 1, dimerization protein [Source:HGNC Symbol;Acc:HGNC:7534]	442.968	-0.0261068	0.104022	-0.250975	0.801833	0.93234	Non-sig.
162	2422	ENSG00000100994.12	PYGB	glycogen phosphorylase B [Source:HGNC Symbol;Acc:HGNC:9723]	140.822	-0.0323729	0.1363	-0.237512	0.81226	0.935595	Non-sig.
163	5981	ENSG00000128039.13	SRD5A3	steroid 5 alpha-reductase 3 [Source:HGNC Symbol;Acc:HGNC:25812]	49.9714	0.0661067	0.295258	0.223895	0.822839	0.940334	Non-sig.
164	17572	ENSG00000197930.13	ERO1A	endoplasmic reticulum oxidoreductase 1 alpha [Source:HGNC Symbol;Acc:HGNC:13280]	351.932	0.0295207	0.143832	0.205244	0.837381	0.945201	Non-sig.
165	17502	ENSG00000197713.15	RPE	ribulose-5-phosphate-3-epimerase [Source:HGNC Symbol;Acc:HGNC:10293]	65.6318	0.0282039	0.142792	0.197517	0.843423	0.947552	Non-sig.
166	13988	ENSG00000176022.7	B3GALT6	beta-1,3-galactosyltransferase 6 [Source:HGNC Symbol;Acc:HGNC:17978]	116.534	0.0229978	0.119593	0.1923	0.847507	0.949212	Non-sig.
167	15387	ENSG00000183048.12	SLC25A10	solute carrier family 25 member 10 [Source:HGNC Symbol;Acc:HGNC:10980]	24.4428	-0.0614688	0.356705	-0.172324	0.863183	0.95524	Non-sig.
168	6250	ENSG00000130313.7	PGLS	6-phosphogluconolactonase [Source:HGNC Symbol;Acc:HGNC:8903]	77.5732	0.0285621	0.165996	0.172065	0.863387	0.955317	Non-sig.
169	5617	ENSG00000125166.13	GOT2	glutamic-oxaloacetic transaminase 2 [Source:HGNC Symbol;Acc:HGNC:4433]	435.121	-0.0120319	0.080679	-0.149133	0.881449	0.960849	Non-sig.
170	605	ENSG00000044446.12	PHKA2	phosphorylase kinase regulatory subunit alpha 2 [Source:HGNC Symbol;Acc:HGNC:8926]	115.314	-0.0173801	0.136119	-0.127683	0.8984	0.966794	Non-sig.
171	9	ENSG00000001084.13	GCLC	glutamate-cysteine ligase catalytic subunit [Source:HGNC Symbol;Acc:HGNC:4311]	106.078	0.0143978	0.128559	0.111994	0.910828	0.972803	Non-sig.
172	4468	ENSG00000115657.14	ABCB6	ATP binding cassette subfamily B member 6 (Langereis blood group) [Source:HGNC Symbol;Acc:HGNC:47]	62.1002	-0.0245201	0.220686	-0.111109	0.91153	0.972932	Non-sig.
173	5437	ENSG00000123989.14	CHPF		548.437	0.00844924	0.0931049	0.0907496	0.927692	0.978156	Non-sig.
174	2328	ENSG00000100504.17	PYGL	glycogen phosphorylase L [Source:HGNC Symbol;Acc:HGNC:9725]	80.137	0.021278	0.2391	0.0889923	0.929088	0.97851	Non-sig.
175	5915	ENSG00000127415.13	IDUA	alpha-L-iduronidase [Source:HGNC Symbol;Acc:HGNC:5391]	35.1938	-0.0219535	0.259768	-0.0845119	0.932649	0.979447	Non-sig.
176	1753	ENSG00000087586.18	AURKA	aurora kinase A [Source:HGNC Symbol;Acc:HGNC:11393]	27.5679	-0.0130208	0.274017	-0.0475182	0.9621	0.990807	Non-sig.
177	9266	ENSG00000149925.22	ALDOA	aldolase, fructose-bisphosphate A [Source:HGNC Symbol;Acc:HGNC:414]	1864.84	-0.00300235	0.0713092	-0.0421033	0.966416	0.991568	Non-sig.
178	11001	ENSG00000163435.16	ELF3	E74 like ETS transcription factor 3 [Source:HGNC Symbol;Acc:HGNC:3318]	148.686	-0.00672114	0.4372	-0.0153732	0.987734	0.99675	Non-sig.
179	13528	ENSG00000173540.14	GMPPB	GDP-mannose pyrophosphorylase B [Source:HGNC Symbol;Acc:HGNC:22932]	46.0727	0.00247444	0.218063	0.0113474	0.990946	0.997743	Non-sig.
180	11551	ENSG00000165215.6	CLDN3	claudin 3 [Source:HGNC Symbol;Acc:HGNC:2045]	3.8862	0.00566307	0.622988	0.00909019	0.992747	0.998202	Non-sig.

## Sheet: OXIDATIVE_PHOSPHORYLATION Endo
	V1	gene_id	gene_name	description	baseMean	log2FoldChange	lfcSE	stat	pvalue	padj	sig
1	7182	ENSG00000135940.7	COX5B	cytochrome c oxidase subunit 5B [Source:HGNC Symbol;Acc:HGNC:2269]	1440.4	-0.348864	0.0541247	-6.44556	1.15174e-10	1.66352e-08	Sig. genes
2	10309	ENSG00000159199.14	ATP5MC1	ATP synthase membrane subunit c locus 1 [Source:HGNC Symbol;Acc:HGNC:841]	635.808	-0.541455	0.0889995	-6.0838	1.17369e-09	1.34817e-07	Sig. genes
3	6408	ENSG00000131143.10	COX4I1	cytochrome c oxidase subunit 4I1 [Source:HGNC Symbol;Acc:HGNC:2265]	3127.52	-0.304819	0.0527277	-5.781	7.42601e-09	6.85566e-07	Sig. genes
4	3835	ENSG00000110955.9	ATP5F1B	ATP synthase F1 subunit beta [Source:HGNC Symbol;Acc:HGNC:830]	1167.8	-0.320132	0.0589032	-5.43489	5.48317e-08	4.10894e-06	Sig. genes
5	12200	ENSG00000167792.13	NDUFV1	NADH:ubiquinone oxidoreductase core subunit V1 [Source:HGNC Symbol;Acc:HGNC:7716]	468.549	-0.295942	0.060005	-4.93195	8.14148e-07	4.36622e-05	Sig. genes
6	15535	ENSG00000183648.11	NDUFB1	NADH:ubiquinone oxidoreductase subunit B1 [Source:HGNC Symbol;Acc:HGNC:7695]	796.431	-0.430958	0.089608	-4.80937	1.5141e-06	7.38897e-05	Sig. genes
7	1204	ENSG00000072778.20	ACADVL	acyl-CoA dehydrogenase very long chain [Source:HGNC Symbol;Acc:HGNC:92]	684.577	0.307907	0.0653269	4.71333	2.43704e-06	0.000109943	Sig. genes
8	3547	ENSG00000108528.14	SLC25A11	solute carrier family 25 member 11 [Source:HGNC Symbol;Acc:HGNC:10981]	262.638	-0.391002	0.0941305	-4.15383	3.26959e-05	0.00107054	Sig. genes
9	426	ENSG00000023228.14	NDUFS1	NADH:ubiquinone oxidoreductase core subunit S1 [Source:HGNC Symbol;Acc:HGNC:7707]	453.474	-0.52114	0.132731	-3.92628	8.627e-05	0.00235174	Sig. genes
10	4096	ENSG00000112695.12	COX7A2		965.963	-0.293007	0.0748703	-3.91353	9.09567e-05	0.00244703	Sig. genes
11	1870	ENSG00000090266.13	NDUFB2	NADH:ubiquinone oxidoreductase subunit B2 [Source:HGNC Symbol;Acc:HGNC:7697]	592.703	-0.337448	0.0877174	-3.84699	0.00011958	0.00307071	Sig. genes
12	36109	ENSG00000241837.7	ATP5PO	ATP synthase peripheral stalk subunit OSCP [Source:HGNC Symbol;Acc:HGNC:850]	901.841	-0.271609	0.0729495	-3.72324	0.000196679	0.00458066	Sig. genes
13	14428	ENSG00000178127.13	NDUFV2	NADH:ubiquinone oxidoreductase core subunit V2 [Source:HGNC Symbol;Acc:HGNC:7717]	240.944	-0.307879	0.0833702	-3.69291	0.000221702	0.0050135	Sig. genes
14	352	ENSG00000014641.21	MDH1	malate dehydrogenase 1 [Source:HGNC Symbol;Acc:HGNC:6970]	361.245	-0.358217	0.0976751	-3.66743	0.000245002	0.0054374	Sig. genes
15	7291	ENSG00000136521.13	NDUFB5	NADH:ubiquinone oxidoreductase subunit B5 [Source:HGNC Symbol;Acc:HGNC:7700]	187.198	-0.518314	0.149473	-3.4676	0.000525129	0.00963633	Sig. genes
16	12216	ENSG00000167863.12	ATP5PD	ATP synthase peripheral stalk subunit d [Source:HGNC Symbol;Acc:HGNC:845]	401.098	-0.355629	0.103846	-3.42459	0.000615738	0.0109403	Sig. genes
17	4599	ENSG00000116688.18	MFN2	mitofusin 2 [Source:HGNC Symbol;Acc:HGNC:16877]	469.222	-0.32375	0.0946175	-3.42168	0.000622363	0.0110252	Sig. genes
18	12491	ENSG00000169020.10	ATP5ME	ATP synthase membrane subunit e [Source:HGNC Symbol;Acc:HGNC:846]	932.293	-0.34577	0.101061	-3.4214	0.000622998	0.0110256	Sig. genes
19	4400	ENSG00000115286.20	NDUFS7		277.461	-0.318092	0.0930349	-3.41907	0.000628365	0.0110986	Sig. genes
20	9065	ENSG00000148290.10	SURF1	SURF1 cytochrome c oxidase assembly factor [Source:HGNC Symbol;Acc:HGNC:11474]	290.259	-0.276546	0.0818478	-3.37879	0.000728062	0.012514	Sig. genes
21	61	ENSG00000004779.10	NDUFAB1	NADH:ubiquinone oxidoreductase subunit AB1 [Source:HGNC Symbol;Acc:HGNC:7694]	600.181	-0.2145	0.0641621	-3.34309	0.000828514	0.0138421	Sig. genes
22	3055	ENSG00000105220.17	GPI	glucose-6-phosphate isomerase [Source:HGNC Symbol;Acc:HGNC:4458]	1296.54	-0.187626	0.0563489	-3.32971	0.00086936	0.014324	Sig. genes
23	11763	ENSG00000166136.16	NDUFB8	NADH:ubiquinone oxidoreductase subunit B8 [Source:HGNC Symbol;Acc:HGNC:7703]	777.472	-0.235397	0.0745814	-3.15625	0.00159814	0.0230456	Sig. genes
24	9509	ENSG00000152234.16	ATP5F1A	ATP synthase F1 subunit alpha [Source:HGNC Symbol;Acc:HGNC:823]	745.203	-0.379822	0.120941	-3.14055	0.00168632	0.0240653	Sig. genes
25	37560	ENSG00000248098.12	BCKDHA	branched chain keto acid dehydrogenase E1 subunit alpha [Source:HGNC Symbol;Acc:HGNC:986]	190.918	-0.276219	0.08872	-3.11338	0.00184958	0.025779	Sig. genes
26	3805	ENSG00000110719.10	TCIRG1	T cell immune regulator 1, ATPase H+ transporting V0 subunit a3 [Source:HGNC Symbol;Acc:HGNC:11647]	55.0335	-1.03473	0.335542	-3.08375	0.00204409	0.0277137	Sig. genes
27	3223	ENSG00000105953.15	OGDH		227.288	-0.240798	0.0789794	-3.04887	0.00229702	0.030272	Sig. genes
28	14057	ENSG00000176340.4	COX8A	cytochrome c oxidase subunit 8A [Source:HGNC Symbol;Acc:HGNC:2294]	970.341	-0.203036	0.0674022	-3.0123	0.00259277	0.0330509	Sig. genes
29	1230	ENSG00000073578.17	SDHA		402.995	-0.327469	0.111275	-2.94288	0.00325175	0.0387227	Sig. genes
30	3951	ENSG00000111775.3	COX6A1	cytochrome c oxidase subunit 6A1 [Source:HGNC Symbol;Acc:HGNC:2277]	1208.37	-0.240467	0.082393	-2.91853	0.0035168	0.0411092	Sig. genes
31	4505	ENSG00000115944.15	COX7A2L	cytochrome c oxidase subunit 7A2 like [Source:HGNC Symbol;Acc:HGNC:2289]	355.356	0.221618	0.0769794	2.87892	0.00399041	0.0449769	Sig. genes
32	6461	ENSG00000131495.9	NDUFA2	NADH:ubiquinone oxidoreductase subunit A2 [Source:HGNC Symbol;Acc:HGNC:7685]	434.362	-0.200509	0.0719783	-2.78569	0.00534144	0.0559773	Non-sig.
33	429	ENSG00000023330.15	ALAS1	5'-aminolevulinate synthase 1 [Source:HGNC Symbol;Acc:HGNC:396]	141.413	0.315128	0.114843	2.74398	0.00606995	0.0613503	Non-sig.
34	1433	ENSG00000078668.14	VDAC3	voltage dependent anion channel 3 [Source:HGNC Symbol;Acc:HGNC:12674]	522.332	-0.245552	0.0898166	-2.73393	0.00625837	0.0628645	Non-sig.
35	11042	ENSG00000163541.12	SUCLG1	succinate-CoA ligase GDP/ADP-forming subunit alpha [Source:HGNC Symbol;Acc:HGNC:11449]	498.648	-0.223542	0.0827488	-2.70146	0.00690364	0.0669432	Non-sig.
36	6502	ENSG00000131828.14	PDHA1	pyruvate dehydrogenase E1 subunit alpha 1 [Source:HGNC Symbol;Acc:HGNC:8806]	243.695	-0.22551	0.0845547	-2.66703	0.00765242	0.0715284	Non-sig.
37	12492	ENSG00000169021.6	UQCRFS1	ubiquinol-cytochrome c reductase, Rieske iron-sulfur polypeptide 1 [Source:HGNC Symbol;Acc:HGNC:12587]	346.809	-0.223411	0.0842722	-2.65106	0.00802387	0.074076	Non-sig.
38	35962	ENSG00000241468.8	ATP5MF	ATP synthase membrane subunit f [Source:HGNC Symbol;Acc:HGNC:848]	350.899	-0.22898	0.0863926	-2.65045	0.00803838	0.0741718	Non-sig.
39	10274	ENSG00000158864.13	NDUFS2	NADH:ubiquinone oxidoreductase core subunit S2 [Source:HGNC Symbol;Acc:HGNC:7708]	286.356	-0.252071	0.0967167	-2.60628	0.00915305	0.0813554	Non-sig.
40	5959	ENSG00000127884.5	ECHS1	enoyl-CoA hydratase, short chain 1 [Source:HGNC Symbol;Acc:HGNC:3151]	537.104	-0.192223	0.0764757	-2.51352	0.0119533	0.0977999	Non-sig.
41	14535	ENSG00000178741.12	COX5A	cytochrome c oxidase subunit 5A [Source:HGNC Symbol;Acc:HGNC:2267]	847.981	-0.187687	0.0746934	-2.51276	0.0119789	0.0979646	Non-sig.
42	14610	ENSG00000179091.5	CYC1	cytochrome c1 [Source:HGNC Symbol;Acc:HGNC:2579]	402.063	-0.228053	0.0916713	-2.48773	0.0128563	0.103115	Non-sig.
43	11638	ENSG00000165629.20	ATP5F1C	ATP synthase F1 subunit gamma [Source:HGNC Symbol;Acc:HGNC:833]	336.035	-0.297501	0.123329	-2.41226	0.0158538	0.119908	Non-sig.
44	825	ENSG00000060971.19	ACAA1	acetyl-CoA acyltransferase 1 [Source:HGNC Symbol;Acc:HGNC:82]	183.935	-0.319084	0.133293	-2.39386	0.0166722	0.123888	Non-sig.
45	3664	ENSG00000109390.13	NDUFC1	NADH:ubiquinone oxidoreductase subunit C1 [Source:HGNC Symbol;Acc:HGNC:7705]	457.533	-0.237604	0.101411	-2.34299	0.0191301	0.134625	Non-sig.
46	11472	ENSG00000164919.11	COX6C	cytochrome c oxidase subunit 6C [Source:HGNC Symbol;Acc:HGNC:2285]	1275.99	-0.232979	0.0999511	-2.33093	0.0197571	0.137187	Non-sig.
47	1929	ENSG00000091483.8	FH	fumarate hydratase [Source:HGNC Symbol;Acc:HGNC:3700]	145.363	-0.280456	0.120803	-2.3216	0.0202545	0.139684	Non-sig.
48	843	ENSG00000062485.19	CS	citrate synthase [Source:HGNC Symbol;Acc:HGNC:2422]	243.569	-0.262016	0.114417	-2.29001	0.022021	0.146608	Non-sig.
49	1195	ENSG00000072506.14	HSD17B10	hydroxysteroid 17-beta dehydrogenase 10 [Source:HGNC Symbol;Acc:HGNC:4800]	277.014	-0.231306	0.101393	-2.28128	0.0225322	0.148528	Non-sig.
50	3941	ENSG00000111716.14	LDHB	lactate dehydrogenase B [Source:HGNC Symbol;Acc:HGNC:6541]	1012.96	-0.160563	0.0713656	-2.24987	0.0244572	0.156887	Non-sig.
51	933	ENSG00000065518.8	NDUFB4	NADH:ubiquinone oxidoreductase subunit B4 [Source:HGNC Symbol;Acc:HGNC:7699]	598.14	-0.13632	0.0607199	-2.24507	0.0247638	0.158238	Non-sig.
52	8320	ENSG00000143153.13	ATP1B1		2043.36	-0.197758	0.0889914	-2.22221	0.0262691	0.164385	Non-sig.
53	9394	ENSG00000151366.13	NDUFC2	NADH:ubiquinone oxidoreductase subunit C2 [Source:HGNC Symbol;Acc:HGNC:7706]	431.464	-0.160113	0.0727003	-2.20237	0.0276389	0.170049	Non-sig.
54	13218	ENSG00000172115.9	CYCS	cytochrome c, somatic [Source:HGNC Symbol;Acc:HGNC:19986]	483.989	-0.295283	0.135342	-2.18175	0.0291278	0.175536	Non-sig.
55	11642	ENSG00000165637.13	VDAC2		532.679	-0.137496	0.0631169	-2.17843	0.029374	0.176291	Non-sig.
56	9333	ENSG00000150779.12	TIMM8B	translocase of inner mitochondrial membrane 8 homolog B [Source:HGNC Symbol;Acc:HGNC:11818]	228.93	-0.189851	0.0874709	-2.17044	0.0299732	0.17888	Non-sig.
57	6051	ENSG00000128609.16	NDUFA5	NADH:ubiquinone oxidoreductase subunit A5 [Source:HGNC Symbol;Acc:HGNC:7688]	735.278	-0.185606	0.0865113	-2.14545	0.0319167	0.185846	Non-sig.
58	12094	ENSG00000167468.18	GPX4		1018.17	0.178102	0.0834445	2.13438	0.0328115	0.189566	Non-sig.
59	9983	ENSG00000156467.10	UQCRB	ubiquinol-cytochrome c reductase binding protein [Source:HGNC Symbol;Acc:HGNC:12582]	2296.48	-0.148162	0.0696311	-2.12782	0.0333524	0.191231	Non-sig.
60	15136	ENSG00000181991.16	MRPS11	mitochondrial ribosomal protein S11 [Source:HGNC Symbol;Acc:HGNC:14050]	114.878	0.298625	0.140346	2.12777	0.0333561	0.191231	Non-sig.
61	6562	ENSG00000132313.15	MRPL35	mitochondrial ribosomal protein L35 [Source:HGNC Symbol;Acc:HGNC:14489]	144.37	-0.308433	0.145109	-2.12552	0.0335429	0.191689	Non-sig.
62	12237	ENSG00000167969.13	ECI1	enoyl-CoA delta isomerase 1 [Source:HGNC Symbol;Acc:HGNC:2703]	477.27	-0.168728	0.0795597	-2.12077	0.0339413	0.193271	Non-sig.
63	4662	ENSG00000117054.15	ACADM	acyl-CoA dehydrogenase medium chain [Source:HGNC Symbol;Acc:HGNC:89]	293.113	-0.248319	0.117289	-2.11717	0.0342458	0.194342	Non-sig.
64	5813	ENSG00000126267.11	COX6B1	cytochrome c oxidase subunit 6B1 [Source:HGNC Symbol;Acc:HGNC:2280]	928.811	-0.201983	0.0955334	-2.11427	0.0344926	0.195186	Non-sig.
65	7678	ENSG00000138495.7	COX17	cytochrome c oxidase copper chaperone COX17 [Source:HGNC Symbol;Acc:HGNC:2264]	266.784	-0.232367	0.112734	-2.0612	0.0392837	0.212239	Non-sig.
66	8707	ENSG00000145494.12	NDUFS6	NADH:ubiquinone oxidoreductase subunit S6 [Source:HGNC Symbol;Acc:HGNC:7713]	674.656	-0.16074	0.0781353	-2.05719	0.0396675	0.213539	Non-sig.
67	15850	ENSG00000184983.11	NDUFA6	NADH:ubiquinone oxidoreductase subunit A6 [Source:HGNC Symbol;Acc:HGNC:7690]	657.957	-0.164564	0.0807767	-2.03727	0.0416234	0.219442	Non-sig.
68	9118	ENSG00000148672.10	GLUD1	glutamate dehydrogenase 1 [Source:HGNC Symbol;Acc:HGNC:4335]	275.484	-0.12816	0.0633642	-2.02259	0.0431157	0.223527	Non-sig.
69	7780	ENSG00000139180.11	NDUFA9	NADH:ubiquinone oxidoreductase subunit A9 [Source:HGNC Symbol;Acc:HGNC:7693]	333.449	-0.325927	0.162192	-2.00952	0.0444825	0.227363	Non-sig.
70	4571	ENSG00000116459.11	ATP5PB	ATP synthase peripheral stalk-membrane subunit b [Source:HGNC Symbol;Acc:HGNC:840]	571.401	-0.157018	0.079165	-1.98343	0.047319	0.236862	Non-sig.
71	917	ENSG00000065154.12	OAT	ornithine aminotransferase [Source:HGNC Symbol;Acc:HGNC:8091]	118.534	0.305563	0.154237	1.98113	0.0475764	0.237551	Non-sig.
72	49612	ENSG00000267855.6	NDUFA7	NADH:ubiquinone oxidoreductase subunit A7 [Source:HGNC Symbol;Acc:HGNC:7691]	217.181	-0.198385	0.100249	-1.97892	0.0478251	0.238128	Non-sig.
73	11559	ENSG00000165264.11	NDUFB6	NADH:ubiquinone oxidoreductase subunit B6 [Source:HGNC Symbol;Acc:HGNC:7701]	171.175	-0.213306	0.10831	-1.96939	0.0489079	0.241676	Non-sig.
74	22431	ENSG00000213619.11	NDUFS3	NADH:ubiquinone oxidoreductase core subunit S3 [Source:HGNC Symbol;Acc:HGNC:7710]	416.997	-0.163297	0.0833852	-1.95834	0.0501901	0.245669	Non-sig.
75	23004	ENSG00000215021.10	PHB2	prohibitin 2 [Source:HGNC Symbol;Acc:HGNC:30306]	508.598	0.147229	0.0759432	1.93867	0.0525415	0.252487	Non-sig.
76	72	ENSG00000004961.15	HCCS	holocytochrome c synthase [Source:HGNC Symbol;Acc:HGNC:4837]	144.563	-0.243082	0.129924	-1.87096	0.0613509	0.277126	Non-sig.
77	17005	ENSG00000196177.13	ACADSB	acyl-CoA dehydrogenase short/branched chain [Source:HGNC Symbol;Acc:HGNC:91]	99.1341	-0.265023	0.14229	-1.86256	0.0625242	0.280373	Non-sig.
78	4948	ENSG00000119711.13	ALDH6A1	aldehyde dehydrogenase 6 family member A1 [Source:HGNC Symbol;Acc:HGNC:7179]	143.643	-0.306201	0.164615	-1.8601	0.0628714	0.281243	Non-sig.
79	6054	ENSG00000128626.12	MRPS12	mitochondrial ribosomal protein S12 [Source:HGNC Symbol;Acc:HGNC:10380]	130.958	-0.195223	0.105074	-1.85795	0.063176	0.282025	Non-sig.
80	152	ENSG00000006695.12	COX10	cytochrome c oxidase assembly factor heme A:farnesyltransferase COX10 [Source:HGNC Symbol;Acc:HGNC:2260]	56.3023	0.33387	0.182079	1.83365	0.0667053	0.291815	Non-sig.
81	9449	ENSG00000151729.11	SLC25A4	solute carrier family 25 member 4 [Source:HGNC Symbol;Acc:HGNC:10990]	207.957	-0.164975	0.0921774	-1.78975	0.0734938	0.306462	Non-sig.
82	2514	ENSG00000101365.21	IDH3B	isocitrate dehydrogenase (NAD(+)) 3 non-catalytic subunit beta [Source:HGNC Symbol;Acc:HGNC:5385]	237.484	-0.175848	0.0986749	-1.7821	0.0747331	0.309187	Non-sig.
83	9795	ENSG00000154723.13	ATP5PF	ATP synthase peripheral stalk subunit F6 [Source:HGNC Symbol;Acc:HGNC:847]	638.43	-0.162837	0.0917893	-1.77403	0.0760575	0.312716	Non-sig.
84	11298	ENSG00000164258.12	NDUFS4	NADH:ubiquinone oxidoreductase subunit S4 [Source:HGNC Symbol;Acc:HGNC:7711]	269.296	-0.194813	0.109828	-1.77381	0.0760951	0.312798	Non-sig.
85	3094	ENSG00000105379.10	ETFB	electron transfer flavoprotein subunit beta [Source:HGNC Symbol;Acc:HGNC:3482]	436.403	-0.145714	0.083401	-1.74715	0.0806112	0.32342	Non-sig.
86	3804	ENSG00000110717.13	NDUFS8	NADH:ubiquinone oxidoreductase core subunit S8 [Source:HGNC Symbol;Acc:HGNC:7715]	472.009	-0.164084	0.0942971	-1.74007	0.0818464	0.326588	Non-sig.
87	7366	ENSG00000136888.8	ATP6V1G1	ATPase H+ transporting V1 subunit G1 [Source:HGNC Symbol;Acc:HGNC:864]	1174.61	0.105237	0.0606212	1.73598	0.0825679	0.328328	Non-sig.
88	62	ENSG00000004799.8	PDK4	pyruvate dehydrogenase kinase 4 [Source:HGNC Symbol;Acc:HGNC:8812]	96.1377	0.303103	0.177873	1.70404	0.0883729	0.341112	Non-sig.
89	11345	ENSG00000164405.11	UQCRQ	ubiquinol-cytochrome c reductase complex III subunit VII [Source:HGNC Symbol;Acc:HGNC:29594]	1726.43	-0.169495	0.101298	-1.67323	0.0942811	0.351713	Non-sig.
90	5894	ENSG00000127184.13	COX7C	cytochrome c oxidase subunit 7C [Source:HGNC Symbol;Acc:HGNC:2292]	2700.44	-0.0887763	0.0542208	-1.63731	0.101566	0.367038	Non-sig.
91	9773	ENSG00000154518.10	ATP5MC3	ATP synthase membrane subunit c locus 3 [Source:HGNC Symbol;Acc:HGNC:843]	1275.67	-0.221307	0.135329	-1.63533	0.101981	0.368086	Non-sig.
92	2105	ENSG00000099624.8	ATP5F1D	ATP synthase F1 subunit delta [Source:HGNC Symbol;Acc:HGNC:837]	97.8935	-0.252226	0.155934	-1.61752	0.105766	0.376295	Non-sig.
93	19832	ENSG00000204370.13	SDHD	succinate dehydrogenase complex subunit D [Source:HGNC Symbol;Acc:HGNC:10683]	47.2446	-0.35081	0.220146	-1.59353	0.111041	0.386917	Non-sig.
94	9732	ENSG00000154174.8	TOMM70	translocase of outer mitochondrial membrane 70 [Source:HGNC Symbol;Acc:HGNC:11985]	249.103	0.147741	0.0934474	1.58101	0.113875	0.391922	Non-sig.
95	4640	ENSG00000116898.12	MRPS15	mitochondrial ribosomal protein S15 [Source:HGNC Symbol;Acc:HGNC:14504]	230.48	-0.162172	0.105351	-1.53935	0.123718	0.4102	Non-sig.
96	12060	ENSG00000167283.8	ATP5MG		1922.88	-0.121793	0.0799937	-1.52254	0.127874	0.417088	Non-sig.
97	11658	ENSG00000165688.12	PMPCA	peptidase, mitochondrial processing subunit alpha [Source:HGNC Symbol;Acc:HGNC:18667]	108.135	-0.145003	0.0952542	-1.52228	0.12794	0.417226	Non-sig.
98	13555	ENSG00000173660.12	UQCRH	ubiquinol-cytochrome c reductase hinge protein [Source:HGNC Symbol;Acc:HGNC:12590]	1038.62	-0.0904	0.0600433	-1.50558	0.132175	0.423974	Non-sig.
99	13077	ENSG00000171503.13	ETFDH	electron transfer flavoprotein dehydrogenase [Source:HGNC Symbol;Acc:HGNC:3483]	174.147	-0.194713	0.131524	-1.48044	0.138757	0.4328	Non-sig.
100	13711	ENSG00000174547.13	MRPL11	mitochondrial ribosomal protein L11 [Source:HGNC Symbol;Acc:HGNC:14042]	117.7	0.212682	0.146321	1.45353	0.146077	0.44638	Non-sig.
101	5866	ENSG00000126858.19	RHOT1	ras homolog family member T1 [Source:HGNC Symbol;Acc:HGNC:21168]	161.076	-0.192088	0.132448	-1.45029	0.146978	0.447759	Non-sig.
102	2202	ENSG00000100142.16	POLR2F	RNA polymerase II, I and III subunit F [Source:HGNC Symbol;Acc:HGNC:9193]	329.384	-0.127834	0.0890018	-1.4363	0.150916	0.454269	Non-sig.
103	7006	ENSG00000135070.15	ISCA1	iron-sulfur cluster assembly 1 [Source:HGNC Symbol;Acc:HGNC:28660]	126.88	-0.144559	0.100723	-1.43522	0.151226	0.454667	Non-sig.
104	6887	ENSG00000134333.14	LDHA	lactate dehydrogenase A [Source:HGNC Symbol;Acc:HGNC:6535]	3164.47	-0.124951	0.0880151	-1.41966	0.155708	0.461509	Non-sig.
105	22411	ENSG00000213585.11	VDAC1	voltage dependent anion channel 1 [Source:HGNC Symbol;Acc:HGNC:12669]	767.509	-0.120483	0.0854352	-1.41022	0.158475	0.465059	Non-sig.
106	6032	ENSG00000128524.5	ATP6V1F	ATPase H+ transporting V1 subunit F [Source:HGNC Symbol;Acc:HGNC:16832]	650.974	0.115913	0.0822892	1.40861	0.158951	0.465157	Non-sig.
107	2113	ENSG00000099795.7	NDUFB7	NADH:ubiquinone oxidoreductase subunit B7 [Source:HGNC Symbol;Acc:HGNC:7702]	569.331	-0.142518	0.102792	-1.38647	0.165604	0.475316	Non-sig.
108	2221	ENSG00000100216.6	TOMM22	translocase of outer mitochondrial membrane 22 [Source:HGNC Symbol;Acc:HGNC:18002]	251.121	-0.180785	0.130494	-1.38539	0.165933	0.475955	Non-sig.
109	10013	ENSG00000156709.15	AIFM1	apoptosis inducing factor mitochondria associated 1 [Source:HGNC Symbol;Acc:HGNC:8768]	88.2898	-0.280146	0.20339	-1.37738	0.168394	0.479176	Non-sig.
110	77	ENSG00000005022.6	SLC25A5	solute carrier family 25 member 5 [Source:HGNC Symbol;Acc:HGNC:10991]	577.655	-0.128317	0.0952228	-1.34754	0.177806	0.491436	Non-sig.
111	9840	ENSG00000155097.12	ATP6V1C1	ATPase H+ transporting V1 subunit C1 [Source:HGNC Symbol;Acc:HGNC:856]	207.605	0.132649	0.10423	1.27266	0.203138	0.523332	Non-sig.
112	252	ENSG00000010256.11	UQCRC1	ubiquinol-cytochrome c reductase core protein 1 [Source:HGNC Symbol;Acc:HGNC:12585]	294.157	-0.132051	0.104115	-1.26831	0.204686	0.525355	Non-sig.
113	5636	ENSG00000125356.7	NDUFA1	NADH:ubiquinone oxidoreductase subunit A1 [Source:HGNC Symbol;Acc:HGNC:7683]	762.353	-0.110739	0.0875271	-1.2652	0.205801	0.526782	Non-sig.
114	6415	ENSG00000131174.7	COX7B	cytochrome c oxidase subunit 7B [Source:HGNC Symbol;Acc:HGNC:2291]	637.366	-0.157765	0.126682	-1.24536	0.212999	0.534679	Non-sig.
115	824	ENSG00000060762.19	MPC1	mitochondrial pyruvate carrier 1 [Source:HGNC Symbol;Acc:HGNC:21606]	194.428	-0.123212	0.0996847	-1.23601	0.216454	0.538703	Non-sig.
116	6249	ENSG00000130312.7	MRPL34	mitochondrial ribosomal protein L34 [Source:HGNC Symbol;Acc:HGNC:14488]	214.076	-0.133368	0.108367	-1.23071	0.218432	0.541469	Non-sig.
117	4222	ENSG00000113732.9	ATP6V0E1	ATPase H+ transporting V0 subunit e1 [Source:HGNC Symbol;Acc:HGNC:863]	1535.18	0.0780146	0.0639018	1.22085	0.222143	0.546895	Non-sig.
118	14497	ENSG00000178537.10	SLC25A20	solute carrier family 25 member 20 [Source:HGNC Symbol;Acc:HGNC:1421]	61.2378	0.244708	0.200525	1.22033	0.222338	0.546988	Non-sig.
119	7489	ENSG00000137547.9	MRPL15	mitochondrial ribosomal protein L15 [Source:HGNC Symbol;Acc:HGNC:14054]	161.477	-0.149705	0.123552	-1.21168	0.225637	0.551167	Non-sig.
120	2234	ENSG00000100243.21	CYB5R3		630.271	0.0896911	0.0746289	1.20183	0.22943	0.556034	Non-sig.
121	355	ENSG00000014919.13	COX15	cytochrome c oxidase assembly homolog COX15 [Source:HGNC Symbol;Acc:HGNC:2263]	164.339	-0.143399	0.120694	-1.18812	0.234787	0.562316	Non-sig.
122	2970	ENSG00000104823.9	ECH1	enoyl-CoA hydratase 1 [Source:HGNC Symbol;Acc:HGNC:3149]	259.183	0.116584	0.100102	1.16466	0.244158	0.571542	Non-sig.
123	588	ENSG00000042445.14	RETSAT	retinol saturase [Source:HGNC Symbol;Acc:HGNC:25991]	369.213	-0.116468	0.100275	-1.16149	0.245442	0.572902	Non-sig.
124	6895	ENSG00000134375.11	TIMM17A	translocase of inner mitochondrial membrane 17A [Source:HGNC Symbol;Acc:HGNC:17315]	201.124	-0.0954106	0.0828448	-1.15168	0.249453	0.577384	Non-sig.
125	1919	ENSG00000091140.14	DLD		222.269	-0.112883	0.0990429	-1.13974	0.254396	0.583085	Non-sig.
126	1642	ENSG00000084754.12	HADHA	hydroxyacyl-CoA dehydrogenase trifunctional multienzyme complex subunit alpha [Source:HGNC Symbol;Acc:HGNC:4801]	614.528	-0.0902882	0.0795378	-1.13516	0.256308	0.585296	Non-sig.
127	11686	ENSG00000165806.21	CASP7	caspase 7 [Source:HGNC Symbol;Acc:HGNC:1508]	46.8549	-0.203862	0.181048	-1.12601	0.260161	0.589659	Non-sig.
128	8095	ENSG00000141385.11	AFG3L2		324.714	-0.0845793	0.0810636	-1.04337	0.296777	0.628859	Non-sig.
129	11507	ENSG00000165060.15	FXN	frataxin [Source:HGNC Symbol;Acc:HGNC:3951]	82.9147	-0.169683	0.164972	-1.02855	0.303689	0.635792	Non-sig.
130	5468	ENSG00000124172.10	ATP5F1E	ATP synthase F1 subunit epsilon [Source:HGNC Symbol;Acc:HGNC:838]	2201.51	-0.0656527	0.063909	-1.02728	0.304287	0.636433	Non-sig.
131	11845	ENSG00000166411.14	IDH3A	isocitrate dehydrogenase (NAD(+)) 3 catalytic subunit alpha [Source:HGNC Symbol;Acc:HGNC:5384]	352.925	-0.192201	0.188176	-1.02139	0.30707	0.639565	Non-sig.
132	1296	ENSG00000075239.14	ACAT1	acetyl-CoA acetyltransferase 1 [Source:HGNC Symbol;Acc:HGNC:93]	139.507	-0.149761	0.147745	-1.01365	0.310751	0.642451	Non-sig.
133	2336	ENSG00000100554.12	ATP6V1D	ATPase H+ transporting V1 subunit D [Source:HGNC Symbol;Acc:HGNC:13527]	508.947	0.0700227	0.0708436	0.988413	0.32295	0.652988	Non-sig.
134	11208	ENSG00000164039.15	BDH2	3-hydroxybutyrate dehydrogenase 2 [Source:HGNC Symbol;Acc:HGNC:32389]	197.162	-0.102318	0.106252	-0.962975	0.33556	0.664516	Non-sig.
135	6427	ENSG00000131269.19	ABCB7	ATP binding cassette subfamily B member 7 [Source:HGNC Symbol;Acc:HGNC:48]	152.506	-0.107664	0.113845	-0.945708	0.344298	0.672844	Non-sig.
136	7950	ENSG00000140374.16	ETFA		283.845	0.0897109	0.0949272	0.945049	0.344634	0.673401	Non-sig.
137	8338	ENSG00000143198.13	MGST3	microsomal glutathione S-transferase 3 [Source:HGNC Symbol;Acc:HGNC:7064]	630.361	0.102837	0.110217	0.933046	0.350796	0.679008	Non-sig.
138	4868	ENSG00000119013.10	NDUFB3	NADH:ubiquinone oxidoreductase subunit B3 [Source:HGNC Symbol;Acc:HGNC:7698]	128.132	-0.145028	0.155723	-0.931318	0.351689	0.679387	Non-sig.
139	2115	ENSG00000099800.8	TIMM13	translocase of inner mitochondrial membrane 13 [Source:HGNC Symbol;Acc:HGNC:11816]	543.219	0.0824753	0.0890861	0.925793	0.354554	0.682079	Non-sig.
140	8347	ENSG00000143252.16	SDHC	succinate dehydrogenase complex subunit C [Source:HGNC Symbol;Acc:HGNC:10682]	255.247	-0.107364	0.115992	-0.925614	0.354647	0.682079	Non-sig.
141	8873	ENSG00000146701.12	MDH2	malate dehydrogenase 2 [Source:HGNC Symbol;Acc:HGNC:6971]	365.975	-0.0920026	0.100234	-0.917877	0.358683	0.684899	Non-sig.
142	13818	ENSG00000175110.13	MRPS22		82.0032	-0.173956	0.193253	-0.900145	0.368043	0.692743	Non-sig.
143	17890	ENSG00000198836.11	OPA1	OPA1 mitochondrial dynamin like GTPase [Source:HGNC Symbol;Acc:HGNC:8140]	208.026	0.222099	0.253389	0.876516	0.38075	0.703518	Non-sig.
144	4491	ENSG00000115840.14	SLC25A12	solute carrier family 25 member 12 [Source:HGNC Symbol;Acc:HGNC:10982]	54.5809	-0.212474	0.244374	-0.869461	0.384595	0.706447	Non-sig.
145	5967	ENSG00000127948.16	POR	cytochrome p450 oxidoreductase [Source:HGNC Symbol;Acc:HGNC:9208]	174.714	0.109854	0.126668	0.867262	0.385799	0.707159	Non-sig.
146	4131	ENSG00000112992.18	NNT	nicotinamide nucleotide transhydrogenase [Source:HGNC Symbol;Acc:HGNC:7863]	181.277	-0.13784	0.161918	-0.851298	0.394604	0.714297	Non-sig.
147	12066	ENSG00000167315.18	ACAA2	acetyl-CoA acyltransferase 2 [Source:HGNC Symbol;Acc:HGNC:83]	186.845	0.130972	0.155767	0.840821	0.400448	0.717347	Non-sig.
148	7585	ENSG00000138029.14	HADHB	hydroxyacyl-CoA dehydrogenase trifunctional multienzyme complex subunit beta [Source:HGNC Symbol;Acc:HGNC:4803]	176.753	0.101252	0.121968	0.830152	0.406453	0.722323	Non-sig.
149	4705	ENSG00000117410.14	ATP6V0B	ATPase H+ transporting V0 subunit b [Source:HGNC Symbol;Acc:HGNC:861]	862.339	0.0712626	0.0870106	0.81901	0.412781	0.72629	Non-sig.
150	7607	ENSG00000138095.20	LRPPRC	leucine rich pentatricopeptide repeat containing [Source:HGNC Symbol;Acc:HGNC:15714]	400.157	-0.102143	0.12501	-0.817072	0.413887	0.72693	Non-sig.
151	7196	ENSG00000136003.16	ISCU	iron-sulfur cluster assembly enzyme [Source:HGNC Symbol;Acc:HGNC:29882]	319.72	0.0738974	0.0912055	0.810229	0.417808	0.72969	Non-sig.
152	4408	ENSG00000115317.12	HTRA2		55.5241	0.113901	0.146512	0.777412	0.436915	0.746063	Non-sig.
153	5503	ENSG00000124275.15	MTRR	5-methyltetrahydrofolate-homocysteine methyltransferase reductase [Source:HGNC Symbol;Acc:HGNC:7473]	63.4079	0.132588	0.187939	0.705486	0.480508	0.777056	Non-sig.
154	16860	ENSG00000189043.10	NDUFA4	NDUFA4 mitochondrial complex associated [Source:HGNC Symbol;Acc:HGNC:7687]	1681.04	-0.0638018	0.0912116	-0.699492	0.484245	0.779063	Non-sig.
155	4132	ENSG00000112996.11	MRPS30	mitochondrial ribosomal protein S30 [Source:HGNC Symbol;Acc:HGNC:8769]	120.436	-0.0965916	0.140386	-0.688044	0.491425	0.783408	Non-sig.
156	8043	ENSG00000140983.14	RHOT2	ras homolog family member T2 [Source:HGNC Symbol;Acc:HGNC:21169]	261.796	-0.0620007	0.090371	-0.686068	0.49267	0.784132	Non-sig.
157	12515	ENSG00000169100.14_PAR_Y	SLC25A6		1111.79	0.0470084	0.0697788	0.673678	0.500516	0.788811	Non-sig.
158	3747	ENSG00000110090.13	CPT1A	carnitine palmitoyltransferase 1A [Source:HGNC Symbol;Acc:HGNC:2328]	936.922	0.0722733	0.107541	0.672054	0.50155	0.789693	Non-sig.
159	5934	ENSG00000127540.12	UQCR11	ubiquinol-cytochrome c reductase, complex III subunit XI [Source:HGNC Symbol;Acc:HGNC:30862]	1077.71	-0.0482788	0.0720121	-0.670427	0.502586	0.790388	Non-sig.
160	6561	ENSG00000132305.21	IMMT		260.408	-0.067833	0.10139	-0.669031	0.503476	0.791211	Non-sig.
161	12514	ENSG00000169100.14	SLC25A6	solute carrier family 25 member 6 [Source:HGNC Symbol;Acc:HGNC:10992]	1114.94	0.0446398	0.0679902	0.656563	0.511462	0.795509	Non-sig.
162	5073	ENSG00000120662.16	MTRF1	mitochondrial translation release factor 1 [Source:HGNC Symbol;Acc:HGNC:7469]	34.106	0.129229	0.19813	0.652244	0.514244	0.797826	Non-sig.
163	7220	ENSG00000136143.16	SUCLA2	succinate-CoA ligase ADP-forming subunit beta [Source:HGNC Symbol;Acc:HGNC:11448]	45.9959	0.150589	0.234987	0.640841	0.521626	0.802674	Non-sig.
164	7663	ENSG00000138413.14	IDH1	isocitrate dehydrogenase (NADP(+)) 1 [Source:HGNC Symbol;Acc:HGNC:5382]	214.112	0.103702	0.16508	0.62819	0.52988	0.807878	Non-sig.
165	11486	ENSG00000164951.16	PDP1	pyruvate dehydrogenase phosphatase catalytic subunit 1 [Source:HGNC Symbol;Acc:HGNC:9279]	187.017	-0.0894621	0.142649	-0.627149	0.530562	0.8082	Non-sig.
166	1309	ENSG00000075415.15	SLC25A3	solute carrier family 25 member 3 [Source:HGNC Symbol;Acc:HGNC:10989]	1082.56	0.0416327	0.0669888	0.621487	0.534279	0.81079	Non-sig.
167	8011	ENSG00000140740.11	UQCRC2	ubiquinol-cytochrome c reductase core protein 2 [Source:HGNC Symbol;Acc:HGNC:12586]	523.595	-0.0570629	0.0924147	-0.617466	0.536928	0.812194	Non-sig.
168	4668	ENSG00000117118.10	SDHB	succinate dehydrogenase complex iron sulfur subunit B [Source:HGNC Symbol;Acc:HGNC:10681]	148.113	-0.0717525	0.118579	-0.605102	0.545111	0.815426	Non-sig.
169	4942	ENSG00000119689.15	DLST	dihydrolipoamide S-succinyltransferase [Source:HGNC Symbol;Acc:HGNC:2911]	346.593	0.0495868	0.0849182	0.583937	0.559263	0.82296	Non-sig.
170	1080	ENSG00000069535.14	MAOB	monoamine oxidase B [Source:HGNC Symbol;Acc:HGNC:6834]	92.8418	-0.118783	0.231644	-0.512783	0.608103	0.847573	Non-sig.
171	3779	ENSG00000110435.13	PDHX	pyruvate dehydrogenase complex component X [Source:HGNC Symbol;Acc:HGNC:21350]	95.848	-0.067622	0.132623	-0.509881	0.610135	0.848937	Non-sig.
172	2301	ENSG00000100412.17	ACO2	aconitase 2 [Source:HGNC Symbol;Acc:HGNC:118]	204.055	-0.0555685	0.113787	-0.488354	0.625299	0.855434	Non-sig.
173	6402	ENSG00000131100.13	ATP6V1E1	ATPase H+ transporting V1 subunit E1 [Source:HGNC Symbol;Acc:HGNC:857]	1041.63	-0.0336311	0.0702177	-0.478954	0.631971	0.85917	Non-sig.
174	11826	ENSG00000166347.19	CYB5A	cytochrome b5 type A [Source:HGNC Symbol;Acc:HGNC:2570]	87.2562	-0.0585349	0.126103	-0.464183	0.642516	0.864416	Non-sig.
175	11652	ENSG00000165672.7	PRDX3	peroxiredoxin 3 [Source:HGNC Symbol;Acc:HGNC:9354]	210.116	-0.047842	0.103682	-0.461432	0.644488	0.865731	Non-sig.
176	12323	ENSG00000168291.13	PDHB	pyruvate dehydrogenase E1 subunit beta [Source:HGNC Symbol;Acc:HGNC:8808]	140.247	-0.0563448	0.135241	-0.416625	0.676953	0.878949	Non-sig.
177	3049	ENSG00000105197.11	TIMM50	translocase of inner mitochondrial membrane 50 [Source:HGNC Symbol;Acc:HGNC:23656]	142.185	-0.0514842	0.128038	-0.402102	0.687609	0.883371	Non-sig.
178	7066	ENSG00000135390.21	ATP5MC2	ATP synthase membrane subunit c locus 2 [Source:HGNC Symbol;Acc:HGNC:842]	766.182	-0.0277432	0.0718437	-0.38616	0.699378	0.888359	Non-sig.
179	3424	ENSG00000107537.14	PHYH	phytanoyl-CoA 2-hydroxylase [Source:HGNC Symbol;Acc:HGNC:8940]	133.015	0.0478576	0.124878	0.383236	0.701545	0.889849	Non-sig.
180	1158	ENSG00000071553.18	ATP6AP1	ATPase H+ transporting accessory protein 1 [Source:HGNC Symbol;Acc:HGNC:868]	618.303	0.0253567	0.0780578	0.324846	0.745298	0.90997	Non-sig.
181	9870	ENSG00000155463.14	OXA1L	OXA1L mitochondrial inner membrane protein [Source:HGNC Symbol;Acc:HGNC:8526]	407.769	-0.0223865	0.0702866	-0.318503	0.750103	0.912266	Non-sig.
182	6058	ENSG00000128654.14	MTX2	metaxin 2 [Source:HGNC Symbol;Acc:HGNC:7506]	64.7482	-0.0391923	0.125201	-0.313035	0.754254	0.913666	Non-sig.
183	12925	ENSG00000170906.16	NDUFA3	NADH:ubiquinone oxidoreductase subunit A3 [Source:HGNC Symbol;Acc:HGNC:7686]	277.821	0.0674887	0.218773	0.308487	0.757712	0.914899	Non-sig.
184	15150	ENSG00000182054.10	IDH2	isocitrate dehydrogenase (NADP(+)) 2 [Source:HGNC Symbol;Acc:HGNC:5383]	426.183	-0.0469307	0.171606	-0.273479	0.784485	0.926056	Non-sig.
185	11800	ENSG00000166260.13	COX11	cytochrome c oxidase copper chaperone COX11 [Source:HGNC Symbol;Acc:HGNC:2261]	108.526	-0.0461439	0.175487	-0.262947	0.792591	0.929073	Non-sig.
186	7516	ENSG00000137714.3	FDX1	ferredoxin 1 [Source:HGNC Symbol;Acc:HGNC:3638]	143.763	0.0335876	0.132282	0.253909	0.799566	0.9317	Non-sig.
187	4133	ENSG00000113013.16	HSPA9	heat shock protein family A (Hsp70) member 9 [Source:HGNC Symbol;Acc:HGNC:5244]	1352.49	0.0244641	0.113304	0.215915	0.829054	0.943072	Non-sig.
188	2902	ENSG00000104325.7	DECR1	2,4-dienoyl-CoA reductase 1 [Source:HGNC Symbol;Acc:HGNC:2753]	202.461	0.0309718	0.155009	0.199806	0.841632	0.947014	Non-sig.
189	4902	ENSG00000119421.7	NDUFA8	NADH:ubiquinone oxidoreductase subunit A8 [Source:HGNC Symbol;Acc:HGNC:7692]	285.768	-0.0174585	0.0962609	-0.181367	0.85608	0.952634	Non-sig.
190	9990	ENSG00000156502.14	SUPV3L1	Suv3 like RNA helicase [Source:HGNC Symbol;Acc:HGNC:11471]	76.4383	0.0202769	0.134664	0.150575	0.880311	0.960034	Non-sig.
191	5617	ENSG00000125166.13	GOT2	glutamic-oxaloacetic transaminase 2 [Source:HGNC Symbol;Acc:HGNC:4433]	435.121	-0.0120319	0.080679	-0.149133	0.881449	0.960849	Non-sig.
192	2343	ENSG00000100575.14	TIMM9	translocase of inner mitochondrial membrane 9 [Source:HGNC Symbol;Acc:HGNC:11819]	99.4008	0.0229859	0.159982	0.143678	0.885755	0.962211	Non-sig.
193	9330	ENSG00000150768.17	DLAT	dihydrolipoamide S-acetyltransferase [Source:HGNC Symbol;Acc:HGNC:2896]	111.297	0.0116579	0.101761	0.114561	0.908793	0.97202	Non-sig.
194	15641	ENSG00000184076.13	UQCR10	ubiquinol-cytochrome c reductase, complex III subunit X [Source:HGNC Symbol;Acc:HGNC:30863]	445.707	-0.00838223	0.0765991	-0.10943	0.912862	0.973514	Non-sig.
195	3676	ENSG00000109519.13	GRPEL1	GrpE like 1, mitochondrial [Source:HGNC Symbol;Acc:HGNC:19696]	285.273	0.012913	0.12225	0.105628	0.915877	0.974027	Non-sig.
196	618	ENSG00000047249.18	ATP6V1H	ATPase H+ transporting V1 subunit H [Source:HGNC Symbol;Acc:HGNC:18303]	170.086	-0.0103664	0.138715	-0.0747312	0.940429	0.982224	Non-sig.
197	1722	ENSG00000087088.20	BAX		24.2456	-0.00901227	0.282949	-0.0318512	0.974591	0.993676	Non-sig.
198	16088	ENSG00000185883.12	ATP6V0C	ATPase H+ transporting V0 subunit c [Source:HGNC Symbol;Acc:HGNC:855]	2755.06	-0.00128966	0.0593498	-0.0217297	0.982664	0.995442	Non-sig.
199	5553	ENSG00000124588.22	NQO2	N-ribosyldihydronicotinamide:quinone reductase 2 [Source:HGNC Symbol;Acc:HGNC:7856]	119.882	-0.00251556	0.145779	-0.0172559	0.986232	0.996414	Non-sig.
200	6961	ENSG00000134809.9	TIMM10	translocase of inner mitochondrial membrane 10 [Source:HGNC Symbol;Acc:HGNC:11814]	160.552	-0.00145354	0.105419	-0.0137882	0.988999	0.997179	Non-sig.
201	1022	ENSG00000067829.19	IDH3G		122.45	0.000348296	0.149168	0.00233493	0.998137	0.999588	Non-sig.

[truncated: 23 more sheets: KRAS_SIGNALING_UP Endo, P53_PATHWAY Endo, TGF_BETA_SIGNALING Endo, ALLOGRAFT_REJECTION Endo, UV_RESPONSE_DN Endo, E2F_TARGETS Endo, COAGULATION Endo, MYOGENESIS Endo, COMPLEMENT Endo, ESTROGEN_RESPONSE_EARLY Endo, IL2_STAT5_SIGNALING Endo, IL6_JAK_STAT3_SIG Endo, APOPTOSIS Endo, UNFOLDED_PROTEIN_RESP Endo, MITOTIC_SPINDLE Endo, ANDROGEN_RESPONSE Endo, ESTROGEN_RESPONSE_LATE Endo, XENOBIOTIC_METABOLISM Endo, PANCREAS_BETA_CELLS Endo, ESTROGEN_RESPONSE_EARLY Stroma …]
