# Supplementary material for: Cytoprotective Effects of Human Platelet Lysate during the Xeno-Free Culture of Human Donor Corneas
Source: Int J Mol Sci. 2023 Feb 2;24(3):2882. doi: 10.3390/ijms24032882 (PMC9917909; doi:10.3390/ijms24032882)
Supplement: Supplementary file 1 [file ijms-24-02882-s001.zip › supplementary Data S5 .xlsx]

## Sheet: Explanation
	Suppl. Data S5: Excel sheet with RNA concentrations and RNA integrity numbers (RIN) for the analyzed next generation sequencing (NGS) samples (all samples and endothelial and stromal samples separately)

## Sheet: All samples
No.	Name	Conc. [ng/µl]	RIN	Hornhaut	FBS/HPL	Stroma/Endo
1	1a	51.4	8	157/21 R	FBS	Endo
2	1b	13	6.6	157/21 R	FBS	Stroma
3	2a	37.1	7.4	157/21 L	HPL	Endo
4	2b	16	5.8	157/21 L	HPL	Stroma
5	3a	148	7	171/21 R	HPL	Endo
6	3b	15	6.5	171/21 R	HPL	Stroma
7	4a	74.4	6.4	171/21 L	FBS	Endo
8	4b	14	7	171/21 L	FBS	Stroma
9	5a	69	6.8	178/21 R	FBS	Endo
10	5b	16	7.2	178/21 R	FBS	Stroma
11	6a	113	6.3	178/21 L	HPL	Endo
12	6b	14	5.6	178/21 L	HPL	Stroma
13	7a	68.6	7	201/21 R	HPL	Endo
14	7b	4.3	5	201/21 R	HPL	Stroma
15	8a	92	7.5	201/21 L	FBS	Endo
16	8b	12	8	201/21 L	FBS	Stroma
17	9a	83.8	6.6	205/21 R	HPL	Endo
18	9b	8.9	6.2	205/21 R	HPL	Stroma
19	10a	85.5	7.3	205/21 L	FBS	Endo
20	10b	9	7.3	205/21 L	FBS	Stroma
21	11a	105	7.1	209/21 R	FBS	Endo
22	11b	11	6.7	209/21 R	FBS	Stroma
23	12a	54.7	7.4	209/21 L	HPL	Endo
24	12b	16	6.8	209/21 L	HPL	Stroma
25	13a	50.4	7.1	211/21 R	FBS	Endo
26	13b	28.2	7.4	211/21 R	FBS	Stroma
27	14a	50.1	8.1	211/21 L	HPL	Endo
28	14b	13	7.3	211/21 L	HPL	Stroma
29	15a	70.9	8.5	212/21 R	HPL	Endo
30	15b	18	7.3	212/21 R	HPL	Stroma
31	16a	38.7	8.1	212/21 L	FBS	Endo
32	16b	14	7.4	212/21 L	FBS	Stroma
33	17a	57.4	7.2	226/21 R	FBS	Endo
34	17b	8.6	4.3	226/21 R	FBS	Stroma
35	18a	39.7	7.4	226/21 L	HPL	Endo
36	18b	4.2	5.2	226/21 L	HPL	Stroma
37	19a	74.4	8.4	227/21 R	HPL	Endo
38	19b	6.5	5.5	227/21 R	HPL	Stroma
39	20a	57.3	8	227/21 L	FBS	Endo
40	20b	4.6	5.4	227/21 L	FBS	Stroma
41	21a	36.4	7.5	236/21 R	FBS	Endo
42	21b	3.9	7.3	236/21 R	FBS	Stroma
43	22a	25.7	7.8	236/21 L	HPL	Endo
44	22b	23	7.8	236/21 L	HPL	Stroma
45	23a	109	9	245/21 R	HPL	Endo
46	23b	24	7.4	245/21 R	HPL	Stroma
47	24a	77.2	9.1	245/21 L	FBS	Endo
48	24b	17	7.9	245/21 L	FBS	Stroma
49	25a	24	7.4	247/21 R	FBS	Endo
50	25b	17	7.1	247/21 R	FBS	Stroma
51	26a	25.2	7.2	247/21 L	HPL	Endo
52	26b	22	7	247/21 L	HPL	Stroma
53	27a	34.2	7.1	256/21 R	HPL	Endo
54	27b	23	6	256/21 R	HPL	Stroma
55	28a	36.2	7.8	256/21 L	FBS	Endo
56	28b	27.8	7	256/21 L	FBS	Stroma
57	29a	93.5	7.7	257/21 R	FBS	Endo
58	29b	32.3	6.8	257/21 R	FBS	Stroma
59	30a	93	7.9	257/21 L	HPL	Endo
60	30b	29.3	7	257/21 L	HPL	Stroma
	Mean	40.69	7.09833
	SD	33.5379	0.918084
	Median	28	7.2

## Sheet: Endo only
No.	Name	Conc. [ng/µl]	RIN	Hornhaut	FBS/HPL	Stroma/Endo
1	1a	51.4	8	157/21 R	FBS	Endo
3	2a	37.1	7.4	157/21 L	HPL	Endo
5	3a	148	7	171/21 R	HPL	Endo
7	4a	74.4	6.4	171/21 L	FBS	Endo
9	5a	69	6.8	178/21 R	FBS	Endo
11	6a	113	6.3	178/21 L	HPL	Endo
13	7a	68.6	7	201/21 R	HPL	Endo
15	8a	92	7.5	201/21 L	FBS	Endo
17	9a	83.8	6.6	205/21 R	HPL	Endo
19	10a	85.5	7.3	205/21 L	FBS	Endo
21	11a	105	7.1	209/21 R	FBS	Endo
23	12a	54.7	7.4	209/21 L	HPL	Endo
25	13a	50.4	7.1	211/21 R	FBS	Endo
27	14a	50.1	8.1	211/21 L	HPL	Endo
29	15a	70.9	8.5	212/21 R	HPL	Endo
31	16a	38.7	8.1	212/21 L	FBS	Endo
33	17a	57.4	7.2	226/21 R	FBS	Endo
35	18a	39.7	7.4	226/21 L	HPL	Endo
37	19a	74.4	8.4	227/21 R	HPL	Endo
39	20a	57.3	8	227/21 L	FBS	Endo
41	21a	36.4	7.5	236/21 R	FBS	Endo
43	22a	25.7	7.8	236/21 L	HPL	Endo
45	23a	109	9	245/21 R	HPL	Endo
47	24a	77.2	9.1	245/21 L	FBS	Endo
49	25a	24	7.4	247/21 R	FBS	Endo
51	26a	25.2	7.2	247/21 L	HPL	Endo
53	27a	34.2	7.1	256/21 R	HPL	Endo
55	28a	36.2	7.8	256/21 L	FBS	Endo
57	29a	93.5	7.7	257/21 R	FBS	Endo
59	30a	93	7.9	257/21 L	HPL	Endo
	Mean	65.86	7.53667
	SD	30.2599	0.678987
	Median	63	7.4
	Min	24	6.3
	Max	148	9.1

## Sheet: Stroma only
No.	Name	Conc. [ng/µl]	RIN	Hornhaut	FBS/HPL	Stroma/Endo
2	1b	13	6.6	157/21 R	FBS	Stroma
4	2b	16	5.8	157/21 L	HPL	Stroma
6	3b	15	6.5	171/21 R	HPL	Stroma
8	4b	14	7	171/21 L	FBS	Stroma
10	5b	16	7.2	178/21 R	FBS	Stroma
12	6b	14	5.6	178/21 L	HPL	Stroma
14	7b	4.3	5	201/21 R	HPL	Stroma
16	8b	12	8	201/21 L	FBS	Stroma
18	9b	8.9	6.2	205/21 R	HPL	Stroma
20	10b	9	7.3	205/21 L	FBS	Stroma
22	11b	11	6.7	209/21 R	FBS	Stroma
24	12b	16	6.8	209/21 L	HPL	Stroma
26	13b	28.2	7.4	211/21 R	FBS	Stroma
28	14b	13	7.3	211/21 L	HPL	Stroma
30	15b	18	7.3	212/21 R	HPL	Stroma
32	16b	14	7.4	212/21 L	FBS	Stroma
34	17b	8.6	4.3	226/21 R	FBS	Stroma
36	18b	4.2	5.2	226/21 L	HPL	Stroma
38	19b	6.5	5.5	227/21 R	HPL	Stroma
40	20b	4.6	5.4	227/21 L	FBS	Stroma
42	21b	3.9	7.3	236/21 R	FBS	Stroma
44	22b	23	7.8	236/21 L	HPL	Stroma
46	23b	24	7.4	245/21 R	HPL	Stroma
48	24b	17	7.9	245/21 L	FBS	Stroma
50	25b	17	7.1	247/21 R	FBS	Stroma
52	26b	22	7	247/21 L	HPL	Stroma
54	27b	23	6	256/21 R	HPL	Stroma
56	28b	27.8	7	256/21 L	FBS	Stroma
58	29b	32.3	6.8	257/21 R	FBS	Stroma
60	30b	29.3	7	257/21 L	HPL	Stroma
	Mean	15.52	6.66
	SD	7.87109	0.925352
	Median	14.5	7
	Min	3.9	4.3
	Max	32.3	8
